# Supplementary material
Source: publisher figshare collection journal article supplement (https://acs.figshare.com/ndownloader/files/7503229)
Supplement: Supplementary file 1 [file 7503229]

 
data_tcd354 
  
_audit_creation_method            'SHELXL-2014/7' 
_shelx_SHELXL_version_number      '2014/7' 
_chemical_name_systematic         ? 
_chemical_name_common             ? 
_chemical_melting_point           ? 
_chemical_formula_moiety          'C16 H16 Cl N O' 
_chemical_formula_sum 
 'C16 H16 Cl N O' 
_chemical_formula_weight          273.75 
  
loop_ 
 _atom_type_symbol 
 _atom_type_description 
 _atom_type_scat_dispersion_real 
 _atom_type_scat_dispersion_imag 
 _atom_type_scat_source 
 'C'  'C'   0.0181   0.0091 
 'International Tables Vol C Tables 4.2.6.8 and 6.1.1.4' 
 'H'  'H'   0.0000   0.0000 
 'International Tables Vol C Tables 4.2.6.8 and 6.1.1.4' 
 'N'  'N'   0.0311   0.0180 
 'International Tables Vol C Tables 4.2.6.8 and 6.1.1.4' 
 'O'  'O'   0.0492   0.0322 
 'International Tables Vol C Tables 4.2.6.8 and 6.1.1.4' 
 'Cl'  'Cl'   0.3639   0.7018 
 'International Tables Vol C Tables 4.2.6.8 and 6.1.1.4' 
  
_space_group_crystal_system       monoclinic 
_space_group_IT_number            5 
_space_group_name_H-M_alt         'C 2' 
_space_group_name_Hall            'C 2y' 
  
_shelx_space_group_comment 
; 
The symmetry employed for this shelxl refinement is uniquely defined 
by the following loop, which should always be used as a source of 
symmetry information in preference to the above space-group names. 
They are only intended as comments. 
; 
  
loop_ 
 _space_group_symop_operation_xyz 
 'x, y, z' 
 '-x, y, -z' 
 'x+1/2, y+1/2, z' 
 '-x+1/2, y+1/2, -z' 
  
_cell_length_a                    28.4985(9) 
_cell_length_b                    11.4777(4) 
_cell_length_c                    9.0995(3) 
_cell_angle_alpha                 90 
_cell_angle_beta                  103.1880(10) 
_cell_angle_gamma                 90 
_cell_volume                      2897.92(17) 
_cell_formula_units_Z             8 
_cell_measurement_temperature     215(2) 
_cell_measurement_reflns_used     9979 
_cell_measurement_theta_min       3.19 
_cell_measurement_theta_max       68.36 
  
_exptl_crystal_description        plate 
_exptl_crystal_colour             colourless 
_exptl_crystal_density_meas       ? 
_exptl_crystal_density_method     ? 
_exptl_crystal_density_diffrn     1.255 
_exptl_crystal_F_000              1152 
_exptl_transmission_factor_min    ? 
_exptl_transmission_factor_max    ? 
_exptl_crystal_size_max           0.320 
_exptl_crystal_size_mid           0.230 
_exptl_crystal_size_min           0.080 
_exptl_absorpt_coefficient_mu     2.254 
_shelx_estimated_absorpt_T_min    0.532 
_shelx_estimated_absorpt_T_max    0.840 
_exptl_absorpt_correction_type    multi-scan 
_exptl_absorpt_correction_T_min   0.5432 
_exptl_absorpt_correction_T_max   0.7531 
_exptl_absorpt_process_details     
;
SADABS-2014/5 (Bruker, 2014/5) was used for absorption correction.
wR2(int) was 0.1174 before and 0.0707 after correction.
The Ratio of minimum to maximum transmission is 0.7213.
The \l/2 correction factor is 0.00150.
; 
_exptl_absorpt_special_details    ? 
_diffrn_ambient_temperature       215(2) 
_diffrn_radiation_wavelength      1.54178 
_diffrn_radiation_type            CuK\a 
_diffrn_source                    'micro-focus sealed tube' 
_diffrn_measurement_device_type   'Bruker APEX-II CCD' 
_diffrn_measurement_method        '\f and \w scans' 
_diffrn_detector_area_resol_mean  8.258 
_diffrn_reflns_number             21152 
_diffrn_reflns_av_unetI/netI      0.0348 
_diffrn_reflns_av_R_equivalents   0.0391 
_diffrn_reflns_limit_h_min        -34 
_diffrn_reflns_limit_h_max        34 
_diffrn_reflns_limit_k_min        -13 
_diffrn_reflns_limit_k_max        13 
_diffrn_reflns_limit_l_min        -10 
_diffrn_reflns_limit_l_max        10 
_diffrn_reflns_theta_min          3.185 
_diffrn_reflns_theta_max          68.525 
_diffrn_reflns_theta_full         67.679 
_diffrn_measured_fraction_theta_max   0.997 
_diffrn_measured_fraction_theta_full  1.000 
_diffrn_reflns_Laue_measured_fraction_max    0.997 
_diffrn_reflns_Laue_measured_fraction_full   1.000 
_diffrn_reflns_point_group_measured_fraction_max   0.997 
_diffrn_reflns_point_group_measured_fraction_full  1.000 
_reflns_number_total              5295 
_reflns_number_gt                 5071 
_reflns_threshold_expression      'I > 2\s(I)' 
_reflns_Friedel_coverage          0.898 
_reflns_Friedel_fraction_max      0.997 
_reflns_Friedel_fraction_full     1.000 
  
_reflns_special_details 
; 
 Reflections were merged by SHELXL according to the crystal 
 class for the calculation of statistics and refinement. 
  
 _reflns_Friedel_fraction is defined as the number of unique 
 Friedel pairs measured divided by the number that would be 
 possible theoretically, ignoring centric projections and 
 systematic absences. 
; 
  
_computing_data_collection        'APEX2 Ver. 2014.11-0 (Bruker, 2014)' 
_computing_cell_refinement        'SAINT+ Ver. 8.34A (Bruker, 2013)' 
_computing_data_reduction         'SAINT+ Ver. 8.34A (Bruker, 2013)' 
_computing_structure_solution     'SHELXT-2014/4 (Sheldrick, 2014)' 
_computing_structure_refinement   'SHELXL-2014/7 (Sheldrick, 2014)' 
_computing_molecular_graphics     'SHELXTL (Bruker, 2008-2014)' 
_computing_publication_material   'SHELXTL (Bruker, 2008-2014)' 

_refine_special_details 
; 
 Refined as a 2-component inversion twin. 
The compound undergoes a destructive phase change at 100K. Data 
were collected at 215K which preserved the integrity of the sample. 
One phenyl ring is disordered (51:49% occupancy) and constraints (EADP) 
were used to in the model. The amido hydrogens were located on the 
difference map and were modelled with restraints (DFIX).
; 

_refine_ls_structure_factor_coef  Fsqd 
_refine_ls_matrix_type            full 
_refine_ls_weighting_scheme       calc 
_refine_ls_weighting_details 
'w=1/[\s^2^(Fo^2^)+(0.0626P)^2^+1.7159P] where P=(Fo^2^+2Fc^2^)/3' 
_atom_sites_solution_primary      ? 
_atom_sites_solution_secondary    ? 
_atom_sites_solution_hydrogens    mixed 
_refine_ls_hydrogen_treatment     mixed 
_refine_ls_extinction_method      none 
_refine_ls_extinction_coef        . 
_refine_ls_abs_structure_details 
; 
 Refined as an inversion twin. 
; 
_refine_ls_abs_structure_Flack    0.06(2) 
_chemical_absolute_configuration  ad 
_refine_ls_number_reflns          5295 
_refine_ls_number_parameters      321 
_refine_ls_number_restraints      3 
_refine_ls_R_factor_all           0.0438 
_refine_ls_R_factor_gt            0.0423 
_refine_ls_wR_factor_ref          0.1166 
_refine_ls_wR_factor_gt           0.1148 
_refine_ls_goodness_of_fit_ref    1.061 
_refine_ls_restrained_S_all       1.061 
_refine_ls_shift/su_max           0.000 
_refine_ls_shift/su_mean          0.000 
  
loop_ 
 _atom_site_label 
 _atom_site_type_symbol 
 _atom_site_fract_x 
 _atom_site_fract_y 
 _atom_site_fract_z 
 _atom_site_U_iso_or_equiv 
 _atom_site_adp_type 
 _atom_site_occupancy 
 _atom_site_site_symmetry_order 
 _atom_site_calc_flag 
 _atom_site_refinement_flags_posn 
 _atom_site_refinement_flags_adp 
 _atom_site_refinement_flags_occupancy 
 _atom_site_disorder_assembly 
 _atom_site_disorder_group 
C1 C 0.88141(15) 0.4319(4) 0.6026(5) 0.0543(9) Uani 1 1 d . . . . . 
H1A H 0.8732 0.4824 0.5194 0.065 Uiso 1 1 calc R U . . . 
Cl1 Cl 0.77845(3) 0.31246(6) 0.40741(8) 0.0436(2) Uani 1 1 d . . . . . 
C2 C 0.92935(16) 0.4129(5) 0.6700(5) 0.0656(12) Uani 1 1 d . . . . . 
H2A H 0.9535 0.4508 0.6326 0.079 Uiso 1 1 calc R U . . . 
Cl2 Cl 0.78459(4) 0.69551(7) 0.92446(10) 0.0556(3) Uani 1 1 d . . . . . 
C3 C 0.94198(15) 0.3390(4) 0.7915(5) 0.0628(12) Uani 1 1 d . . . . . 
H3A H 0.9746 0.3259 0.8368 0.075 Uiso 1 1 calc R U . . . 
C4 C 0.90630(15) 0.2839(4) 0.8468(5) 0.0585(10) Uani 1 1 d . . . . . 
H4A H 0.9147 0.2332 0.9298 0.070 Uiso 1 1 calc R U . . . 
C5 C 0.85826(13) 0.3035(3) 0.7798(4) 0.0462(8) Uani 1 1 d . . . . . 
H5A H 0.8342 0.2665 0.8183 0.055 Uiso 1 1 calc R U . . . 
C6 C 0.84526(12) 0.3774(3) 0.6562(4) 0.0400(7) Uani 1 1 d . . . . . 
C7 C 0.79271(12) 0.3950(3) 0.5841(3) 0.0390(7) Uani 1 1 d . . . . . 
H7A H 0.7734 0.3629 0.6524 0.047 Uiso 1 1 calc R U . . . 
C8 C 0.77780(13) 0.5212(3) 0.5496(4) 0.0429(8) Uani 1 1 d . . . . . 
H8A H 0.7827 0.5641 0.6451 0.052 Uiso 1 1 calc R U . . . 
H8B H 0.7991 0.5557 0.4908 0.052 Uiso 1 1 calc R U . . . 
C9 C 0.72626(13) 0.5377(3) 0.4640(4) 0.0408(7) Uani 1 1 d . . . . . 
O10 O 0.71699(10) 0.5775(2) 0.3343(3) 0.0501(7) Uani 1 1 d . . . . . 
N11 N 0.69236(12) 0.5083(3) 0.5365(3) 0.0453(7) Uani 1 1 d D . . . . 
H11 H 0.7007(15) 0.488(4) 0.633(2) 0.054 Uiso 1 1 d D U . . . 
C12 C 0.64198(14) 0.5288(4) 0.4705(4) 0.0514(9) Uani 1 1 d . . . . . 
H12C H 0.6395 0.5949 0.4009 0.062 Uiso 0.488(9) 1 calc R U P A 2 
H12D H 0.6263 0.5518 0.5513 0.062 Uiso 0.488(9) 1 calc R U P A 2 
H12A H 0.6389 0.6026 0.4149 0.062 Uiso 0.512(9) 1 calc R U P A 1 
H12B H 0.6250 0.5377 0.5522 0.062 Uiso 0.512(9) 1 calc R U P A 1 
C13A C 0.6168(2) 0.4327(7) 0.3629(7) 0.0656(14) Uani 0.512(9) 1 d G . P A 1 
C14A C 0.63816(18) 0.3257(8) 0.3489(8) 0.0656(14) Uani 0.512(9) 1 d G . P A 1 
H14A H 0.6693 0.3095 0.4065 0.079 Uiso 0.512(9) 1 calc R U P A 1 
C15A C 0.6135(2) 0.2425(6) 0.2497(9) 0.0656(14) Uani 0.512(9) 1 d G . P A 1 
H15A H 0.6279 0.1701 0.2402 0.079 Uiso 0.512(9) 1 calc R U P A 1 
C16A C 0.5675(2) 0.2663(5) 0.1645(8) 0.0656(14) Uani 0.512(9) 1 d G . P A 1 
H16A H 0.5508 0.2100 0.0974 0.079 Uiso 0.512(9) 1 calc R U P A 1 
C17A C 0.54611(17) 0.3734(6) 0.1786(7) 0.0656(14) Uani 0.512(9) 1 d G . P A 1 
H17A H 0.5150 0.3895 0.1210 0.079 Uiso 0.512(9) 1 calc R U P A 1 
C18A C 0.5708(2) 0.4566(5) 0.2778(8) 0.0656(14) Uani 0.512(9) 1 d G . P A 1 
H18A H 0.5563 0.5290 0.2873 0.079 Uiso 0.512(9) 1 calc R U P A 1 
C13B C 0.6144(2) 0.4283(6) 0.3866(8) 0.0614(14) Uani 0.488(9) 1 d G . P A 2 
C14B C 0.63689(17) 0.3368(7) 0.3297(10) 0.0614(14) Uani 0.488(9) 1 d G . P A 2 
H14B H 0.6706 0.3359 0.3441 0.074 Uiso 0.488(9) 1 calc R U P A 2 
C15B C 0.6095(2) 0.2467(6) 0.2516(9) 0.0614(14) Uani 0.488(9) 1 d G . P A 2 
H15B H 0.6247 0.1848 0.2131 0.074 Uiso 0.488(9) 1 calc R U P A 2 
C16B C 0.5596(2) 0.2481(5) 0.2303(8) 0.0614(14) Uani 0.488(9) 1 d G . P A 2 
H16B H 0.5411 0.1871 0.1774 0.074 Uiso 0.488(9) 1 calc R U P A 2 
C17B C 0.53715(17) 0.3396(5) 0.2871(8) 0.0614(14) Uani 0.488(9) 1 d G . P A 2 
H17B H 0.5034 0.3405 0.2727 0.074 Uiso 0.488(9) 1 calc R U P A 2 
C18B C 0.5645(2) 0.4297(5) 0.3653(8) 0.0614(14) Uani 0.488(9) 1 d G . P A 2 
H18B H 0.5494 0.4916 0.4038 0.074 Uiso 0.488(9) 1 calc R U P A 2 
C19 C 0.90245(16) 0.5458(4) 1.0813(5) 0.0635(11) Uani 1 1 d . . . . . 
H19A H 0.9008 0.4992 0.9954 0.076 Uiso 1 1 calc R U . . . 
C20 C 0.94658(19) 0.5686(6) 1.1762(7) 0.0878(18) Uani 1 1 d . . . . . 
H20A H 0.9749 0.5388 1.1541 0.105 Uiso 1 1 calc R U . . . 
C21 C 0.9490(2) 0.6351(7) 1.3036(7) 0.096(2) Uani 1 1 d . . . . . 
H21A H 0.9790 0.6496 1.3693 0.116 Uiso 1 1 calc R U . . . 
C22 C 0.9080(2) 0.6803(6) 1.3350(5) 0.0784(15) Uani 1 1 d . . . . . 
H22A H 0.9099 0.7267 1.4212 0.094 Uiso 1 1 calc R U . . . 
C23 C 0.86353(18) 0.6576(4) 1.2396(5) 0.0618(11) Uani 1 1 d . . . . . 
H23A H 0.8353 0.6878 1.2619 0.074 Uiso 1 1 calc R U . . . 
C24 C 0.86074(14) 0.5904(3) 1.1110(4) 0.0460(8) Uani 1 1 d . . . . . 
C25 C 0.81342(13) 0.5619(3) 1.0060(4) 0.0420(7) Uani 1 1 d . . . . . 
H25A H 0.8200 0.5134 0.9230 0.050 Uiso 1 1 calc R U . . . 
C26 C 0.77879(14) 0.4960(4) 1.0793(4) 0.0487(9) Uani 1 1 d . . . . . 
H26A H 0.7936 0.4219 1.1184 0.058 Uiso 1 1 calc R U . . . 
H26B H 0.7733 0.5413 1.1651 0.058 Uiso 1 1 calc R U . . . 
C27 C 0.73098(13) 0.4719(3) 0.9730(4) 0.0413(7) Uani 1 1 d . . . . . 
O28 O 0.72848(10) 0.4372(3) 0.8434(3) 0.0520(7) Uani 1 1 d . . . . . 
N29 N 0.69256(11) 0.4892(3) 1.0304(3) 0.0442(7) Uani 1 1 d D . . . . 
H29 H 0.6975(15) 0.520(4) 1.122(3) 0.053 Uiso 1 1 d D U . . . 
C30 C 0.64433(14) 0.4617(4) 0.9492(5) 0.0518(9) Uani 1 1 d . . . . . 
H30A H 0.6262 0.4329 1.0213 0.062 Uiso 1 1 calc R U . . . 
H30B H 0.6460 0.3983 0.8784 0.062 Uiso 1 1 calc R U . . . 
C31 C 0.61671(13) 0.5622(3) 0.8619(4) 0.0451(8) Uani 1 1 d . . . . . 
C32 C 0.63815(13) 0.6639(3) 0.8309(4) 0.0460(8) Uani 1 1 d . . . . . 
H32A H 0.6714 0.6744 0.8686 0.055 Uiso 1 1 calc R U . . . 
C33 C 0.61167(15) 0.7506(4) 0.7456(5) 0.0591(10) Uani 1 1 d . . . . . 
H33A H 0.6272 0.8188 0.7245 0.071 Uiso 1 1 calc R U . . . 
C34 C 0.56385(18) 0.7388(6) 0.6921(7) 0.0820(16) Uani 1 1 d . . . . . 
H34A H 0.5458 0.7986 0.6352 0.098 Uiso 1 1 calc R U . . . 
C35 C 0.54224(18) 0.6397(7) 0.7215(9) 0.101(2) Uani 1 1 d . . . . . 
H35A H 0.5088 0.6310 0.6847 0.121 Uiso 1 1 calc R U . . . 
C36 C 0.56827(17) 0.5511(5) 0.8045(7) 0.0826(16) Uani 1 1 d . . . . . 
H36A H 0.5525 0.4822 0.8217 0.099 Uiso 1 1 calc R U . . . 
  
loop_ 
 _atom_site_aniso_label 
 _atom_site_aniso_U_11 
 _atom_site_aniso_U_22 
 _atom_site_aniso_U_33 
 _atom_site_aniso_U_23 
 _atom_site_aniso_U_13 
 _atom_site_aniso_U_12 
C1 0.057(2) 0.060(2) 0.045(2) 0.0085(18) 0.0098(16) -0.0053(18) 
Cl1 0.0590(5) 0.0348(4) 0.0353(4) -0.0058(3) 0.0069(3) -0.0011(3) 
C2 0.051(2) 0.083(3) 0.064(3) -0.005(2) 0.0163(19) -0.015(2) 
Cl2 0.0697(6) 0.0388(5) 0.0521(5) 0.0105(4) 0.0012(4) 0.0059(4) 
C3 0.051(2) 0.071(3) 0.060(2) -0.009(2) 0.0010(18) 0.0065(19) 
C4 0.065(2) 0.055(3) 0.051(2) 0.0047(18) 0.0025(17) 0.0076(19) 
C5 0.0548(19) 0.0409(19) 0.0421(17) 0.0001(16) 0.0091(14) -0.0001(16) 
C6 0.0492(18) 0.0370(17) 0.0340(16) -0.0070(14) 0.0104(13) -0.0033(14) 
C7 0.0518(18) 0.0370(17) 0.0292(15) -0.0025(13) 0.0111(13) -0.0029(14) 
C8 0.056(2) 0.0375(18) 0.0341(16) -0.0078(14) 0.0084(14) -0.0035(15) 
C9 0.060(2) 0.0299(16) 0.0329(16) -0.0082(14) 0.0108(14) 0.0063(14) 
O10 0.0708(17) 0.0494(16) 0.0301(12) 0.0020(11) 0.0117(11) 0.0096(12) 
N11 0.0624(18) 0.0444(17) 0.0288(14) -0.0021(12) 0.0097(13) 0.0023(14) 
C12 0.060(2) 0.052(2) 0.045(2) -0.0035(17) 0.0188(17) 0.0094(18) 
C13A 0.052(2) 0.080(3) 0.071(3) -0.021(2) 0.0254(18) -0.0038(18) 
C14A 0.052(2) 0.080(3) 0.071(3) -0.021(2) 0.0254(18) -0.0038(18) 
C15A 0.052(2) 0.080(3) 0.071(3) -0.021(2) 0.0254(18) -0.0038(18) 
C16A 0.052(2) 0.080(3) 0.071(3) -0.021(2) 0.0254(18) -0.0038(18) 
C17A 0.052(2) 0.080(3) 0.071(3) -0.021(2) 0.0254(18) -0.0038(18) 
C18A 0.052(2) 0.080(3) 0.071(3) -0.021(2) 0.0254(18) -0.0038(18) 
C13B 0.060(2) 0.050(2) 0.069(3) 0.0083(19) 0.0021(17) -0.0025(17) 
C14B 0.060(2) 0.050(2) 0.069(3) 0.0083(19) 0.0021(17) -0.0025(17) 
C15B 0.060(2) 0.050(2) 0.069(3) 0.0083(19) 0.0021(17) -0.0025(17) 
C16B 0.060(2) 0.050(2) 0.069(3) 0.0083(19) 0.0021(17) -0.0025(17) 
C17B 0.060(2) 0.050(2) 0.069(3) 0.0083(19) 0.0021(17) -0.0025(17) 
C18B 0.060(2) 0.050(2) 0.069(3) 0.0083(19) 0.0021(17) -0.0025(17) 
C19 0.063(2) 0.063(3) 0.059(2) -0.001(2) 0.0021(19) 0.013(2) 
C20 0.064(3) 0.109(5) 0.081(4) -0.006(3) -0.005(3) 0.023(3) 
C21 0.081(4) 0.125(5) 0.066(3) 0.006(3) -0.020(3) -0.001(4) 
C22 0.096(4) 0.087(4) 0.045(2) -0.005(2) 0.001(2) -0.017(3) 
C23 0.080(3) 0.061(3) 0.044(2) -0.0012(18) 0.0127(19) -0.006(2) 
C24 0.059(2) 0.0383(18) 0.0385(18) 0.0099(14) 0.0076(15) 0.0025(15) 
C25 0.058(2) 0.0356(17) 0.0325(15) 0.0044(13) 0.0106(14) 0.0069(14) 
C26 0.056(2) 0.054(2) 0.0361(18) 0.0098(16) 0.0106(15) 0.0039(17) 
C27 0.057(2) 0.0382(18) 0.0291(16) 0.0058(14) 0.0117(14) 0.0036(15) 
O28 0.0717(17) 0.0542(17) 0.0323(12) 0.0007(11) 0.0164(11) 0.0016(13) 
N29 0.0528(17) 0.0458(18) 0.0349(14) -0.0023(13) 0.0117(13) -0.0022(14) 
C30 0.056(2) 0.048(2) 0.053(2) 0.0000(17) 0.0168(17) -0.0090(17) 
C31 0.0454(18) 0.047(2) 0.0449(19) -0.0092(16) 0.0148(15) -0.0046(15) 
C32 0.0474(18) 0.046(2) 0.0465(19) -0.0027(15) 0.0143(14) -0.0005(15) 
C33 0.058(2) 0.052(2) 0.068(3) 0.006(2) 0.0146(19) 0.0070(18) 
C34 0.059(3) 0.079(3) 0.103(4) 0.015(3) 0.007(3) 0.012(2) 
C35 0.042(2) 0.108(5) 0.140(6) 0.021(4) -0.004(3) -0.008(3) 
C36 0.050(2) 0.076(3) 0.118(5) 0.011(3) 0.012(3) -0.017(2) 
  
_geom_special_details 
; 
 All esds (except the esd in the dihedral angle between two l.s. planes) 
 are estimated using the full covariance matrix.  The cell esds are taken 
 into account individually in the estimation of esds in distances, angles 
 and torsion angles; correlations between esds in cell parameters are only 
 used when they are defined by crystal symmetry.  An approximate (isotropic) 
 treatment of cell esds is used for estimating esds involving l.s. planes. 
; 
  
loop_ 
 _geom_bond_atom_site_label_1 
 _geom_bond_atom_site_label_2 
 _geom_bond_distance 
 _geom_bond_site_symmetry_2 
 _geom_bond_publ_flag 
C1 C2 1.381(6) . ? 
C1 C6 1.386(5) . ? 
C1 H1A 0.9400 . ? 
Cl1 C7 1.830(3) . ? 
C2 C3 1.375(7) . ? 
C2 H2A 0.9400 . ? 
Cl2 C25 1.816(3) . ? 
C3 C4 1.386(7) . ? 
C3 H3A 0.9400 . ? 
C4 C5 1.384(5) . ? 
C4 H4A 0.9400 . ? 
C5 C6 1.389(5) . ? 
C5 H5A 0.9400 . ? 
C6 C7 1.505(5) . ? 
C7 C8 1.522(5) . ? 
C7 H7A 0.9900 . ? 
C8 C9 1.509(5) . ? 
C8 H8A 0.9800 . ? 
C8 H8B 0.9800 . ? 
C9 O10 1.236(4) . ? 
C9 N11 1.331(5) . ? 
N11 C12 1.444(5) . ? 
N11 H11 0.892(14) . ? 
C12 C13B 1.503(7) . ? 
C12 C13A 1.539(7) . ? 
C12 H12C 0.9800 . ? 
C12 H12D 0.9800 . ? 
C12 H12A 0.9800 . ? 
C12 H12B 0.9800 . ? 
C13A C14A 1.3900 . ? 
C13A C18A 1.3900 . ? 
C14A C15A 1.3900 . ? 
C14A H14A 0.9400 . ? 
C15A C16A 1.3900 . ? 
C15A H15A 0.9400 . ? 
C16A C17A 1.3900 . ? 
C16A H16A 0.9400 . ? 
C17A C18A 1.3900 . ? 
C17A H17A 0.9400 . ? 
C18A H18A 0.9400 . ? 
C13B C14B 1.3900 . ? 
C13B C18B 1.3900 . ? 
C14B C15B 1.3900 . ? 
C14B H14B 0.9400 . ? 
C15B C16B 1.3900 . ? 
C15B H15B 0.9400 . ? 
C16B C17B 1.3900 . ? 
C16B H16B 0.9400 . ? 
C17B C18B 1.3900 . ? 
C17B H17B 0.9400 . ? 
C18B H18B 0.9400 . ? 
C19 C24 1.376(6) . ? 
C19 C20 1.378(7) . ? 
C19 H19A 0.9400 . ? 
C20 C21 1.377(9) . ? 
C20 H20A 0.9400 . ? 
C21 C22 1.367(9) . ? 
C21 H21A 0.9400 . ? 
C22 C23 1.387(7) . ? 
C22 H22A 0.9400 . ? 
C23 C24 1.389(6) . ? 
C23 H23A 0.9400 . ? 
C24 C25 1.500(5) . ? 
C25 C26 1.514(5) . ? 
C25 H25A 0.9900 . ? 
C26 C27 1.506(5) . ? 
C26 H26A 0.9800 . ? 
C26 H26B 0.9800 . ? 
C27 O28 1.231(4) . ? 
C27 N29 1.331(5) . ? 
N29 C30 1.439(5) . ? 
N29 H29 0.887(14) . ? 
C30 C31 1.515(6) . ? 
C30 H30A 0.9800 . ? 
C30 H30B 0.9800 . ? 
C31 C36 1.366(6) . ? 
C31 C32 1.377(5) . ? 
C32 C33 1.376(6) . ? 
C32 H32A 0.9400 . ? 
C33 C34 1.345(6) . ? 
C33 H33A 0.9400 . ? 
C34 C35 1.348(9) . ? 
C34 H34A 0.9400 . ? 
C35 C36 1.378(9) . ? 
C35 H35A 0.9400 . ? 
C36 H36A 0.9400 . ? 
  
loop_ 
 _geom_angle_atom_site_label_1 
 _geom_angle_atom_site_label_2 
 _geom_angle_atom_site_label_3 
 _geom_angle 
 _geom_angle_site_symmetry_1 
 _geom_angle_site_symmetry_3 
 _geom_angle_publ_flag 
C2 C1 C6 120.8(4) . . ? 
C2 C1 H1A 119.6 . . ? 
C6 C1 H1A 119.6 . . ? 
C3 C2 C1 120.3(4) . . ? 
C3 C2 H2A 119.8 . . ? 
C1 C2 H2A 119.8 . . ? 
C2 C3 C4 119.6(4) . . ? 
C2 C3 H3A 120.2 . . ? 
C4 C3 H3A 120.2 . . ? 
C5 C4 C3 120.0(4) . . ? 
C5 C4 H4A 120.0 . . ? 
C3 C4 H4A 120.0 . . ? 
C4 C5 C6 120.7(4) . . ? 
C4 C5 H5A 119.7 . . ? 
C6 C5 H5A 119.7 . . ? 
C1 C6 C5 118.6(3) . . ? 
C1 C6 C7 122.1(3) . . ? 
C5 C6 C7 119.3(3) . . ? 
C6 C7 C8 114.9(3) . . ? 
C6 C7 Cl1 108.2(2) . . ? 
C8 C7 Cl1 108.4(2) . . ? 
C6 C7 H7A 108.4 . . ? 
C8 C7 H7A 108.4 . . ? 
Cl1 C7 H7A 108.4 . . ? 
C9 C8 C7 114.8(3) . . ? 
C9 C8 H8A 108.6 . . ? 
C7 C8 H8A 108.6 . . ? 
C9 C8 H8B 108.6 . . ? 
C7 C8 H8B 108.6 . . ? 
H8A C8 H8B 107.5 . . ? 
O10 C9 N11 123.0(3) . . ? 
O10 C9 C8 120.7(3) . . ? 
N11 C9 C8 116.3(3) . . ? 
C9 N11 C12 121.2(3) . . ? 
C9 N11 H11 120(3) . . ? 
C12 N11 H11 118(3) . . ? 
N11 C12 C13B 116.2(4) . . ? 
N11 C12 C13A 115.0(4) . . ? 
N11 C12 H12C 108.2 . . ? 
C13B C12 H12C 108.2 . . ? 
N11 C12 H12D 108.2 . . ? 
C13B C12 H12D 108.2 . . ? 
H12C C12 H12D 107.4 . . ? 
N11 C12 H12A 108.5 . . ? 
C13A C12 H12A 108.5 . . ? 
N11 C12 H12B 108.5 . . ? 
C13A C12 H12B 108.5 . . ? 
H12A C12 H12B 107.5 . . ? 
C14A C13A C18A 120.0 . . ? 
C14A C13A C12 122.8(5) . . ? 
C18A C13A C12 117.2(5) . . ? 
C13A C14A C15A 120.0 . . ? 
C13A C14A H14A 120.0 . . ? 
C15A C14A H14A 120.0 . . ? 
C14A C15A C16A 120.0 . . ? 
C14A C15A H15A 120.0 . . ? 
C16A C15A H15A 120.0 . . ? 
C17A C16A C15A 120.0 . . ? 
C17A C16A H16A 120.0 . . ? 
C15A C16A H16A 120.0 . . ? 
C16A C17A C18A 120.0 . . ? 
C16A C17A H17A 120.0 . . ? 
C18A C17A H17A 120.0 . . ? 
C17A C18A C13A 120.0 . . ? 
C17A C18A H18A 120.0 . . ? 
C13A C18A H18A 120.0 . . ? 
C14B C13B C18B 120.0 . . ? 
C14B C13B C12 122.5(5) . . ? 
C18B C13B C12 117.5(5) . . ? 
C15B C14B C13B 120.0 . . ? 
C15B C14B H14B 120.0 . . ? 
C13B C14B H14B 120.0 . . ? 
C14B C15B C16B 120.0 . . ? 
C14B C15B H15B 120.0 . . ? 
C16B C15B H15B 120.0 . . ? 
C15B C16B C17B 120.0 . . ? 
C15B C16B H16B 120.0 . . ? 
C17B C16B H16B 120.0 . . ? 
C18B C17B C16B 120.0 . . ? 
C18B C17B H17B 120.0 . . ? 
C16B C17B H17B 120.0 . . ? 
C17B C18B C13B 120.0 . . ? 
C17B C18B H18B 120.0 . . ? 
C13B C18B H18B 120.0 . . ? 
C24 C19 C20 120.8(5) . . ? 
C24 C19 H19A 119.6 . . ? 
C20 C19 H19A 119.6 . . ? 
C21 C20 C19 119.7(5) . . ? 
C21 C20 H20A 120.1 . . ? 
C19 C20 H20A 120.1 . . ? 
C22 C21 C20 120.3(5) . . ? 
C22 C21 H21A 119.8 . . ? 
C20 C21 H21A 119.8 . . ? 
C21 C22 C23 120.0(5) . . ? 
C21 C22 H22A 120.0 . . ? 
C23 C22 H22A 120.0 . . ? 
C22 C23 C24 120.0(5) . . ? 
C22 C23 H23A 120.0 . . ? 
C24 C23 H23A 120.0 . . ? 
C19 C24 C23 119.1(4) . . ? 
C19 C24 C25 119.0(4) . . ? 
C23 C24 C25 121.9(4) . . ? 
C24 C25 C26 114.2(3) . . ? 
C24 C25 Cl2 109.5(2) . . ? 
C26 C25 Cl2 108.8(3) . . ? 
C24 C25 H25A 108.1 . . ? 
C26 C25 H25A 108.1 . . ? 
Cl2 C25 H25A 108.1 . . ? 
C27 C26 C25 113.2(3) . . ? 
C27 C26 H26A 108.9 . . ? 
C25 C26 H26A 108.9 . . ? 
C27 C26 H26B 108.9 . . ? 
C25 C26 H26B 108.9 . . ? 
H26A C26 H26B 107.7 . . ? 
O28 C27 N29 123.5(3) . . ? 
O28 C27 C26 121.4(3) . . ? 
N29 C27 C26 115.2(3) . . ? 
C27 N29 C30 122.7(3) . . ? 
C27 N29 H29 118(3) . . ? 
C30 N29 H29 120(3) . . ? 
N29 C30 C31 115.0(3) . . ? 
N29 C30 H30A 108.5 . . ? 
C31 C30 H30A 108.5 . . ? 
N29 C30 H30B 108.5 . . ? 
C31 C30 H30B 108.5 . . ? 
H30A C30 H30B 107.5 . . ? 
C36 C31 C32 117.2(4) . . ? 
C36 C31 C30 119.2(4) . . ? 
C32 C31 C30 123.5(3) . . ? 
C33 C32 C31 121.1(4) . . ? 
C33 C32 H32A 119.4 . . ? 
C31 C32 H32A 119.4 . . ? 
C34 C33 C32 120.7(5) . . ? 
C34 C33 H33A 119.6 . . ? 
C32 C33 H33A 119.6 . . ? 
C33 C34 C35 119.0(5) . . ? 
C33 C34 H34A 120.5 . . ? 
C35 C34 H34A 120.5 . . ? 
C34 C35 C36 121.2(5) . . ? 
C34 C35 H35A 119.4 . . ? 
C36 C35 H35A 119.4 . . ? 
C31 C36 C35 120.8(5) . . ? 
C31 C36 H36A 119.6 . . ? 
C35 C36 H36A 119.6 . . ? 
  
loop_ 
 _geom_torsion_atom_site_label_1 
 _geom_torsion_atom_site_label_2 
 _geom_torsion_atom_site_label_3 
 _geom_torsion_atom_site_label_4 
 _geom_torsion 
 _geom_torsion_site_symmetry_1 
 _geom_torsion_site_symmetry_2 
 _geom_torsion_site_symmetry_3 
 _geom_torsion_site_symmetry_4 
 _geom_torsion_publ_flag 
C6 C1 C2 C3 0.2(7) . . . . ? 
C1 C2 C3 C4 -0.4(7) . . . . ? 
C2 C3 C4 C5 0.0(7) . . . . ? 
C3 C4 C5 C6 0.6(6) . . . . ? 
C2 C1 C6 C5 0.3(6) . . . . ? 
C2 C1 C6 C7 -179.2(4) . . . . ? 
C4 C5 C6 C1 -0.7(6) . . . . ? 
C4 C5 C6 C7 178.8(3) . . . . ? 
C1 C6 C7 C8 -46.3(5) . . . . ? 
C5 C6 C7 C8 134.3(3) . . . . ? 
C1 C6 C7 Cl1 75.0(4) . . . . ? 
C5 C6 C7 Cl1 -104.4(3) . . . . ? 
C6 C7 C8 C9 174.4(3) . . . . ? 
Cl1 C7 C8 C9 53.2(3) . . . . ? 
C7 C8 C9 O10 -114.4(4) . . . . ? 
C7 C8 C9 N11 66.1(4) . . . . ? 
O10 C9 N11 C12 -4.3(5) . . . . ? 
C8 C9 N11 C12 175.1(3) . . . . ? 
C9 N11 C12 C13B 95.1(5) . . . . ? 
C9 N11 C12 C13A 85.1(5) . . . . ? 
N11 C12 C13A C14A 10.3(6) . . . . ? 
N11 C12 C13A C18A -169.8(4) . . . . ? 
C18A C13A C14A C15A 0.0 . . . . ? 
C12 C13A C14A C15A 180.0(6) . . . . ? 
C13A C14A C15A C16A 0.0 . . . . ? 
C14A C15A C16A C17A 0.0 . . . . ? 
C15A C16A C17A C18A 0.0 . . . . ? 
C16A C17A C18A C13A 0.0 . . . . ? 
C14A C13A C18A C17A 0.0 . . . . ? 
C12 C13A C18A C17A -180.0(5) . . . . ? 
N11 C12 C13B C14B -21.4(6) . . . . ? 
N11 C12 C13B C18B 159.3(4) . . . . ? 
C18B C13B C14B C15B 0.0 . . . . ? 
C12 C13B C14B C15B -179.3(6) . . . . ? 
C13B C14B C15B C16B 0.0 . . . . ? 
C14B C15B C16B C17B 0.0 . . . . ? 
C15B C16B C17B C18B 0.0 . . . . ? 
C16B C17B C18B C13B 0.0 . . . . ? 
C14B C13B C18B C17B 0.0 . . . . ? 
C12 C13B C18B C17B 179.4(6) . . . . ? 
C24 C19 C20 C21 1.1(9) . . . . ? 
C19 C20 C21 C22 -1.1(11) . . . . ? 
C20 C21 C22 C23 1.0(10) . . . . ? 
C21 C22 C23 C24 -0.9(8) . . . . ? 
C20 C19 C24 C23 -0.9(7) . . . . ? 
C20 C19 C24 C25 -179.1(5) . . . . ? 
C22 C23 C24 C19 0.8(7) . . . . ? 
C22 C23 C24 C25 178.9(4) . . . . ? 
C19 C24 C25 C26 118.5(4) . . . . ? 
C23 C24 C25 C26 -59.6(5) . . . . ? 
C19 C24 C25 Cl2 -119.2(4) . . . . ? 
C23 C24 C25 Cl2 62.6(4) . . . . ? 
C24 C25 C26 C27 178.1(3) . . . . ? 
Cl2 C25 C26 C27 55.5(4) . . . . ? 
C25 C26 C27 O28 43.9(5) . . . . ? 
C25 C26 C27 N29 -136.9(3) . . . . ? 
O28 C27 N29 C30 4.2(6) . . . . ? 
C26 C27 N29 C30 -174.9(3) . . . . ? 
C27 N29 C30 C31 -94.2(5) . . . . ? 
N29 C30 C31 C36 -168.1(4) . . . . ? 
N29 C30 C31 C32 14.8(5) . . . . ? 
C36 C31 C32 C33 0.0(6) . . . . ? 
C30 C31 C32 C33 177.2(4) . . . . ? 
C31 C32 C33 C34 1.0(7) . . . . ? 
C32 C33 C34 C35 -0.9(9) . . . . ? 
C33 C34 C35 C36 -0.2(12) . . . . ? 
C32 C31 C36 C35 -1.2(9) . . . . ? 
C30 C31 C36 C35 -178.5(6) . . . . ? 
C34 C35 C36 C31 1.3(12) . . . . ? 
  
loop_ 
 _geom_hbond_atom_site_label_D 
 _geom_hbond_atom_site_label_H 
 _geom_hbond_atom_site_label_A 
 _geom_hbond_distance_DH 
 _geom_hbond_distance_HA 
 _geom_hbond_distance_DA 
 _geom_hbond_angle_DHA 
 _geom_hbond_site_symmetry_A 
C7 H7A O28  0.99 2.53 3.335(4) 138 . 
N11 H11 O28  0.892(14) 1.980(16) 2.866(4) 172(4) . 
C26 H26B O10  0.98 2.50 3.351(5) 145 1_556 
N29 H29 O10  0.887(14) 1.996(16) 2.877(4) 172(4) 1_556 
  
_refine_diff_density_max    0.401 
_refine_diff_density_min   -0.315 
_refine_diff_density_rms    0.041 
  
_shelx_res_file 
; 
  
    tcd354.res created by SHELXL-2014/7 
  
  
TITL tcd354_b.res in C2 
CELL  1.54178  28.4985  11.4777   9.0995   90.000  103.188   90.000 
ZERR    8.000   0.0009   0.0004   0.0003    0.000    0.001    0.000 
LATT -7 
SYMM -X, Y, -Z 
SFAC C  H  N  O  Cl 
UNIT 128  128  8  8  8 
L.S. 10 
BOND $H 
FMAP 2 
PLAN 20 
CONF 
HTAB 
WPDB 
ACTA 
  
HTAB C7 O28 
HTAB C8 Cl2 
HTAB N11 O28 
EQIV $1 x, y, z+1 
HTAB C26 O10_$1 
HTAB N29 O10_$1 
  
EADP c13a > c18a 
EADP c13b > C18b 
DFIX 0.9 0.01 n11 h11 n29 h29 
SIZE 0.08 0.23 0.32 
TWIN 
TEMP -58.140 
  
WGHT    0.062600    1.715900 
BASF   0.05740 
FVAR       0.08748   0.51220 
C1    1    0.881407    0.431897    0.602635    11.00000    0.05670    0.06021 = 
         0.04500    0.00845    0.00982   -0.00531 
AFIX  43 
H1A   2    0.873202    0.482399    0.519392    11.00000   -1.20000 
AFIX   0 
CL1   5    0.778452    0.312462    0.407408    11.00000    0.05899    0.03478 = 
         0.03526   -0.00584    0.00690   -0.00114 
C2    1    0.929354    0.412931    0.670010    11.00000    0.05092    0.08340 = 
         0.06390   -0.00501    0.01627   -0.01501 
AFIX  43 
H2A   2    0.953472    0.450764    0.632600    11.00000   -1.20000 
AFIX   0 
CL2   5    0.784591    0.695513    0.924462    11.00000    0.06969    0.03875 = 
         0.05214    0.01050    0.00123    0.00587 
C3    1    0.941983    0.338992    0.791525    11.00000    0.05125    0.07104 = 
         0.06039   -0.00899    0.00097    0.00647 
AFIX  43 
H3A   2    0.974638    0.325883    0.836837    11.00000   -1.20000 
AFIX   0 
C4    1    0.906303    0.283917    0.846803    11.00000    0.06453    0.05491 = 
         0.05095    0.00469    0.00246    0.00763 
AFIX  43 
H4A   2    0.914722    0.233242    0.929804    11.00000   -1.20000 
AFIX   0 
C5    1    0.858261    0.303526    0.779787    11.00000    0.05484    0.04087 = 
         0.04209    0.00009    0.00909   -0.00009 
AFIX  43 
H5A   2    0.834189    0.266481    0.818266    11.00000   -1.20000 
AFIX   0 
C6    1    0.845258    0.377395    0.656248    11.00000    0.04925    0.03703 = 
         0.03404   -0.00702    0.01040   -0.00330 
C7    1    0.792710    0.395031    0.584105    11.00000    0.05180    0.03698 = 
         0.02922   -0.00249    0.01107   -0.00286 
AFIX  13 
H7A   2    0.773441    0.362905    0.652449    11.00000   -1.20000 
AFIX   0 
C8    1    0.777797    0.521208    0.549617    11.00000    0.05630    0.03751 = 
         0.03409   -0.00778    0.00840   -0.00347 
AFIX  23 
H8A   2    0.782655    0.564056    0.645057    11.00000   -1.20000 
H8B   2    0.799101    0.555705    0.490775    11.00000   -1.20000 
AFIX   0 
C9    1    0.726259    0.537714    0.464004    11.00000    0.05953    0.02994 = 
         0.03293   -0.00824    0.01077    0.00625 
O10   4    0.716992    0.577467    0.334309    11.00000    0.07080    0.04942 = 
         0.03013    0.00196    0.01168    0.00959 
N11   3    0.692360    0.508294    0.536459    11.00000    0.06242    0.04435 = 
         0.02879   -0.00211    0.00972    0.00230 
H11   2    0.700732    0.487659    0.633468    11.00000   -1.20000 
C12   1    0.641975    0.528828    0.470517    11.00000    0.06028    0.05204 = 
         0.04505   -0.00349    0.01880    0.00941 
AFIX  23 
PART   2 
H12C  2    0.639495    0.594867    0.400899   -21.00000   -1.20000 
H12D  2    0.626278    0.551829    0.551312   -21.00000   -1.20000 
PART   1 
AFIX  23 
H12A  2    0.638946    0.602612    0.414950    21.00000   -1.20000 
H12B  2    0.625010    0.537679    0.552195    21.00000   -1.20000 
AFIX  66 
C13A  1    0.616809    0.432742    0.362948    21.00000    0.05169    0.07986 = 
         0.07069   -0.02056    0.02539   -0.00375 
C14A  1    0.638159    0.325678    0.348902    21.00000    0.05169    0.07986 = 
         0.07069   -0.02056    0.02539   -0.00375 
AFIX  43 
H14A  2    0.669284    0.309550    0.406500    21.00000   -1.20000 
AFIX  65 
C15A  1    0.613485    0.242464    0.249686    21.00000    0.05169    0.07986 = 
         0.07069   -0.02056    0.02539   -0.00375 
AFIX  43 
H15A  2    0.627924    0.170061    0.240188    21.00000   -1.20000 
AFIX  65 
C16A  1    0.567461    0.266313    0.164515    21.00000    0.05169    0.07986 = 
         0.07069   -0.02056    0.02539   -0.00375 
AFIX  43 
H16A  2    0.550775    0.210038    0.097419    21.00000   -1.20000 
AFIX  65 
C17A  1    0.546111    0.373377    0.178560    21.00000    0.05169    0.07986 = 
         0.07069   -0.02056    0.02539   -0.00375 
AFIX  43 
H17A  2    0.514986    0.389504    0.120962    21.00000   -1.20000 
AFIX  65 
C18A  1    0.570784    0.456592    0.277775    21.00000    0.05169    0.07986 = 
         0.07069   -0.02056    0.02539   -0.00375 
AFIX  43 
H18A  2    0.556346    0.528995    0.287273    21.00000   -1.20000 
AFIX  66 
PART   2 
C13B  1    0.614421    0.428292    0.386583   -21.00000    0.05991    0.04961 = 
         0.06869    0.00834    0.00214   -0.00246 
C14B  1    0.636891    0.336788    0.329711   -21.00000    0.05991    0.04961 = 
         0.06869    0.00834    0.00214   -0.00246 
AFIX  43 
H14B  2    0.670616    0.335851    0.344105   -21.00000   -1.20000 
AFIX  65 
C15B  1    0.609489    0.246668    0.251554   -21.00000    0.05991    0.04961 = 
         0.06869    0.00834    0.00214   -0.00246 
AFIX  43 
H15B  2    0.624684    0.184788    0.213094   -21.00000   -1.20000 
AFIX  65 
C16B  1    0.559618    0.248053    0.230269   -21.00000    0.05991    0.04961 = 
         0.06869    0.00834    0.00214   -0.00246 
AFIX  43 
H16B  2    0.541088    0.187108    0.177415   -21.00000   -1.20000 
AFIX  65 
C17B  1    0.537149    0.339556    0.287140   -21.00000    0.05991    0.04961 = 
         0.06869    0.00834    0.00214   -0.00246 
AFIX  43 
H17B  2    0.503423    0.340492    0.272745   -21.00000   -1.20000 
AFIX  65 
C18B  1    0.564550    0.429676    0.365297   -21.00000    0.05991    0.04961 = 
         0.06869    0.00834    0.00214   -0.00246 
AFIX  43 
H18B  2    0.549354    0.491557    0.403757   -21.00000   -1.20000 
AFIX   0 
PART   0 
C19   1    0.902453    0.545775    1.081348    11.00000    0.06267    0.06272 = 
         0.05940   -0.00124    0.00212    0.01252 
AFIX  43 
H19A  2    0.900829    0.499208    0.995354    11.00000   -1.20000 
AFIX   0 
C20   1    0.946583    0.568562    1.176242    11.00000    0.06359    0.10855 = 
         0.08099   -0.00585   -0.00475    0.02294 
AFIX  43 
H20A  2    0.974908    0.538757    1.154080    11.00000   -1.20000 
AFIX   0 
C21   1    0.949007    0.635136    1.303583    11.00000    0.08062    0.12468 = 
         0.06590    0.00635   -0.01980   -0.00075 
AFIX  43 
H21A  2    0.979021    0.649634    1.369310    11.00000   -1.20000 
AFIX   0 
C22   1    0.907973    0.680286    1.334952    11.00000    0.09610    0.08689 = 
         0.04519   -0.00492    0.00143   -0.01701 
AFIX  43 
H22A  2    0.909888    0.726704    1.421228    11.00000   -1.20000 
AFIX   0 
C23   1    0.863535    0.657641    1.239566    11.00000    0.07955    0.06144 = 
         0.04380   -0.00119    0.01273   -0.00566 
AFIX  43 
H23A  2    0.835302    0.687823    1.261944    11.00000   -1.20000 
AFIX   0 
C24   1    0.860737    0.590381    1.110988    11.00000    0.05948    0.03834 = 
         0.03845    0.00989    0.00762    0.00248 
C25   1    0.813425    0.561930    1.005972    11.00000    0.05794    0.03564 = 
         0.03252    0.00437    0.01065    0.00689 
AFIX  13 
H25A  2    0.819970    0.513374    0.922970    11.00000   -1.20000 
AFIX   0 
C26   1    0.778794    0.496038    1.079263    11.00000    0.05569    0.05437 = 
         0.03611    0.00982    0.01058    0.00386 
AFIX  23 
H26A  2    0.793583    0.421879    1.118383    11.00000   -1.20000 
H26B  2    0.773321    0.541342    1.165102    11.00000   -1.20000 
AFIX   0 
C27   1    0.730977    0.471861    0.972976    11.00000    0.05748    0.03825 = 
         0.02914    0.00582    0.01174    0.00365 
O28   4    0.728480    0.437229    0.843377    11.00000    0.07174    0.05424 = 
         0.03234    0.00068    0.01643    0.00164 
N29   3    0.692557    0.489242    1.030387    11.00000    0.05276    0.04576 = 
         0.03489   -0.00234    0.01175   -0.00217 
H29   2    0.697452    0.519867    1.122081    11.00000   -1.20000 
C30   1    0.644330    0.461701    0.949192    11.00000    0.05647    0.04793 = 
         0.05307   -0.00003    0.01675   -0.00900 
AFIX  23 
H30A  2    0.626218    0.432922    1.021285    11.00000   -1.20000 
H30B  2    0.645964    0.398300    0.878397    11.00000   -1.20000 
AFIX   0 
C31   1    0.616709    0.562178    0.861902    11.00000    0.04536    0.04725 = 
         0.04493   -0.00923    0.01479   -0.00464 
C32   1    0.638155    0.663947    0.830915    11.00000    0.04737    0.04581 = 
         0.04651   -0.00269    0.01434   -0.00051 
AFIX  43 
H32A  2    0.671442    0.674407    0.868647    11.00000   -1.20000 
AFIX   0 
C33   1    0.611672    0.750589    0.745638    11.00000    0.05804    0.05195 = 
         0.06756    0.00632    0.01462    0.00696 
AFIX  43 
H33A  2    0.627167    0.818805    0.724532    11.00000   -1.20000 
AFIX   0 
C34   1    0.563854    0.738763    0.692133    11.00000    0.05857    0.07902 = 
         0.10307    0.01485    0.00718    0.01239 
AFIX  43 
H34A  2    0.545793    0.798601    0.635165    11.00000   -1.20000 
AFIX   0 
C35   1    0.542240    0.639720    0.721509    11.00000    0.04227    0.10850 = 
         0.14014    0.02114   -0.00437   -0.00849 
AFIX  43 
H35A  2    0.508822    0.630970    0.684749    11.00000   -1.20000 
AFIX   0 
C36   1    0.568267    0.551098    0.804456    11.00000    0.04960    0.07648 = 
         0.11814    0.01142    0.01191   -0.01722 
AFIX  43 
H36A  2    0.552503    0.482223    0.821707    11.00000   -1.20000 
  
AFIX   0 
HKLF 4 
  
REM  tcd354_b.res in C2 
REM R1 =  0.0423 for    5071 Fo > 4sig(Fo)  and  0.0438 for all    5295 data 
REM    321 parameters refined using      3 restraints 
  
END 
  
WGHT      0.0625      1.7360 
  
REM Instructions for potential hydrogen bonds 
HTAB C7 O28 
HTAB C8 Cl2 
HTAB N11 O28 
HTAB C26 O10_$1 
HTAB N29 O10_$1 
  
REM Highest difference peak  0.401,  deepest hole -0.315,  1-sigma level  0.041 
Q1    1   0.5414  0.3148  0.2159  11.00000  0.05    0.31 
Q2    1   0.5891  0.2663  0.2191  11.00000  0.05    0.29 
Q3    1   0.7778  0.7171  1.0127  11.00000  0.05    0.24 
Q4    1   0.5538  0.3195  0.1368  11.00000  0.05    0.19 
Q5    1   0.8591  0.4326  0.6519  11.00000  0.05    0.19 
Q6    1   0.5282  0.3256  0.3537  11.00000  0.05    0.18 
Q7    1   0.7500  0.3537  0.3643  11.00000  0.05    0.18 
Q8    1   0.8217  0.3819  0.6181  11.00000  0.05    0.18 
Q9    1   0.7427  0.3220  0.3744  11.00000  0.05    0.18 
Q10   1   0.7911  0.4562  0.5742  11.00000  0.05    0.17 
Q11   1   0.5576  0.4033  0.2909  11.00000  0.05    0.17 
Q12   1   0.5884  0.4786  0.2634  11.00000  0.05    0.16 
Q13   1   0.5592  0.4183  0.4274  11.00000  0.05    0.16 
Q14   1   0.5472  0.4228  0.1365  11.00000  0.05    0.16 
Q15   1   0.7802  0.3083  0.5149  11.00000  0.05    0.16 
Q16   1   0.5574  0.6815  0.6301  11.00000  0.05    0.16 
Q17   1   0.7963  0.5574  1.0811  11.00000  0.05    0.16 
Q18   1   0.6991  0.4792  0.7899  11.00000  0.05    0.15 
Q19   1   0.6289  0.6040  0.8457  11.00000  0.05    0.15 
Q20   1   0.8091  0.3533  0.4253  11.00000  0.05    0.15 
; 
_shelx_res_checksum   13457 
  
_shelx_hkl_file 
; 
   2   0   0  236.86   14.19 
  -2   0   0  234.48   14.14 
   4   0   0   32.32    1.94 
  -4   0   0   33.99    1.95 
   6   0   0  185.08   10.64 
  -6   0   0  180.76   10.71 
  -6   0   0  182.98   10.61 
   6   0   0  178.14   10.67 
  -8   0   0    3.03    0.20 
  -8   0   0    3.28    0.20 
   8   0   0    2.88    0.21 
   8   0   0    3.40    0.20 
   8   0   0    3.09    0.19 
  -8   0   0    2.90    0.23 
  10   0   0    1.70    0.14 
 -10   0   0    1.67    0.13 
 -10   0   0    1.61    0.15 
 -10   0   0    1.70    0.12 
  10   0   0    1.69    0.11 
 -10   0   0    1.71    0.12 
  10   0   0    1.43    0.12 
  10   0   0    1.54    0.12 
 -12   0   0  243.14   14.52 
 -12   0   0  268.28   14.56 
  12   0   0  231.19   14.53 
 -12   0   0  222.99   14.52 
  12   0   0  270.46   14.60 
 -12   0   0  250.82   14.51 
 -12   0   0  258.31   14.51 
  12   0   0  252.53   14.52 
 -14   0   0  140.92    8.14 
  14   0   0  142.33    8.07 
 -14   0   0  137.54    8.09 
  14   0   0  145.64    8.11 
 -14   0   0  142.23    8.07 
  14   0   0  131.88    8.09 
 -14   0   0  130.73    8.08 
 -16   0   0    7.50    0.49 
 -16   0   0    6.96    0.46 
 -16   0   0    8.00    0.55 
  16   0   0    8.20    0.52 
  16   0   0    7.68    0.46 
  16   0   0    6.90    0.49 
  18   0   0   27.77    1.72 
 -18   0   0   26.94    1.71 
  18   0   0   29.38    1.69 
  18   0   0   29.90    1.76 
 -18   0   0   28.91    1.79 
  20   0   0    3.67    0.25 
  20   0   0    3.77    0.29 
 -20   0   0    3.65    0.28 
  20   0   0    4.22    0.33 
 -20   0   0    3.63    0.35 
  22   0   0    8.42    0.53 
  22   0   0    7.30    0.56 
 -22   0   0    7.10    0.48 
 -24   0   0   10.00    0.57 
  24   0   0   10.10    0.59 
 -24   0   0    8.09    0.56 
  24   0   0    8.29    0.59 
  24   0   0    8.90    0.60 
 -26   0   0   -0.02    0.05 
  26   0   0   -0.01    0.06 
  26   0   0    0.00    0.05 
 -26   0   0   -0.03    0.05 
  26   0   0    0.03    0.06 
  28   0   0    3.01    0.23 
  28   0   0    2.56    0.22 
 -28   0   0    2.58    0.20 
  30   0   0    0.92    0.13 
  30   0   0    1.20    0.13 
 -30   0   0    1.03    0.11 
  32   0   0    0.65    0.09 
 -32   0   0    0.80    0.08 
   1  -1   0    0.17    0.03 
  -1  -1   0    0.15    0.03 
  -1   1   0    0.13    0.03 
  -3  -1   0    4.28    0.26 
   3   1   0    3.96    0.26 
  -5  -1   0    0.99    0.09 
   5   1   0    0.99    0.09 
  -5   1   0    1.18    0.10 
   7  -1   0    9.75    0.57 
  -7  -1   0    8.86    0.57 
   7  -1   0    8.79    0.54 
  -7  -1   0    9.38    0.57 
  -7  -1   0   10.38    0.56 
  -7  -1   0    8.53    0.54 
  -7  -1   0    9.76    0.55 
  -7   1   0    9.27    0.58 
   7   1   0    8.70    0.55 
   7   1   0    8.49    0.56 
  -7   1   0    8.75    0.54 
   7   1   0    9.08    0.56 
  -7   1   0    8.75    0.55 
  -9  -1   0    0.64    0.05 
   9  -1   0    0.62    0.05 
  -9  -1   0    0.76    0.08 
  -9  -1   0    0.54    0.08 
   9  -1   0    0.74    0.07 
  -9  -1   0    0.67    0.07 
  -9  -1   0    0.70    0.07 
   9  -1   0    0.55    0.08 
   9   1   0    0.51    0.07 
  -9   1   0    0.60    0.06 
  -9   1   0    0.65    0.09 
   9   1   0    0.46    0.06 
 -11  -1   0    2.50    0.22 
  11  -1   0    2.96    0.20 
 -11  -1   0    2.98    0.19 
  11  -1   0    2.85    0.19 
 -11  -1   0    2.78    0.19 
  11  -1   0    2.82    0.17 
 -11  -1   0    2.72    0.16 
  11  -1   0    2.56    0.21 
  11   1   0    2.19    0.17 
 -11   1   0    2.07    0.21 
 -11   1   0    2.32    0.18 
  13  -1   0    7.61    0.48 
 -13  -1   0    6.35    0.46 
 -13  -1   0    6.89    0.44 
  13  -1   0    6.51    0.45 
  13  -1   0    7.20    0.43 
 -13  -1   0    7.55    0.45 
 -13  -1   0    6.99    0.49 
 -13   1   0    6.97    0.43 
 -13   1   0    5.94    0.45 
 -13   1   0    7.93    0.50 
  13   1   0    7.21    0.46 
  13   1   0    6.53    0.43 
  15  -1   0    2.37    0.20 
  15  -1   0    2.59    0.23 
  15  -1   0    2.54    0.17 
 -15  -1   0    2.38    0.27 
 -15  -1   0    2.45    0.24 
 -15  -1   0    2.57    0.20 
 -15  -1   0    2.31    0.19 
  15   1   0    2.90    0.18 
  15   1   0    2.49    0.20 
 -15   1   0    2.61    0.21 
 -15   1   0    2.98    0.18 
 -17  -1   0    2.75    0.19 
  17  -1   0    2.69    0.17 
  17  -1   0    2.82    0.24 
  17  -1   0    2.96    0.22 
  17   1   0    2.60    0.22 
 -17   1   0    2.31    0.25 
 -17   1   0    2.31    0.18 
 -17   1   0    2.24    0.21 
  17   1   0    2.32    0.17 
  17   1   0    2.17    0.20 
  19  -1   0    8.40    0.56 
 -19  -1   0    7.32    0.48 
 -19   1   0    7.79    0.52 
 -19   1   0    6.95    0.46 
 -19   1   0    6.76    0.56 
  19   1   0    7.56    0.51 
  19   1   0    7.73    0.47 
  19   1   0    7.97    0.54 
  21  -1   0    2.50    0.25 
  21   1   0    2.08    0.23 
 -21   1   0    2.53    0.22 
  21   1   0    2.64    0.22 
 -21   1   0    1.89    0.25 
  21   1   0    2.36    0.17 
  23  -1   0    3.26    0.33 
  23  -1   0    2.90    0.28 
  23  -1   0    2.89    0.31 
  23  -1   0    3.90    0.27 
 -23  -1   0    3.40    0.27 
 -23  -1   0    3.64    0.29 
 -23  -1   0    3.19    0.24 
  23  -1   0    4.06    0.28 
  23   1   0    3.83    0.28 
 -23   1   0    3.15    0.25 
  23   1   0    3.38    0.26 
  23   1   0    3.00    0.34 
 -23   1   0    3.51    0.24 
  23   1   0    3.33    0.24 
 -23   1   0    2.93    0.41 
  25  -1   0    1.61    0.19 
 -25  -1   0    2.05    0.21 
 -25  -1   0    1.90    0.17 
 -25  -1   0    1.79    0.17 
  25  -1   0    2.57    0.20 
 -25   1   0    1.94    0.17 
 -25   1   0    2.25    0.17 
  25   1   0    1.75    0.18 
  25   1   0    2.53    0.20 
  27  -1   0    0.88    0.13 
  27  -1   0    0.95    0.13 
 -27  -1   0    1.09    0.11 
  27   1   0    0.72    0.11 
 -27   1   0    0.73    0.10 
 -27   1   0    0.74    0.10 
  27   1   0    0.74    0.11 
  29  -1   0    0.50    0.09 
 -29  -1   0    0.43    0.07 
  29  -1   0    0.47    0.09 
 -29   1   0    0.53    0.08 
  29   1   0    0.53    0.09 
  29   1   0    0.50    0.09 
  31  -1   0    0.23    0.06 
 -31  -1   0    0.30    0.06 
  31  -1   0    0.27    0.06 
  31   1   0    0.30    0.06 
  31   1   0    0.26    0.06 
 -31   1   0    0.25    0.05 
  33  -1   0    0.25    0.05 
  33  -1   0    0.41    0.06 
 -33  -1   0    0.36    0.05 
 -33   1   0    0.35    0.05 
   0  -2   0   71.33    4.01 
   0   2   0   63.41    3.96 
  -2  -2   0   93.05    5.57 
   2  -2   0   94.05    5.53 
  -4  -2   0    8.73    0.56 
  -4  -2   0   10.36    0.56 
   4  -2   0    9.66    0.54 
  -4  -2   0    7.85    0.56 
   4  -2   0    8.31    0.55 
  -4  -2   0    8.20    0.54 
  -4   2   0    8.64    0.55 
   4   2   0    9.93    0.58 
   4   2   0    9.44    0.53 
  -6  -2   0    5.29    0.36 
  -6  -2   0    5.44    0.35 
   6  -2   0    5.56    0.36 
   6  -2   0    5.31    0.33 
  -6  -2   0    5.84    0.36 
  -6  -2   0    5.12    0.36 
   6  -2   0    5.04    0.35 
   6   2   0    5.90    0.34 
  -6   2   0    6.00    0.37 
   6   2   0    5.88    0.35 
   8  -2   0    4.05    0.27 
   8  -2   0    3.44    0.24 
  -8  -2   0    3.76    0.26 
  -8  -2   0    3.33    0.26 
  -8  -2   0    3.68    0.25 
  -8  -2   0    3.88    0.25 
  -8  -2   0    3.71    0.26 
   8   2   0    3.83    0.25 
  -8   2   0    3.16    0.23 
   8   2   0    3.43    0.23 
  -8   2   0    3.72    0.27 
 -10  -2   0    3.86    0.27 
 -10  -2   0    3.98    0.29 
  10  -2   0    3.71    0.26 
 -10  -2   0    4.17    0.28 
 -10  -2   0    4.26    0.29 
  10  -2   0    4.46    0.30 
 -10  -2   0    4.49    0.27 
  10  -2   0    3.96    0.27 
  10   2   0    4.49    0.28 
 -10   2   0    3.66    0.29 
 -10   2   0    3.22    0.26 
  10   2   0    3.38    0.26 
 -10   2   0    3.34    0.25 
 -12  -2   0    3.61    0.25 
 -12   2   0    3.74    0.28 
  12   2   0    3.08    0.23 
  12   2   0    3.38    0.25 
 -12   2   0    3.24    0.24 
 -12   2   0    3.36    0.22 
  12   2   0    2.99    0.21 
  14   2   0    1.32    0.11 
  14   2   0    1.15    0.12 
 -14   2   0    1.43    0.17 
  14   2   0    1.41    0.14 
 -14   2   0    1.43    0.12 
 -14   2   0    1.29    0.14 
  16  -2   0   10.10    0.64 
 -16  -2   0   10.36    0.65 
  16  -2   0   10.24    0.70 
 -16  -2   0    9.60    0.67 
  16   2   0   11.91    0.68 
  16   2   0    9.71    0.62 
 -16   2   0    9.08    0.66 
 -16   2   0    9.76    0.63 
 -16   2   0   11.02    0.72 
  18  -2   0    4.77    0.34 
  18  -2   0    4.51    0.40 
 -18   2   0    5.15    0.37 
  18   2   0    4.74    0.36 
  18   2   0    5.41    0.38 
 -18   2   0    5.14    0.42 
 -18   2   0    5.26    0.33 
  18   2   0    5.06    0.33 
  20  -2   0    0.78    0.15 
  20   2   0    1.15    0.15 
  20   2   0    1.06    0.10 
 -20   2   0    1.01    0.17 
 -20   2   0    0.90    0.14 
 -20   2   0    0.96    0.10 
  20   2   0    0.86    0.13 
  22  -2   0    1.72    0.22 
  22   2   0    1.64    0.18 
  22   2   0    1.60    0.14 
 -22   2   0    1.22    0.21 
  22   2   0    1.69    0.20 
 -22   2   0    1.90    0.19 
 -24  -2   0    1.91    0.19 
  24  -2   0    1.86    0.20 
  24  -2   0    2.23    0.21 
 -24  -2   0    2.17    0.19 
 -24   2   0    2.40    0.21 
  24   2   0    2.01    0.23 
 -24   2   0    2.40    0.18 
 -24   2   0    2.37    0.18 
  24   2   0    2.38    0.20 
  24   2   0    2.39    0.23 
  26  -2   0    5.42    0.40 
  26  -2   0    6.15    0.41 
 -26  -2   0    5.94    0.38 
 -26  -2   0    5.49    0.38 
  26   2   0    5.87    0.40 
  26   2   0    5.09    0.41 
 -26   2   0    5.76    0.38 
 -26   2   0    6.24    0.38 
  26   2   0    5.83    0.45 
  28  -2   0    1.49    0.15 
 -28  -2   0    1.09    0.14 
  28  -2   0    1.14    0.14 
 -28  -2   0    1.38    0.13 
  28   2   0    1.27    0.14 
 -28   2   0    1.31    0.12 
 -28   2   0    1.41    0.13 
  30  -2   0    0.22    0.07 
  30  -2   0    0.13    0.06 
 -30  -2   0    0.12    0.05 
  30   2   0    0.12    0.06 
 -30   2   0    0.18    0.05 
  32  -2   0    0.05    0.04 
  32  -2   0    0.08    0.04 
 -32  -2   0    0.06    0.04 
  32   2   0    0.06    0.04 
 -32   2   0    0.10    0.04 
   1  -3   0   63.61    4.08 
  -1  -3   0   69.35    4.08 
   1  -3   0   69.71    4.08 
  -1  -3   0   77.89    4.16 
  -1  -3   0   63.07    4.09 
  -1  -3   0   70.73    4.08 
   1  -3   0   75.64    4.08 
  -1   3   0   65.00    4.07 
   1   3   0   70.85    4.06 
  -1   3   0   71.66    4.07 
  -3  -3   0  133.51    7.77 
   3  -3   0  135.80    7.67 
  -3  -3   0  131.35    7.73 
  -3  -3   0  132.21    7.65 
  -3  -3   0  129.36    7.69 
   3  -3   0  129.06    7.68 
   3  -3   0  132.91    7.70 
  -3  -3   0  125.08    7.64 
  -3   3   0  137.51    7.66 
  -3   3   0  127.56    7.67 
   3   3   0  123.01    7.61 
  -5  -3   0   39.20    2.40 
  -5  -3   0   43.68    2.40 
   5  -3   0   40.63    2.40 
  -5  -3   0   37.36    2.37 
  -5  -3   0   39.21    2.40 
   5  -3   0   39.82    2.37 
   5  -3   0   39.42    2.38 
  -5   3   0   43.05    2.37 
  -5   3   0   41.46    2.39 
   5   3   0   40.59    2.36 
   7  -3   0   88.35    4.99 
  -7  -3   0   81.86    4.99 
   7  -3   0   80.50    4.95 
   7  -3   0   83.04    4.97 
  -7  -3   0   84.13    4.99 
  -7  -3   0   88.50    4.99 
  -7  -3   0   82.26    4.96 
  -7   3   0   86.78    4.99 
  -7   3   0   90.38    4.96 
   7   3   0   86.02    4.95 
   7   3   0   83.19    4.97 
  -9  -3   0   30.00    1.82 
   9  -3   0   28.91    1.80 
   9  -3   0   31.45    1.83 
  -9  -3   0   29.33    1.82 
  -9  -3   0   28.61    1.82 
  -9  -3   0   30.78    1.80 
   9   3   0   31.87    1.78 
  -9   3   0   27.46    1.78 
   9   3   0   32.34    1.81 
  -9   3   0   30.56    1.83 
  -9   3   0   31.60    1.80 
  11  -3   0   21.19    1.27 
 -11  -3   0   21.72    1.26 
 -11  -3   0   20.53    1.26 
 -11  -3   0   17.06    1.24 
 -11  -3   0   21.73    1.23 
  11  -3   0   19.96    1.24 
 -11   3   0   19.51    1.21 
  11   3   0   20.25    1.22 
 -11   3   0   20.79    1.23 
 -11   3   0   20.04    1.27 
  11   3   0   21.07    1.24 
 -13  -3   0   14.72    0.97 
 -13  -3   0   15.75    0.98 
  13  -3   0   15.38    1.00 
 -13  -3   0   16.39    0.95 
 -13   3   0   15.11    0.93 
  13   3   0   14.46    0.94 
  13   3   0   16.05    0.96 
 -13   3   0   16.65    1.01 
 -13   3   0   13.89    0.95 
 -15  -3   0    6.70    0.41 
  15  -3   0    5.79    0.45 
 -15  -3   0    6.71    0.44 
  15   3   0    5.29    0.39 
 -15   3   0    5.94    0.38 
  15   3   0    4.92    0.39 
 -15   3   0    5.66    0.45 
  15   3   0    5.91    0.41 
  15   3   0    5.35    0.36 
 -17  -3   0    2.11    0.22 
  17  -3   0    2.05    0.23 
  17   3   0    2.12    0.20 
 -17   3   0    2.24    0.17 
 -17   3   0    2.27    0.21 
 -17   3   0    1.92    0.23 
  17   3   0    2.11    0.16 
  17   3   0    1.85    0.19 
 -19  -3   0    2.68    0.28 
  19  -3   0    2.83    0.31 
 -19   3   0    3.52    0.24 
  19   3   0    3.22    0.23 
 -19   3   0    3.64    0.29 
  19   3   0    3.63    0.29 
 -19   3   0    3.38    0.33 
  19   3   0    3.26    0.23 
  21  -3   0    9.43    0.75 
 -21   3   0   10.89    0.65 
 -21   3   0   11.28    0.71 
 -21   3   0    9.00    0.76 
  21   3   0   10.64    0.64 
  21   3   0   10.53    0.71 
  23  -3   0    0.13    0.07 
 -23  -3   0    0.04    0.06 
  23  -3   0    0.02    0.07 
 -23  -3   0    0.02    0.06 
 -23   3   0    0.09    0.09 
  23   3   0    0.18    0.07 
 -23   3   0    0.06    0.06 
 -23   3   0    0.10    0.05 
  23   3   0    0.03    0.07 
  23   3   0    0.11    0.04 
 -25  -3   0    3.81    0.25 
  25  -3   0    3.22    0.26 
 -25  -3   0    3.21    0.24 
  25   3   0    3.27    0.25 
 -25   3   0    2.60    0.23 
 -25   3   0    3.23    0.23 
  27  -3   0    0.72    0.11 
 -27  -3   0    0.71    0.10 
  27  -3   0    0.94    0.13 
 -27  -3   0    0.69    0.10 
 -27   3   0    0.78    0.10 
  27   3   0    1.00    0.12 
 -27   3   0    1.00    0.10 
  29  -3   0    1.64    0.15 
 -29  -3   0    1.23    0.13 
 -29  -3   0    1.41    0.13 
  29  -3   0    1.34    0.15 
 -29   3   0    1.48    0.12 
  29   3   0    1.48    0.14 
 -29   3   0    1.29    0.12 
  31  -3   0    0.16    0.06 
  31  -3   0    0.24    0.06 
 -31  -3   0    0.25    0.05 
  31   3   0    0.22    0.06 
 -31   3   0    0.21    0.05 
   0  -4   0   49.23    2.78 
   0  -4   0   50.09    2.80 
   0  -4   0   44.95    2.80 
   0  -4   0   46.24    2.78 
   0   4   0   47.66    2.75 
   0   4   0   45.01    2.77 
  -2  -4   0   32.61    1.98 
   2  -4   0   33.45    2.00 
  -2  -4   0   35.60    2.02 
  -2  -4   0   34.41    2.01 
   2  -4   0   35.06    2.00 
   2  -4   0   31.33    2.01 
  -2  -4   0   35.31    2.01 
   2  -4   0   30.39    1.98 
  -2  -4   0   34.96    2.00 
  -2   4   0   34.70    1.97 
  -2   4   0   33.04    1.99 
   2   4   0   33.76    1.97 
  -4  -4   0    0.96    0.10 
   4  -4   0    0.99    0.11 
  -4  -4   0    0.88    0.11 
   4  -4   0    0.99    0.10 
  -4  -4   0    0.96    0.11 
  -4  -4   0    0.83    0.09 
   4  -4   0    0.92    0.09 
  -4  -4   0    1.00    0.12 
   4  -4   0    0.81    0.10 
   4   4   0    1.04    0.08 
  -4   4   0    0.95    0.09 
  -4   4   0    1.09    0.08 
   6  -4   0   23.54    1.39 
   6  -4   0   23.57    1.38 
  -6  -4   0   23.01    1.39 
  -6  -4   0   22.72    1.40 
  -6  -4   0   23.94    1.40 
  -6  -4   0   22.58    1.37 
  -6   4   0   22.75    1.36 
   6   4   0   22.28    1.35 
  -6   4   0   21.26    1.38 
   8  -4   0    1.88    0.18 
  -8  -4   0    1.89    0.18 
  -8  -4   0    1.83    0.18 
  -8  -4   0    1.89    0.16 
  -8  -4   0    1.89    0.18 
   8  -4   0    1.85    0.17 
   8   4   0    2.08    0.14 
  -8   4   0    2.10    0.18 
   8   4   0    2.08    0.17 
  -8   4   0    2.12    0.16 
  10  -4   0   39.46    2.42 
 -10  -4   0   41.16    2.41 
 -10  -4   0   40.87    2.45 
  10  -4   0   40.90    2.45 
 -10  -4   0   38.44    2.44 
  10   4   0   41.92    2.39 
  10   4   0   41.41    2.42 
 -10   4   0   41.24    2.41 
 -10   4   0   40.13    2.45 
  12  -4   0    0.74    0.10 
 -12  -4   0    0.59    0.11 
 -12  -4   0    0.73    0.12 
 -12  -4   0    0.60    0.09 
  12  -4   0    0.54    0.11 
  12   4   0    0.56    0.09 
  12   4   0    0.63    0.08 
 -12   4   0    0.55    0.09 
  12   4   0    0.40    0.07 
 -12   4   0    0.49    0.10 
 -12   4   0    0.69    0.09 
 -12   4   0    0.45    0.08 
 -14  -4   0    0.45    0.12 
  14  -4   0    0.25    0.10 
 -14  -4   0    0.28    0.10 
 -14  -4   0    0.30    0.08 
  14   4   0    0.28    0.07 
  14   4   0    0.37    0.09 
  14   4   0    0.25    0.07 
 -14   4   0    0.32    0.08 
 -14   4   0    0.32    0.07 
 -14   4   0    0.28    0.11 
 -14   4   0    0.29    0.07 
  16  -4   0    0.74    0.15 
 -16  -4   0    0.90    0.15 
 -16   4   0    0.87    0.10 
  16   4   0    0.81    0.13 
 -16   4   0    0.83    0.17 
  16   4   0    0.86    0.12 
 -16   4   0    0.85    0.15 
  16   4   0    0.79    0.11 
  18  -4   0    0.74    0.15 
 -18  -4   0    0.77    0.14 
 -18   4   0    0.76    0.15 
  18   4   0    0.78    0.12 
  18   4   0    0.65    0.12 
  18   4   0    0.61    0.08 
  18   4   0    0.70    0.08 
 -18   4   0    0.61    0.10 
 -18   4   0    0.65    0.09 
  20  -4   0    1.15    0.19 
 -20  -4   0    1.13    0.17 
  20   4   0    0.95    0.15 
  20   4   0    1.01    0.11 
 -20   4   0    0.95    0.11 
 -20   4   0    0.97    0.15 
 -20   4   0    0.82    0.17 
  22  -4   0    4.10    0.32 
 -22  -4   0    4.20    0.31 
  22  -4   0    4.69    0.33 
 -22  -4   0    4.25    0.31 
  22   4   0    4.08    0.32 
  22   4   0    4.25    0.28 
 -22   4   0    4.76    0.37 
 -22   4   0    4.55    0.30 
 -22   4   0    4.52    0.30 
  24  -4   0    5.58    0.40 
 -24  -4   0    6.09    0.38 
  24  -4   0    6.41    0.40 
 -24  -4   0    5.86    0.38 
 -24   4   0    4.98    0.42 
  24   4   0    5.37    0.35 
 -24   4   0    6.02    0.37 
  24   4   0    5.55    0.39 
 -24   4   0    5.11    0.37 
  26  -4   0    0.64    0.10 
 -26  -4   0    0.47    0.08 
  26  -4   0    0.55    0.10 
 -26  -4   0    0.63    0.09 
 -26   4   0    0.37    0.07 
 -26   4   0    0.39    0.08 
  26   4   0    0.43    0.09 
 -28  -4   0   -0.01    0.04 
  28  -4   0    0.03    0.05 
  28  -4   0    0.04    0.05 
 -28  -4   0    0.01    0.05 
  28   4   0   -0.03    0.05 
 -28   4   0    0.02    0.04 
 -28   4   0    0.07    0.05 
 -30  -4   0    0.03    0.04 
  30  -4   0    0.03    0.05 
  30  -4   0    0.05    0.05 
 -30   4   0    0.10    0.06 
  30   4   0    0.00    0.04 
 -30   4   0    0.03    0.04 
  32  -4   0    0.53    0.07 
  32  -4   0    0.59    0.07 
  32   4   0    0.50    0.07 
  -1  -5   0    0.49    0.08 
  -1  -5   0    0.52    0.08 
   1  -5   0    0.51    0.09 
   1  -5   0    0.40    0.11 
   1  -5   0    0.56    0.08 
  -1  -5   0    0.58    0.10 
  -1  -5   0    0.52    0.08 
   1  -5   0    0.44    0.08 
  -1   5   0    0.67    0.07 
   1   5   0    0.66    0.06 
  -1   5   0    0.68    0.06 
  -3  -5   0    2.28    0.19 
  -3  -5   0    2.33    0.21 
   3  -5   0    1.94    0.18 
   3  -5   0    2.40    0.19 
  -3  -5   0    2.31    0.18 
   3  -5   0    2.14    0.19 
  -3  -5   0    2.17    0.20 
  -5  -5   0   16.16    1.02 
   5  -5   0   15.96    1.03 
  -5  -5   0   15.49    1.05 
  -5  -5   0   16.55    1.04 
  -5  -5   0   14.74    1.00 
   5   5   0   18.77    0.99 
  -5   5   0   18.24    1.03 
  -7  -5   0   47.64    2.94 
  -7  -5   0   46.40    2.89 
   7  -5   0   48.65    2.92 
  -7  -5   0   48.72    2.93 
   7  -5   0   50.14    2.93 
  -7   5   0   50.81    2.92 
   7   5   0   47.95    2.90 
   7   5   0   49.49    2.87 
  -7   5   0   50.97    2.89 
  -9  -5   0   87.74    5.05 
   9  -5   0   82.74    5.02 
  -9  -5   0   90.41    5.05 
  -9  -5   0   87.50    5.01 
   9  -5   0   88.00    5.05 
  -9   5   0   75.09    4.98 
  -9   5   0   84.62    4.99 
   9   5   0   86.09    5.01 
  -9   5   0   83.97    5.03 
   9   5   0   86.00    4.97 
 -11  -5   0   22.77    1.41 
  11  -5   0   24.98    1.47 
 -11  -5   0   24.77    1.46 
  11  -5   0   21.98    1.43 
 -11  -5   0   23.42    1.46 
  11   5   0   23.56    1.41 
  11   5   0   20.16    1.38 
 -11   5   0   21.20    1.38 
 -11   5   0   23.70    1.40 
 -11   5   0   23.73    1.46 
  11   5   0   24.03    1.38 
 -13  -5   0   13.57    0.90 
 -13  -5   0   12.80    0.90 
  13  -5   0   13.20    0.92 
 -13   5   0   12.61    0.84 
  13   5   0   13.45    0.83 
  13   5   0   14.24    0.86 
 -13   5   0   13.78    0.91 
  13   5   0   13.01    0.83 
 -13   5   0   13.73    0.83 
  15  -5   0   15.51    1.06 
 -15  -5   0   15.52    1.03 
 -15  -5   0   16.01    1.02 
  15   5   0   15.96    0.97 
 -15   5   0   15.54    1.05 
  15   5   0   14.20    0.92 
  15   5   0   16.30    0.99 
 -15   5   0   15.83    0.96 
 -15   5   0   14.89    0.94 
 -15   5   0   14.60    0.97 
  15   5   0   15.58    0.96 
 -15   5   0   15.05    0.92 
 -17  -5   0    0.20    0.10 
  17  -5   0    0.22    0.12 
  17   5   0    0.26    0.05 
  17   5   0    0.12    0.08 
 -17   5   0    0.18    0.10 
 -17   5   0    0.14    0.06 
  17   5   0    0.20    0.07 
  17   5   0    0.25    0.08 
 -17   5   0    0.21    0.11 
 -17   5   0    0.22    0.05 
 -19  -5   0    5.43    0.48 
  19  -5   0    5.21    0.50 
  19   5   0    6.52    0.39 
 -19   5   0    5.96    0.40 
 -19   5   0    6.32    0.39 
  19   5   0    6.52    0.44 
 -19   5   0    5.57    0.51 
  19   5   0    5.35    0.44 
 -21  -5   0    9.67    0.60 
 -21  -5   0    9.27    0.66 
  21  -5   0    9.51    0.61 
  21  -5   0    9.88    0.60 
 -21  -5   0   10.10    0.60 
 -21   5   0    8.94    0.56 
 -21   5   0    9.69    0.58 
  21   5   0    8.75    0.60 
 -21   5   0    8.55    0.65 
  21   5   0    9.20    0.57 
  21   5   0    9.44    0.59 
  23  -5   0    9.47    0.62 
 -23  -5   0   10.23    0.62 
 -23  -5   0   10.21    0.62 
  23  -5   0   10.49    0.63 
  23   5   0    9.19    0.58 
  23   5   0    8.52    0.61 
 -23   5   0    9.53    0.59 
 -23   5   0    9.18    0.66 
 -23   5   0    9.73    0.60 
 -25  -5   0    4.80    0.34 
  25  -5   0    4.74    0.35 
  25  -5   0    4.90    0.34 
 -25  -5   0    4.77    0.34 
 -25   5   0    5.01    0.32 
  25   5   0    4.81    0.31 
  25   5   0    5.01    0.35 
 -25   5   0    4.99    0.32 
  27  -5   0    1.64    0.15 
 -27  -5   0    1.54    0.14 
 -27  -5   0    1.47    0.14 
  27  -5   0    1.38    0.15 
  27   5   0    1.52    0.15 
 -27   5   0    1.64    0.13 
 -27   5   0    1.36    0.13 
 -29  -5   0    1.22    0.11 
 -29  -5   0    1.15    0.11 
  29  -5   0    1.14    0.12 
  29  -5   0    1.04    0.12 
 -29   5   0    1.20    0.10 
  29   5   0    1.29    0.12 
 -29   5   0    1.04    0.10 
  31  -5   0    0.14    0.04 
 -31  -5   0    0.07    0.03 
  31  -5   0    0.02    0.03 
 -31   5   0    0.10    0.03 
  31   5   0    0.11    0.04 
   0  -6   0    8.06    0.60 
   0  -6   0    8.77    0.58 
   0   6   0    9.63    0.54 
   2  -6   0   29.20    1.70 
  -2  -6   0   28.48    1.73 
   2  -6   0   23.96    1.70 
  -2  -6   0   29.65    1.69 
   2  -6   0   25.57    1.71 
  -2  -6   0   26.65    1.69 
  -2   6   0   30.15    1.65 
  -2   6   0   28.81    1.67 
   2   6   0   28.40    1.65 
  -4  -6   0   18.01    1.09 
  -4  -6   0   16.62    1.10 
   4  -6   0   17.59    1.10 
  -4  -6   0   18.12    1.13 
  -4   6   0   16.97    1.08 
  -4   6   0   17.79    1.05 
   4   6   0   17.63    1.05 
  -6  -6   0    8.74    0.59 
  -6  -6   0    8.55    0.58 
   6  -6   0    8.56    0.56 
  -6   6   0    6.94    0.51 
   6   6   0    8.48    0.51 
  -6   6   0    7.96    0.54 
  -6   6   0    8.17    0.52 
   8  -6   0    9.20    0.58 
  -8  -6   0    8.41    0.60 
  -8  -6   0    8.66    0.60 
  -8   6   0    7.50    0.52 
  -8   6   0    8.27    0.57 
   8   6   0    8.61    0.52 
   8   6   0    8.36    0.55 
   8   6   0    6.92    0.52 
  -8   6   0    8.86    0.54 
  10  -6   0    6.95    0.55 
 -10  -6   0    6.73    0.55 
  10  -6   0    6.87    0.52 
 -10  -6   0    7.21    0.55 
 -10   6   0    7.36    0.48 
  10   6   0    7.97    0.52 
  10   6   0    7.18    0.48 
 -10   6   0    7.64    0.50 
 -10   6   0    8.08    0.55 
  10   6   0    8.30    0.48 
  12  -6   0    3.16    0.28 
 -12  -6   0    3.34    0.31 
 -12  -6   0    3.33    0.31 
  12  -6   0    3.21    0.31 
 -12   6   0    3.01    0.29 
 -12   6   0    3.04    0.25 
 -12   6   0    2.86    0.23 
  12   6   0    3.29    0.23 
  12   6   0    2.78    0.24 
  12   6   0    3.08    0.26 
 -14  -6   0    6.12    0.49 
 -14  -6   0    5.65    0.47 
  14  -6   0    5.14    0.48 
 -14   6   0    6.46    0.38 
  14   6   0    5.95    0.38 
  14   6   0    5.87    0.44 
  14   6   0    6.53    0.41 
 -14   6   0    5.47    0.48 
 -14   6   0    5.85    0.43 
  14   6   0    5.85    0.42 
 -14   6   0    6.19    0.41 
 -16  -6   0    6.54    0.53 
  16  -6   0    5.56    0.54 
 -16  -6   0    6.42    0.52 
 -16   6   0    5.97    0.54 
  16   6   0    6.18    0.49 
  16   6   0    7.15    0.43 
  16   6   0    6.87    0.46 
 -16   6   0    6.95    0.47 
 -16   6   0    7.26    0.43 
  16   6   0    7.60    0.49 
 -18  -6   0    1.84    0.19 
 -18  -6   0    1.90    0.21 
  18  -6   0    1.55    0.25 
  18  -6   0    2.10    0.19 
 -18  -6   0    2.16    0.22 
 -18  -6   0    1.83    0.19 
  18   6   0    2.18    0.26 
  18   6   0    2.35    0.17 
  18   6   0    2.16    0.16 
 -18   6   0    2.09    0.19 
 -18   6   0    2.35    0.16 
 -18   6   0    2.36    0.17 
  18   6   0    2.51    0.22 
 -20  -6   0    0.90    0.13 
 -20  -6   0    0.76    0.12 
 -20  -6   0    0.82    0.12 
  20  -6   0    0.78    0.11 
 -20  -6   0    0.73    0.11 
  20   6   0    0.60    0.08 
 -20   6   0    0.48    0.06 
 -20   6   0    0.46    0.11 
  20   6   0    0.54    0.13 
 -20   6   0    0.63    0.09 
  20   6   0    0.56    0.09 
  20   6   0    0.68    0.11 
 -22  -6   0   11.35    0.87 
  22  -6   0   11.58    0.86 
  22  -6   0   13.44    0.80 
 -22  -6   0   13.29    0.81 
 -22  -6   0   13.01    0.81 
 -22   6   0   12.97    0.77 
 -22   6   0   13.69    0.78 
  22   6   0   12.01    0.79 
  22   6   0   13.46    0.81 
  22   6   0   13.23    0.77 
 -24  -6   0    0.38    0.08 
  24  -6   0    0.32    0.08 
  24  -6   0    0.34    0.08 
 -24   6   0    0.34    0.07 
  24   6   0    0.39    0.09 
  24   6   0    0.39    0.05 
 -24   6   0    0.36    0.06 
  26  -6   0    0.83    0.11 
 -26  -6   0    0.84    0.11 
  26  -6   0    0.86    0.11 
 -26  -6   0    0.88    0.11 
 -26   6   0    0.91    0.10 
 -26   6   0    0.74    0.09 
  26   6   0    0.78    0.11 
  26   6   0    0.70    0.07 
 -28  -6   0    0.05    0.04 
  28  -6   0    0.05    0.04 
 -28  -6   0    0.07    0.04 
  28  -6   0    0.04    0.04 
 -28   6   0    0.10    0.04 
  28   6   0    0.09    0.05 
 -28   6   0    0.06    0.04 
 -30  -6   0    0.05    0.03 
  30  -6   0    0.08    0.04 
  30   6   0    0.08    0.04 
  -1  -7   0    3.92    0.34 
   1  -7   0    4.11    0.32 
  -1  -7   0    3.92    0.31 
   1  -7   0    3.84    0.33 
  -1   7   0    3.92    0.27 
   1   7   0    3.96    0.27 
   3  -7   0    9.80    0.62 
  -3  -7   0    9.96    0.61 
  -3  -7   0    9.21    0.65 
  -3  -7   0    7.90    0.64 
   3   7   0    8.00    0.55 
  -3   7   0    8.11    0.55 
   3   7   0    9.28    0.55 
  -3   7   0    9.11    0.56 
  -5  -7   0    6.52    0.48 
  -5  -7   0    6.14    0.45 
   5  -7   0    6.69    0.45 
   5   7   0    5.79    0.38 
   5   7   0    5.02    0.37 
  -5   7   0    5.29    0.38 
  -5   7   0    6.00    0.39 
   7   7   0    1.83    0.16 
   7   7   0    2.24    0.16 
   7   7   0    2.09    0.20 
  -7   7   0    2.15    0.17 
  -7   7   0    1.97    0.17 
   9   7   0    0.47    0.11 
  -9   7   0    0.44    0.08 
   9   7   0    0.46    0.07 
  -9   7   0    0.39    0.11 
   9   7   0    0.46    0.08 
  -9   7   0    0.34    0.08 
 -11  -7   0    2.68    0.31 
 -11  -7   0    2.69    0.31 
  11  -7   0    2.75    0.29 
  11   7   0    3.38    0.28 
 -11   7   0    3.23    0.22 
  11   7   0    3.70    0.27 
 -11   7   0    3.41    0.27 
 -11   7   0    3.56    0.25 
  11   7   0    3.32    0.23 
 -11   7   0    3.22    0.30 
  11   7   0    3.61    0.25 
 -13  -7   0    2.63    0.31 
 -13  -7   0    2.79    0.31 
 -13   7   0    3.61    0.26 
  13   7   0    3.38    0.25 
 -13   7   0    3.06    0.26 
 -13   7   0    3.26    0.22 
  13   7   0    3.13    0.22 
  13   7   0    3.38    0.28 
 -13   7   0    2.74    0.30 
  13   7   0    3.54    0.27 
 -15  -7   0    0.61    0.15 
  15   7   0    0.87    0.10 
  15   7   0    0.87    0.11 
 -15   7   0    0.67    0.15 
 -15   7   0    0.75    0.12 
  15   7   0    0.84    0.14 
 -15   7   0    0.87    0.12 
  15   7   0    0.95    0.14 
 -15   7   0    0.97    0.09 
 -17  -7   0    4.89    0.38 
 -17  -7   0    5.22    0.38 
  17  -7   0    4.52    0.35 
 -17  -7   0    5.80    0.42 
  17  -7   0    4.98    0.37 
 -17  -7   0    5.01    0.37 
 -17  -7   0    4.68    0.37 
  17   7   0    6.03    0.35 
 -17   7   0    5.36    0.39 
 -17   7   0    5.10    0.33 
  17   7   0    5.90    0.41 
 -17   7   0    5.86    0.35 
  17   7   0    4.80    0.33 
 -19  -7   0    1.03    0.16 
 -19  -7   0    1.12    0.14 
  19  -7   0    0.94    0.13 
 -19  -7   0    1.16    0.14 
  19  -7   0    1.09    0.12 
 -19  -7   0    0.77    0.13 
 -19  -7   0    0.97    0.13 
  19   7   0    0.82    0.10 
  19   7   0    0.81    0.09 
 -19   7   0    0.74    0.10 
 -19   7   0    0.78    0.10 
 -19   7   0    0.86    0.09 
 -21  -7   0    1.94    0.18 
 -21  -7   0    1.81    0.20 
 -21  -7   0    1.63    0.17 
  21  -7   0    1.64    0.15 
 -21  -7   0    1.72    0.17 
  21   7   0    1.52    0.17 
  21   7   0    1.54    0.13 
 -21   7   0    1.62    0.12 
  21   7   0    1.70    0.14 
  21   7   0    1.38    0.18 
 -21   7   0    1.59    0.14 
  23  -7   0    1.10    0.12 
 -23  -7   0    1.14    0.13 
 -23  -7   0    1.00    0.12 
 -23  -7   0    1.05    0.13 
  23   7   0    1.15    0.09 
 -23   7   0    1.12    0.11 
 -23   7   0    0.94    0.09 
  23   7   0    1.05    0.11 
  23   7   0    1.16    0.14 
 -25  -7   0    0.26    0.07 
 -25  -7   0    0.28    0.07 
  25  -7   0    0.28    0.06 
 -25   7   0    0.34    0.06 
  25   7   0    0.31    0.04 
 -25   7   0    0.38    0.06 
  25   7   0    0.37    0.07 
 -27  -7   0    0.16    0.05 
  27   7   0    0.16    0.05 
  27   7   0    0.15    0.05 
 -27   7   0    0.18    0.04 
 -27   7   0    0.13    0.04 
   0  -8   0   33.60    2.14 
   0  -8   0   36.42    2.10 
   0   8   0   33.30    2.03 
   0   8   0   33.57    2.03 
  -2  -8   0   14.73    1.02 
  -2  -8   0   14.99    0.97 
   2  -8   0   14.64    0.97 
  -2   8   0   15.32    0.91 
  -2   8   0   14.75    0.91 
   2   8   0   14.24    0.91 
   2   8   0   15.50    0.91 
  -4  -8   0    4.01    0.40 
   4  -8   0    3.70    0.36 
  -4   8   0    4.98    0.32 
  -4   8   0    4.71    0.32 
   4   8   0    5.05    0.31 
   6  -8   0    7.27    0.53 
  -6  -8   0    7.43    0.57 
  -6  -8   0    6.99    0.54 
   6   8   0    6.64    0.44 
  -6   8   0    6.92    0.46 
   6   8   0    6.60    0.45 
  -6   8   0    6.61    0.46 
  -8  -8   0    2.82    0.31 
  -8  -8   0    3.25    0.34 
   8  -8   0    3.09    0.30 
   8   8   0    3.48    0.26 
  -8   8   0    3.24    0.25 
   8   8   0    3.34    0.24 
  -8   8   0    3.50    0.25 
   8   8   0    3.56    0.29 
  -8   8   0    2.96    0.22 
 -10  -8   0    1.09    0.18 
  10  -8   0    0.95    0.16 
 -10  -8   0    0.92    0.17 
 -10   8   0    0.80    0.11 
 -10   8   0    0.71    0.11 
  10   8   0    0.71    0.09 
 -10   8   0    0.73    0.08 
  10   8   0    0.78    0.12 
  10   8   0    0.76    0.13 
  12  -8   0    4.85    0.39 
 -12  -8   0    3.63    0.40 
 -12  -8   0    4.54    0.38 
 -12  -8   0    4.19    0.40 
  12  -8   0    3.68    0.37 
 -12   8   0    4.98    0.33 
 -12   8   0    4.72    0.29 
  12   8   0    4.37    0.30 
  12   8   0    4.27    0.36 
  12   8   0    4.97    0.35 
  12   8   0    4.51    0.37 
 -14  -8   0    9.74    0.64 
  14  -8   0    9.43    0.63 
 -14  -8   0    9.95    0.68 
  14  -8   0    9.94    0.63 
 -14  -8   0    9.52    0.62 
 -14  -8   0    9.82    0.63 
 -14  -8   0    8.75    0.63 
  14   8   0    9.86    0.61 
 -14   8   0    8.65    0.59 
 -14   8   0   10.70    0.65 
  14   8   0   10.45    0.67 
 -14   8   0   10.06    0.60 
 -16  -8   0    5.00    0.35 
 -16  -8   0    4.62    0.33 
 -16  -8   0    4.95    0.34 
 -16  -8   0    4.75    0.39 
 -16  -8   0    4.34    0.34 
  16  -8   0    4.79    0.34 
 -16   8   0    4.55    0.31 
 -16   8   0    4.50    0.29 
  16   8   0    4.41    0.31 
 -16   8   0    4.39    0.34 
 -18  -8   0    3.37    0.27 
  18  -8   0    3.30    0.26 
 -18  -8   0    3.74    0.31 
 -18  -8   0    3.39    0.27 
 -18  -8   0    3.47    0.27 
 -18  -8   0    3.00    0.27 
 -18   8   0    3.09    0.28 
 -18   8   0    3.47    0.22 
  18   8   0    3.31    0.22 
  18   8   0    3.41    0.30 
 -18   8   0    3.33    0.23 
  18   8   0    3.56    0.24 
 -20  -8   0    5.12    0.37 
  20  -8   0    4.90    0.34 
 -20  -8   0    5.12    0.35 
 -20  -8   0    5.12    0.36 
 -20  -8   0    5.32    0.35 
 -20   8   0    4.41    0.32 
  20   8   0    4.94    0.33 
 -20   8   0    5.03    0.31 
 -20   8   0    4.68    0.32 
  20   8   0    5.04    0.31 
 -22  -8   0    1.38    0.15 
 -22  -8   0    1.47    0.15 
 -22   8   0    1.38    0.12 
 -22   8   0    1.39    0.10 
  22   8   0    1.43    0.11 
  22   8   0    1.23    0.12 
 -24  -8   0    0.15    0.06 
 -24  -8   0    0.10    0.05 
  24   8   0    0.11    0.03 
 -24   8   0    0.13    0.04 
  24   8   0    0.13    0.05 
 -24   8   0    0.14    0.04 
 -26  -8   0    0.37    0.06 
 -26  -8   0    0.38    0.06 
 -26   8   0    0.35    0.05 
  26   8   0    0.22    0.05 
  26   8   0    0.34    0.06 
  26   8   0    0.35    0.04 
 -26   8   0    0.26    0.04 
  -1  -9   0    0.45    0.16 
   1  -9   0    0.46    0.14 
  -1   9   0    0.48    0.07 
   1   9   0    0.64    0.09 
  -1   9   0    0.63    0.09 
   1   9   0    0.51    0.07 
   3  -9   0    0.95    0.16 
  -3  -9   0    0.94    0.19 
  -3   9   0    1.00    0.11 
   3   9   0    1.08    0.12 
   3   9   0    1.03    0.10 
  -3   9   0    1.12    0.12 
   5  -9   0    0.29    0.11 
  -5  -9   0    0.49    0.17 
  -5   9   0    0.46    0.08 
  -5   9   0    0.50    0.09 
   5   9   0    0.50    0.09 
   5   9   0    0.39    0.06 
  -7  -9   0    1.63    0.21 
   7  -9   0    1.82    0.21 
   7  -9   0    1.49    0.20 
  -7  -9   0    1.66    0.17 
   7  -9   0    1.70    0.16 
   7  -9   0    1.42    0.21 
  -7  -9   0    1.57    0.23 
  -7  -9   0    1.70    0.18 
   7   9   0    1.80    0.18 
  -7   9   0    1.65    0.16 
   7   9   0    1.41    0.18 
  -7   9   0    1.69    0.13 
   9  -9   0    2.60    0.23 
  -9  -9   0    2.48    0.21 
  -9  -9   0    2.90    0.21 
  -9  -9   0    2.48    0.21 
   9  -9   0    2.58    0.23 
   9  -9   0    2.64    0.20 
  -9   9   0    2.43    0.18 
   9   9   0    2.68    0.24 
  -9   9   0    2.56    0.22 
 -11  -9   0    3.65    0.28 
 -11  -9   0    3.38    0.27 
  11  -9   0    3.67    0.26 
  11  -9   0    3.84    0.29 
  11  -9   0    3.70    0.28 
 -11  -9   0    3.62    0.27 
  11   9   0    3.75    0.31 
 -11   9   0    3.38    0.24 
 -11   9   0    3.71    0.28 
  11   9   0    3.31    0.25 
 -13  -9   0    2.45    0.21 
  13  -9   0    2.54    0.22 
  13  -9   0    2.77    0.23 
 -13  -9   0    2.67    0.23 
 -13  -9   0    2.65    0.22 
 -13   9   0    2.48    0.22 
 -13   9   0    2.47    0.19 
  13   9   0    2.74    0.20 
  13   9   0    2.52    0.25 
 -15  -9   0    0.39    0.09 
  15  -9   0    0.47    0.09 
 -15  -9   0    0.46    0.09 
 -15  -9   0    0.45    0.10 
  15  -9   0    0.47    0.10 
 -15   9   0    0.35    0.10 
  15   9   0    0.41    0.07 
 -15   9   0    0.30    0.05 
  15   9   0    0.31    0.10 
 -15   9   0    0.33    0.06 
  17  -9   0    0.54    0.14 
 -17  -9   0    0.66    0.11 
  17  -9   0    0.54    0.10 
 -17  -9   0    0.61    0.10 
 -17  -9   0    0.54    0.11 
  17   9   0    0.69    0.08 
 -17   9   0    0.65    0.12 
 -17   9   0    0.80    0.09 
  17   9   0    0.75    0.13 
 -17   9   0    0.80    0.08 
  17   9   0    0.76    0.10 
 -19  -9   0    0.42    0.08 
 -19  -9   0    0.29    0.08 
  19  -9   0    0.32    0.08 
 -19  -9   0    0.37    0.09 
 -19   9   0    0.50    0.06 
 -19   9   0    0.38    0.06 
  19   9   0    0.35    0.10 
  19   9   0    0.35    0.07 
 -19   9   0    0.54    0.07 
  19   9   0    0.53    0.07 
 -21  -9   0    0.74    0.10 
 -21  -9   0    0.73    0.10 
  21  -9   0    0.65    0.10 
 -21   9   0    0.83    0.08 
  21   9   0    0.64    0.08 
 -21   9   0    0.74    0.07 
  21   9   0    0.81    0.08 
 -23  -9   0    0.05    0.05 
  23   9   0    0.02    0.03 
 -23   9   0    0.00    0.03 
 -23   9   0    0.02    0.03 
 -25  -9   0    0.09    0.04 
 -25  -9   0    0.05    0.04 
  25   9   0    0.08    0.02 
 -25   9   0    0.10    0.03 
  25   9   0    0.07    0.04 
 -25   9   0    0.07    0.03 
   0 -10   0    1.17    0.15 
   0 -10   0    1.21    0.13 
   0 -10   0    1.29    0.13 
   0  10   0    1.41    0.15 
  -2 -10   0   14.29    0.86 
   2 -10   0   13.64    0.86 
  -2 -10   0   13.93    0.86 
   2 -10   0   13.30    0.89 
  -2 -10   0   13.39    0.86 
   2 -10   0   14.31    0.86 
   2  10   0   14.38    0.89 
  -2  10   0   14.60    0.89 
   4 -10   0    8.62    0.55 
  -4 -10   0    8.24    0.55 
   4 -10   0    7.88    0.59 
   4 -10   0    8.62    0.58 
  -4 -10   0    8.21    0.55 
   4 -10   0    8.89    0.56 
  -4 -10   0    8.64    0.56 
   4  10   0    9.38    0.59 
  -4  10   0    9.29    0.58 
  -6 -10   0    1.47    0.14 
  -6 -10   0    1.41    0.15 
  -6 -10   0    1.25    0.15 
   6 -10   0    1.42    0.17 
   6 -10   0    1.23    0.16 
   6 -10   0    1.36    0.14 
  -6  10   0    1.82    0.13 
   6  10   0    1.89    0.18 
  -8 -10   0    0.96    0.12 
   8 -10   0    0.98    0.15 
   8 -10   0    0.91    0.12 
  -8 -10   0    1.19    0.13 
   8 -10   0    1.06    0.14 
  -8 -10   0    1.09    0.13 
   8  10   0    1.07    0.11 
   8  10   0    1.05    0.15 
  -8  10   0    1.09    0.10 
  -8  10   0    1.01    0.13 
  10 -10   0    3.17    0.26 
 -10 -10   0    2.99    0.24 
 -10 -10   0    3.34    0.25 
  10 -10   0    3.45    0.27 
 -10 -10   0    3.39    0.25 
 -10  10   0    3.23    0.26 
  10  10   0    3.06    0.23 
 -10  10   0    3.21    0.22 
  10  10   0    3.22    0.29 
 -12 -10   0    2.38    0.21 
 -12 -10   0    2.39    0.21 
 -12 -10   0    2.30    0.20 
  12 -10   0    2.40    0.21 
  12 -10   0    2.16    0.21 
 -12  10   0    2.35    0.17 
  12  10   0    2.70    0.19 
 -12  10   0    2.61    0.22 
 -12  10   0    2.57    0.18 
  12  10   0    2.52    0.25 
 -14 -10   0    5.32    0.37 
 -14 -10   0    5.18    0.36 
  14 -10   0    5.06    0.36 
  14 -10   0    5.41    0.37 
 -14 -10   0    5.21    0.37 
 -14  10   0    5.04    0.38 
 -14  10   0    5.18    0.33 
 -14  10   0    5.40    0.34 
  14  10   0    5.09    0.41 
  14  10   0    5.31    0.35 
 -16 -10   0    5.19    0.35 
 -16 -10   0    5.50    0.36 
  16 -10   0    5.59    0.36 
 -16 -10   0    5.48    0.35 
  16 -10   0    5.30    0.35 
  16  10   0    4.92    0.32 
 -16  10   0    4.91    0.33 
  16  10   0    4.81    0.39 
 -16  10   0    4.36    0.36 
 -16  10   0    5.12    0.32 
  16  10   0    4.86    0.33 
  18 -10   0    1.15    0.13 
 -18 -10   0    1.15    0.14 
 -18 -10   0    1.01    0.13 
 -18 -10   0    1.11    0.14 
 -18  10   0    1.71    0.12 
  18  10   0    1.60    0.11 
 -18  10   0    1.58    0.11 
  18  10   0    1.48    0.13 
 -18  10   0    1.40    0.12 
 -20 -10   0    1.08    0.12 
 -20 -10   0    1.19    0.12 
  20 -10   0    1.07    0.12 
  20  10   0    1.18    0.11 
 -20  10   0    1.43    0.10 
 -20  10   0    1.27    0.09 
  20  10   0    1.37    0.10 
 -22 -10   0    0.28    0.05 
  22 -10   0    0.21    0.04 
 -22 -10   0    0.27    0.05 
  22  10   0    0.19    0.03 
  22  10   0    0.08    0.04 
 -22  10   0    0.25    0.04 
 -22  10   0    0.18    0.03 
 -22  10   0    0.25    0.04 
   1 -11   0    0.78    0.10 
   1 -11   0    0.66    0.12 
  -1 -11   0    1.05    0.11 
  -1 -11   0    0.80    0.11 
   1 -11   0    0.86    0.11 
   1  11   0    0.71    0.11 
  -1  11   0    0.72    0.11 
  -1  11   0    0.74    0.08 
  -3 -11   0    1.27    0.13 
   3 -11   0    1.10    0.15 
  -3 -11   0    1.22    0.13 
   3 -11   0    1.24    0.13 
   3  11   0    0.95    0.13 
  -3  11   0    0.87    0.09 
  -3  11   0    0.91    0.12 
  -5 -11   0    2.12    0.17 
   5 -11   0    2.12    0.20 
   5 -11   0    2.28    0.18 
  -5 -11   0    1.89    0.17 
   5 -11   0    1.92    0.19 
  -5 -11   0    2.03    0.18 
  -5  11   0    1.95    0.18 
   5  11   0    1.92    0.16 
   5  11   0    2.06    0.20 
  -5  11   0    1.82    0.15 
  -7 -11   0    5.07    0.36 
   7 -11   0    5.61    0.39 
   7 -11   0    5.31    0.36 
  -7 -11   0    5.38    0.37 
   7 -11   0    5.31    0.39 
  -7  11   0    5.62    0.35 
  -7  11   0    5.43    0.38 
   7  11   0    5.52    0.41 
   7  11   0    5.63    0.36 
   9 -11   0    5.32    0.36 
  -9 -11   0    4.95    0.33 
  -9 -11   0    4.77    0.34 
   9 -11   0    5.00    0.35 
  -9  11   0    4.85    0.35 
   9  11   0    4.67    0.37 
  -9  11   0    4.77    0.32 
 -11 -11   0    8.91    0.57 
  11 -11   0    9.32    0.57 
 -11 -11   0    9.16    0.56 
  11 -11   0    9.31    0.57 
 -11  11   0    8.22    0.53 
  11  11   0    8.31    0.60 
 -11  11   0    8.49    0.58 
 -11  11   0    8.58    0.54 
  13 -11   0    5.30    0.35 
 -13 -11   0    4.77    0.34 
 -13 -11   0    4.99    0.34 
  13 -11   0    5.27    0.35 
 -13  11   0    4.64    0.32 
 -13  11   0    5.11    0.31 
 -15 -11   0    0.09    0.05 
  15 -11   0    0.12    0.06 
 -15 -11   0    0.13    0.06 
  15 -11   0    0.14    0.05 
 -15  11   0    0.14    0.03 
 -15  11   0    0.09    0.04 
  15  11   0    0.09    0.04 
  15  11   0    0.11    0.04 
  17 -11   0    0.07    0.04 
 -17 -11   0    0.11    0.05 
  17 -11   0    0.10    0.04 
 -17  11   0    0.07    0.04 
 -17  11   0    0.13    0.03 
 -17  11   0    0.08    0.04 
  17  11   0    0.06    0.04 
  17  11   0    0.08    0.03 
  17  11   0    0.02    0.04 
 -19 -11   0    0.31    0.06 
  19 -11   0    0.28    0.05 
  19  11   0    0.39    0.05 
 -19  11   0    0.41    0.04 
  19  11   0    0.26    0.05 
 -19  11   0    0.37    0.05 
   0 -12   0    0.53    0.08 
   0  12   0    0.58    0.07 
   0  12   0    0.67    0.10 
   2 -12   0    0.79    0.12 
  -2 -12   0    0.75    0.10 
  -2 -12   0    0.73    0.10 
   2 -12   0    0.72    0.10 
  -2  12   0    0.66    0.10 
  -2  12   0    0.61    0.08 
   2  12   0    0.63    0.08 
   2  12   0    0.68    0.10 
  -4 -12   0    0.64    0.09 
  -4 -12   0    0.79    0.10 
   4 -12   0    0.77    0.09 
   4 -12   0    0.76    0.11 
  -4  12   0    0.62    0.07 
   4  12   0    0.54    0.10 
   4  12   0    0.53    0.07 
  -4  12   0    0.59    0.10 
   6 -12   0    0.06    0.08 
  -6 -12   0    0.04    0.04 
   6 -12   0    0.05    0.06 
   6  12   0    0.04    0.03 
  -6  12   0    0.04    0.03 
   8 -12   0    0.13    0.06 
   8 -12   0    0.18    0.07 
  -8 -12   0    0.07    0.05 
  -8  12   0    0.15    0.04 
   8  12   0    0.13    0.04 
 -10 -12   0    0.03    0.05 
  10 -12   0    0.00    0.05 
 -10 -12   0    0.02    0.04 
  10 -12   0    0.02    0.05 
 -10  12   0    0.02    0.03 
  10  12   0    0.03    0.03 
 -10  12   0    0.04    0.03 
 -12 -12   0    0.18    0.06 
 -12 -12   0    0.21    0.05 
  12 -12   0    0.22    0.06 
  12 -12   0    0.19    0.06 
 -12  12   0    0.22    0.04 
  12  12   0    0.22    0.04 
 -12  12   0    0.18    0.04 
  12  12   0    0.23    0.05 
 -14 -12   0    0.26    0.05 
  14 -12   0    0.21    0.05 
  14 -12   0    0.26    0.06 
 -14 -12   0    0.17    0.05 
 -14  12   0    0.31    0.04 
  14  12   0    0.30    0.04 
  16 -12   0    1.46    0.12 
 -16 -12   0    1.56    0.12 
  16 -12   0    1.49    0.12 
  16  12   0    1.50    0.11 
 -16  12   0    1.41    0.11 
 -16  12   0    1.52    0.10 
   1 -13   0    0.46    0.07 
  -1 -13   0    0.43    0.07 
  -1  13   0    0.25    0.04 
   1  13   0    0.23    0.04 
   3 -13   0    1.78    0.15 
  -3 -13   0    1.90    0.14 
  -3  13   0    1.59    0.12 
   3  13   0    1.59    0.14 
   5 -13   0    3.86    0.27 
   7 -13   0    4.55    0.31 
   9 -13   0    2.74    0.18 
   9 -13   0    2.29    0.17 
   9  13   0    2.22    0.17 
  -9  13   0    2.32    0.15 
  11 -13   0    0.83    0.09 
  11 -13   0    0.73    0.09 
 -11  13   0    0.74    0.06 
 -32   0   1    0.70    0.08 
 -32   0   1    0.63    0.08 
  32   0  -1    0.67    0.09 
  32   0  -1    0.44    0.08 
  30   0  -1    0.13    0.06 
 -30   0   1    0.19    0.06 
 -30   0   1    0.26    0.06 
  30   0  -1    0.15    0.06 
  28   0  -1    0.11    0.07 
  28   0  -1    0.11    0.07 
 -28   0   1    0.12    0.06 
 -28   0   1    0.09    0.06 
  26   0  -1    0.47    0.10 
 -26   0   1    0.56    0.08 
  26   0  -1    0.48    0.10 
  26   0  -1    0.89    0.12 
 -26   0   1    0.61    0.09 
  24   0  -1    2.04    0.18 
  24   0  -1    2.07    0.19 
 -24   0   1    2.03    0.17 
 -24   0   1    2.04    0.16 
 -24   0   1    1.87    0.17 
  24   0  -1    1.83    0.19 
  24   0  -1    1.76    0.18 
  22   0  -1    0.02    0.07 
  22   0  -1    0.05    0.06 
 -22   0   1    0.03    0.08 
 -22   0   1    0.04    0.06 
  20   0  -1   13.30    0.80 
  20   0  -1   12.06    0.83 
 -20   0   1   12.33    0.87 
 -20   0   1   12.81    0.80 
 -18   0   1    7.03    0.54 
  18   0  -1    7.38    0.48 
  18   0  -1    7.34    0.45 
 -18   0   1    7.16    0.49 
 -18   0   1    6.98    0.45 
  18   0  -1    7.56    0.51 
 -16   0   1    8.67    0.52 
  16   0  -1    8.83    0.52 
 -16   0   1    8.59    0.56 
  16   0  -1    8.44    0.54 
  16   0  -1    8.48    0.57 
 -16   0   1    8.10    0.60 
  14   0  -1    4.86    0.34 
 -14   0   1    5.02    0.31 
  14   0  -1    5.01    0.33 
  14   0  -1    4.64    0.32 
 -14   0   1    4.65    0.32 
  14   0  -1    5.00    0.30 
 -14   0   1    4.90    0.34 
 -14   0   1    4.81    0.34 
 -14   0   1    4.85    0.37 
  12   0  -1    6.05    0.41 
 -12   0   1    6.14    0.42 
 -12   0   1    6.73    0.45 
  12   0  -1    6.74    0.39 
  12   0  -1    6.79    0.42 
 -12   0   1    6.78    0.40 
 -12   0   1    6.19    0.40 
 -12   0   1    6.13    0.42 
  12   0  -1    6.40    0.41 
  10   0  -1    3.55    0.22 
 -10   0   1    3.57    0.26 
 -10   0   1    3.53    0.22 
  10   0  -1    3.41    0.24 
 -10   0   1    3.16    0.23 
 -10   0   1    3.50    0.22 
 -10   0   1    3.39    0.23 
  10   0  -1    3.48    0.23 
  -8   0   1    4.30    0.26 
  -8   0   1    4.16    0.27 
  -8   0   1    4.10    0.26 
  -8   0   1    4.37    0.29 
   8   0  -1    4.11    0.26 
   8   0  -1    4.09    0.27 
  -6   0   1    1.37    0.09 
  -6   0   1    1.29    0.11 
   6   0  -1    1.16    0.08 
   4   0  -1   11.04    0.72 
  -4   0   1   12.41    0.72 
  -2   0   1    0.61    0.07 
   2   0  -1    0.51    0.07 
   0   0   1    0.46    0.05 
   0   0   1    0.43    0.05 
   0   0  -1    0.49    0.05 
  -2   0  -1    1.05    0.10 
   2   0   1    1.01    0.09 
   4   0   1    0.48    0.07 
  -4   0  -1    0.47    0.07 
   6   0   1    0.57    0.05 
   6   0   1    0.57    0.07 
  -6   0  -1    0.68    0.05 
   6   0   1    0.56    0.06 
   6   0   1    0.63    0.06 
  -6   0  -1    0.65    0.08 
  -8   0  -1    0.25    0.03 
   8   0   1    0.18    0.03 
  -8   0  -1    0.20    0.05 
   8   0   1    0.21    0.06 
  -8   0  -1    0.22    0.06 
  -8   0  -1    0.28    0.07 
   8   0   1    0.13    0.04 
 -10   0  -1    6.78    0.47 
 -10   0  -1    7.64    0.50 
 -10   0  -1    7.09    0.47 
  10   0   1    7.57    0.45 
  10   0   1    6.85    0.47 
  10   0   1    8.09    0.48 
 -10   0  -1    7.55    0.44 
 -12   0  -1    0.63    0.06 
 -12   0  -1    0.54    0.10 
 -12   0  -1    0.74    0.09 
  12   0   1    0.63    0.09 
  12   0   1    0.64    0.10 
  12   0   1    0.64    0.07 
 -14   0  -1    0.54    0.08 
  14   0   1    0.46    0.08 
  14   0   1    0.56    0.09 
  14   0   1    0.58    0.06 
 -14   0  -1    0.45    0.10 
  16   0   1    3.00    0.20 
 -16   0  -1    2.80    0.27 
  16   0   1    3.20    0.26 
  16   0   1    2.75    0.23 
 -16   0  -1    2.78    0.22 
  18   0   1    0.45    0.07 
  18   0   1    0.30    0.10 
 -18   0  -1    0.43    0.08 
  18   0   1    0.51    0.10 
  20   0   1    0.25    0.09 
  20   0   1    0.20    0.09 
  20   0   1    0.18    0.05 
  22   0   1    1.63    0.18 
  22   0   1    1.55    0.18 
  22   0   1    1.52    0.20 
 -22   0  -1    1.49    0.14 
  22   0   1    1.60    0.21 
  24   0   1    0.19    0.08 
 -24   0  -1    0.16    0.06 
  24   0   1    0.32    0.08 
  24   0   1    0.31    0.11 
 -26   0  -1    0.70    0.09 
  26   0   1    0.70    0.11 
  26   0   1    0.79    0.12 
 -26   0  -1    0.79    0.10 
  28   0   1    0.27    0.07 
 -28   0  -1    0.14    0.05 
  28   0   1    0.21    0.07 
 -28   0  -1    0.23    0.06 
  30   0   1    0.02    0.04 
 -30   0  -1    0.03    0.04 
 -30   0  -1    0.01    0.04 
  30   0   1   -0.01    0.05 
 -32   0  -1    0.08    0.03 
  32   0   1    0.08    0.04 
  33  -1  -1    0.27    0.06 
  33  -1  -1    0.21    0.06 
 -33  -1   1    0.24    0.05 
 -33  -1   1    0.21    0.04 
 -33   1   1    0.30    0.05 
 -33   1   1    0.27    0.05 
  31  -1  -1    0.12    0.06 
 -31  -1   1    0.08    0.05 
 -31  -1   1    0.17    0.05 
  31   1  -1    0.06    0.05 
  31   1  -1    0.12    0.06 
 -31   1   1    0.15    0.05 
 -31   1   1    0.13    0.05 
  29  -1  -1    0.27    0.08 
 -29  -1   1    0.14    0.05 
 -29  -1   1    0.15    0.06 
  29  -1  -1    0.20    0.07 
  29   1  -1    0.20    0.07 
 -29   1   1    0.22    0.06 
  29   1  -1    0.18    0.06 
 -29   1   1    0.21    0.06 
 -27  -1   1    0.84    0.11 
  27  -1  -1    0.91    0.13 
  27  -1  -1    1.09    0.14 
 -27  -1   1    1.06    0.12 
 -27   1   1    0.91    0.11 
 -27   1   1    0.94    0.11 
  27   1  -1    0.73    0.12 
  27   1  -1    0.90    0.13 
 -25  -1   1    8.92    0.54 
 -25  -1   1    9.00    0.54 
  25  -1  -1    8.27    0.56 
  25  -1  -1    9.31    0.57 
  25   1  -1    7.87    0.55 
  25   1  -1    7.81    0.55 
  25   1  -1    8.55    0.57 
 -25   1   1    8.47    0.53 
 -25   1   1    8.42    0.56 
 -25   1   1    8.29    0.54 
  23  -1  -1    0.15    0.09 
  23   1  -1    0.20    0.09 
 -23   1   1    0.37    0.14 
  23   1  -1    0.26    0.10 
 -23   1   1    0.16    0.08 
  21  -1  -1    6.95    0.54 
  21  -1  -1    6.96    0.48 
 -21  -1   1    6.57    0.47 
 -21   1   1    7.74    0.58 
 -21   1   1    7.35    0.46 
  21   1  -1    7.74    0.46 
  21   1  -1    7.92    0.51 
 -21   1   1    7.96    0.52 
  21   1  -1    7.67    0.54 
 -19  -1   1   19.44    1.44 
  19  -1  -1   22.31    1.43 
  19  -1  -1   25.51    1.38 
 -19  -1   1   23.94    1.38 
 -19   1   1   22.35    1.36 
  19   1  -1   22.77    1.39 
  19   1  -1   22.71    1.35 
  19   1  -1   21.70    1.41 
 -19   1   1   24.65    1.41 
 -19   1   1   22.21    1.46 
  17  -1  -1    2.81    0.21 
 -17  -1   1    2.66    0.21 
  17  -1  -1    2.61    0.24 
 -17  -1   1    2.63    0.21 
 -17  -1   1    2.55    0.25 
 -17   1   1    2.79    0.19 
 -17   1   1    2.70    0.26 
  17   1  -1    2.65    0.22 
 -17   1   1    2.66    0.23 
  17   1  -1    2.58    0.18 
  17   1  -1    2.64    0.21 
 -15  -1   1    4.49    0.31 
 -15  -1   1    4.51    0.33 
  15  -1  -1    3.83    0.34 
  15  -1  -1    5.04    0.35 
 -15  -1   1    4.94    0.37 
  15  -1  -1    4.57    0.31 
 -15  -1   1    4.59    0.28 
 -15  -1   1    4.98    0.32 
  15  -1  -1    4.41    0.29 
  15   1  -1    4.86    0.33 
  15   1  -1    4.53    0.29 
 -15   1   1    3.94    0.32 
 -15   1   1    4.69    0.30 
 -15   1   1    5.08    0.37 
  15   1  -1    3.93    0.31 
 -13  -1   1    1.57    0.15 
 -13  -1   1    1.59    0.13 
  13  -1  -1    1.45    0.13 
  13  -1  -1    1.52    0.13 
 -13  -1   1    1.80    0.17 
 -13  -1   1    1.55    0.11 
  13  -1  -1    1.52    0.11 
  13  -1  -1    1.66    0.15 
 -13  -1   1    1.36    0.13 
  13   1  -1    1.78    0.14 
 -13   1   1    1.71    0.12 
  13   1  -1    1.33    0.13 
  13   1  -1    1.75    0.12 
 -13   1   1    1.38    0.14 
 -11  -1   1    6.48    0.42 
 -11  -1   1    6.62    0.44 
  11  -1  -1    5.77    0.40 
 -11  -1   1    6.84    0.39 
 -11  -1   1    6.06    0.41 
  11  -1  -1    6.50    0.43 
  11  -1  -1    6.10    0.38 
 -11  -1   1    6.49    0.41 
 -11  -1   1    6.98    0.41 
  11  -1  -1    6.41    0.41 
 -11   1   1    6.88    0.45 
 -11   1   1    6.28    0.39 
 -11   1   1    6.44    0.41 
 -11   1   1    6.03    0.40 
  11   1  -1    6.98    0.42 
  11   1  -1    5.74    0.41 
  11   1  -1    6.49    0.39 
  -9  -1   1   36.50    2.18 
  -9  -1   1   39.78    2.21 
  -9  -1   1   35.78    2.19 
   9  -1  -1   34.68    2.16 
  -9  -1   1   38.23    2.18 
   9  -1  -1   37.77    2.19 
  -9  -1   1   39.22    2.17 
   9  -1  -1   37.15    2.20 
  -9   1   1   33.62    2.17 
   9   1  -1   34.36    2.18 
   9   1  -1   38.91    2.19 
  -9   1   1   35.49    2.17 
  -9   1   1   37.38    2.19 
  -9   1   1   40.98    2.22 
   9   1  -1   37.37    2.17 
  -7  -1   1   94.91    5.60 
   7  -1  -1   89.91    5.61 
  -7  -1   1  100.12    5.63 
  -7  -1   1  107.52    5.68 
   7  -1  -1   96.26    5.61 
  -7  -1   1   95.20    5.63 
   7   1  -1   93.36    5.60 
  -7   1   1   96.52    5.63 
  -7   1   1   95.02    5.67 
   7   1  -1   94.12    5.63 
  -5  -1   1  214.17   12.21 
  -5  -1   1  219.79   12.22 
  -5   1   1  200.21   12.22 
  -5   1   1  198.44   12.15 
  -3  -1   1   48.82    2.78 
   3  -1  -1   44.40    2.73 
   3   1  -1   43.71    2.72 
  -3   1   1   47.88    2.78 
  -1   1   1   24.47    1.46 
   1  -1   1    0.22    0.06 
  -1  -1  -1    0.21    0.04 
   3   1   1   38.71    2.26 
   5  -1   1   47.24    2.68 
  -5  -1  -1   44.20    2.70 
  -5  -1  -1   48.80    2.70 
   5  -1   1   47.71    2.70 
  -5   1  -1   43.97    2.68 
   5   1   1   45.07    2.68 
   5   1   1   43.22    2.69 
  -5   1  -1   46.67    2.71 
   7  -1   1   53.08    3.15 
  -7  -1  -1   53.05    3.15 
  -7  -1  -1   55.10    3.15 
   7  -1   1   52.14    3.12 
  -7  -1  -1   48.37    3.15 
  -7   1  -1   56.51    3.17 
   7   1   1   55.59    3.13 
   7   1   1   53.82    3.14 
  -7   1  -1   54.45    3.12 
   9  -1   1   25.45    1.57 
   9  -1   1   25.27    1.61 
  -9  -1  -1   27.16    1.61 
  -9  -1  -1   24.63    1.62 
  -9  -1  -1   25.90    1.60 
   9   1   1   25.98    1.57 
   9   1   1   28.65    1.60 
   9   1   1   27.89    1.59 
  -9   1  -1   28.44    1.63 
  -9   1  -1   28.87    1.58 
  11  -1   1  110.06    6.35 
 -11  -1  -1  102.91    6.36 
 -11  -1  -1   98.00    6.30 
  11  -1   1  110.83    6.31 
  11  -1   1   98.32    6.33 
 -11  -1  -1  107.68    6.34 
 -11  -1  -1  103.43    6.33 
 -11   1  -1  114.22    6.30 
  11   1   1  109.64    6.30 
 -11   1  -1  115.63    6.38 
  11   1   1  108.79    6.32 
 -11   1  -1  108.54    6.33 
  11   1   1  120.59    6.34 
 -13  -1  -1   27.50    1.80 
  13  -1   1   30.11    1.87 
  13  -1   1   28.88    1.84 
  13  -1   1   31.23    1.81 
 -13  -1  -1   28.90    1.85 
  13   1   1   31.88    1.81 
 -13   1  -1   30.79    1.84 
 -13   1  -1   32.14    1.90 
  13   1   1   29.86    1.83 
 -13   1  -1   33.17    1.81 
  13   1   1   33.72    1.85 
  15  -1   1    2.92    0.21 
  15  -1   1    2.96    0.27 
  15  -1   1    2.73    0.24 
  15   1   1    3.65    0.27 
 -15   1  -1    3.39    0.25 
  15   1   1    3.46    0.22 
 -15   1  -1    3.25    0.30 
  15   1   1    3.03    0.28 
 -15   1  -1    3.33    0.21 
  17  -1   1    3.56    0.31 
  17  -1   1    3.48    0.28 
  17  -1   1    3.64    0.24 
  17   1   1    3.90    0.30 
 -17   1  -1    3.06    0.24 
 -17   1  -1    3.90    0.28 
 -17   1  -1    3.55    0.34 
  17   1   1    3.93    0.25 
  17   1   1    3.41    0.27 
  19  -1   1    0.68    0.12 
  19  -1   1    0.65    0.08 
  19  -1   1    0.89    0.14 
 -19   1  -1    0.59    0.10 
  19   1   1    0.75    0.08 
  19   1   1    0.69    0.12 
  19   1   1    0.64    0.11 
 -19   1  -1    0.47    0.15 
  21  -1   1    1.82    0.24 
  21  -1   1    2.57    0.22 
  21   1   1    2.36    0.18 
 -21   1  -1    2.46    0.19 
  21   1   1    2.59    0.23 
  21   1   1    1.84    0.23 
  23  -1   1    7.31    0.46 
  23  -1   1    6.80    0.46 
  23  -1   1    6.60    0.45 
 -23  -1  -1    6.71    0.43 
  23   1   1    6.34    0.44 
 -23   1  -1    6.18    0.43 
 -23   1  -1    6.38    0.42 
  23   1   1    6.99    0.49 
  23   1   1    6.50    0.45 
  25  -1   1    0.37    0.09 
  25  -1   1    0.39    0.11 
  25  -1   1    0.46    0.09 
 -25  -1  -1    0.45    0.08 
 -25  -1  -1    0.46    0.07 
 -25   1  -1    0.35    0.07 
 -25   1  -1    0.36    0.07 
  25   1   1    0.34    0.09 
  25   1   1    0.34    0.11 
  25   1   1    0.34    0.08 
  27  -1   1    2.80    0.23 
 -27  -1  -1    3.08    0.22 
  27  -1   1    3.20    0.24 
  27  -1   1    2.84    0.25 
 -27  -1  -1    2.91    0.22 
 -27   1  -1    2.87    0.22 
 -27   1  -1    3.22    0.22 
  27   1   1    3.26    0.24 
  27   1   1    3.09    0.24 
  29  -1   1    2.34    0.19 
 -29  -1  -1    2.03    0.17 
 -29  -1  -1    2.31    0.17 
  29  -1   1    2.10    0.19 
  29   1   1    2.17    0.18 
 -29   1  -1    2.36    0.17 
  29   1   1    2.44    0.19 
 -29   1  -1    2.30    0.17 
  31  -1   1    0.01    0.04 
 -31  -1  -1   -0.02    0.03 
  31  -1   1   -0.04    0.04 
 -31  -1  -1    0.02    0.03 
  31   1   1    0.03    0.04 
 -31   1  -1   -0.01    0.04 
  31   1   1    0.01    0.04 
 -32  -2   1    0.28    0.05 
 -32  -2   1    0.35    0.06 
  32  -2  -1    0.32    0.06 
  32  -2  -1    0.32    0.07 
 -32   2   1    0.29    0.05 
  32   2  -1    0.32    0.06 
 -32   2   1    0.26    0.05 
  30  -2  -1    1.72    0.17 
 -30  -2   1    1.61    0.15 
  30  -2  -1    1.70    0.17 
 -30  -2   1    1.62    0.15 
  30   2  -1    1.78    0.16 
 -30   2   1    1.86    0.15 
 -30   2   1    2.07    0.14 
 -28  -2   1    2.53    0.20 
  28  -2  -1    2.55    0.22 
  28  -2  -1    2.46    0.22 
 -28  -2   1    2.51    0.20 
  28   2  -1    2.40    0.21 
 -28   2   1    2.55    0.20 
 -28   2   1    2.61    0.19 
  26  -2  -1    1.73    0.18 
 -26  -2   1    1.46    0.15 
  26  -2  -1    1.34    0.17 
 -26  -2   1    1.54    0.15 
 -26   2   1    1.72    0.15 
 -26   2   1    1.68    0.18 
  26   2  -1    1.53    0.17 
 -26   2   1    1.55    0.14 
  26   2  -1    1.74    0.18 
  24  -2  -1    3.60    0.27 
  24  -2  -1    3.30    0.28 
 -24  -2   1    3.47    0.26 
 -24  -2   1    3.20    0.26 
 -24   2   1    3.80    0.26 
  24   2  -1    3.62    0.28 
 -24   2   1    3.62    0.30 
 -24   2   1    3.59    0.25 
  24   2  -1    3.64    0.30 
  22  -2  -1    4.90    0.42 
 -22   2   1    4.88    0.33 
  22   2  -1    5.23    0.37 
 -22   2   1    5.44    0.39 
  22   2  -1    5.07    0.40 
 -22   2   1    4.40    0.43 
  22   2  -1    4.95    0.33 
 -20  -2   1    0.19    0.07 
  20  -2  -1    0.17    0.09 
 -20   2   1    0.23    0.06 
 -20   2   1    0.32    0.12 
  20   2  -1    0.34    0.09 
  20   2  -1    0.56    0.12 
 -20   2   1    0.30    0.10 
 -18  -2   1    1.96    0.18 
  18  -2  -1    2.04    0.22 
 -18  -2   1    1.71    0.19 
 -18   2   1    2.26    0.23 
  18   2  -1    1.90    0.18 
  18   2  -1    1.87    0.15 
  18   2  -1    2.19    0.20 
 -18   2   1    2.11    0.16 
 -18   2   1    1.80    0.19 
 -16  -2   1    1.17    0.12 
 -16  -2   1    1.23    0.11 
  16  -2  -1    0.97    0.10 
  16  -2  -1    1.10    0.15 
 -16  -2   1    1.03    0.14 
 -16   2   1    1.51    0.12 
 -16   2   1    1.43    0.17 
  16   2  -1    1.25    0.13 
  16   2  -1    1.38    0.10 
  16   2  -1    1.27    0.13 
 -16   2   1    1.21    0.14 
 -14  -2   1   50.12    2.84 
  14  -2  -1   44.73    2.87 
  14  -2  -1   43.07    2.81 
 -14  -2   1   41.28    2.86 
 -14  -2   1   49.08    2.86 
  14  -2  -1   48.55    2.84 
 -14  -2   1   48.31    2.82 
 -14   2   1   48.54    2.84 
 -14   2   1   51.87    2.89 
  14   2  -1   51.75    2.85 
  14   2  -1   49.91    2.81 
 -14   2   1   51.72    2.82 
  14   2  -1   44.66    2.83 
  12  -2  -1   10.38    0.68 
  12  -2  -1   10.62    0.70 
 -12  -2   1   10.16    0.66 
 -12  -2   1   10.78    0.67 
 -12  -2   1   10.80    0.70 
 -12  -2   1    9.43    0.68 
 -12  -2   1   10.25    0.68 
 -12  -2   1    9.97    0.70 
  12   2  -1   11.89    0.67 
 -12   2   1   12.60    0.66 
 -12   2   1   12.84    0.68 
 -10  -2   1   25.39    1.64 
 -10  -2   1   26.72    1.61 
  10  -2  -1   28.05    1.64 
 -10  -2   1   27.19    1.62 
 -10  -2   1   27.77    1.64 
 -10  -2   1   26.24    1.63 
  10  -2  -1   28.16    1.63 
 -10  -2   1   26.30    1.62 
  10   2  -1   26.98    1.61 
 -10   2   1   25.34    1.60 
 -10   2   1   28.57    1.62 
  10   2  -1   26.37    1.60 
  10   2  -1   28.95    1.62 
 -10   2   1   29.22    1.65 
  -8  -2   1   82.16    4.99 
  -8  -2   1   83.41    4.99 
  -8  -2   1   87.24    4.99 
  -8  -2   1   89.97    4.99 
   8  -2  -1   84.05    4.98 
  -8  -2   1   84.35    4.97 
   8  -2  -1   88.72    4.99 
   8   2  -1   85.42    4.97 
   8   2  -1   87.26    4.98 
  -8   2   1   87.67    4.97 
   8   2  -1   75.50    4.95 
  -8   2   1   86.98    5.00 
  -6  -2   1   21.78    1.16 
   6  -2  -1   19.36    1.15 
  -6  -2   1   17.96    1.16 
  -6  -2   1   17.90    1.16 
  -6  -2   1   19.17    1.15 
   6  -2  -1   19.84    1.16 
   6   2  -1   19.34    1.14 
  -6   2   1   19.98    1.14 
   6   2  -1   19.07    1.15 
  -6   2   1   18.59    1.16 
  -6   2   1   19.40    1.13 
   4  -2  -1  230.15   12.96 
  -4  -2   1  240.92   13.02 
  -4  -2   1  212.31   12.92 
  -4  -2   1  211.37   13.04 
  -4   2   1  202.03   12.93 
   4   2  -1  228.46   12.91 
  -4   2   1  224.45   12.88 
  -4   2   1  219.68   12.92 
  -2  -2   1  361.95   25.51 
   2  -2  -1  406.42   24.69 
  -2  -2   1  421.88   23.12 
  -2   2   1  397.26   25.11 
   2   2  -1  412.61   23.02 
   2   2  -1  368.29   23.10 
   0  -2  -1   88.76    5.02 
   0   2   1   81.68    4.97 
   0   2  -1   87.20    4.96 
   0   2  -1   79.07    4.94 
  -2  -2  -1  147.02    8.25 
   2  -2   1  137.69    8.20 
  -2  -2  -1  140.47    8.22 
  -2  -2  -1  126.31    8.20 
  -2   2  -1  143.00    8.14 
  -2   2  -1  138.92    8.20 
  -4  -2  -1   84.66    5.13 
  -4  -2  -1   90.58    5.13 
  -4  -2  -1   91.99    5.09 
   4  -2   1   83.12    5.06 
   4  -2   1   91.92    5.13 
  -4   2  -1   78.86    5.07 
  -4   2  -1   89.85    5.15 
   4   2   1   84.44    5.09 
  -4   2  -1   88.36    5.13 
   4   2   1   86.87    5.07 
  -6  -2  -1   17.62    1.07 
   6  -2   1   18.53    1.08 
  -6  -2  -1   17.40    1.07 
  -6  -2  -1   17.48    1.07 
   6  -2   1   16.96    1.04 
   6   2   1   17.38    1.04 
  -6   2  -1   18.99    1.09 
   6   2   1   17.74    1.06 
  -6   2  -1   17.10    1.05 
  -6   2  -1   17.22    1.04 
   8  -2   1   74.26    4.44 
   8  -2   1   74.73    4.41 
  -8  -2  -1   72.75    4.45 
  -8  -2  -1   77.94    4.45 
   8  -2   1   79.08    4.46 
   8   2   1   75.95    4.44 
  -8   2  -1   70.57    4.43 
  -8   2  -1   79.94    4.47 
   8   2   1   76.67    4.42 
  -8   2  -1   75.63    4.41 
  10  -2   1    1.10    0.12 
 -10  -2  -1    1.43    0.14 
  10  -2   1    1.38    0.15 
 -10  -2  -1    1.30    0.14 
  10  -2   1    1.22    0.10 
 -10   2  -1    1.51    0.16 
  10   2   1    1.61    0.12 
  10   2   1    1.30    0.13 
 -10   2  -1    1.20    0.13 
 -10   2  -1    1.39    0.11 
  12  -2   1   18.78    1.20 
 -12  -2  -1   18.65    1.18 
 -12  -2  -1   21.59    1.20 
  12  -2   1   19.85    1.17 
  12  -2   1   19.07    1.13 
  12   2   1   19.01    1.17 
  12   2   1   19.09    1.15 
  12   2   1   16.50    1.13 
 -12   2  -1   18.81    1.22 
 -12   2  -1   19.08    1.17 
 -12   2  -1   19.72    1.14 
  14  -2   1    7.15    0.50 
 -14  -2  -1    7.47    0.56 
  14  -2   1    7.90    0.54 
  14  -2   1    7.68    0.57 
  14   2   1    9.41    0.56 
 -14   2  -1    8.94    0.51 
  14   2   1    7.56    0.53 
 -14   2  -1    9.08    0.61 
  14   2   1    8.14    0.53 
 -14   2  -1    9.03    0.55 
  14   2   1    8.11    0.50 
  16  -2   1    0.11    0.07 
  16   2   1    0.14    0.06 
 -16   2  -1    0.22    0.05 
 -16   2  -1    0.26    0.08 
  16   2   1    0.17    0.04 
 -16   2  -1    0.19    0.09 
  16   2   1    0.17    0.07 
  18  -2   1    1.62    0.17 
  18  -2   1    1.69    0.21 
 -18   2  -1    1.89    0.19 
 -18   2  -1    1.93    0.14 
  18   2   1    2.06    0.20 
 -18   2  -1    1.93    0.24 
  18   2   1    1.59    0.15 
  18   2   1    1.94    0.15 
  20  -2   1    4.87    0.32 
  20  -2   1    4.21    0.38 
 -20   2  -1    3.37    0.38 
  20   2   1    4.33    0.29 
  20   2   1    3.82    0.34 
 -20   2  -1    4.75    0.33 
  20   2   1    4.12    0.35 
 -22  -2  -1    5.18    0.34 
 -22  -2  -1    5.35    0.33 
  22  -2   1    5.52    0.35 
  22  -2   1    4.84    0.35 
  22   2   1    4.54    0.34 
 -22   2  -1    4.73    0.32 
 -22   2  -1    5.23    0.36 
 -22   2  -1    4.45    0.32 
  22   2   1    4.71    0.38 
  22   2   1    4.70    0.34 
  22   2   1    4.47    0.31 
  24  -2   1    0.86    0.13 
 -24  -2  -1    1.04    0.12 
 -24  -2  -1    1.26    0.12 
  24  -2   1    0.93    0.13 
 -24   2  -1    0.66    0.09 
 -24   2  -1    0.87    0.10 
  24   2   1    0.82    0.12 
  24   2   1    0.85    0.12 
  24   2   1    0.64    0.13 
  26  -2   1    0.55    0.10 
  26  -2   1    0.58    0.10 
 -26  -2  -1    0.60    0.08 
 -26  -2  -1    0.63    0.09 
  26   2   1    0.68    0.10 
  26   2   1    0.45    0.09 
 -26   2  -1    0.52    0.08 
 -26   2  -1    0.63    0.08 
  28  -2   1    0.98    0.13 
  28  -2   1    1.05    0.13 
 -28  -2  -1    1.00    0.11 
 -28  -2  -1    1.12    0.12 
  28   2   1    1.13    0.13 
  28   2   1    1.01    0.12 
 -28   2  -1    0.96    0.10 
 -28   2  -1    1.13    0.11 
  30  -2   1    0.06    0.05 
 -30  -2  -1    0.08    0.04 
 -30  -2  -1    0.04    0.04 
  30  -2   1    0.05    0.05 
  30   2   1    0.10    0.05 
 -30   2  -1    0.10    0.04 
  30   2   1    0.09    0.05 
  32  -2   1    0.16    0.05 
  32  -2   1    0.13    0.04 
 -32  -2  -1    0.20    0.04 
 -32   2  -1    0.16    0.04 
  32   2   1    0.20    0.05 
  33  -3  -1    0.03    0.03 
  33  -3  -1    0.10    0.04 
 -33  -3   1    0.05    0.03 
  33   3  -1    0.06    0.04 
 -33   3   1    0.05    0.04 
 -33   3   1    0.06    0.03 
 -31  -3   1    0.37    0.06 
  31  -3  -1    0.44    0.08 
 -31  -3   1    0.33    0.06 
  31  -3  -1    0.34    0.07 
 -31   3   1    0.36    0.05 
  31   3  -1    0.42    0.07 
 -31   3   1    0.39    0.06 
 -29  -3   1    0.43    0.07 
  29  -3  -1    0.38    0.08 
 -29  -3   1    0.34    0.07 
  29  -3  -1    0.47    0.09 
 -29   3   1    0.33    0.07 
  29   3  -1    0.25    0.07 
 -29   3   1    0.37    0.06 
  27  -3  -1    1.06    0.14 
 -27  -3   1    1.01    0.12 
  27  -3  -1    1.19    0.15 
 -27  -3   1    1.03    0.13 
 -27   3   1    1.30    0.12 
  27   3  -1    1.19    0.14 
 -27   3   1    1.28    0.13 
  25  -3  -1    0.99    0.14 
  25  -3  -1    0.78    0.12 
 -25  -3   1    0.80    0.11 
 -25  -3   1    0.77    0.11 
 -25   3   1    0.92    0.15 
  25   3  -1    0.93    0.13 
  25   3  -1    0.87    0.14 
 -25   3   1    1.03    0.11 
 -25   3   1    0.80    0.10 
 -23  -3   1    1.05    0.13 
 -23  -3   1    1.21    0.14 
  23  -3  -1    1.22    0.15 
  23  -3  -1    0.92    0.14 
  23   3  -1    0.97    0.14 
 -23   3   1    1.06    0.13 
 -23   3   1    1.20    0.17 
 -23   3   1    0.97    0.11 
  23   3  -1    1.15    0.15 
  21  -3  -1    4.90    0.45 
 -21   3   1    5.93    0.43 
  21   3  -1    5.46    0.42 
  21   3  -1    6.01    0.41 
 -21   3   1    5.15    0.46 
 -21   3   1    5.66    0.37 
 -19  -3   1   10.66    0.70 
 -19  -3   1   10.33    0.73 
  19  -3  -1   10.11    0.75 
  19   3  -1   10.00    0.65 
  19   3  -1   10.63    0.70 
 -19   3   1   11.80    0.67 
 -19   3   1   11.00    0.77 
  19   3  -1   10.98    0.72 
 -19   3   1   10.42    0.73 
 -17  -3   1    0.57    0.11 
  17  -3  -1    0.42    0.12 
 -17  -3   1    0.57    0.09 
 -17   3   1    0.59    0.08 
  17   3  -1    0.58    0.07 
 -17   3   1    0.43    0.12 
  17   3  -1    0.50    0.10 
 -15  -3   1    6.52    0.46 
  15  -3  -1    6.01    0.47 
 -15  -3   1    6.73    0.43 
  15  -3  -1    6.58    0.44 
  15   3  -1    6.61    0.44 
  15   3  -1    6.44    0.40 
  15   3  -1    5.57    0.43 
 -15   3   1    6.83    0.48 
 -15   3   1    5.59    0.41 
 -15   3   1    6.45    0.41 
 -13  -3   1   26.09    1.56 
 -13  -3   1   24.96    1.52 
 -13  -3   1   24.30    1.54 
  13  -3  -1   24.76    1.54 
  13  -3  -1   24.62    1.57 
  13   3  -1   25.04    1.52 
 -13   3   1   26.90    1.57 
 -13   3   1   24.34    1.50 
  13   3  -1   26.85    1.54 
  13   3  -1   25.65    1.50 
 -11  -3   1    2.46    0.20 
  11  -3  -1    2.26    0.19 
 -11  -3   1    2.33    0.18 
  11  -3  -1    2.34    0.20 
 -11  -3   1    2.27    0.19 
 -11  -3   1    2.35    0.20 
 -11   3   1    2.10    0.20 
  11   3  -1    2.25    0.18 
 -11   3   1    2.15    0.17 
  11   3  -1    2.09    0.16 
  11   3  -1    1.85    0.15 
  -9  -3   1    1.64    0.16 
  -9  -3   1    1.56    0.14 
   9  -3  -1    1.65    0.15 
   9  -3  -1    1.62    0.15 
  -9  -3   1    1.67    0.15 
  -9  -3   1    1.57    0.16 
   9   3  -1    2.08    0.15 
   9   3  -1    1.96    0.13 
  -9   3   1    2.02    0.14 
  -9   3   1    2.05    0.17 
   9   3  -1    1.57    0.12 
  -7  -3   1   19.06    1.20 
  -7  -3   1   16.76    1.18 
   7  -3  -1   19.00    1.19 
   7  -3  -1   19.67    1.19 
  -7  -3   1   19.87    1.19 
  -7  -3   1   19.26    1.17 
  -7  -3   1   19.52    1.20 
   7   3  -1   21.32    1.18 
  -7   3   1   20.66    1.17 
   7   3  -1   21.21    1.17 
  -7   3   1   19.91    1.19 
   5  -3  -1   13.28    0.84 
  -5  -3   1   13.54    0.82 
   5  -3  -1   14.32    0.84 
  -5  -3   1   13.95    0.85 
  -5  -3   1   13.90    0.84 
   5  -3  -1   13.23    0.82 
  -5  -3   1   13.75    0.85 
  -5   3   1   14.18    0.81 
   5   3  -1   14.39    0.82 
  -5   3   1   12.26    0.82 
  -5   3   1   13.50    0.83 
   3  -3  -1   15.41    1.06 
   3  -3  -1   16.23    1.05 
  -3  -3   1   17.14    1.07 
  -3  -3   1   16.78    1.05 
  -3  -3   1   18.21    1.08 
   3  -3  -1   18.64    1.06 
  -3  -3   1   16.42    1.06 
   3  -3  -1   18.31    1.06 
   3   3  -1   19.54    1.05 
  -3   3   1   18.91    1.04 
  -3   3   1   17.26    1.06 
  -3   3   1   19.16    1.03 
   1  -3  -1   24.75    1.55 
  -1  -3   1   25.70    1.56 
   1  -3  -1   28.35    1.56 
  -1  -3   1   22.79    1.55 
   1  -3  -1   24.55    1.56 
  -1  -3   1   27.18    1.55 
  -1  -3   1   27.64    1.56 
   1  -3  -1   25.99    1.55 
   1   3  -1   28.01    1.54 
   1   3  -1   26.81    1.56 
  -1  -3  -1  186.59   10.92 
   1  -3   1  192.64   10.98 
  -1  -3  -1  190.02   10.94 
  -1  -3  -1  203.39   11.08 
  -1  -3  -1  163.20   10.88 
   1  -3   1  169.28   10.96 
   1  -3   1  201.40   10.99 
   1  -3   1  184.66   10.96 
  -1   3  -1  175.67   10.97 
  -1   3  -1  197.21   10.91 
  -3  -3  -1   45.12    2.60 
  -3  -3  -1   46.86    2.59 
  -3  -3  -1   43.72    2.59 
  -3  -3  -1   42.48    2.56 
   3  -3   1   44.90    2.59 
   3  -3   1   43.44    2.57 
  -3   3  -1   43.32    2.56 
  -3   3  -1   41.64    2.58 
   3   3   1   41.81    2.54 
   5  -3   1   13.67    0.79 
   5  -3   1   12.26    0.79 
  -5  -3  -1   13.82    0.79 
  -5  -3  -1   13.14    0.79 
  -5  -3  -1   12.15    0.76 
  -5  -3  -1   12.22    0.78 
   5  -3   1   12.45    0.77 
   5   3   1   12.30    0.76 
  -5   3  -1   12.65    0.76 
  -5   3  -1   12.99    0.79 
  -5   3  -1   10.68    0.75 
   5   3   1   12.56    0.74 
   7  -3   1    3.16    0.23 
  -7  -3  -1    3.08    0.23 
   7  -3   1    2.66    0.20 
  -7  -3  -1    2.53    0.21 
  -7  -3  -1    2.86    0.23 
  -7   3  -1    2.49    0.18 
   7   3   1    2.69    0.18 
  -7   3  -1    3.08    0.23 
   7   3   1    2.76    0.20 
  -7   3  -1    2.57    0.20 
  -9   3  -1    0.50    0.09 
  -9   3  -1    0.44    0.07 
   9   3   1    0.46    0.06 
  -9   3  -1    0.41    0.06 
   9   3   1    0.42    0.07 
  11  -3   1    0.43    0.11 
 -11   3  -1    0.13    0.06 
 -11   3  -1    0.30    0.10 
 -11   3  -1    0.15    0.11 
  11   3   1    0.19    0.07 
 -11   3  -1    0.17    0.05 
  11   3   1    0.17    0.05 
  13  -3   1   10.71    0.70 
 -13  -3  -1   10.62    0.68 
  13  -3   1    8.50    0.62 
 -13  -3  -1   11.30    0.68 
 -13   3  -1    8.79    0.65 
  13   3   1   10.72    0.66 
 -13   3  -1   10.77    0.72 
  13   3   1    9.49    0.63 
  13   3   1    9.40    0.63 
 -13   3  -1   10.27    0.62 
  15  -3   1    1.29    0.17 
  15  -3   1    0.95    0.11 
 -15  -3  -1    1.11    0.15 
 -15   3  -1    1.27    0.18 
  15   3   1    1.18    0.13 
  15   3   1    1.23    0.14 
 -15   3  -1    0.97    0.13 
  15   3   1    1.00    0.11 
 -15   3  -1    1.13    0.11 
 -17  -3  -1    7.09    0.54 
  17  -3   1    7.38    0.52 
  17  -3   1    8.80    0.59 
  17   3   1    6.77    0.46 
 -17   3  -1    7.46    0.59 
  17   3   1    7.21    0.50 
  17   3   1    7.55    0.52 
  17   3   1    6.90    0.47 
 -17   3  -1    7.84    0.47 
 -17   3  -1    7.59    0.52 
  19  -3   1    0.64    0.17 
  19   3   1    0.45    0.12 
  19   3   1    0.50    0.07 
 -19   3  -1    0.59    0.12 
 -19   3  -1    0.30    0.13 
 -19   3  -1    0.47    0.07 
  19   3   1    0.50    0.08 
  21  -3   1    9.21    0.82 
  21  -3   1   11.47    0.70 
 -21  -3  -1   10.53    0.69 
 -21  -3  -1   10.55    0.69 
  21  -3   1    9.61    0.70 
 -21   3  -1   12.40    0.74 
  21   3   1   11.08    0.83 
 -21   3  -1   11.61    0.67 
  21   3   1   12.26    0.73 
  21   3   1   10.38    0.69 
  21   3   1   11.50    0.67 
 -21   3  -1   11.13    0.69 
 -23  -3  -1    0.04    0.06 
  23  -3   1    0.07    0.07 
 -23  -3  -1    0.14    0.06 
  23  -3   1    0.14    0.07 
  23   3   1    0.02    0.08 
  23   3   1    0.02    0.04 
 -23   3  -1   -0.01    0.05 
 -23   3  -1   -0.03    0.05 
  23   3   1    0.02    0.06 
 -23   3  -1    0.00    0.06 
 -25  -3  -1    0.15    0.06 
  25  -3   1   -0.01    0.06 
  25  -3   1    0.12    0.07 
 -25  -3  -1    0.15    0.06 
  25   3   1    0.13    0.07 
 -25   3  -1    0.15    0.06 
 -25   3  -1    0.12    0.05 
 -27  -3  -1    0.35    0.07 
 -27  -3  -1    0.51    0.08 
  27  -3   1    0.52    0.09 
  27  -3   1    0.72    0.11 
  27   3   1    0.38    0.08 
 -27   3  -1    0.54    0.08 
 -27   3  -1    0.42    0.07 
 -29  -3  -1    0.18    0.05 
  29  -3   1    0.20    0.06 
 -29  -3  -1    0.19    0.05 
  29  -3   1    0.26    0.07 
  29   3   1    0.19    0.06 
 -29   3  -1    0.23    0.05 
 -31  -3  -1    0.15    0.04 
 -31  -3  -1    0.21    0.04 
  31  -3   1    0.18    0.05 
  31  -3   1    0.21    0.05 
 -31   3  -1    0.15    0.04 
  31   3   1    0.11    0.05 
  32  -4  -1    0.03    0.04 
 -32  -4   1    0.02    0.03 
  32  -4  -1    0.05    0.04 
 -32   4   1    0.11    0.04 
 -32   4   1    0.08    0.03 
  32   4  -1    0.11    0.04 
  30  -4  -1    0.69    0.10 
  30  -4  -1    0.59    0.09 
 -30  -4   1    0.49    0.07 
 -30  -4   1    0.47    0.07 
 -30   4   1    0.41    0.07 
 -30   4   1    0.50    0.06 
  30   4  -1    0.52    0.08 
  28  -4  -1    3.20    0.24 
 -28  -4   1    2.90    0.22 
  28  -4  -1    3.00    0.23 
 -28  -4   1    2.91    0.22 
 -28   4   1    3.02    0.22 
  28   4  -1    2.67    0.23 
 -28   4   1    2.98    0.21 
  26  -4  -1    0.63    0.11 
  26  -4  -1    0.68    0.11 
 -26  -4   1    0.66    0.10 
 -26  -4   1    0.62    0.10 
 -26   4   1    0.41    0.07 
 -26   4   1    0.42    0.08 
  24  -4  -1    3.83    0.29 
  24  -4  -1    3.98    0.31 
 -24  -4   1    3.71    0.28 
 -24  -4   1    3.48    0.29 
 -24   4   1    4.59    0.28 
 -24   4   1    3.42    0.32 
 -24   4   1    4.41    0.27 
  24   4  -1    3.95    0.30 
  22  -4  -1    1.11    0.16 
 -22  -4   1    1.20    0.15 
 -22  -4   1    1.35    0.15 
  22  -4  -1    1.51    0.16 
  22   4  -1    1.15    0.17 
 -22   4   1    1.04    0.18 
  22   4  -1    1.38    0.11 
 -22   4   1    1.47    0.11 
 -22   4   1    1.41    0.13 
 -22   4   1    1.40    0.14 
  22   4  -1    1.60    0.16 
 -20  -4   1    2.39    0.26 
 -20  -4   1    2.35    0.23 
  20  -4  -1    2.29    0.28 
 -20   4   1    2.81    0.20 
 -20   4   1    2.43    0.29 
 -20   4   1    3.07    0.22 
  20   4  -1    2.79    0.20 
  20   4  -1    2.81    0.26 
 -18  -4   1    9.93    0.74 
  18  -4  -1   10.21    0.78 
 -18  -4   1   11.51    0.71 
  18   4  -1   10.51    0.66 
 -18   4   1   11.09    0.68 
  18   4  -1   11.75    0.73 
 -18   4   1   10.61    0.77 
 -18   4   1   10.22    0.72 
 -18   4   1   10.60    0.66 
  18   4  -1   11.28    0.67 
 -16  -4   1   42.78    2.50 
  16  -4  -1   37.77    2.52 
 -16  -4   1   43.96    2.46 
 -16   4   1   37.19    2.45 
  16   4  -1   39.92    2.46 
 -16   4   1   43.75    2.53 
 -16   4   1   39.89    2.44 
  16   4  -1   44.30    2.48 
 -16   4   1   40.38    2.43 
 -14  -4   1   21.79    1.35 
  14  -4  -1   22.49    1.34 
 -14  -4   1   22.83    1.32 
  14  -4  -1   22.45    1.38 
 -14  -4   1   21.48    1.35 
  14   4  -1   21.00    1.32 
 -14   4   1   20.63    1.31 
 -14   4   1   22.23    1.37 
  14   4  -1   19.17    1.28 
 -14   4   1   19.69    1.29 
  14   4  -1   23.83    1.33 
  14   4  -1   20.84    1.30 
 -12  -4   1    8.17    0.49 
  12  -4  -1    8.52    0.53 
 -12  -4   1    7.86    0.52 
  12  -4  -1    7.73    0.50 
 -12   4   1    7.25    0.51 
  12   4  -1    7.36    0.49 
  12   4  -1    6.36    0.46 
 -12   4   1    6.28    0.46 
  12   4  -1    6.21    0.47 
 -10  -4   1    5.59    0.37 
  10  -4  -1    5.49    0.39 
 -10  -4   1    5.67    0.40 
 -10  -4   1    5.33    0.40 
  10  -4  -1    5.06    0.38 
  -8  -4   1    2.55    0.19 
   8  -4  -1    2.69    0.21 
  -8  -4   1    2.43    0.21 
  -8  -4   1    2.37    0.20 
   8  -4  -1    2.46    0.20 
  -8  -4   1    2.60    0.21 
   8   4  -1    2.29    0.19 
  -8   4   1    2.09    0.19 
  -8   4   1    2.38    0.17 
   8   4  -1    2.23    0.17 
  -6  -4   1   10.40    0.64 
  -6  -4   1   10.69    0.67 
   6  -4  -1   11.15    0.66 
  -6  -4   1   10.70    0.67 
  -6  -4   1    9.79    0.66 
   6  -4  -1   10.13    0.66 
   6   4  -1   10.09    0.63 
  -6   4   1   10.13    0.63 
  -6   4   1    9.96    0.64 
  -4  -4   1  139.06    8.13 
  -4  -4   1  144.44    8.14 
   4  -4  -1  128.46    8.12 
   4  -4  -1  139.79    8.12 
   4  -4  -1  151.63    8.13 
  -4  -4   1  143.28    8.14 
  -4  -4   1  129.65    8.10 
   4  -4  -1  128.85    8.11 
   4   4  -1  146.72    8.12 
  -4   4   1  139.03    8.10 
  -4   4   1  140.64    8.12 
  -2  -4   1  196.91   10.66 
   2  -4  -1  189.01   10.60 
  -2  -4   1  189.72   10.68 
   2  -4  -1  177.52   10.58 
  -2  -4   1  158.31   10.51 
  -2  -4   1  172.66   10.56 
   2  -4  -1  175.53   10.63 
  -2  -4   1  173.05   10.59 
   2  -4  -1  184.65   10.62 
   2   4  -1  192.62   10.61 
   0  -4   1   47.61    3.11 
   0  -4  -1   55.08    3.13 
   0  -4  -1   53.44    3.14 
   0  -4   1   45.68    3.10 
   0  -4   1   50.99    3.13 
   0  -4   1   53.59    3.13 
   0  -4   1   52.87    3.12 
   0  -4  -1   53.87    3.12 
   0  -4  -1   52.44    3.12 
   0   4  -1   56.69    3.13 
   0   4  -1   60.42    3.10 
   2  -4   1  175.82    9.89 
  -2  -4  -1  165.31    9.76 
  -2  -4  -1  163.97    9.74 
   2  -4   1  149.21    9.79 
  -2  -4  -1  168.81    9.83 
   2  -4   1  162.79    9.74 
  -2  -4  -1  175.77    9.78 
   2  -4   1  166.17    9.86 
  -2   4  -1  168.18    9.81 
  -2   4  -1  173.29    9.78 
   4  -4   1   52.03    3.60 
   4  -4   1   62.68    3.60 
  -4  -4  -1   61.35    3.62 
  -4  -4  -1   67.75    3.63 
  -4  -4  -1   60.41    3.59 
  -4  -4  -1   63.35    3.64 
   4  -4   1   62.99    3.62 
   4  -4   1   60.53    3.61 
   4   4   1   60.59    3.56 
  -4   4  -1   63.36    3.59 
  -4   4  -1   58.95    3.61 
  -6  -4  -1    2.90    0.25 
   6  -4   1    3.12    0.24 
  -6  -4  -1    3.82    0.28 
   6  -4   1    3.61    0.27 
  -6  -4  -1    3.55    0.27 
  -6   4  -1    3.22    0.23 
  -6   4  -1    3.55    0.27 
   6   4   1    3.23    0.21 
   6   4   1    3.17    0.24 
  -8  -4  -1   43.03    2.45 
   8  -4   1   38.76    2.41 
   8  -4   1   44.64    2.45 
  -8  -4  -1   41.54    2.45 
  -8   4  -1   35.72    2.38 
   8   4   1   40.14    2.41 
   8   4   1   39.93    2.38 
  -8   4  -1   39.31    2.40 
  -8   4  -1   42.43    2.45 
 -10  -4  -1    1.13    0.14 
 -10  -4  -1    1.18    0.15 
  10  -4   1    1.21    0.15 
  10   4   1    1.12    0.12 
 -10   4  -1    0.97    0.11 
  10   4   1    1.13    0.10 
 -10   4  -1    1.13    0.10 
 -10   4  -1    1.08    0.15 
 -12  -4  -1   24.17    1.41 
 -12  -4  -1   22.94    1.39 
  12  -4   1   23.15    1.42 
 -12   4  -1   22.61    1.33 
 -12   4  -1   19.38    1.33 
  12   4   1   23.28    1.34 
  12   4   1   19.74    1.33 
 -12   4  -1   22.08    1.42 
  12   4   1   22.85    1.37 
  14  -4   1   52.35    3.14 
 -14  -4  -1   50.94    3.09 
 -14  -4  -1   52.39    3.11 
 -14   4  -1   50.01    3.13 
  14   4   1   50.82    3.04 
  14   4   1   53.42    3.07 
 -14   4  -1   52.27    3.02 
  14   4   1   48.96    3.04 
 -16  -4  -1   17.76    1.22 
  16  -4   1   18.45    1.26 
 -16   4  -1   19.80    1.14 
  16   4   1   18.53    1.16 
 -16   4  -1   20.09    1.20 
  16   4   1   19.41    1.16 
 -16   4  -1   18.92    1.27 
  16   4   1   18.64    1.12 
  16   4   1   17.91    1.19 
 -18   4  -1    2.21    0.23 
  18   4   1    2.14    0.21 
  18   4   1    2.17    0.17 
 -18   4  -1    2.22    0.18 
  18   4   1    2.37    0.23 
 -18   4  -1    1.95    0.26 
  20  -4   1   24.22    1.54 
 -20  -4  -1   29.92    1.61 
 -20  -4  -1   26.65    1.53 
  20  -4   1   27.59    1.54 
 -20  -4  -1   26.56    1.52 
 -20   4  -1   24.73    1.52 
  20   4   1   23.74    1.53 
 -20   4  -1   26.03    1.58 
  20   4   1   24.81    1.63 
  20   4   1   25.79    1.50 
  20   4   1   25.82    1.51 
  20   4   1   22.37    1.64 
 -20   4  -1   22.30    1.51 
 -20   4  -1   25.49    1.50 
  22  -4   1   12.09    0.72 
 -22  -4  -1   11.67    0.71 
 -22  -4  -1   11.36    0.71 
  22  -4   1   11.12    0.72 
  22   4   1   10.77    0.70 
  22   4   1   10.95    0.71 
 -22   4  -1   11.01    0.76 
 -22   4  -1   11.93    0.69 
 -22   4  -1   11.01    0.69 
  22   4   1   11.49    0.68 
 -24  -4  -1    0.46    0.08 
  24  -4   1    0.45    0.10 
 -24  -4  -1    0.52    0.09 
  24  -4   1    0.37    0.09 
 -24   4  -1    0.59    0.08 
  24   4   1    0.63    0.10 
 -24   4  -1    0.53    0.08 
  24   4   1    0.53    0.07 
  26  -4   1    0.09    0.06 
  26  -4   1    0.03    0.05 
 -26  -4  -1    0.05    0.05 
 -26  -4  -1    0.08    0.06 
 -26   4  -1    0.01    0.04 
 -26   4  -1    0.00    0.04 
  26   4   1    0.06    0.06 
 -28  -4  -1   -0.03    0.04 
 -28  -4  -1    0.02    0.04 
  28  -4   1    0.06    0.05 
  28  -4   1   -0.01    0.05 
 -28   4  -1    0.00    0.04 
  28   4   1    0.01    0.05 
  30  -4   1    0.08    0.05 
  30  -4   1    0.15    0.05 
 -30  -4  -1    0.10    0.04 
 -30  -4  -1    0.09    0.04 
 -30   4  -1    0.17    0.04 
  30   4   1    0.07    0.04 
  31  -5  -1    0.28    0.06 
 -31  -5   1    0.35    0.05 
  31  -5  -1    0.35    0.06 
  31   5  -1    0.29    0.06 
 -31   5   1    0.36    0.05 
 -31   5   1    0.35    0.05 
 -29  -5   1    0.48    0.07 
  29  -5  -1    0.49    0.08 
  29  -5  -1    0.45    0.08 
 -29  -5   1    0.43    0.07 
 -29   5   1    0.42    0.06 
  29   5  -1    0.45    0.08 
 -29   5   1    0.42    0.06 
  27  -5  -1    1.34    0.14 
 -27  -5   1    1.24    0.13 
  27  -5  -1    1.43    0.14 
 -27  -5   1    1.29    0.13 
 -27   5   1    1.18    0.12 
 -27   5   1    1.19    0.11 
  27   5  -1    1.22    0.14 
 -25  -5   1    3.89    0.28 
  25  -5  -1    4.29    0.29 
  25  -5  -1    4.03    0.30 
 -25  -5   1    4.03    0.28 
 -25   5   1    3.57    0.26 
  25   5  -1    3.54    0.29 
  25   5  -1    3.66    0.28 
 -25   5   1    3.67    0.27 
  23  -5  -1    2.49    0.23 
 -23  -5   1    3.00    0.24 
 -23  -5   1    2.76    0.23 
  23  -5  -1    3.10    0.26 
 -23  -5   1    2.74    0.23 
 -23   5   1    3.04    0.21 
  23   5  -1    2.73    0.24 
 -23   5   1    3.46    0.22 
  23   5  -1    2.97    0.20 
 -23   5   1    3.01    0.20 
 -21  -5   1   20.02    1.23 
  21  -5  -1   20.08    1.22 
 -21  -5   1   19.20    1.22 
 -21  -5   1   20.51    1.22 
  21  -5  -1   19.47    1.24 
  21   5  -1   19.85    1.21 
 -21   5   1   20.05    1.20 
  21   5  -1   20.22    1.23 
  21   5  -1   20.68    1.19 
 -21   5   1   19.85    1.20 
 -21   5   1   20.75    1.19 
  19  -5  -1    0.21    0.12 
 -19  -5   1    0.24    0.11 
 -19   5   1    0.24    0.12 
 -19   5   1    0.32    0.10 
  19   5  -1    0.30    0.06 
 -19   5   1    0.43    0.07 
 -19   5   1    0.40    0.09 
  19   5  -1    0.43    0.07 
  19   5  -1    0.18    0.08 
 -17  -5   1    2.93    0.28 
  17  -5  -1    2.13    0.27 
 -17  -5   1    2.79    0.24 
  17   5  -1    2.62    0.24 
 -17   5   1    2.43    0.22 
  17   5  -1    2.76    0.19 
 -17   5   1    2.69    0.22 
  17   5  -1    2.19    0.19 
  17   5  -1    2.67    0.24 
 -17   5   1    2.82    0.19 
 -17   5   1    2.39    0.27 
 -15  -5   1    3.17    0.24 
  15  -5  -1    2.92    0.29 
 -15  -5   1    2.75    0.28 
  15   5  -1    2.61    0.23 
 -15   5   1    2.45    0.27 
  15   5  -1    2.66    0.24 
  15   5  -1    2.79    0.22 
 -15   5   1    2.74    0.23 
 -15   5   1    2.77    0.22 
  13  -5  -1    3.79    0.34 
  13  -5  -1    4.31    0.33 
 -13  -5   1    4.42    0.31 
 -13  -5   1    4.50    0.35 
 -13  -5   1    4.26    0.35 
 -13   5   1    4.30    0.30 
  13   5  -1    3.98    0.31 
 -13   5   1    3.82    0.28 
  13   5  -1    3.81    0.28 
 -13   5   1    3.78    0.34 
  13   5  -1    3.81    0.30 
  11  -5  -1    6.35    0.46 
 -11  -5   1    7.16    0.48 
 -11  -5   1    6.49    0.47 
  11  -5  -1    6.30    0.45 
 -11  -5   1    6.74    0.43 
  11   5  -1    5.59    0.42 
  11   5  -1    5.97    0.40 
 -11   5   1    6.15    0.45 
 -11   5   1    5.48    0.39 
  11   5  -1    6.34    0.43 
 -11   5   1    5.80    0.41 
  -9  -5   1   10.50    0.70 
   9  -5  -1   10.21    0.68 
  -9  -5   1   10.70    0.70 
   9  -5  -1    9.42    0.68 
  -9  -5   1    9.90    0.66 
  -9   5   1   10.70    0.65 
  -9   5   1   10.75    0.68 
   9   5  -1    9.35    0.65 
   9   5  -1   10.99    0.67 
   9   5  -1   10.62    0.64 
  -7  -5   1    0.01    0.04 
  -7  -5   1   -0.01    0.05 
  -7  -5   1    0.01    0.06 
   7  -5  -1    0.07    0.06 
   7   5  -1    0.05    0.03 
  -7   5   1    0.05    0.04 
   5  -5  -1    0.12    0.06 
  -5  -5   1    0.09    0.04 
  -5  -5   1    0.09    0.06 
  -5  -5   1    0.12    0.08 
  -5   5   1    0.09    0.04 
   5   5  -1    0.16    0.04 
  -3  -5   1    8.93    0.62 
  -3  -5   1   10.27    0.67 
   3  -5  -1   11.09    0.65 
   3  -5  -1    9.38    0.65 
  -3  -5   1    9.23    0.65 
  -3  -5   1   10.00    0.65 
   3  -5  -1    9.77    0.65 
   3   5  -1   10.82    0.62 
  -3   5   1   11.02    0.60 
  -1  -5   1    5.06    0.39 
  -1  -5   1    5.91    0.38 
   1  -5  -1    5.42    0.40 
   1  -5  -1    5.26    0.39 
  -1  -5   1    5.43    0.40 
   1  -5  -1    5.41    0.38 
   1  -5  -1    5.78    0.38 
  -1  -5   1    5.12    0.37 
  -1   5   1    5.99    0.33 
   1   5  -1    6.20    0.36 
   1  -5   1   20.14    1.20 
   1  -5   1   19.21    1.22 
  -1  -5  -1   20.59    1.20 
  -1  -5  -1   19.14    1.21 
  -1  -5  -1   21.11    1.24 
   1  -5   1   18.69    1.22 
  -1  -5  -1   17.61    1.21 
  -1   5  -1   20.49    1.21 
  -1   5  -1   20.45    1.18 
  -3  -5  -1   73.44    4.65 
  -3  -5  -1   78.35    4.66 
  -3  -5  -1   83.06    4.65 
  -3  -5  -1   80.18    4.62 
   3  -5   1   72.37    4.64 
   3  -5   1   71.08    4.63 
   3  -5   1   80.42    4.63 
   3   5   1   80.70    4.58 
  -3   5  -1   84.31    4.64 
  -3   5  -1   83.27    4.60 
   5  -5   1    1.51    0.15 
  -5  -5  -1    1.42    0.14 
  -5  -5  -1    1.61    0.17 
  -5  -5  -1    1.56    0.18 
   5  -5   1    1.55    0.17 
   5   5   1    1.80    0.12 
  -5   5  -1    1.81    0.14 
   5   5   1    1.75    0.15 
  -5   5  -1    1.90    0.17 
  -7  -5  -1    4.22    0.33 
  -7  -5  -1    3.86    0.33 
   7  -5   1    4.04    0.30 
   7  -5   1    4.09    0.33 
  -7   5  -1    3.99    0.32 
  -7   5  -1    4.03    0.29 
   7   5   1    4.16    0.26 
   7   5   1    4.03    0.29 
   9  -5   1    2.02    0.21 
  -9  -5  -1    2.40    0.22 
  -9  -5  -1    1.75    0.20 
   9  -5   1    1.67    0.17 
   9   5   1    1.66    0.15 
  -9   5  -1    2.28    0.21 
  -9   5  -1    1.86    0.17 
   9   5   1    2.06    0.15 
  -9   5  -1    1.87    0.16 
   9   5   1    1.99    0.18 
 -11  -5  -1    0.12    0.07 
 -11  -5  -1    0.29    0.10 
  11  -5   1    0.20    0.09 
 -11   5  -1    0.10    0.05 
 -11   5  -1    0.09    0.05 
 -11   5  -1    0.17    0.09 
  11   5   1    0.15    0.05 
  11   5   1    0.17    0.05 
  11   5   1    0.20    0.07 
 -11   5  -1    0.17    0.06 
 -13  -5  -1    0.40    0.13 
 -13  -5  -1    0.27    0.10 
  13  -5   1    0.28    0.11 
  13   5   1    0.44    0.07 
 -13   5  -1    0.53    0.15 
 -13   5  -1    0.40    0.08 
 -13   5  -1    0.45    0.09 
  13   5   1    0.40    0.08 
  13   5   1    0.52    0.10 
  15  -5   1    8.33    0.67 
 -15  -5  -1    7.66    0.63 
 -15  -5  -1    8.98    0.64 
 -15   5  -1    8.77    0.56 
 -15   5  -1    8.43    0.54 
  15   5   1    8.08    0.54 
  15   5   1    9.08    0.57 
  15   5   1    9.18    0.61 
 -15   5  -1    9.24    0.69 
  15   5   1    9.61    0.58 
  17  -5   1    4.17    0.42 
 -17  -5  -1    3.99    0.39 
  17   5   1    4.69    0.34 
  17   5   1    4.84    0.31 
 -17   5  -1    4.90    0.32 
 -17   5  -1    4.42    0.44 
  17   5   1    5.19    0.36 
  17   5   1    4.41    0.37 
 -19  -5  -1   11.50    0.70 
  19  -5   1   12.05    0.70 
 -19  -5  -1   11.45    0.70 
 -19  -5  -1   11.12    0.70 
 -19   5  -1   10.14    0.67 
  19   5   1   11.33    0.73 
 -19   5  -1   10.92    0.75 
 -19   5  -1   10.60    0.67 
 -19   5  -1   10.32    0.65 
  19   5   1   10.63    0.66 
  19   5   1   11.69    0.68 
  19   5   1    9.97    0.69 
 -21  -5  -1    1.74    0.17 
  21  -5   1    1.92    0.18 
 -21  -5  -1    1.83    0.18 
  21  -5   1    1.31    0.17 
 -21  -5  -1    1.74    0.17 
  21   5   1    2.14    0.18 
 -21   5  -1    1.95    0.15 
  21   5   1    1.70    0.24 
  21   5   1    1.84    0.14 
 -21   5  -1    1.28    0.19 
 -21   5  -1    1.66    0.15 
  21   5   1    1.60    0.15 
  23  -5   1    0.53    0.10 
 -23  -5  -1    0.53    0.09 
 -23  -5  -1    0.53    0.10 
  23  -5   1    0.45    0.09 
 -23  -5  -1    0.51    0.09 
  23   5   1    0.53    0.10 
 -23   5  -1    0.51    0.08 
 -23   5  -1    0.61    0.08 
  23   5   1    0.54    0.07 
  23   5   1    0.60    0.09 
  25  -5   1    0.20    0.07 
 -25  -5  -1    0.15    0.06 
 -25  -5  -1    0.15    0.06 
  25  -5   1    0.18    0.07 
 -25   5  -1    0.25    0.06 
  25   5   1    0.21    0.07 
 -25   5  -1    0.23    0.05 
  25   5   1    0.19    0.04 
 -27  -5  -1    0.01    0.04 
  27  -5   1    0.03    0.05 
  27  -5   1   -0.04    0.05 
 -27  -5  -1   -0.05    0.04 
 -27   5  -1   -0.01    0.04 
  27   5   1    0.01    0.05 
  29  -5   1    0.32    0.06 
 -29  -5  -1    0.31    0.05 
 -29  -5  -1    0.33    0.05 
  29  -5   1    0.33    0.06 
  29   5   1    0.37    0.06 
 -29   5  -1    0.36    0.05 
  30  -6  -1    0.61    0.07 
 -30  -6   1    0.70    0.07 
  30  -6  -1    0.65    0.08 
  30   6  -1    0.59    0.08 
 -30   6   1    0.63    0.06 
 -30   6   1    0.58    0.07 
  28  -6  -1    1.73    0.15 
  28  -6  -1    1.71    0.15 
 -28  -6   1    1.98    0.15 
 -28  -6   1    1.67    0.15 
 -28   6   1    1.90    0.14 
  28   6  -1    1.59    0.14 
 -28   6   1    1.71    0.13 
  28   6  -1    1.77    0.15 
  26  -6  -1    0.34    0.07 
 -26  -6   1    0.43    0.08 
  26  -6  -1    0.47    0.09 
 -26  -6   1    0.34    0.08 
 -26  -6   1    0.45    0.08 
 -26   6   1    0.45    0.07 
  26   6  -1    0.39    0.08 
 -26   6   1    0.42    0.06 
  24  -6  -1    3.44    0.27 
 -24  -6   1    3.42    0.26 
 -24  -6   1    3.59    0.26 
  24  -6  -1    3.33    0.25 
 -24  -6   1    3.44    0.26 
 -24   6   1    3.26    0.22 
  24   6  -1    3.39    0.22 
 -24   6   1    3.34    0.23 
 -24   6   1    3.64    0.24 
  24   6  -1    3.26    0.27 
 -22  -6   1    1.76    0.19 
 -22  -6   1    2.02    0.19 
 -22  -6   1    1.76    0.18 
  22  -6  -1    2.06    0.18 
  22  -6  -1    1.38    0.18 
  22   6  -1    1.90    0.14 
 -22   6   1    1.76    0.18 
 -22   6   1    2.06    0.14 
  22   6  -1    2.05    0.19 
  22   6  -1    1.65    0.15 
 -22   6   1    1.88    0.15 
 -20  -6   1    0.66    0.11 
  20  -6  -1    0.65    0.10 
  20  -6  -1    0.64    0.12 
 -20  -6   1    0.68    0.11 
 -20  -6   1    0.65    0.11 
 -20   6   1    0.46    0.08 
  20   6  -1    0.55    0.09 
 -20   6   1    0.51    0.07 
 -20   6   1    0.63    0.09 
  20   6  -1    0.51    0.07 
  20   6  -1    0.58    0.11 
 -18  -6   1    0.45    0.13 
 -18   6   1    0.33    0.18 
 -18   6   1    0.58    0.11 
  18   6  -1    0.54    0.08 
  18   6  -1    0.45    0.13 
 -18   6   1    0.50    0.08 
 -16  -6   1    0.76    0.15 
  16  -6  -1    0.84    0.21 
 -16  -6   1    0.89    0.16 
 -16  -6   1    0.83    0.12 
 -16   6   1    0.57    0.16 
  16   6  -1    0.58    0.12 
  16   6  -1    0.67    0.09 
 -16   6   1    0.75    0.08 
 -16   6   1    0.68    0.11 
  16   6  -1    0.70    0.11 
 -16   6   1    0.71    0.11 
 -14  -6   1    0.27    0.12 
  14   6  -1    0.47    0.07 
 -14   6   1    0.54    0.09 
  14   6  -1    0.52    0.11 
 -14   6   1    0.52    0.07 
  14   6  -1    0.53    0.10 
  14   6  -1    0.62    0.09 
 -14   6   1    0.70    0.10 
 -14   6   1    0.52    0.14 
 -12  -6   1   22.62    1.31 
 -12  -6   1   21.19    1.30 
  12  -6  -1   20.42    1.30 
 -12  -6   1   21.44    1.25 
  12  -6  -1   19.56    1.28 
  12   6  -1   19.80    1.25 
 -12   6   1   19.80    1.23 
  12   6  -1   20.09    1.22 
 -12   6   1   17.53    1.26 
 -12   6   1   19.10    1.21 
  12   6  -1   18.85    1.23 
 -10  -6   1   39.88    2.28 
 -10  -6   1   37.76    2.28 
  10  -6  -1   37.90    2.26 
 -10  -6   1   39.47    2.23 
 -10   6   1   34.04    2.19 
  10   6  -1   33.39    2.20 
 -10   6   1   35.41    2.24 
 -10   6   1   36.90    2.21 
  10   6  -1   38.21    2.23 
  10   6  -1   37.63    2.19 
  -8  -6   1    5.98    0.42 
   8  -6  -1    5.70    0.45 
  -8  -6   1    5.77    0.46 
  -8  -6   1    6.01    0.47 
   8   6  -1    6.86    0.40 
  -8   6   1    6.73    0.41 
  -8   6   1    5.77    0.39 
   8   6  -1    6.04    0.41 
  -6  -6   1   11.36    0.77 
  -6  -6   1   11.03    0.76 
  -6  -6   1   10.32    0.71 
   6  -6  -1   11.96    0.76 
  -6   6   1   11.92    0.70 
   6   6  -1   11.67    0.70 
  -4  -6   1   10.60    0.73 
  -4  -6   1   10.13    0.70 
   4  -6  -1   11.40    0.71 
  -4   6   1   10.96    0.65 
   4   6  -1   10.72    0.66 
   2  -6  -1    1.96    0.18 
  -2  -6   1    2.02    0.21 
  -2  -6   1    1.88    0.18 
   2  -6  -1    2.04    0.20 
   0  -6   1    0.50    0.13 
   0  -6   1    0.42    0.08 
   0  -6  -1    0.45    0.10 
   0  -6  -1    0.60    0.12 
   0  -6  -1    0.43    0.13 
  -2  -6  -1    2.64    0.22 
  -2  -6  -1    2.57    0.21 
  -2  -6  -1    2.40    0.24 
   2  -6   1    2.22    0.23 
   2  -6   1    2.65    0.22 
  -4  -6  -1   30.71    1.76 
  -4  -6  -1   26.81    1.70 
  -4  -6  -1   28.89    1.73 
   4  -6   1   29.19    1.72 
   4   6   1   28.24    1.65 
  -4   6  -1   28.71    1.68 
  -4   6  -1   28.23    1.72 
  -4   6  -1   24.50    1.67 
  -6  -6  -1   35.04    2.13 
  -6  -6  -1   36.49    2.15 
   6  -6   1   36.37    2.11 
   6   6   1   34.38    2.04 
  -6   6  -1   34.85    2.12 
  -6   6  -1   31.02    2.06 
  -6   6  -1   35.70    2.07 
   6   6   1   34.68    2.09 
  -8  -6  -1    6.68    0.53 
  -8  -6  -1    6.58    0.53 
   8  -6   1    6.30    0.50 
   8  -6   1    6.85    0.53 
   8   6   1    8.27    0.45 
   8   6   1    8.05    0.50 
  -8   6  -1    7.64    0.48 
   8   6   1    6.03    0.44 
  -8   6  -1    8.06    0.53 
  -8   6  -1    7.23    0.47 
  10  -6   1    3.47    0.31 
 -10  -6  -1    3.15    0.30 
 -10  -6  -1    3.39    0.30 
 -10   6  -1    2.91    0.25 
  10   6   1    2.80    0.22 
 -10   6  -1    3.10    0.24 
 -10   6  -1    3.22    0.30 
  10   6   1    3.14    0.23 
  10   6   1    3.07    0.26 
 -12  -6  -1    0.89    0.15 
  12  -6   1    0.80    0.19 
 -12  -6  -1    0.71    0.14 
  12   6   1    0.56    0.08 
  12   6   1    0.60    0.09 
 -12   6  -1    0.42    0.07 
 -12   6  -1    0.60    0.10 
  12   6   1    0.73    0.12 
 -12   6  -1    0.57    0.10 
 -12   6  -1    0.64    0.13 
  14  -6   1    1.53    0.22 
 -14  -6  -1    1.56    0.21 
  14   6   1    1.16    0.11 
  14   6   1    1.40    0.14 
 -14   6  -1    1.18    0.11 
  14   6   1    1.22    0.13 
 -14   6  -1    1.11    0.12 
 -14   6  -1    1.33    0.15 
 -14   6  -1    1.32    0.20 
  14   6   1    1.42    0.17 
 -16  -6  -1    0.39    0.16 
  16   6   1    0.42    0.12 
  16   6   1    0.65    0.10 
 -16   6  -1    0.66    0.10 
  16   6   1    0.70    0.12 
 -16   6  -1    0.86    0.09 
  16   6   1    0.80    0.09 
 -18  -6  -1    8.44    0.58 
 -18  -6  -1    9.37    0.59 
  18  -6   1    8.84    0.58 
 -18  -6  -1    9.56    0.59 
 -18  -6  -1   10.20    0.71 
 -18   6  -1    8.46    0.56 
  18   6   1    9.76    0.56 
  18   6   1    8.01    0.54 
  18   6   1    9.51    0.62 
 -18   6  -1    8.34    0.55 
 -18   6  -1    8.62    0.54 
 -20  -6  -1    1.97    0.19 
 -20  -6  -1    1.99    0.19 
 -20  -6  -1    2.04    0.19 
  20  -6   1    1.93    0.19 
 -20  -6  -1    2.17    0.22 
  20   6   1    2.06    0.15 
 -20   6  -1    1.94    0.22 
 -20   6  -1    1.86    0.14 
 -20   6  -1    1.95    0.16 
  20   6   1    2.41    0.17 
  20   6   1    2.09    0.22 
 -20   6  -1    2.04    0.16 
  20   6   1    1.95    0.19 
  22  -6   1    5.08    0.36 
 -22  -6  -1    5.15    0.36 
 -22  -6  -1    5.15    0.36 
 -22  -6  -1    4.72    0.36 
 -22  -6  -1    4.27    0.41 
 -22   6  -1    4.72    0.33 
 -22   6  -1    5.70    0.34 
  22   6   1    5.40    0.35 
  22   6   1    5.39    0.36 
 -22   6  -1    5.21    0.34 
  22   6   1    5.59    0.33 
  24  -6   1    0.37    0.08 
 -24  -6  -1    0.32    0.08 
 -24  -6  -1    0.35    0.08 
 -24  -6  -1    0.33    0.08 
 -24   6  -1    0.41    0.06 
  24   6   1    0.54    0.06 
 -24   6  -1    0.50    0.07 
  24   6   1    0.49    0.09 
 -26  -6  -1    0.32    0.06 
 -26  -6  -1    0.27    0.06 
  26  -6   1    0.30    0.07 
 -26   6  -1    0.32    0.05 
  26   6   1    0.31    0.07 
  26   6   1    0.28    0.04 
  28  -6   1    0.22    0.05 
 -28  -6  -1    0.20    0.05 
 -28  -6  -1    0.28    0.05 
 -28   6  -1    0.14    0.04 
  28   6   1    0.13    0.05 
 -29  -7   1    0.11    0.04 
  29   7  -1    0.10    0.05 
 -29   7   1    0.17    0.03 
  29   7  -1    0.16    0.04 
 -29   7   1    0.10    0.04 
 -27  -7   1    0.32    0.06 
 -27  -7   1    0.39    0.07 
 -27   7   1    0.40    0.05 
  27   7  -1    0.32    0.06 
 -27   7   1    0.40    0.06 
  27   7  -1    0.34    0.07 
 -25  -7   1    0.85    0.12 
  25  -7  -1    0.96    0.11 
 -25  -7   1    1.00    0.12 
 -25  -7   1    0.92    0.12 
 -25   7   1    1.15    0.10 
 -25   7   1    1.04    0.10 
 -25   7   1    1.01    0.11 
  25   7  -1    1.07    0.09 
  25   7  -1    1.18    0.13 
  23  -7  -1    0.14    0.06 
 -23  -7   1    0.07    0.06 
 -23  -7   1    0.06    0.06 
 -23  -7   1    0.06    0.06 
  23   7  -1    0.14    0.04 
 -23   7   1    0.12    0.04 
  23   7  -1    0.17    0.07 
 -23   7   1    0.17    0.05 
 -21  -7   1    0.94    0.13 
  21  -7  -1    0.99    0.13 
  21  -7  -1    0.93    0.12 
 -21  -7   1    1.17    0.14 
 -21  -7   1    1.03    0.14 
 -21   7   1    0.79    0.10 
 -21   7   1    1.04    0.09 
  21   7  -1    0.94    0.11 
  21   7  -1    1.00    0.09 
 -21   7   1    0.86    0.10 
  21   7  -1    1.26    0.14 
 -19  -7   1    0.60    0.12 
 -19  -7   1    0.67    0.11 
  19  -7  -1    0.60    0.10 
 -19  -7   1    0.52    0.11 
 -19  -7   1    0.62    0.11 
 -19   7   1    0.83    0.13 
  19   7  -1    0.94    0.10 
  19   7  -1    0.95    0.14 
  19   7  -1    0.76    0.14 
 -19   7   1    0.74    0.09 
 -19   7   1    0.86    0.09 
  19   7  -1    0.87    0.09 
 -19   7   1    0.92    0.08 
 -17  -7   1    0.12    0.08 
 -17  -7   1    0.16    0.08 
  17  -7  -1    0.11    0.07 
 -17  -7   1    0.07    0.07 
 -17  -7   1    0.09    0.07 
 -17   7   1    0.29    0.06 
  17   7  -1    0.20    0.08 
 -17   7   1    0.27    0.08 
  17   7  -1    0.20    0.09 
  17   7  -1    0.22    0.06 
 -17   7   1    0.28    0.05 
  17   7  -1    0.29    0.05 
 -15  -7   1    0.73    0.16 
  15  -7  -1    0.86    0.15 
 -15  -7   1    0.82    0.16 
 -15   7   1    0.77    0.12 
 -15   7   1    0.90    0.12 
  15   7  -1    0.70    0.11 
  15   7  -1    0.78    0.13 
 -15   7   1    0.86    0.09 
  15   7  -1    0.75    0.10 
 -13  -7   1    0.11    0.09 
 -13  -7   1    0.05    0.09 
  13  -7  -1    0.15    0.10 
  13   7  -1    0.08    0.04 
  13   7  -1    0.20    0.06 
 -13   7   1    0.09    0.03 
  13   7  -1    0.06    0.06 
 -13   7   1    0.07    0.05 
 -13   7   1    0.10    0.05 
 -11  -7   1    2.90    0.30 
 -11  -7   1    3.05    0.30 
  11  -7  -1    2.73    0.27 
  11   7  -1    2.85    0.25 
 -11   7   1    2.65    0.22 
 -11   7   1    2.88    0.21 
  11   7  -1    2.76    0.21 
  11   7  -1    2.29    0.19 
  -9  -7   1   12.07    0.87 
   9  -7  -1   12.81    0.86 
  -9  -7   1   13.57    0.88 
   9   7  -1   12.62    0.78 
  -9   7   1   12.50    0.79 
   9   7  -1   12.26    0.82 
  -9   7   1   12.33    0.78 
  -7  -7   1    9.13    0.71 
   7  -7  -1    9.46    0.70 
  -7  -7   1    9.59    0.73 
  -7   7   1   11.32    0.65 
  -7   7   1    9.69    0.63 
   7   7  -1   10.97    0.67 
   7   7  -1   11.73    0.65 
  -5  -7   1   14.88    0.96 
  -5  -7   1   12.83    0.92 
   5  -7  -1   13.90    0.92 
  -5   7   1   14.59    0.85 
   5   7  -1   13.67    0.87 
   5   7  -1   14.47    0.86 
   3  -7  -1   36.79    2.18 
  -3  -7   1   38.10    2.23 
   3   7  -1   36.52    2.13 
  -3   7   1   35.08    2.11 
   3   7  -1   33.06    2.13 
   1  -7  -1    6.71    0.53 
  -1  -7   1    7.45    0.56 
   1  -7  -1    7.58    0.52 
  -1  -7   1    7.26    0.52 
   1   7  -1    7.77    0.48 
   1   7  -1    7.54    0.48 
  -1   7   1    7.54    0.46 
  -1  -7  -1    2.90    0.29 
  -1  -7  -1    3.53    0.27 
   1  -7   1    3.47    0.28 
   1  -7   1    2.95    0.30 
  -1   7  -1    3.05    0.24 
  -1   7  -1    3.52    0.24 
   1   7   1    3.39    0.22 
   3  -7   1    4.07    0.33 
  -3  -7  -1    4.24    0.36 
  -3  -7  -1    3.85    0.33 
  -3  -7  -1    3.98    0.31 
  -3   7  -1    3.95    0.29 
  -3   7  -1    4.00    0.29 
   3   7   1    4.13    0.26 
  -3   7  -1    4.12    0.32 
  -5  -7  -1   12.50    0.85 
  -5  -7  -1   11.91    0.82 
   5  -7   1   12.20    0.81 
  -5   7  -1   12.96    0.77 
   5   7   1   12.08    0.79 
   5   7   1   12.71    0.73 
  -5   7  -1   11.46    0.76 
  -5   7  -1   11.37    0.79 
  -7  -7  -1   17.44    1.05 
  -7  -7  -1   16.12    1.03 
   7  -7   1   15.86    1.00 
   7   7   1   12.95    0.95 
   7   7   1   15.60    0.93 
  -7   7  -1   14.62    1.00 
  -7   7  -1   14.75    0.95 
  -7   7  -1   15.19    0.96 
   7   7   1   16.11    0.98 
  -9  -7  -1   12.27    0.80 
  -9  -7  -1   11.82    0.80 
   9  -7   1   10.92    0.75 
   9   7   1   10.08    0.68 
  -9   7  -1   11.49    0.71 
   9   7   1   11.63    0.69 
   9   7   1   10.80    0.73 
  -9   7  -1   10.61    0.67 
  -9   7  -1   10.52    0.72 
  -9   7  -1   10.54    0.76 
 -11  -7  -1    6.74    0.52 
 -11  -7  -1    6.35    0.52 
 -11   7  -1    6.09    0.50 
  11   7   1    6.04    0.46 
 -11   7  -1    6.43    0.43 
 -11   7  -1    5.78    0.45 
  11   7   1    6.46    0.42 
 -11   7  -1    6.05    0.39 
  11   7   1    6.31    0.42 
  13  -7   1    7.42    0.64 
 -13  -7  -1    7.89    0.62 
 -13  -7  -1    8.38    0.64 
  13   7   1    8.42    0.54 
  13   7   1    7.67    0.57 
  13   7   1    8.75    0.55 
  13   7   1    7.68    0.50 
 -13   7  -1    8.81    0.51 
 -13   7  -1    8.41    0.55 
 -13   7  -1    7.49    0.62 
 -15  -7  -1   11.18    0.73 
 -15  -7  -1   11.51    0.74 
  15  -7   1   10.80    0.71 
 -15  -7  -1   10.49    0.72 
  15  -7   1   11.80    0.73 
 -15   7  -1   11.60    0.69 
 -15   7  -1    9.53    0.77 
 -15   7  -1   11.74    0.75 
  15   7   1   12.27    0.70 
 -15   7  -1   12.79    0.71 
 -15   7  -1   11.19    0.70 
  15   7   1   12.64    0.76 
 -17  -7  -1    2.52    0.22 
 -17  -7  -1    2.37    0.24 
 -17  -7  -1    2.37    0.21 
  17  -7   1    2.18    0.19 
 -17  -7  -1    2.28    0.20 
  17  -7   1    2.13    0.20 
 -17   7  -1    2.04    0.15 
  17   7   1    2.05    0.17 
  17   7   1    2.29    0.22 
 -17   7  -1    1.90    0.17 
 -17   7  -1    1.91    0.16 
 -19  -7  -1    0.25    0.09 
 -19  -7  -1    0.26    0.09 
 -19  -7  -1    0.29    0.08 
  19  -7   1    0.34    0.08 
 -19  -7  -1    0.28    0.10 
  19   7   1    0.33    0.07 
 -19   7  -1    0.39    0.07 
 -19   7  -1    0.31    0.05 
  19   7   1    0.33    0.10 
  19   7   1    0.36    0.05 
 -19   7  -1    0.27    0.06 
 -21  -7  -1    1.69    0.17 
  21  -7   1    1.76    0.16 
 -21  -7  -1    1.59    0.19 
 -21  -7  -1    1.82    0.17 
 -21  -7  -1    1.70    0.17 
  21   7   1    1.61    0.18 
 -21   7  -1    1.93    0.14 
 -21   7  -1    1.64    0.14 
  21   7   1    1.73    0.13 
  21   7   1    1.73    0.15 
 -21   7  -1    1.50    0.13 
  23  -7   1    1.41    0.14 
 -23  -7  -1    1.31    0.16 
 -23  -7  -1    1.41    0.14 
 -23  -7  -1    1.57    0.15 
 -23  -7  -1    1.43    0.14 
  23   7   1    1.49    0.11 
 -23   7  -1    1.23    0.12 
  23   7   1    1.31    0.12 
 -23   7  -1    1.26    0.12 
 -23   7  -1    1.47    0.12 
  23   7   1    1.34    0.14 
 -25  -7  -1    1.71    0.14 
 -25  -7  -1    1.68    0.15 
 -25  -7  -1    1.37    0.13 
  25  -7   1    1.65    0.14 
 -25   7  -1    1.59    0.12 
  25   7   1    1.62    0.14 
  25   7   1    1.70    0.12 
 -27  -7  -1    1.14    0.10 
 -27  -7  -1    1.08    0.10 
  27  -7   1    1.08    0.10 
  27   7   1    0.96    0.10 
 -27   7  -1    1.09    0.09 
 -26  -8   1    0.22    0.05 
 -26  -8   1    0.24    0.05 
 -26  -8   1    0.25    0.05 
 -26   8   1    0.20    0.05 
  26   8  -1    0.18    0.05 
 -26   8   1    0.19    0.04 
  26   8  -1    0.18    0.05 
 -24  -8   1    0.12    0.06 
 -24  -8   1    0.06    0.05 
 -24  -8   1    0.04    0.05 
  24   8  -1    0.04    0.04 
 -24   8   1    0.03    0.04 
 -24   8   1    0.02    0.03 
 -24   8   1    0.02    0.04 
  24   8  -1    0.02    0.05 
  24   8  -1    0.04    0.03 
 -22  -8   1    0.75    0.11 
 -22  -8   1    0.73    0.11 
 -22  -8   1    0.74    0.11 
  22  -8  -1    0.58    0.09 
  22   8  -1    0.63    0.07 
  22   8  -1    0.63    0.10 
 -22   8   1    0.54    0.08 
 -22   8   1    0.61    0.07 
 -22   8   1    0.65    0.07 
  20  -8  -1    1.73    0.15 
 -20  -8   1    1.59    0.16 
 -20  -8   1    1.77    0.17 
 -20  -8   1    1.44    0.17 
  20   8  -1    1.51    0.12 
  20   8  -1    1.54    0.14 
  20   8  -1    1.22    0.18 
 -20   8   1    1.54    0.13 
 -20   8   1    1.28    0.16 
 -20   8   1    1.51    0.13 
  20   8  -1    1.49    0.16 
 -20   8   1    1.60    0.12 
 -18  -8   1    1.03    0.14 
 -18  -8   1    0.99    0.13 
 -18  -8   1    0.85    0.13 
  18  -8  -1    1.07    0.13 
  18   8  -1    1.12    0.12 
 -18   8   1    1.03    0.11 
 -18   8   1    0.98    0.14 
  18   8  -1    0.95    0.15 
 -18   8   1    1.01    0.09 
  18   8  -1    0.96    0.10 
 -16  -8   1    1.14    0.15 
  16  -8  -1    1.01    0.14 
 -16  -8   1    1.30    0.16 
  16  -8  -1    0.97    0.13 
 -16  -8   1    1.11    0.14 
 -16   8   1    1.23    0.15 
  16   8  -1    1.26    0.17 
 -16   8   1    1.17    0.11 
  16   8  -1    1.16    0.12 
 -16   8   1    1.04    0.10 
  16   8  -1    1.02    0.10 
 -14  -8   1    2.18    0.21 
  14  -8  -1    2.37    0.21 
 -14  -8   1    2.37    0.20 
  14  -8  -1    2.14    0.21 
 -14  -8   1    2.19    0.21 
  14   8  -1    2.55    0.19 
  14   8  -1    2.65    0.25 
 -14   8   1    2.46    0.18 
 -14   8   1    2.63    0.22 
 -12  -8   1    2.19    0.28 
 -12  -8   1    2.12    0.28 
  12  -8  -1    2.12    0.26 
  12   8  -1    2.52    0.21 
 -12   8   1    2.71    0.21 
 -12   8   1    2.38    0.22 
 -12   8   1    2.48    0.18 
  12   8  -1    2.58    0.19 
  12   8  -1    2.86    0.25 
  12   8  -1    2.47    0.24 
 -10  -8   1    0.28    0.13 
 -10  -8   1    0.37    0.14 
  10  -8  -1    0.31    0.12 
  10   8  -1    0.42    0.07 
 -10   8   1    0.35    0.08 
  10   8  -1    0.36    0.07 
  10   8  -1    0.31    0.10 
 -10   8   1    0.36    0.08 
  10   8  -1    0.44    0.10 
  -8  -8   1    0.76    0.15 
   8  -8  -1    0.53    0.15 
  -8  -8   1    0.54    0.15 
   8   8  -1    0.46    0.07 
   8   8  -1    0.59    0.10 
   8   8  -1    0.56    0.08 
   8   8  -1    0.55    0.11 
  -8   8   1    0.53    0.08 
  -8   8   1    0.58    0.08 
   6  -8  -1    1.63    0.20 
  -6  -8   1    1.39    0.21 
  -6   8   1    1.34    0.13 
  -6   8   1    1.52    0.13 
   6   8  -1    1.60    0.16 
   6   8  -1    1.59    0.14 
  -4  -8   1    2.32    0.26 
   4  -8  -1    1.94    0.22 
  -4   8   1    2.04    0.16 
   4   8  -1    2.11    0.17 
   4   8  -1    2.13    0.19 
   2  -8  -1    5.67    0.43 
  -2  -8   1    5.36    0.47 
  -2   8   1    5.32    0.35 
   2   8  -1    5.47    0.38 
   2   8  -1    5.58    0.37 
   0  -8  -1   12.49    0.88 
   0  -8  -1   13.00    0.84 
   0  -8   1   12.86    0.90 
   0   8  -1   13.72    0.81 
   0   8   1   11.69    0.77 
   0   8  -1   12.45    0.79 
  -2  -8  -1   10.69    0.77 
  -2  -8  -1   10.35    0.71 
   2  -8   1   11.18    0.73 
  -2   8  -1   11.28    0.68 
   2   8   1    9.88    0.64 
  -2   8  -1   10.26    0.67 
  -4  -8  -1    2.27    0.28 
  -4  -8  -1    2.63    0.29 
   4  -8   1    2.43    0.25 
  -4   8  -1    2.38    0.18 
  -4   8  -1    2.76    0.22 
  -4   8  -1    2.66    0.21 
   4   8   1    2.67    0.18 
   6  -8   1    1.73    0.21 
  -6  -8  -1    1.69    0.22 
  -6  -8  -1    2.00    0.24 
  -6   8  -1    2.02    0.17 
   6   8   1    2.01    0.20 
  -6   8  -1    1.88    0.17 
   6   8   1    1.95    0.15 
   6   8   1    1.73    0.20 
  -6   8  -1    1.86    0.14 
   8  -8   1    1.67    0.22 
  -8  -8  -1    2.13    0.26 
  -8  -8  -1    2.36    0.27 
   8   8   1    2.31    0.17 
  -8   8  -1    2.45    0.20 
  -8   8  -1    2.31    0.16 
   8   8   1    2.42    0.23 
  -8   8  -1    2.04    0.20 
   8   8   1    2.26    0.19 
 -10  -8  -1    0.72    0.15 
 -10  -8  -1    0.76    0.16 
 -10   8  -1    0.58    0.07 
  10   8   1    0.58    0.10 
 -10   8  -1    0.40    0.10 
  10   8   1    0.56    0.12 
 -10   8  -1    0.57    0.10 
 -10   8  -1    0.43    0.13 
  10   8   1    0.57    0.08 
  12  -8   1    1.32    0.16 
 -12  -8  -1    1.42    0.17 
  12  -8   1    1.44    0.14 
 -12  -8  -1    1.43    0.16 
  12  -8   1    1.30    0.16 
 -12  -8  -1    1.19    0.14 
  12   8   1    1.56    0.15 
  12   8   1    1.88    0.18 
 -12   8  -1    1.55    0.12 
 -12   8  -1    1.70    0.13 
 -12   8  -1    1.73    0.17 
  14  -8   1    5.64    0.42 
  14  -8   1    5.78    0.41 
 -14  -8  -1    5.61    0.46 
  14  -8   1    5.89    0.42 
 -14  -8  -1    5.71    0.42 
 -14  -8  -1    5.77    0.41 
 -14  -8  -1    6.34    0.43 
 -14   8  -1    6.42    0.39 
  14   8   1    6.89    0.45 
 -14   8  -1    6.20    0.38 
 -14   8  -1    5.89    0.39 
  14   8   1    6.08    0.39 
 -14   8  -1    6.19    0.43 
 -16  -8  -1    0.85    0.16 
  16  -8   1    0.79    0.12 
 -16  -8  -1    0.84    0.12 
 -16  -8  -1    0.65    0.11 
 -16  -8  -1    0.66    0.11 
  16  -8   1    0.67    0.10 
 -16   8  -1    0.76    0.09 
 -16   8  -1    0.71    0.09 
  16   8   1    0.75    0.09 
 -16   8  -1    0.76    0.08 
  16   8   1    0.79    0.13 
 -18  -8  -1    0.74    0.12 
  18  -8   1    0.57    0.10 
 -18  -8  -1    0.53    0.10 
 -18  -8  -1    0.73    0.12 
  18  -8   1    0.66    0.10 
 -18  -8  -1    0.68    0.14 
  18   8   1    0.72    0.13 
 -18   8  -1    0.66    0.08 
 -18   8  -1    0.66    0.10 
 -18   8  -1    0.68    0.07 
 -18   8  -1    0.58    0.08 
  18   8   1    0.68    0.08 
  18   8   1    0.79    0.09 
 -20  -8  -1    1.02    0.13 
 -20  -8  -1    0.93    0.13 
  20  -8   1    0.76    0.10 
 -20  -8  -1    0.77    0.14 
 -20  -8  -1    0.90    0.12 
 -20   8  -1    0.98    0.10 
 -20   8  -1    0.89    0.08 
 -20   8  -1    0.93    0.10 
  20   8   1    0.95    0.09 
  20   8   1    0.89    0.10 
 -22  -8  -1    0.38    0.09 
  22  -8   1    0.46    0.07 
 -22  -8  -1    0.34    0.07 
 -22  -8  -1    0.45    0.08 
 -22  -8  -1    0.43    0.08 
 -22   8  -1    0.23    0.07 
  22   8   1    0.33    0.05 
 -22   8  -1    0.31    0.05 
  22   8   1    0.29    0.06 
 -24  -8  -1    0.30    0.06 
  24  -8   1    0.30    0.06 
 -24  -8  -1    0.31    0.06 
  24   8   1    0.22    0.04 
 -24   8  -1    0.24    0.05 
 -24   8  -1    0.16    0.05 
 -26  -8  -1    0.15    0.04 
 -26  -8  -1    0.16    0.04 
  26   8   1    0.09    0.03 
 -26   8  -1    0.11    0.03 
 -25  -9   1    0.24    0.05 
 -25  -9   1    0.38    0.06 
  25   9  -1    0.30    0.05 
  25   9  -1    0.31    0.06 
 -25   9   1    0.26    0.04 
 -25   9   1    0.30    0.05 
 -23  -9   1    4.18    0.27 
 -23  -9   1    3.74    0.27 
  23  -9  -1    3.54    0.26 
 -23  -9   1    4.02    0.26 
 -23   9   1    3.77    0.25 
 -23   9   1    4.07    0.25 
  23   9  -1    3.96    0.24 
 -23   9   1    3.88    0.24 
  23   9  -1    3.66    0.28 
  23   9  -1    3.86    0.27 
  21  -9  -1    4.11    0.29 
 -21  -9   1    4.52    0.30 
 -21  -9   1    4.40    0.31 
 -21  -9   1    4.63    0.30 
 -21   9   1    4.42    0.27 
 -21   9   1    4.06    0.27 
  21   9  -1    4.54    0.27 
 -21   9   1    3.75    0.28 
 -19  -9   1    3.08    0.22 
 -19  -9   1    3.14    0.24 
 -19  -9   1    3.23    0.23 
  19  -9  -1    2.98    0.22 
 -19   9   1    2.67    0.18 
 -19   9   1    2.51    0.19 
 -19   9   1    2.17    0.22 
 -19   9   1    2.45    0.19 
  19   9  -1    2.69    0.19 
  17  -9  -1    1.80    0.17 
 -17  -9   1    1.79    0.17 
 -17  -9   1    1.78    0.18 
  17  -9  -1    1.71    0.16 
 -17  -9   1    1.81    0.19 
 -17   9   1    1.71    0.13 
  17   9  -1    1.68    0.20 
  17   9  -1    1.84    0.15 
 -17   9   1    1.70    0.18 
 -17   9   1    1.84    0.14 
  17   9  -1    1.81    0.14 
  15  -9  -1    0.61    0.10 
 -15  -9   1    0.67    0.11 
 -15  -9   1    0.90    0.13 
 -15  -9   1    0.72    0.11 
  15  -9  -1    0.58    0.10 
 -15   9   1    0.68    0.10 
  15   9  -1    0.85    0.10 
  15   9  -1    0.70    0.08 
  15   9  -1    0.77    0.15 
 -15   9   1    0.78    0.12 
 -15   9   1    0.83    0.09 
  13  -9  -1    0.62    0.11 
 -13  -9   1    0.94    0.12 
 -13  -9   1    0.72    0.11 
 -13  -9   1    0.65    0.11 
  13  -9  -1    0.88    0.14 
 -13   9   1    0.97    0.13 
  13   9  -1    0.87    0.15 
 -13   9   1    0.74    0.09 
  13   9  -1    0.76    0.10 
  11  -9  -1    3.25    0.26 
 -11  -9   1    3.08    0.24 
 -11  -9   1    2.74    0.25 
  11  -9  -1    3.02    0.26 
 -11  -9   1    3.01    0.25 
 -11  -9   1    3.09    0.25 
  11   9  -1    3.74    0.30 
  11   9  -1    3.18    0.23 
 -11   9   1    3.06    0.22 
 -11   9   1    3.44    0.25 
   9  -9  -1    7.46    0.50 
  -9  -9   1    7.35    0.49 
  -9  -9   1    7.39    0.48 
  -9  -9   1    6.65    0.49 
   9  -9  -1    7.54    0.48 
   9  -9  -1    7.15    0.50 
  -9  -9   1    7.26    0.49 
   9   9  -1    7.43    0.47 
   9   9  -1    8.17    0.54 
  -9   9   1    7.96    0.50 
  -7  -9   1    7.96    0.55 
  -7  -9   1    8.26    0.67 
   7  -9  -1    7.92    0.62 
  -7  -9   1    9.70    0.58 
   7  -9  -1    8.44    0.57 
  -7  -9   1    9.34    0.57 
   7  -9  -1    7.74    0.54 
   7   9  -1    9.07    0.58 
  -7   9   1    8.83    0.55 
   7   9  -1    7.50    0.52 
   7   9  -1    7.88    0.60 
  -5  -9   1   10.18    0.73 
   5  -9  -1    9.39    0.67 
   5   9  -1    9.75    0.62 
   5   9  -1    8.72    0.59 
  -5   9   1    9.23    0.58 
  -5   9   1    7.80    0.57 
   3  -9  -1   10.80    0.74 
  -3  -9   1   10.29    0.78 
   3   9  -1   11.54    0.69 
  -3   9   1   10.61    0.65 
  -3   9   1    9.41    0.64 
   3   9  -1    9.49    0.66 
   1   9  -1    1.16    0.13 
   1   9  -1    1.11    0.12 
  -1   9   1    1.01    0.10 
   1   9  -1    1.02    0.10 
  -1  -9  -1    0.70    0.23 
  -1  -9  -1    0.62    0.16 
   1   9   1    0.79    0.08 
  -1   9  -1    0.85    0.10 
  -1   9  -1    0.94    0.09 
  -1   9  -1    0.98    0.12 
  -3  -9  -1    1.82    0.25 
  -3   9  -1    2.10    0.18 
  -3   9  -1    2.24    0.19 
  -3   9  -1    2.06    0.15 
   3   9   1    1.89    0.15 
   5  -9   1    5.14    0.44 
  -5  -9  -1    5.68    0.49 
   5   9   1    5.65    0.37 
   5   9   1    5.26    0.36 
  -5   9  -1    5.60    0.35 
  -5   9  -1    5.29    0.41 
  -5   9  -1    5.91    0.39 
   5   9   1    4.77    0.41 
  -7  -9  -1    9.87    0.65 
   7  -9   1   10.43    0.65 
  -7  -9  -1    9.75    0.65 
   7  -9   1   10.26    0.67 
   7  -9   1   10.83    0.67 
  -7  -9  -1    9.34    0.64 
   7   9   1   10.21    0.66 
  -7   9  -1   10.67    0.63 
  -7   9  -1   10.94    0.68 
   9  -9   1    8.12    0.56 
  -9  -9  -1    7.74    0.55 
   9  -9   1    8.08    0.53 
  -9  -9  -1    7.52    0.53 
  -9  -9  -1    7.58    0.54 
   9  -9   1    8.09    0.56 
  -9  -9  -1    7.70    0.58 
   9   9   1    9.35    0.57 
  -9   9  -1    9.11    0.52 
  -9   9  -1    9.41    0.57 
  11  -9   1    6.57    0.45 
 -11  -9  -1    6.76    0.46 
 -11  -9  -1    6.72    0.48 
  11  -9   1    6.85    0.48 
 -11  -9  -1    6.69    0.51 
 -11  -9  -1    6.75    0.47 
  11  -9   1    7.03    0.48 
 -11   9  -1    7.36    0.45 
 -11   9  -1    6.89    0.43 
  11   9   1    7.68    0.50 
 -11   9  -1    7.77    0.49 
 -13  -9  -1    2.19    0.20 
  13  -9   1    2.36    0.21 
 -13  -9  -1    2.08    0.25 
  13  -9   1    2.32    0.21 
 -13  -9  -1    2.13    0.20 
 -13  -9  -1    2.26    0.22 
  13   9   1    2.42    0.23 
 -13   9  -1    2.33    0.16 
  13   9   1    2.27    0.18 
 -13   9  -1    2.41    0.18 
 -13   9  -1    2.44    0.22 
 -13   9  -1    2.26    0.18 
 -15  -9  -1    1.59    0.18 
  15  -9   1    1.58    0.17 
 -15  -9  -1    1.67    0.17 
  15  -9   1    1.62    0.17 
 -15  -9  -1    1.78    0.23 
 -15  -9  -1    1.98    0.20 
 -15   9  -1    1.92    0.15 
 -15   9  -1    1.79    0.18 
 -15   9  -1    2.10    0.14 
  15   9   1    1.95    0.15 
 -15   9  -1    1.96    0.15 
 -17  -9  -1    0.57    0.13 
 -17  -9  -1    0.64    0.10 
 -17  -9  -1    0.56    0.11 
  17  -9   1    0.59    0.10 
 -17  -9  -1    0.54    0.11 
 -17   9  -1    0.61    0.07 
  17   9   1    0.64    0.07 
  17   9   1    0.56    0.09 
 -17   9  -1    0.53    0.07 
 -17   9  -1    0.54    0.08 
 -19  -9  -1    0.44    0.09 
  19  -9   1    0.39    0.08 
 -19  -9  -1    0.37    0.08 
 -19   9  -1    0.37    0.06 
 -19   9  -1    0.37    0.06 
  19   9   1    0.36    0.05 
  19   9   1    0.49    0.08 
 -19   9  -1    0.30    0.05 
 -21  -9  -1    2.67    0.20 
 -21  -9  -1    2.78    0.20 
  21  -9   1    2.29    0.19 
 -21   9  -1    2.60    0.18 
  21   9   1    2.54    0.18 
  21   9   1    2.65    0.17 
 -23  -9  -1    2.41    0.17 
 -23  -9  -1    2.23    0.17 
  23   9   1    2.27    0.15 
 -23   9  -1    1.99    0.15 
 -23   9  -1    2.32    0.15 
  22 -10  -1    0.33    0.06 
 -22 -10   1    0.31    0.06 
 -22 -10   1    0.42    0.06 
  22  10  -1    0.41    0.07 
 -22  10   1    0.54    0.05 
  22  10  -1    0.54    0.05 
 -22  10   1    0.55    0.07 
 -22  10   1    0.47    0.06 
  20 -10  -1    0.23    0.06 
 -20 -10   1    0.22    0.06 
 -20 -10   1    0.27    0.06 
 -20 -10   1    0.21    0.06 
 -20  10   1    0.29    0.05 
  20  10  -1    0.20    0.06 
 -20  10   1    0.37    0.04 
  20  10  -1    0.33    0.04 
 -20  10   1    0.26    0.05 
  20  10  -1    0.20    0.05 
 -18 -10   1    0.14    0.06 
  18 -10  -1    0.12    0.06 
 -18 -10   1    0.17    0.06 
 -18 -10   1    0.13    0.06 
  18 -10  -1    0.06    0.05 
 -18  10   1    0.01    0.04 
 -18  10   1    0.05    0.04 
  18  10  -1    0.02    0.05 
 -18  10   1    0.08    0.03 
  18  10  -1    0.03    0.04 
  18  10  -1    0.04    0.03 
  16 -10  -1    0.45    0.08 
 -16 -10   1    0.61    0.10 
 -16 -10   1    0.47    0.09 
 -16 -10   1    0.46    0.09 
  16 -10  -1    0.40    0.08 
 -16  10   1    0.42    0.06 
 -16  10   1    0.32    0.09 
 -16  10   1    0.41    0.05 
  16  10  -1    0.43    0.06 
  16  10  -1    0.36    0.07 
  14 -10  -1    5.36    0.37 
 -14 -10   1    5.26    0.36 
 -14 -10   1    5.40    0.37 
  14 -10  -1    5.16    0.36 
 -14 -10   1    5.45    0.37 
  14  10  -1    5.04    0.33 
 -14  10   1    5.24    0.38 
  14  10  -1    4.92    0.41 
 -14  10   1    5.03    0.34 
 -12 -10   1    3.42    0.27 
 -12 -10   1    3.51    0.26 
  12 -10  -1    3.33    0.27 
 -12 -10   1    3.44    0.26 
  12 -10  -1    3.44    0.27 
  12  10  -1    3.41    0.31 
 -12  10   1    3.48    0.23 
 -12  10   1    3.44    0.27 
 -10 -10   1    0.07    0.06 
 -10 -10   1    0.13    0.06 
  10 -10  -1    0.13    0.07 
 -10 -10   1    0.13    0.06 
  10 -10  -1    0.07    0.07 
 -10  10   1    0.13    0.06 
  10  10  -1    0.11    0.08 
 -10  10   1    0.13    0.04 
   8 -10  -1    0.70    0.12 
  -8 -10   1    0.75    0.11 
   8 -10  -1    0.56    0.10 
  -8 -10   1    0.54    0.09 
   8 -10  -1    0.67    0.09 
  -8 -10   1    0.63    0.09 
  -8  10   1    0.49    0.09 
   8  10  -1    0.47    0.12 
   6 -10  -1    1.77    0.19 
   6 -10  -1    1.87    0.20 
  -6 -10   1    2.09    0.17 
  -6 -10   1    1.85    0.18 
   6 -10  -1    2.03    0.17 
  -6 -10   1    2.11    0.18 
  -6  10   1    1.98    0.18 
   6  10  -1    2.08    0.16 
   6  10  -1    1.99    0.21 
  -4 -10   1    0.51    0.09 
   4 -10  -1    0.58    0.11 
   4 -10  -1    0.49    0.09 
  -4 -10   1    0.64    0.10 
  -4 -10   1    0.67    0.09 
   4  10  -1    0.53    0.08 
  -4  10   1    0.57    0.09 
   4  10  -1    0.52    0.11 
   2 -10  -1    7.35    0.47 
  -2 -10   1    7.19    0.47 
   2 -10  -1    6.60    0.48 
   2 -10  -1    7.14    0.46 
  -2 -10   1    7.15    0.47 
  -2 -10   1    6.96    0.52 
  -2 -10   1    7.67    0.46 
   2  10  -1    7.43    0.50 
  -2  10   1    7.13    0.47 
   2  10  -1    6.63    0.45 
   0 -10  -1   15.35    0.95 
   0 -10   1   14.77    0.98 
   0 -10   1   16.44    0.96 
   0 -10   1   15.39    0.95 
   0 -10  -1   14.65    0.95 
   0  10  -1   16.52    0.99 
   0  10   1   15.90    0.96 
   0  10  -1   15.13    0.94 
   2 -10   1    3.32    0.25 
  -2 -10  -1    3.07    0.24 
  -2 -10  -1    3.19    0.25 
   2 -10   1    3.22    0.29 
   2 -10   1    3.29    0.25 
  -2  10  -1    3.69    0.24 
  -2  10  -1    3.73    0.28 
   2  10   1    3.57    0.26 
  -4 -10  -1    1.99    0.19 
   4 -10   1    2.13    0.21 
   4 -10   1    2.28    0.19 
  -4 -10  -1    2.20    0.18 
   4 -10   1    2.12    0.19 
   4 -10   1    2.41    0.23 
  -4  10  -1    2.50    0.21 
   4  10   1    2.44    0.20 
  -4  10  -1    2.20    0.17 
  -6 -10  -1    7.45    0.49 
   6 -10   1    7.43    0.49 
  -6 -10  -1    7.06    0.48 
  -6 -10  -1    7.03    0.49 
   6 -10   1    7.95    0.52 
   6 -10   1    7.73    0.52 
  -6  10  -1    7.66    0.52 
  -6  10  -1    7.76    0.48 
   6  10   1    7.78    0.51 
  -8 -10  -1    3.50    0.26 
   8 -10   1    3.65    0.26 
  -8 -10  -1    3.32    0.27 
   8 -10   1    3.59    0.29 
   8 -10   1    3.73    0.29 
  -8 -10  -1    3.31    0.27 
  -8  10  -1    3.85    0.25 
  -8  10  -1    3.86    0.29 
   8  10   1    3.83    0.30 
  10 -10   1    0.00    0.04 
  10 -10   1    0.09    0.06 
 -10 -10  -1    0.07    0.06 
  10 -10   1   -0.02    0.06 
 -10 -10  -1    0.04    0.05 
 -10  10  -1    0.12    0.04 
  10  10   1    0.09    0.07 
 -10  10  -1    0.09    0.04 
 -10  10  -1    0.07    0.06 
  12 -10   1    0.89    0.13 
  12 -10   1    0.78    0.12 
 -12 -10  -1    0.95    0.12 
 -12 -10  -1    0.93    0.11 
 -12  10  -1    0.66    0.12 
  12  10   1    0.61    0.09 
 -12  10  -1    0.70    0.07 
  12  10   1    0.67    0.13 
 -12  10  -1    0.69    0.09 
 -14 -10  -1    0.33    0.08 
  14 -10   1    0.23    0.07 
  14 -10   1    0.37    0.08 
 -14 -10  -1    0.38    0.08 
  14  10   1    0.39    0.10 
 -14  10  -1    0.41    0.06 
  14  10   1    0.44    0.07 
 -14  10  -1    0.43    0.05 
 -14  10  -1    0.37    0.06 
 -14  10  -1    0.38    0.09 
 -16 -10  -1    0.75    0.11 
  16 -10   1    0.60    0.09 
 -16 -10  -1    0.74    0.11 
  16 -10   1    0.70    0.11 
  16  10   1    0.88    0.11 
 -16  10  -1    0.94    0.08 
 -16  10  -1    0.82    0.09 
  16  10   1    0.85    0.09 
 -16  10  -1    0.75    0.09 
 -18 -10  -1    1.89    0.17 
 -18 -10  -1    2.02    0.17 
  18 -10   1    1.88    0.16 
 -18  10  -1    1.99    0.14 
 -18  10  -1    1.80    0.14 
 -18  10  -1    1.90    0.13 
  18  10   1    1.87    0.13 
  18  10   1    1.85    0.15 
 -20 -10  -1    1.64    0.14 
 -20 -10  -1    1.61    0.13 
  20 -10   1    1.47    0.13 
 -20  10  -1    1.46    0.11 
  20  10   1    1.63    0.11 
 -20  10  -1    1.76    0.12 
 -22 -10  -1    1.66    0.13 
 -22 -10  -1    1.50    0.13 
  22  10   1    1.70    0.11 
 -22  10  -1    1.78    0.12 
 -19 -11   1    1.11    0.10 
 -19 -11   1    1.05    0.10 
  19 -11  -1    0.88    0.10 
  19 -11  -1    1.07    0.10 
 -19  11   1    1.08    0.08 
  19  11  -1    1.08    0.08 
  19  11  -1    0.98    0.10 
 -19  11   1    0.99    0.08 
  17 -11  -1    0.98    0.11 
 -17 -11   1    1.16    0.12 
 -17 -11   1    1.11    0.12 
  17 -11  -1    1.13    0.12 
  17  11  -1    1.26    0.11 
 -17  11   1    1.22    0.10 
  17  11  -1    1.35    0.10 
 -17  11   1    1.26    0.09 
 -17  11   1    1.16    0.10 
  17  11  -1    1.28    0.12 
  15 -11  -1    1.25    0.13 
 -15 -11   1    1.34    0.13 
  15 -11  -1    1.26    0.13 
 -15 -11   1    1.19    0.13 
  15  11  -1    1.35    0.11 
  15  11  -1    1.21    0.12 
 -15  11   1    1.26    0.11 
 -15  11   1    1.30    0.10 
 -13 -11   1    0.00    0.04 
  13 -11  -1    0.00    0.05 
 -13 -11   1    0.02    0.05 
  13 -11  -1   -0.03    0.05 
 -13  11   1    0.03    0.03 
 -13  11   1    0.04    0.04 
  13  11  -1    0.02    0.03 
  13  11  -1    0.03    0.04 
 -13  11   1    0.01    0.06 
  13  11  -1   -0.01    0.09 
  11 -11  -1    1.41    0.15 
 -11 -11   1    1.39    0.14 
 -11 -11   1    1.49    0.13 
  11 -11  -1    1.47    0.15 
 -11  11   1    1.11    0.13 
 -11  11   1    1.16    0.11 
  11  11  -1    1.11    0.11 
  11  11  -1    1.15    0.16 
  11  11  -1    1.14    0.12 
  -9 -11   1    1.18    0.14 
   9 -11  -1    1.11    0.15 
  -9 -11   1    1.11    0.12 
   9 -11  -1    1.12    0.14 
  -9 -11   1    0.99    0.13 
  -9  11   1    1.23    0.13 
   9  11  -1    1.18    0.16 
  -9  11   1    1.26    0.11 
   9  11  -1    1.35    0.12 
  -7 -11   1    1.83    0.17 
   7 -11  -1    1.88    0.20 
  -7 -11   1    1.81    0.18 
  -7 -11   1    1.85    0.18 
   7 -11  -1    1.80    0.19 
   7  11  -1    2.27    0.22 
  -7  11   1    2.20    0.18 
  -7  11   1    2.19    0.16 
   7  11  -1    2.34    0.17 
  -5 -11   1    7.00    0.44 
   5 -11  -1    6.81    0.46 
  -5 -11   1    7.08    0.43 
  -5 -11   1    6.97    0.44 
   5 -11  -1    7.12    0.44 
  -5  11   1    5.90    0.44 
   5  11  -1    6.47    0.43 
   5  11  -1    6.06    0.47 
  -3 -11   1   13.60    0.80 
   3 -11  -1   12.92    0.81 
  -3 -11   1   13.45    0.80 
   3 -11  -1   13.28    0.79 
   3  11  -1   12.37    0.78 
  -3  11   1   11.88    0.80 
   3  11  -1   12.35    0.83 
  -1 -11   1    1.56    0.15 
  -1 -11   1    1.49    0.15 
   1 -11  -1    1.53    0.15 
   1 -11  -1    1.27    0.16 
  -1 -11   1    1.41    0.17 
   1  11  -1    1.76    0.18 
  -1  11   1    1.62    0.16 
   1  11  -1    1.74    0.14 
   1 -11   1    1.59    0.15 
   1 -11   1    1.56    0.15 
  -1 -11  -1    1.55    0.15 
  -1 -11  -1    1.51    0.15 
   1 -11   1    1.42    0.18 
   1  11   1    1.67    0.16 
  -1  11  -1    1.70    0.14 
  -1  11  -1    1.77    0.18 
   3 -11   1    0.50    0.08 
  -3 -11  -1    0.35    0.07 
   3 -11   1    0.38    0.09 
  -3  11  -1    0.42    0.09 
  -3  11  -1    0.33    0.06 
   3  11   1    0.31    0.08 
   5 -11   1    0.01    0.06 
  -5 -11  -1    0.04    0.04 
   5 -11   1   -0.01    0.06 
   5 -11   1    0.03    0.05 
  -5 -11  -1    0.01    0.05 
  -5  11  -1    0.02    0.04 
   5  11   1    0.01    0.05 
  -5  11  -1    0.02    0.05 
   7 -11   1    1.56    0.17 
  -7 -11  -1    1.48    0.15 
   7 -11   1    1.59    0.18 
  -7 -11  -1    1.61    0.15 
   7 -11   1    1.79    0.15 
  -7  11  -1    1.70    0.12 
  -7  11  -1    1.71    0.17 
   7  11   1    1.68    0.17 
  -7  11  -1    1.81    0.14 
  -9 -11  -1    3.41    0.24 
   9 -11   1    3.62    0.27 
   9 -11   1    3.63    0.27 
  -9  11  -1    3.22    0.23 
   9  11   1    3.17    0.27 
  -9  11  -1    3.36    0.21 
  -9  11  -1    3.01    0.26 
   9  11   1    2.96    0.26 
 -11 -11  -1    2.85    0.20 
  11 -11   1    2.90    0.22 
  11 -11   1    2.88    0.22 
 -11  11  -1    2.39    0.18 
 -11  11  -1    2.58    0.17 
  11  11   1    2.25    0.22 
  11  11   1    2.29    0.18 
 -11  11  -1    2.65    0.18 
 -11  11  -1    2.11    0.21 
  13 -11   1    0.79    0.11 
  13 -11   1    0.73    0.10 
 -13 -11  -1    0.79    0.10 
 -13  11  -1    0.74    0.07 
 -13  11  -1    0.65    0.08 
  13  11   1    0.66    0.08 
 -13  11  -1    0.63    0.08 
 -15 -11  -1    0.85    0.11 
 -15 -11  -1    0.96    0.12 
  15 -11   1    1.00    0.11 
  15 -11   1    0.89    0.11 
 -15  11  -1    1.13    0.09 
  15  11   1    1.14    0.10 
 -15  11  -1    1.03    0.09 
  15  11   1    1.11    0.10 
 -15  11  -1    0.94    0.09 
  17 -11   1    0.53    0.08 
 -17 -11  -1    0.43    0.07 
 -17  11  -1    0.60    0.07 
 -17  11  -1    0.57    0.05 
  17  11   1    0.55    0.06 
  19 -11   1    0.08    0.04 
 -19 -11  -1    0.05    0.04 
 -19  11  -1    0.08    0.03 
  19  11   1    0.06    0.04 
  19  11   1    0.11    0.02 
 -16 -12   1    4.00    0.26 
 -16 -12   1    4.20    0.26 
  16 -12  -1    4.24    0.27 
  16 -12  -1    4.05    0.26 
 -16  12   1    3.55    0.25 
 -16  12   1    3.93    0.24 
  14 -12  -1    2.18    0.17 
 -14 -12   1    1.99    0.16 
 -14 -12   1    2.14    0.16 
  14 -12  -1    2.14    0.16 
 -14  12   1    1.99    0.14 
  12 -12  -1    2.02    0.17 
  12 -12  -1    1.97    0.17 
 -12 -12   1    2.06    0.17 
 -12 -12   1    2.17    0.16 
 -12  12   1    1.95    0.14 
  12  12  -1    1.86    0.15 
 -12  12   1    2.00    0.13 
  10 -12  -1    2.47    0.20 
 -10 -12   1    2.52    0.19 
 -10 -12   1    2.44    0.20 
  10 -12  -1    2.43    0.20 
 -10  12   1    2.52    0.17 
  10  12  -1    2.56    0.19 
   8 -12  -1    1.09    0.13 
  -8 -12   1    1.18    0.12 
  -8 -12   1    1.03    0.12 
   8 -12  -1    1.11    0.12 
  -8  12   1    1.00    0.09 
   8  12  -1    0.98    0.10 
  -6 -12   1    0.94    0.11 
  -6 -12   1    0.92    0.11 
   6 -12  -1    0.91    0.13 
   6  12  -1    0.71    0.09 
  -6  12   1    0.69    0.08 
   4 -12  -1    3.25    0.24 
  -4 -12   1    3.40    0.23 
  -4 -12   1    3.33    0.23 
   4  12  -1    2.78    0.21 
   4  12  -1    2.63    0.24 
  -2 -12   1    0.43    0.07 
   2 -12  -1    0.36    0.07 
   2 -12  -1    0.37    0.08 
  -2 -12   1    0.43    0.07 
   2  12  -1    0.20    0.08 
   2  12  -1    0.18    0.05 
  -2  12   1    0.17    0.07 
   0 -12  -1    0.59    0.09 
   0 -12   1    0.72    0.10 
   0 -12   1    0.54    0.10 
   0  12   1    0.78    0.12 
   0  12  -1    0.83    0.09 
   0  12  -1    0.80    0.11 
   2 -12   1    4.35    0.28 
   2 -12   1    4.03    0.30 
  -2  12  -1    3.92    0.26 
  -2  12  -1    3.69    0.30 
   4 -12   1    2.68    0.20 
  -4 -12  -1    2.59    0.20 
   4 -12   1    2.76    0.23 
  -4  12  -1    2.73    0.18 
  -4  12  -1    2.90    0.19 
  -6 -12  -1    2.35    0.18 
   6 -12   1    2.65    0.21 
   6 -12   1    2.48    0.18 
   6 -12   1    2.31    0.20 
  -6  12  -1    2.28    0.16 
  -6  12  -1    2.09    0.17 
   8 -12   1    1.07    0.12 
   8 -12   1    0.94    0.11 
  -8  12  -1    0.80    0.07 
  -8  12  -1    0.78    0.08 
   8  12   1    0.75    0.09 
  10 -12   1    0.44    0.08 
  10 -12   1    0.44    0.08 
 -10  12  -1    0.43    0.06 
 -10  12  -1    0.41    0.05 
 -10  12  -1    0.29    0.05 
  10  12   1    0.30    0.06 
 -12 -12  -1    0.01    0.04 
  12 -12   1   -0.01    0.04 
  12 -12   1    0.05    0.05 
 -12  12  -1    0.02    0.03 
 -12  12  -1    0.03    0.05 
 -12  12  -1    0.00    0.02 
  14 -12   1    1.68    0.13 
  14 -12   1    1.59    0.12 
 -14 -12  -1    1.60    0.12 
 -14  12  -1    1.53    0.10 
 -14  12  -1    1.30    0.11 
  14  12   1    1.40    0.11 
 -11 -13   1    0.12    0.04 
  11 -13  -1    0.10    0.04 
  11 -13  -1    0.06    0.06 
  11  13  -1    0.08    0.02 
 -11  13   1    0.13    0.03 
  -9 -13   1    0.12    0.04 
   9 -13  -1    0.12    0.05 
   9  13  -1    0.13    0.03 
  -7 -13   1    0.37    0.06 
  -7 -13   1    0.26    0.05 
   7 -13  -1    0.33    0.06 
   7  13  -1    0.29    0.04 
   5 -13  -1    0.82    0.10 
  -5 -13   1    0.91    0.09 
   5  13  -1    0.74    0.10 
   5  13  -1    0.79    0.07 
   3 -13  -1    0.05    0.05 
  -3 -13   1    0.08    0.04 
   3  13  -1    0.04    0.03 
   3  13  -1    0.06    0.02 
  -1 -13   1    0.75    0.09 
   1  13  -1    0.62    0.07 
   1  13  -1    0.74    0.06 
   1 -13   1    0.43    0.08 
   1 -13   1    0.45    0.07 
  -1  13  -1    0.48    0.05 
  -1  13  -1    0.46    0.06 
   3 -13   1    0.11    0.04 
   3 -13   1    0.12    0.06 
  -3  13  -1    0.19    0.03 
  -3  13  -1    0.15    0.04 
   5 -13   1    0.05    0.05 
  -5  13  -1    0.06    0.02 
   7 -13   1    0.07    0.05 
   7 -13   1    0.07    0.05 
  -7  13  -1    0.04    0.02 
  -7  13  -1    0.06    0.03 
   9 -13   1    0.04    0.04 
   9 -13   1    0.09    0.04 
  -9  13  -1    0.00    0.03 
  -9  13  -1    0.04    0.02 
 -34   0   2    0.02    0.03 
 -34   0   2    0.00    0.03 
  34   0  -2    0.03    0.04 
  32   0  -2    0.80    0.11 
  32   0  -2    0.79    0.10 
 -32   0   2    1.07    0.10 
 -32   0   2    0.85    0.09 
 -30   0   2    2.65    0.20 
 -30   0   2    2.78    0.19 
  30   0  -2    2.79    0.22 
  30   0  -2    2.27    0.20 
 -28   0   2   -0.01    0.05 
 -28   0   2    0.02    0.05 
  28   0  -2   -0.01    0.05 
  28   0  -2   -0.01    0.06 
 -26   0   2    0.39    0.07 
  26   0  -2    0.41    0.09 
 -26   0   2    0.45    0.09 
  26   0  -2    0.52    0.10 
 -26   0   2    0.40    0.11 
  24   0  -2    1.04    0.14 
 -24   0   2    1.16    0.14 
 -24   0   2    0.94    0.11 
  24   0  -2    0.92    0.14 
 -24   0   2    0.98    0.12 
  22   0  -2    1.56    0.15 
 -22   0   2    1.88    0.23 
 -22   0   2    1.54    0.17 
 -20   0   2    1.16    0.17 
 -20   0   2    0.69    0.12 
 -20   0   2    0.98    0.10 
  20   0  -2    0.77    0.11 
  18   0  -2   11.79    0.78 
 -18   0   2   10.54    0.83 
 -18   0   2   13.99    0.80 
  18   0  -2   13.85    0.77 
  18   0  -2   10.70    0.79 
 -18   0   2   13.04    0.75 
  16   0  -2   13.91    0.85 
  16   0  -2   13.30    0.82 
 -16   0   2   14.38    0.88 
 -16   0   2   13.46    0.88 
  16   0  -2   13.82    0.86 
 -16   0   2   14.21    0.92 
 -16   0   2   13.73    0.85 
  16   0  -2   13.29    0.87 
 -16   0   2   14.61    0.84 
  14   0  -2    3.72    0.24 
  14   0  -2    3.65    0.26 
 -14   0   2    3.48    0.28 
  14   0  -2    3.93    0.28 
 -14   0   2    4.45    0.32 
 -14   0   2    3.84    0.25 
 -14   0   2    3.88    0.26 
  14   0  -2    3.62    0.27 
  12   0  -2   14.25    0.86 
 -12   0   2   14.90    0.85 
 -12   0   2   14.11    0.86 
  12   0  -2   15.13    0.87 
 -12   0   2   13.22    0.88 
  12   0  -2   13.33    0.87 
 -12   0   2   15.35    0.91 
  12   0  -2   14.09    0.84 
 -10   0   2   16.58    1.00 
  10   0  -2   15.39    0.99 
  10   0  -2   16.48    0.97 
  10   0  -2   15.73    0.99 
 -10   0   2   17.79    1.03 
 -10   0   2   16.63    0.98 
 -10   0   2   17.05    0.99 
 -10   0   2   16.79    0.99 
  -8   0   2    4.51    0.27 
  -8   0   2    3.93    0.26 
  -8   0   2    4.09    0.27 
  -8   0   2    3.88    0.28 
   8   0  -2    3.98    0.25 
  -6   0   2  206.73   13.03 
  -6   0   2  236.49   13.09 
   6   0  -2  206.43   13.01 
  -6   0   2  227.82   13.19 
  -6   0   2  242.33   13.11 
  -4   0   2  150.17    8.61 
  -4   0   2  141.49    8.66 
  -4   0   2  148.91    8.61 
  -2   0   2  915.13   59.34 
  -2   0   2  998.57   58.00 
  -2   0   2 1000.00   57.84 
   0   0   2    9.97    0.63 
   0   0   2    9.82    0.62 
   0   0  -2   11.04    0.64 
   0   0   2   10.31    0.62 
   2   0   2  137.78    7.78 
  -2   0  -2  128.09    7.75 
   2   0   2  130.26    7.74 
   4   0   2   34.08    2.07 
  -4   0  -2   35.57    2.09 
   4   0   2   36.83    2.07 
  -4   0  -2   34.83    2.07 
   4   0   2   34.49    2.06 
  -6   0  -2   23.39    1.41 
   6   0   2   22.46    1.39 
   6   0   2   24.53    1.41 
   6   0   2   22.90    1.41 
  -6   0  -2   24.92    1.44 
   8   0   2   12.39    0.75 
  -8   0  -2   11.83    0.72 
   8   0   2   12.05    0.71 
  -8   0  -2   12.16    0.77 
  -8   0  -2   11.45    0.74 
   8   0   2   11.64    0.73 
  10   0   2  160.43    8.91 
  10   0   2  132.58    8.93 
  10   0   2  167.02    8.95 
 -10   0  -2  153.11    8.91 
 -10   0  -2  152.59    8.98 
  12   0   2   17.91    1.16 
 -12   0  -2   17.41    1.21 
  12   0   2   20.24    1.13 
 -12   0  -2   19.41    1.14 
  12   0   2   19.97    1.18 
 -14   0  -2    0.41    0.06 
  14   0   2    0.41    0.09 
  14   0   2    0.30    0.09 
  14   0   2    0.34    0.06 
  16   0   2    7.39    0.56 
  16   0   2    8.08    0.50 
  16   0   2    8.37    0.55 
  18   0   2    1.22    0.17 
  18   0   2    1.57    0.17 
  18   0   2    1.39    0.12 
  20   0   2    2.49    0.20 
  20   0   2    2.96    0.26 
  20   0   2    2.63    0.28 
  22   0   2    3.74    0.33 
  22   0   2    3.81    0.29 
 -22   0  -2    4.15    0.28 
  22   0   2    4.19    0.29 
 -22   0  -2    4.00    0.27 
 -24   0  -2    4.70    0.31 
 -24   0  -2    4.36    0.31 
  24   0   2    4.75    0.33 
 -26   0  -2    0.13    0.06 
  26   0   2    0.15    0.07 
 -26   0  -2    0.12    0.05 
  26   0   2    0.07    0.06 
 -28   0  -2    0.20    0.06 
  28   0   2    0.18    0.06 
 -28   0  -2    0.24    0.06 
  28   0   2    0.30    0.07 
 -30   0  -2   -0.02    0.03 
  30   0   2   -0.01    0.04 
 -30   0  -2    0.02    0.04 
  30   0   2    0.01    0.04 
 -33  -1   2    0.01    0.04 
  33  -1  -2    0.07    0.04 
 -33  -1   2    0.08    0.04 
  33  -1  -2    0.02    0.04 
 -33   1   2    0.05    0.04 
  33   1  -2    0.07    0.05 
 -33   1   2    0.06    0.03 
 -31  -1   2    0.04    0.04 
 -31  -1   2    0.07    0.05 
  31  -1  -2    0.02    0.05 
  31  -1  -2    0.08    0.05 
 -31   1   2    0.10    0.05 
  31   1  -2    0.02    0.05 
 -31   1   2    0.13    0.06 
 -29  -1   2    1.18    0.13 
  29  -1  -2    1.18    0.14 
  29  -1  -2    1.07    0.14 
  29   1  -2    1.05    0.16 
 -29   1   2    1.16    0.12 
 -29   1   2    1.09    0.11 
  29   1  -2    0.83    0.13 
 -27  -1   2   -0.05    0.05 
 -27  -1   2   -0.04    0.05 
  27  -1  -2    0.00    0.06 
  27  -1  -2    0.03    0.06 
  27   1  -2    0.01    0.06 
 -27   1   2    0.06    0.06 
 -27   1   2    0.02    0.05 
 -27   1   2    0.02    0.05 
  27   1  -2    0.00    0.06 
  25  -1  -2    0.51    0.10 
  25  -1  -2    0.58    0.11 
 -25  -1   2    0.55    0.09 
 -25  -1   2    0.57    0.09 
 -25   1   2    0.84    0.10 
  25   1  -2    0.57    0.11 
  25   1  -2    0.45    0.13 
 -25   1   2    0.70    0.09 
 -23  -1   2    9.93    0.62 
 -23   1   2    9.15    0.61 
 -23   1   2   11.28    0.68 
 -23   1   2    8.93    0.72 
 -21  -1   2   18.66    1.14 
 -21   1   2   18.55    1.12 
 -21   1   2   19.90    1.17 
 -21   1   2   16.00    1.21 
  21   1  -2   19.12    1.14 
 -19  -1   2   14.87    0.90 
 -19  -1   2   13.28    0.97 
  19  -1  -2   13.15    0.87 
 -19  -1   2   13.52    0.90 
 -19   1   2   14.92    0.88 
  19   1  -2   15.05    0.90 
  19   1  -2   14.58    0.92 
 -19   1   2   14.57    0.97 
 -19   1   2   15.27    0.93 
  19   1  -2   14.78    0.86 
 -17  -1   2    1.22    0.10 
 -17  -1   2    1.16    0.14 
 -17  -1   2    1.45    0.18 
  17  -1  -2    1.10    0.11 
  17  -1  -2    1.34    0.20 
  17  -1  -2    1.26    0.13 
 -17  -1   2    1.44    0.13 
 -17  -1   2    1.14    0.15 
 -17   1   2    1.43    0.12 
 -17   1   2    1.29    0.15 
 -17   1   2    1.67    0.18 
  17   1  -2    1.32    0.13 
  17   1  -2    1.34    0.13 
  17   1  -2    1.44    0.14 
  17   1  -2    1.41    0.10 
 -15  -1   2    1.56    0.15 
  15  -1  -2    1.44    0.13 
  15  -1  -2    1.37    0.16 
 -15  -1   2    1.50    0.13 
 -15  -1   2    1.49    0.15 
  15  -1  -2    1.53    0.15 
 -15  -1   2    1.84    0.19 
 -15  -1   2    1.49    0.16 
 -15   1   2    2.06    0.19 
  15   1  -2    2.02    0.12 
 -15   1   2    1.74    0.17 
 -15   1   2    1.89    0.14 
  15   1  -2    1.92    0.16 
  15   1  -2    1.90    0.15 
 -13  -1   2    2.89    0.23 
  13  -1  -2    2.73    0.21 
  13  -1  -2    3.34    0.23 
 -13  -1   2    3.79    0.27 
  13  -1  -2    3.34    0.24 
 -13  -1   2    3.27    0.21 
 -13  -1   2    3.50    0.23 
 -13   1   2    3.64    0.27 
  13   1  -2    3.16    0.20 
 -13   1   2    2.77    0.23 
 -13   1   2    3.15    0.21 
 -13   1   2    3.04    0.22 
  13   1  -2    2.68    0.22 
  13   1  -2    2.87    0.22 
 -11  -1   2    2.15    0.17 
  11  -1  -2    1.94    0.15 
  11  -1  -2    2.36    0.18 
  11  -1  -2    2.15    0.18 
 -11  -1   2    2.05    0.17 
 -11  -1   2    2.45    0.20 
 -11  -1   2    2.34    0.16 
 -11  -1   2    2.33    0.17 
 -11   1   2    2.55    0.20 
  11   1  -2    2.52    0.15 
  11   1  -2    2.40    0.17 
  11   1  -2    2.11    0.17 
 -11   1   2    2.31    0.17 
 -11   1   2    2.29    0.16 
 -11   1   2    2.35    0.16 
  -9  -1   2   60.66    3.33 
  -9  -1   2   57.35    3.30 
  -9  -1   2   54.67    3.31 
   9  -1  -2   58.22    3.30 
  -9  -1   2   56.37    3.29 
  -9  -1   2   53.27    3.30 
   9  -1  -2   53.98    3.30 
  -9  -1   2   57.26    3.28 
  -9   1   2   60.96    3.30 
   9   1  -2   56.97    3.28 
  -9   1   2   58.33    3.32 
   9   1  -2   51.26    3.29 
  -9   1   2   51.59    3.28 
  -9   1   2   57.07    3.29 
  -7  -1   2   95.41    5.62 
   7  -1  -2   94.60    5.63 
  -7  -1   2   95.59    5.68 
  -7  -1   2   94.49    5.62 
  -7   1   2   95.89    5.70 
  -7   1   2   97.68    5.62 
  -7   1   2  101.68    5.62 
   7   1  -2   96.95    5.63 
  -5  -1   2    8.30    0.52 
   5  -1  -2    7.92    0.53 
  -5  -1   2    9.76    0.55 
  -5  -1   2    7.79    0.51 
  -5   1   2    8.86    0.53 
   5   1  -2    8.49    0.51 
  -5   1   2    8.18    0.52 
  -5   1   2    9.49    0.54 
  -3  -1   2    8.73    0.56 
  -3  -1   2    8.69    0.58 
   3  -1  -2    7.96    0.56 
   3  -1  -2    8.54    0.57 
  -3  -1   2    8.18    0.55 
  -3   1   2   10.70    0.57 
  -3   1   2   10.41    0.56 
   3   1  -2    9.93    0.55 
  -3   1   2   10.44    0.57 
   1  -1  -2    8.50    0.57 
  -1  -1   2    8.30    0.55 
  -1  -1   2    8.91    0.57 
   1  -1  -2    8.54    0.57 
  -1  -1   2    8.60    0.55 
  -1   1   2    9.83    0.56 
  -1   1   2    9.62    0.55 
  -1   1   2   10.19    0.56 
   1   1  -2    9.72    0.58 
   1   1  -2    9.59    0.54 
   1  -1   2   21.30    1.30 
   1  -1   2   23.06    1.33 
  -1  -1  -2   22.92    1.33 
  -1  -1  -2   21.30    1.32 
   1  -1   2   19.99    1.31 
   1   1   2   21.94    1.30 
   1   1   2   23.54    1.32 
  -1   1  -2   21.72    1.30 
  -1   1  -2   23.53    1.33 
   3  -1   2   12.26    0.75 
   3  -1   2   12.38    0.74 
  -3  -1  -2   11.51    0.77 
   3  -1   2   11.83    0.74 
   3  -1   2   11.32    0.75 
  -3  -1  -2   12.83    0.76 
   3  -1   2   12.71    0.78 
  -3   1  -2   12.48    0.77 
  -3   1  -2   12.97    0.74 
   3   1   2   12.97    0.76 
   3   1   2   13.72    0.74 
   5  -1   2    3.13    0.21 
   5  -1   2    3.30    0.23 
  -5  -1  -2    3.14    0.23 
  -5  -1  -2    3.04    0.24 
   5  -1   2    2.89    0.22 
  -5   1  -2    3.27    0.20 
  -5   1  -2    3.40    0.25 
   5   1   2    3.27    0.21 
   5   1   2    3.12    0.22 
   7  -1   2    4.00    0.30 
   7  -1   2    4.72    0.32 
  -7  -1  -2    4.36    0.32 
  -7  -1  -2    4.42    0.32 
   7  -1   2    4.64    0.29 
  -7   1  -2    4.32    0.30 
   7   1   2    4.81    0.31 
   7   1   2    4.76    0.30 
  -7   1  -2    4.81    0.34 
  -7   1  -2    4.55    0.28 
   9  -1   2    4.30    0.32 
  -9  -1  -2    4.60    0.32 
  -9  -1  -2    3.69    0.30 
   9  -1   2    4.03    0.28 
  -9   1  -2    4.40    0.27 
   9   1   2    4.38    0.29 
  -9   1  -2    5.05    0.35 
   9   1   2    4.68    0.31 
   9   1   2    4.15    0.27 
  -9   1  -2    3.98    0.30 
 -11  -1  -2    1.15    0.13 
  11  -1   2    1.15    0.14 
  11  -1   2    1.07    0.11 
 -11   1  -2    1.47    0.10 
 -11   1  -2    1.15    0.16 
  11   1   2    1.47    0.14 
  11   1   2    1.49    0.11 
  11   1   2    1.61    0.13 
  13  -1   2    3.33    0.29 
  13  -1   2    3.88    0.26 
  13  -1   2    3.92    0.32 
 -13   1  -2    4.47    0.35 
 -13   1  -2    4.00    0.28 
  13   1   2    3.87    0.29 
  13   1   2    4.10    0.26 
  13   1   2    3.58    0.28 
  15  -1   2    7.96    0.51 
  15  -1   2    7.92    0.56 
  15  -1   2    8.62    0.59 
 -15   1  -2    7.81    0.61 
  15   1   2    8.74    0.57 
 -15   1  -2    8.38    0.54 
  15   1   2    8.16    0.51 
  17  -1   2    2.13    0.23 
  17  -1   2    2.15    0.21 
  17  -1   2    1.92    0.16 
  17   1   2    2.10    0.16 
 -17   1  -2    2.10    0.17 
  17   1   2    1.94    0.21 
  19  -1   2    1.63    0.14 
  19  -1   2    1.92    0.20 
  19  -1   2    1.47    0.21 
  19   1   2    2.11    0.21 
  19   1   2    1.71    0.20 
  19   1   2    2.09    0.16 
 -21  -1  -2    3.25    0.23 
 -21  -1  -2    3.36    0.24 
  21  -1   2    3.44    0.28 
  21  -1   2    3.59    0.25 
  21  -1   2    3.36    0.25 
  21   1   2    3.07    0.25 
  21   1   2    2.87    0.24 
 -21   1  -2    2.99    0.23 
 -21   1  -2    2.77    0.22 
  21   1   2    3.02    0.28 
  23  -1   2    3.15    0.23 
  23  -1   2    2.73    0.23 
 -23  -1  -2    2.85    0.21 
  23  -1   2    2.97    0.24 
 -23  -1  -2    2.66    0.21 
 -23   1  -2    2.36    0.20 
  23   1   2    2.58    0.22 
 -23   1  -2    2.84    0.21 
  23   1   2    2.91    0.27 
  23   1   2    2.91    0.23 
  25  -1   2    0.90    0.13 
  25  -1   2    0.85    0.13 
 -25  -1  -2    1.08    0.11 
 -25  -1  -2    0.80    0.11 
  25   1   2    1.06    0.13 
 -25   1  -2    1.06    0.12 
  25   1   2    1.13    0.13 
 -25   1  -2    1.11    0.11 
  27  -1   2    1.11    0.13 
 -27  -1  -2    1.09    0.11 
 -27  -1  -2    1.12    0.12 
  27  -1   2    1.02    0.13 
 -27   1  -2    1.03    0.11 
  27   1   2    1.18    0.13 
  27   1   2    1.06    0.12 
 -27   1  -2    1.05    0.11 
  29  -1   2   -0.01    0.04 
  29  -1   2   -0.02    0.05 
 -29  -1  -2    0.01    0.04 
 -29  -1  -2   -0.04    0.04 
 -29   1  -2    0.04    0.04 
  29   1   2    0.02    0.04 
  29   1   2    0.08    0.05 
 -29   1  -2    0.05    0.04 
 -31  -1  -2    0.04    0.03 
 -31  -1  -2    0.06    0.03 
  31  -1   2    0.03    0.04 
  31   1   2    0.03    0.03 
  31   1   2    0.04    0.04 
 -31   1  -2    0.01    0.03 
 -31   1  -2    0.02    0.03 
 -34   2   2    0.21    0.05 
  32  -2  -2    0.02    0.04 
 -32  -2   2    0.02    0.04 
 -32  -2   2    0.04    0.04 
  32  -2  -2    0.07    0.05 
  32   2  -2    0.05    0.05 
 -32   2   2    0.02    0.03 
 -32   2   2    0.03    0.04 
  30  -2  -2    1.35    0.14 
  30  -2  -2    1.08    0.13 
 -30  -2   2    1.19    0.13 
 -30  -2   2    1.06    0.11 
 -30   2   2    1.32    0.13 
 -30   2   2    1.02    0.11 
  30   2  -2    1.14    0.13 
  28  -2  -2    1.64    0.17 
 -28  -2   2    1.47    0.14 
  28  -2  -2    1.40    0.16 
 -28  -2   2    1.55    0.15 
 -28   2   2    1.35    0.13 
 -28   2   2    1.58    0.14 
  28   2  -2    1.31    0.15 
  26  -2  -2    8.10    0.54 
 -26  -2   2    7.81    0.51 
  26  -2  -2    8.14    0.54 
 -26  -2   2    7.58    0.52 
 -26   2   2    8.48    0.52 
 -26   2   2    8.32    0.51 
  26   2  -2    7.67    0.54 
  26   2  -2    8.63    0.54 
 -24  -2   2   19.53    1.23 
  24  -2  -2   20.52    1.26 
  24  -2  -2   19.32    1.25 
 -24  -2   2   20.13    1.24 
 -24   2   2   19.49    1.22 
 -24   2   2   21.39    1.30 
  24   2  -2   20.11    1.25 
 -24   2   2   22.03    1.23 
  24   2  -2   21.92    1.27 
 -22  -2   2    7.57    0.61 
 -22   2   2    8.15    0.65 
 -22   2   2    9.44    0.56 
  22   2  -2    9.35    0.59 
 -22   2   2    9.56    0.62 
  22   2  -2    8.35    0.54 
 -20  -2   2    2.76    0.24 
 -20  -2   2    2.64    0.21 
 -20  -2   2    2.64    0.26 
 -20   2   2    2.71    0.22 
 -20   2   2    2.88    0.27 
  20   2  -2    3.05    0.24 
  20   2  -2    3.40    0.27 
 -20   2   2    3.02    0.30 
  20   2  -2    2.91    0.20 
 -18  -2   2    2.43    0.24 
 -18  -2   2    2.20    0.27 
  18  -2  -2    2.40    0.22 
 -18  -2   2    2.58    0.19 
 -18  -2   2    2.70    0.21 
  18   2  -2    2.46    0.17 
 -18   2   2    2.56    0.19 
 -18   2   2    2.49    0.25 
  18   2  -2    2.56    0.21 
  18   2  -2    2.40    0.21 
 -16  -2   2   15.50    1.00 
  16  -2  -2   15.25    0.95 
 -16  -2   2   16.45    0.94 
 -16  -2   2   15.39    0.97 
 -16  -2   2   15.03    0.93 
  16   2  -2   13.95    0.94 
 -16   2   2   16.35    1.00 
 -16   2   2   15.48    0.92 
  16   2  -2   14.27    0.93 
 -16   2   2   13.22    0.93 
  16   2  -2   15.98    0.91 
 -14  -2   2   22.46    1.36 
 -14  -2   2   23.69    1.34 
  14  -2  -2   21.39    1.37 
 -14  -2   2   21.41    1.30 
 -14  -2   2   22.56    1.39 
 -14  -2   2   22.01    1.33 
  14  -2  -2   23.60    1.35 
  14   2  -2   22.65    1.31 
 -14   2   2   23.50    1.39 
 -14   2   2   20.57    1.34 
 -14   2   2   21.95    1.31 
  14   2  -2   20.08    1.33 
  14   2  -2   21.82    1.34 
 -12  -2   2   34.55    2.13 
  12  -2  -2   34.70    2.15 
 -12  -2   2   37.34    2.18 
  12  -2  -2   36.95    2.15 
 -12  -2   2   36.40    2.11 
 -12  -2   2   34.63    2.13 
 -12  -2   2   35.54    2.16 
 -12   2   2   39.03    2.18 
 -12   2   2   37.35    2.14 
  12   2  -2   37.26    2.14 
  12   2  -2   37.07    2.11 
  12   2  -2   33.79    2.13 
 -12   2   2   34.20    2.12 
 -10  -2   2   56.12    3.15 
 -10  -2   2   54.68    3.09 
 -10  -2   2   49.18    3.12 
  10  -2  -2   52.20    3.13 
 -10  -2   2   51.64    3.13 
  10  -2  -2   52.02    3.12 
 -10  -2   2   48.92    3.11 
 -10  -2   2   54.71    3.11 
  10   2  -2   53.77    3.11 
 -10   2   2   55.46    3.11 
  10   2  -2   54.12    3.09 
 -10   2   2   57.25    3.15 
 -10   2   2   52.55    3.10 
  10   2  -2   49.79    3.11 
   8  -2  -2  171.19   11.02 
  -8  -2   2  195.12   11.14 
  -8  -2   2  188.49   11.00 
   8  -2  -2  187.66   11.05 
  -8  -2   2  200.58   11.13 
  -8  -2   2  199.37   11.00 
  -8  -2   2  169.15   11.05 
   8   2  -2  180.79   10.98 
   8   2  -2  184.04   11.03 
  -8   2   2  187.68   11.00 
   8   2  -2  195.45   11.01 
  -8   2   2  195.74   11.07 
  -8   2   2  201.23   11.05 
   6  -2  -2   23.63    1.35 
  -6  -2   2   23.16    1.34 
  -6  -2   2   21.97    1.36 
  -6  -2   2   23.89    1.37 
  -6  -2   2   23.72    1.33 
   6   2  -2   21.30    1.34 
  -6   2   2   22.31    1.34 
  -6   2   2   22.08    1.35 
  -6   2   2   23.23    1.33 
  -6   2   2   21.67    1.33 
   6   2  -2   21.78    1.33 
   4  -2  -2   88.78    5.08 
   4  -2  -2   75.19    5.05 
  -4  -2   2   85.58    5.11 
  -4  -2   2   87.90    5.07 
   4  -2  -2   91.03    5.06 
  -4  -2   2   88.03    5.10 
  -4   2   2   86.05    5.06 
   4   2  -2   86.58    5.06 
  -4   2   2   84.84    5.07 
  -4   2   2   87.39    5.05 
   4   2  -2   85.98    5.05 
  -4   2   2   93.20    5.05 
   2  -2  -2  281.08   16.57 
   2  -2  -2  288.13   16.53 
   2  -2  -2  272.83   16.56 
  -2  -2   2  278.15   16.43 
  -2  -2   2  274.03   16.48 
  -2  -2   2  286.20   17.43 
   2   2  -2  281.37   16.45 
   2   2  -2  283.31   16.50 
  -2   2   2  292.06   16.42 
  -2   2   2  291.17   16.49 
   2   2  -2  285.21   16.67 
  -2   2   2  273.66   16.47 
   0  -2  -2  242.94   14.08 
   0  -2   2  244.39   13.96 
   0  -2  -2  228.68   13.99 
   0  -2   2  227.97   13.99 
   0  -2   2  245.73   14.14 
   0  -2   2  243.31   14.09 
   0  -2  -2  242.05   14.15 
   0   2   2  243.51   13.94 
   0   2  -2  240.70   14.04 
   0   2  -2  245.79   14.20 
   0   2  -2  240.79   13.98 
   0   2   2  229.17   13.99 
   2  -2   2  132.42    7.51 
  -2  -2  -2  128.37    7.43 
  -2  -2  -2  131.42    7.55 
   2  -2   2  131.66    7.44 
   2  -2   2  129.56    7.55 
  -2   2  -2  130.73    7.61 
   2   2   2  128.81    7.43 
  -2   2  -2  119.54    7.47 
  -2   2  -2  127.56    7.44 
   2   2   2  114.06    7.43 
   4  -2   2   30.71    1.79 
  -4  -2  -2   30.12    1.83 
   4  -2   2   31.77    1.84 
  -4  -2  -2   30.51    1.82 
   4  -2   2   31.50    1.82 
   4   2   2   28.73    1.80 
   4   2   2   29.70    1.79 
  -4   2  -2   30.80    1.79 
  -4   2  -2   32.79    1.84 
  -4   2  -2   28.36    1.80 
  -6  -2  -2   78.07    4.42 
   6  -2   2   68.76    4.39 
   6  -2   2   79.05    4.41 
   6  -2   2   77.85    4.37 
  -6  -2  -2   76.80    4.41 
  -6   2  -2   72.94    4.37 
  -6   2  -2   78.93    4.43 
   6   2   2   73.32    4.37 
   6   2   2   68.64    4.38 
   8  -2   2   68.04    4.19 
   8  -2   2   75.39    4.22 
  -8  -2  -2   70.90    4.21 
  -8  -2  -2   74.37    4.22 
   8  -2   2   73.10    4.16 
  -8   2  -2   76.76    4.24 
  -8   2  -2   70.18    4.16 
   8   2   2   69.13    4.19 
  -8   2  -2   62.28    4.19 
   8   2   2   73.82    4.17 
 -10  -2  -2   49.66    2.86 
  10  -2   2   46.71    2.81 
  10  -2   2   50.55    2.88 
  10  -2   2   44.44    2.84 
 -10  -2  -2   46.44    2.86 
  10   2   2   47.86    2.82 
 -10   2  -2   44.07    2.84 
 -10   2  -2   53.36    2.91 
 -10   2  -2   48.81    2.81 
  10   2   2   47.68    2.84 
  12  -2   2   62.03    3.48 
  12  -2   2   61.45    3.56 
 -12  -2  -2   61.57    3.54 
 -12  -2  -2   59.81    3.54 
  12  -2   2   58.56    3.52 
  12   2   2   52.08    3.50 
  12   2   2   59.56    3.50 
  12   2   2   62.69    3.52 
 -12   2  -2   57.19    3.51 
 -12   2  -2   61.52    3.48 
 -12   2  -2   58.16    3.58 
  14  -2   2    1.27    0.10 
  14  -2   2    1.25    0.16 
 -14  -2  -2    1.32    0.20 
  14   2   2    0.96    0.12 
 -14   2  -2    1.08    0.13 
  14   2   2    0.95    0.13 
 -14   2  -2    1.20    0.10 
  14   2   2    0.91    0.09 
  14   2   2    1.03    0.13 
  16  -2   2    0.61    0.08 
  16  -2   2    0.79    0.12 
  16  -2   2    0.67    0.13 
 -16   2  -2    0.82    0.12 
  16   2   2    0.67    0.11 
  16   2   2    0.60    0.11 
  16   2   2    0.62    0.07 
 -16   2  -2    0.52    0.07 
 -16   2  -2    0.58    0.16 
  18  -2   2    3.95    0.31 
  18  -2   2    4.07    0.37 
 -18   2  -2    3.74    0.39 
  18   2   2    4.29    0.34 
  18   2   2    3.86    0.27 
 -18   2  -2    4.27    0.31 
  18   2   2    3.98    0.28 
  20  -2   2   15.85    0.95 
  20  -2   2   16.03    0.98 
  20  -2   2   14.13    1.03 
 -20   2  -2   14.93    0.93 
  20   2   2   14.27    0.92 
 -22  -2  -2    0.18    0.08 
 -22  -2  -2    0.13    0.06 
  22  -2   2    0.26    0.08 
  22  -2   2    0.11    0.07 
  22  -2   2    0.08    0.06 
 -22  -2  -2    0.25    0.07 
  22  -2   2    0.33    0.08 
  22   2   2    0.36    0.08 
  22   2   2    0.33    0.11 
 -22   2  -2    0.07    0.05 
  22   2   2    0.09    0.06 
  22   2   2    0.11    0.04 
 -22   2  -2    0.17    0.06 
 -24  -2  -2    0.60    0.09 
  24  -2   2    0.57    0.11 
 -24  -2  -2    0.71    0.10 
  24  -2   2    0.65    0.11 
  24  -2   2    0.83    0.12 
  24   2   2    1.08    0.12 
  24   2   2    1.05    0.13 
 -26  -2  -2    1.49    0.14 
  26  -2   2    1.61    0.16 
  26  -2   2    1.33    0.15 
 -26  -2  -2    1.45    0.13 
 -26   2  -2    1.51    0.14 
  26   2   2    1.58    0.15 
 -26   2  -2    1.51    0.13 
  26   2   2    1.48    0.15 
  28  -2   2    0.15    0.06 
 -28  -2  -2    0.13    0.05 
  28  -2   2    0.14    0.06 
 -28  -2  -2    0.12    0.04 
  28   2   2    0.14    0.06 
  28   2   2    0.12    0.05 
 -28   2  -2    0.04    0.04 
 -28   2  -2    0.13    0.05 
 -30  -2  -2    0.20    0.04 
 -30  -2  -2    0.24    0.05 
  30  -2   2    0.24    0.06 
  30   2   2    0.16    0.05 
 -30   2  -2    0.19    0.04 
  30   2   2    0.17    0.05 
 -30   2  -2    0.18    0.04 
  33  -3  -2    0.21    0.05 
  33  -3  -2    0.19    0.05 
 -33  -3   2    0.14    0.04 
 -33  -3   2    0.23    0.05 
 -33   3   2    0.13    0.04 
  33   3  -2    0.08    0.04 
 -33   3   2    0.10    0.03 
 -31  -3   2    0.48    0.07 
  31  -3  -2    0.58    0.09 
 -31  -3   2    0.52    0.08 
  31  -3  -2    0.37    0.08 
 -31   3   2    0.41    0.06 
 -31   3   2    0.53    0.07 
  31   3  -2    0.44    0.08 
  29  -3  -2    0.02    0.06 
  29  -3  -2    0.13    0.06 
 -29  -3   2    0.08    0.06 
 -29  -3   2    0.08    0.05 
 -29   3   2    0.02    0.05 
 -29   3   2    0.04    0.04 
  29   3  -2    0.02    0.05 
  27  -3  -2    0.73    0.11 
  27  -3  -2    0.91    0.13 
 -27  -3   2    0.77    0.10 
 -27  -3   2    0.89    0.11 
  27   3  -2    0.69    0.11 
 -27   3   2    0.70    0.09 
 -27   3   2    0.76    0.10 
  25  -3  -2    1.09    0.15 
  25  -3  -2    0.62    0.11 
 -25  -3   2    0.99    0.13 
 -25  -3   2    0.70    0.10 
 -25   3   2    0.96    0.16 
 -25   3   2    0.84    0.10 
 -25   3   2    0.61    0.09 
  25   3  -2    0.58    0.11 
  25   3  -2    0.98    0.13 
 -23  -3   2    6.56    0.44 
 -23  -3   2    5.85    0.44 
  23  -3  -2    5.72    0.45 
  23  -3  -2    7.27    0.46 
 -23   3   2    6.88    0.42 
 -23   3   2    7.11    0.43 
 -23   3   2    6.97    0.41 
 -23   3   2    5.67    0.48 
  23   3  -2    7.65    0.46 
 -21  -3   2    1.33    0.17 
  21   3  -2    1.73    0.18 
 -21   3   2    1.78    0.22 
  21   3  -2    1.69    0.22 
 -21   3   2    1.69    0.15 
 -19  -3   2    0.30    0.08 
 -19  -3   2    0.50    0.13 
  19   3  -2    0.30    0.09 
 -19   3   2    0.24    0.05 
 -19   3   2    0.23    0.07 
  19   3  -2    0.26    0.08 
  19   3  -2    0.17    0.04 
 -19   3   2    0.21    0.10 
  17  -3  -2   12.27    0.77 
 -17  -3   2   11.99    0.75 
 -17  -3   2   11.49    0.78 
 -17   3   2   11.32    0.79 
  17   3  -2   10.73    0.75 
 -17   3   2   11.34    0.72 
  17   3  -2   12.00    0.71 
  17   3  -2   11.62    0.74 
  15  -3  -2   11.66    0.69 
 -15  -3   2   10.11    0.63 
 -15  -3   2   11.25    0.70 
 -15  -3   2   10.32    0.66 
  15   3  -2   10.80    0.63 
 -15   3   2    9.97    0.70 
 -15   3   2   10.50    0.66 
 -15   3   2    8.76    0.64 
  15   3  -2    9.83    0.67 
  15   3  -2   10.41    0.66 
 -13  -3   2   16.05    1.00 
 -13  -3   2   16.91    1.06 
  13  -3  -2   18.14    1.06 
 -13  -3   2   17.35    1.03 
 -13  -3   2   17.48    1.07 
 -13   3   2   14.59    1.03 
  13   3  -2   16.67    1.04 
 -13   3   2   17.14    1.07 
 -13   3   2   17.00    1.03 
  13   3  -2   17.18    1.00 
  11  -3  -2   12.56    0.77 
 -11  -3   2   11.39    0.78 
 -11  -3   2   11.52    0.76 
 -11  -3   2   12.89    0.78 
 -11  -3   2   11.89    0.77 
 -11  -3   2   12.02    0.75 
 -11  -3   2   12.31    0.73 
  11  -3  -2   11.16    0.76 
 -11   3   2   12.25    0.78 
  11   3  -2   11.61    0.74 
 -11   3   2   12.51    0.74 
  11   3  -2   12.33    0.72 
  11   3  -2   12.24    0.75 
   9  -3  -2    6.75    0.47 
   9  -3  -2    6.77    0.46 
  -9  -3   2    6.88    0.48 
  -9  -3   2    6.94    0.45 
  -9  -3   2    6.21    0.47 
  -9  -3   2    6.37    0.44 
  -9  -3   2    6.43    0.47 
  -9   3   2    8.19    0.45 
   9   3  -2    7.30    0.43 
   9   3  -2    7.59    0.45 
  -9   3   2    8.15    0.48 
   9   3  -2    8.10    0.46 
  -7  -3   2   10.60    0.64 
  -7  -3   2   10.44    0.61 
   7  -3  -2    9.29    0.61 
  -7  -3   2    9.27    0.63 
  -7  -3   2    8.89    0.59 
   7  -3  -2   10.27    0.63 
  -7  -3   2   10.22    0.64 
  -7   3   2   10.01    0.60 
   7   3  -2    9.66    0.59 
  -7   3   2   10.08    0.62 
   7   3  -2    9.79    0.60 
   5  -3  -2  118.95    6.48 
  -5  -3   2  114.07    6.51 
  -5  -3   2  111.60    6.49 
   5  -3  -2   97.09    6.46 
   5  -3  -2  112.09    6.48 
  -5  -3   2  113.27    6.50 
  -5  -3   2  112.14    6.51 
   5   3  -2  114.00    6.46 
  -5   3   2  107.48    6.46 
  -5   3   2  113.82    6.46 
   5   3  -2  107.25    6.46 
  -5   3   2  109.71    6.46 
   3  -3  -2   39.31    2.16 
   3  -3  -2   41.47    2.16 
   3  -3  -2   33.46    2.15 
  -3  -3   2   34.84    2.17 
  -3  -3   2   37.38    2.14 
   3   3  -2   35.61    2.13 
   3   3  -2   40.17    2.15 
  -3   3   2   36.90    2.14 
  -3   3   2   32.72    2.12 
  -3   3   2   32.37    2.13 
   1  -3  -2   90.43    5.04 
   1  -3  -2   85.99    5.02 
  -1  -3   2   83.20    5.01 
  -1  -3   2   86.26    5.05 
   1  -3  -2   87.45    5.04 
   1   3  -2   88.07    5.04 
   1   3  -2   87.67    5.05 
   1   3  -2   79.16    5.02 
   1  -3   2  107.47    5.99 
   1  -3   2   90.46    5.95 
   1  -3   2   98.15    6.00 
  -1  -3  -2  108.54    5.99 
  -1  -3  -2  105.14    5.97 
  -1  -3  -2  104.28    6.00 
  -1   3  -2   98.88    5.98 
  -1   3  -2  106.09    6.00 
  -1   3  -2  102.31    5.97 
   3  -3   2    0.93    0.10 
  -3  -3  -2    0.99    0.11 
   3  -3   2    0.85    0.11 
  -3  -3  -2    1.03    0.11 
   3  -3   2    0.85    0.09 
  -3  -3  -2    0.86    0.08 
  -5  -3  -2   17.12    0.98 
   5  -3   2   16.08    0.94 
   5  -3   2   16.29    0.97 
  -5  -3  -2   15.77    0.98 
   5  -3   2   15.33    0.94 
   5  -3   2   14.91    0.98 
  -5   3  -2   15.07    0.98 
  -5   3  -2   15.25    0.94 
  -5   3  -2   15.05    0.93 
   5   3   2   15.96    0.92 
   5   3   2   14.27    0.94 
   7  -3   2    1.77    0.10 
   7  -3   2    1.91    0.17 
  -7  -3  -2    1.71    0.17 
   7  -3   2    1.52    0.17 
  -7   3  -2    1.29    0.14 
   7   3   2    1.42    0.12 
  -7   3  -2    1.20    0.15 
  -7   3  -2    1.28    0.13 
  -7   3  -2    1.34    0.12 
   7   3   2    1.50    0.13 
  -9  -3  -2   21.74    1.25 
   9  -3   2   16.98    1.17 
   9  -3   2   21.97    1.26 
  -9  -3  -2   21.34    1.25 
   9  -3   2   19.96    1.21 
   9   3   2   20.11    1.19 
   9   3   2   19.09    1.21 
  -9   3  -2   17.81    1.22 
  -9   3  -2   19.75    1.19 
  -9   3  -2   21.00    1.28 
 -11  -3  -2   34.30    2.08 
 -11  -3  -2   36.67    2.09 
  11  -3   2   32.50    2.04 
  11  -3   2   34.38    2.10 
  11   3   2   29.70    2.03 
 -11   3  -2   35.92    2.02 
 -11   3  -2   34.90    2.12 
  11   3   2   33.16    2.05 
 -11   3  -2   34.31    2.06 
  11   3   2   36.56    2.03 
 -13  -3  -2    3.80    0.32 
  13  -3   2    4.24    0.35 
  13   3   2    4.20    0.29 
  13   3   2    3.55    0.30 
 -13   3  -2    3.51    0.35 
 -13   3  -2    4.67    0.32 
  13   3   2    3.45    0.29 
 -13   3  -2    4.28    0.27 
 -15  -3  -2    9.90    0.68 
  15  -3   2    9.22    0.70 
  15  -3   2   10.51    0.63 
 -15   3  -2    9.67    0.60 
 -15   3  -2    9.19    0.72 
 -15   3  -2   10.29    0.65 
  15   3   2    9.21    0.63 
  15   3   2    9.27    0.63 
  15   3   2    9.57    0.65 
  17  -3   2    1.76    0.16 
  17  -3   2    1.68    0.22 
  17   3   2    1.70    0.14 
  17   3   2    1.65    0.18 
 -17   3  -2    1.59    0.23 
 -17   3  -2    1.59    0.13 
 -17   3  -2    1.86    0.19 
  17   3   2    1.41    0.14 
  17   3   2    1.60    0.17 
  19  -3   2    2.82    0.30 
  19   3   2    2.58    0.25 
 -19   3  -2    2.78    0.24 
  19   3   2    2.73    0.20 
 -19   3  -2    2.16    0.30 
  19   3   2    2.49    0.20 
  21  -3   2    3.47    0.28 
 -21  -3  -2    3.59    0.27 
 -21  -3  -2    3.60    0.27 
 -21  -3  -2    3.73    0.27 
  21  -3   2    3.42    0.28 
  21   3   2    3.53    0.27 
 -21   3  -2    3.62    0.29 
 -21   3  -2    4.06    0.26 
  21   3   2    3.70    0.27 
 -21   3  -2    4.05    0.26 
  21   3   2    3.67    0.27 
  21   3   2    4.05    0.25 
 -23  -3  -2    0.67    0.10 
 -23  -3  -2    0.73    0.10 
  23  -3   2    0.81    0.12 
  23  -3   2    0.67    0.11 
  23   3   2    0.86    0.11 
 -23   3  -2    0.79    0.09 
  23   3   2    0.73    0.08 
  23   3   2    0.76    0.11 
 -23   3  -2    0.74    0.09 
 -25  -3  -2    0.53    0.09 
  25  -3   2    0.61    0.10 
 -25  -3  -2    0.41    0.07 
  25  -3   2    0.49    0.09 
  25   3   2    0.52    0.09 
 -25   3  -2    0.49    0.07 
  25   3   2    0.45    0.09 
 -25   3  -2    0.46    0.08 
 -27  -3  -2    2.65    0.19 
  27  -3   2    2.47    0.20 
  27  -3   2    2.70    0.20 
 -27  -3  -2    2.52    0.18 
  27   3   2    2.00    0.18 
 -27   3  -2    2.40    0.18 
  27   3   2    2.57    0.20 
 -27   3  -2    2.56    0.18 
  29  -3   2    0.25    0.06 
 -29  -3  -2    0.20    0.04 
 -29  -3  -2    0.16    0.05 
  29  -3   2    0.15    0.05 
  29   3   2    0.14    0.05 
 -29   3  -2    0.24    0.05 
 -29   3  -2    0.15    0.04 
 -32  -4   2    0.16    0.04 
  32  -4  -2    0.26    0.06 
  32  -4  -2    0.23    0.05 
 -32  -4   2    0.21    0.05 
 -32   4   2    0.20    0.04 
 -32   4   2    0.22    0.04 
  32   4  -2    0.15    0.05 
 -30  -4   2    0.05    0.05 
 -30  -4   2    0.05    0.04 
  30  -4  -2    0.06    0.05 
  30  -4  -2    0.05    0.05 
  30   4  -2    0.07    0.05 
 -30   4   2    0.06    0.05 
 -30   4   2    0.06    0.04 
  28  -4  -2    1.31    0.15 
 -28  -4   2    1.18    0.13 
  28  -4  -2    1.32    0.14 
 -28  -4   2    1.21    0.14 
 -28   4   2    1.52    0.13 
  28   4  -2    1.37    0.14 
 -28   4   2    1.34    0.12 
  26  -4  -2    0.13    0.07 
 -26  -4   2    0.08    0.06 
  26  -4  -2    0.12    0.07 
 -26  -4   2    0.14    0.06 
 -26   4   2    0.11    0.06 
  26   4  -2    0.16    0.07 
 -26   4   2    0.10    0.05 
  24  -4  -2    3.37    0.27 
 -24  -4   2    3.09    0.25 
 -24  -4   2    3.24    0.24 
  24  -4  -2    3.21    0.25 
  24   4  -2    3.19    0.26 
  24   4  -2    3.01    0.26 
 -24   4   2    3.31    0.23 
 -24   4   2    2.99    0.22 
 -24   4   2    2.53    0.28 
 -24   4   2    3.07    0.20 
 -22  -4   2    9.38    0.60 
 -22  -4   2    9.40    0.59 
  22  -4  -2    9.89    0.62 
  22  -4  -2    9.48    0.60 
 -22   4   2    8.48    0.57 
 -22   4   2    9.26    0.58 
  22   4  -2    9.66    0.63 
 -22   4   2    9.24    0.56 
  22   4  -2    9.24    0.60 
  22   4  -2    8.60    0.57 
 -20  -4   2    1.64    0.21 
 -20  -4   2    1.48    0.17 
  20   4  -2    1.64    0.18 
  20   4  -2    1.73    0.14 
 -20   4   2    1.51    0.21 
  20   4  -2    1.45    0.18 
 -20   4   2    1.63    0.13 
 -20   4   2    1.40    0.15 
 -18  -4   2    3.45    0.32 
 -18  -4   2    3.28    0.28 
  18  -4  -2    3.38    0.30 
 -18   4   2    3.67    0.33 
 -18   4   2    3.65    0.24 
  18   4  -2    3.92    0.25 
  18   4  -2    3.79    0.30 
 -18   4   2    3.63    0.26 
 -18   4   2    3.61    0.28 
  18   4  -2    3.46    0.27 
 -16  -4   2    3.27    0.27 
 -16  -4   2    3.39    0.30 
  16  -4  -2    3.42    0.29 
 -16   4   2    3.60    0.31 
  16   4  -2    3.59    0.24 
  16   4  -2    3.68    0.29 
 -16   4   2    3.37    0.26 
  14  -4  -2    0.19    0.08 
 -14  -4   2    0.30    0.11 
 -14  -4   2    0.22    0.09 
 -14  -4   2    0.24    0.08 
 -14   4   2    0.15    0.08 
 -14   4   2    0.12    0.05 
 -14   4   2    0.11    0.05 
  14   4  -2    0.18    0.04 
  14   4  -2    0.11    0.06 
  14   4  -2    0.17    0.07 
 -12  -4   2    5.25    0.40 
  12  -4  -2    6.01    0.40 
 -12  -4   2    6.04    0.41 
 -12  -4   2    5.39    0.37 
 -12   4   2    5.48    0.36 
  12   4  -2    5.34    0.37 
  12   4  -2    5.09    0.34 
 -12   4   2    5.04    0.39 
  12   4  -2    5.22    0.35 
  12   4  -2    4.31    0.39 
  10  -4  -2   11.72    0.84 
 -10  -4   2   14.03    0.87 
  10  -4  -2   13.14    0.85 
 -10  -4   2   13.65    0.87 
 -10  -4   2   13.04    0.83 
 -10   4   2   13.89    0.82 
  10   4  -2   13.49    0.82 
  10   4  -2   12.81    0.80 
 -10   4   2   13.92    0.85 
  10   4  -2   13.93    0.83 
   8  -4  -2    1.18    0.13 
   8  -4  -2    0.97    0.11 
  -8  -4   2    1.03    0.13 
  -8  -4   2    1.30    0.14 
  -8  -4   2    1.08    0.11 
  -8   4   2    1.19    0.10 
  -8   4   2    1.02    0.11 
   8   4  -2    1.06    0.09 
   8   4  -2    1.12    0.10 
  -6  -4   2    1.93    0.17 
   6  -4  -2    2.17    0.17 
  -6  -4   2    1.92    0.15 
  -6  -4   2    1.88    0.18 
  -6  -4   2    2.19    0.18 
   6  -4  -2    1.85    0.16 
  -6   4   2    2.01    0.13 
   6   4  -2    1.91    0.15 
   6   4  -2    1.67    0.13 
  -6   4   2    1.78    0.14 
   4  -4  -2    0.47    0.08 
   4  -4  -2    0.63    0.08 
  -4  -4   2    0.55    0.09 
  -4  -4   2    0.64    0.09 
   4  -4  -2    0.59    0.08 
  -4  -4   2    0.52    0.07 
  -4  -4   2    0.62    0.09 
   4   4  -2    0.48    0.06 
  -4   4   2    0.58    0.07 
  -4   4   2    0.64    0.05 
   4   4  -2    0.67    0.07 
  -2  -4   2    0.79    0.08 
   2  -4  -2    0.79    0.10 
  -2  -4   2    0.75    0.09 
   2  -4  -2    0.84    0.10 
  -2  -4   2    0.83    0.10 
  -2  -4   2    0.78    0.11 
   2  -4  -2    0.89    0.09 
   2   4  -2    0.73    0.07 
   2   4  -2    0.96    0.09 
   2   4  -2    0.82    0.10 
   0  -4   2   65.69    3.68 
   0  -4  -2   63.53    3.66 
   0  -4   2   61.10    3.66 
   0  -4  -2   59.94    3.66 
   0  -4  -2   61.66    3.64 
   0   4  -2   55.91    3.61 
   0   4  -2   63.06    3.63 
   0   4  -2   64.65    3.67 
   2  -4   2   85.03    4.95 
  -2  -4  -2   82.15    4.94 
  -2  -4  -2   84.84    4.98 
   2  -4   2   88.80    4.98 
  -2  -4  -2   88.75    4.98 
  -2   4  -2   86.65    4.98 
  -2   4  -2   75.17    4.92 
  -2   4  -2   85.00    4.94 
  -4  -4  -2   33.67    1.95 
  -4  -4  -2   31.62    1.91 
   4  -4   2   32.57    1.95 
   4  -4   2   33.57    1.92 
  -4  -4  -2   32.91    1.96 
   4   4   2   30.41    1.91 
  -4   4  -2   30.05    1.90 
   4   4   2   32.97    1.89 
  -4   4  -2   31.66    1.95 
  -4   4  -2   33.20    1.92 
  -6  -4  -2    8.41    0.58 
  -6  -4  -2    8.30    0.58 
   6  -4   2    8.66    0.58 
   6   4   2    8.36    0.51 
  -6   4  -2    8.81    0.58 
  -6   4  -2    8.30    0.54 
   6   4   2    8.40    0.54 
  -6   4  -2    8.00    0.52 
  -8  -4  -2    1.35    0.16 
  -8  -4  -2    1.28    0.16 
   8  -4   2    1.31    0.16 
  -8   4  -2    1.59    0.18 
   8   4   2    1.61    0.12 
   8   4   2    1.56    0.14 
  -8   4  -2    1.39    0.14 
  -8   4  -2    1.48    0.12 
  10  -4   2    0.18    0.08 
 -10  -4  -2    0.11    0.08 
 -10  -4  -2    0.35    0.11 
 -10   4  -2    0.10    0.07 
 -10   4  -2    0.17    0.08 
  10   4   2    0.05    0.05 
  10   4   2    0.07    0.04 
  10   4   2    0.07    0.04 
 -10   4  -2    0.19    0.05 
  12  -4   2   12.51    0.91 
 -12  -4  -2   13.05    0.89 
 -12  -4  -2   13.54    0.90 
  12   4   2   13.41    0.86 
  12   4   2   14.10    0.83 
 -12   4  -2   14.15    0.94 
 -12   4  -2   13.50    0.87 
  12   4   2   12.72    0.83 
 -12   4  -2   13.98    0.82 
 -14  -4  -2    7.71    0.59 
  14  -4   2    6.97    0.61 
 -14  -4  -2    7.95    0.60 
  14   4   2    8.30    0.57 
  14   4   2    8.78    0.54 
 -14   4  -2    9.08    0.53 
 -14   4  -2    8.40    0.65 
  14   4   2    7.44    0.53 
  14   4   2    8.67    0.55 
 -14   4  -2    8.79    0.58 
 -16  -4  -2    7.75    0.63 
  16  -4   2    7.18    0.66 
 -16   4  -2   10.49    0.63 
  16   4   2    9.06    0.62 
  16   4   2    9.19    0.59 
  16   4   2    9.50    0.55 
  16   4   2    8.76    0.58 
 -16   4  -2    7.79    0.68 
 -16   4  -2    9.33    0.56 
  18  -4   2    3.61    0.38 
  18   4   2    4.32    0.27 
  18   4   2    3.37    0.31 
  18   4   2    3.99    0.33 
 -18   4  -2    3.79    0.27 
  18   4   2    4.21    0.32 
 -18   4  -2    3.29    0.38 
 -18   4  -2    4.48    0.34 
 -20  -4  -2    0.27    0.08 
  20  -4   2    0.28    0.08 
 -20  -4  -2    0.30    0.08 
  20  -4   2    0.30    0.08 
 -20  -4  -2    0.18    0.07 
 -20  -4  -2    0.44    0.10 
  20   4   2    0.26    0.10 
  20   4   2    0.26    0.07 
 -20   4  -2    0.52    0.12 
 -20   4  -2    0.32    0.06 
  20   4   2    0.41    0.08 
 -20   4  -2    0.34    0.07 
  20   4   2    0.28    0.05 
 -22  -4  -2    3.74    0.26 
 -22  -4  -2    3.54    0.25 
  22  -4   2    3.40    0.26 
  22  -4   2    3.64    0.27 
 -22   4  -2    3.59    0.24 
 -22   4  -2    3.50    0.24 
  22   4   2    3.58    0.26 
  22   4   2    2.96    0.24 
  22   4   2    3.49    0.23 
 -22   4  -2    2.81    0.26 
 -24  -4  -2    0.03    0.05 
  24  -4   2    0.03    0.05 
  24  -4   2    0.07    0.06 
 -24  -4  -2    0.02    0.05 
 -24  -4  -2    0.02    0.05 
 -24   4  -2    0.02    0.05 
  24   4   2    0.06    0.06 
  24   4   2    0.05    0.03 
 -24   4  -2    0.08    0.05 
 -26  -4  -2    1.11    0.11 
  26  -4   2    1.17    0.13 
 -26  -4  -2    1.26    0.13 
  26  -4   2    1.15    0.13 
 -26   4  -2    0.94    0.11 
 -26   4  -2    1.12    0.11 
  26   4   2    1.13    0.13 
  28  -4   2    0.62    0.09 
 -28  -4  -2    0.64    0.08 
 -28  -4  -2    0.53    0.07 
  28  -4   2    0.47    0.08 
  28   4   2    0.64    0.09 
 -28   4  -2    0.60    0.08 
 -28   4  -2    0.59    0.07 
 -30   4  -2    0.31    0.05 
  31  -5  -2    0.01    0.04 
 -31  -5   2    0.02    0.03 
 -31  -5   2    0.03    0.04 
  31  -5  -2    0.04    0.04 
 -31   5   2    0.06    0.03 
 -31   5   2    0.04    0.04 
  31   5  -2   -0.01    0.04 
 -29  -5   2    0.54    0.08 
  29  -5  -2    0.48    0.08 
 -29  -5   2    0.48    0.07 
  29  -5  -2    0.61    0.10 
 -29   5   2    0.66    0.07 
  29   5  -2    0.68    0.10 
 -29   5   2    0.75    0.09 
  27  -5  -2    0.20    0.07 
  27  -5  -2    0.24    0.07 
 -27  -5   2    0.21    0.06 
 -27  -5   2    0.14    0.06 
  27   5  -2    0.16    0.08 
 -27   5   2    0.24    0.05 
 -27   5   2    0.18    0.07 
 -27   5   2    0.25    0.06 
  27   5  -2    0.26    0.08 
 -25  -5   2    0.11    0.07 
  25  -5  -2    0.12    0.06 
  25  -5  -2    0.11    0.07 
 -25  -5   2    0.18    0.07 
 -25   5   2    0.17    0.04 
  25   5  -2    0.25    0.08 
  25   5  -2    0.13    0.06 
 -25   5   2    0.26    0.06 
 -25   5   2    0.22    0.05 
  23  -5  -2    3.99    0.30 
  23  -5  -2    4.34    0.29 
 -23  -5   2    4.27    0.29 
 -23  -5   2    4.16    0.30 
  23   5  -2    3.31    0.30 
  23   5  -2    4.01    0.30 
 -23   5   2    3.80    0.25 
  23   5  -2    3.62    0.25 
 -23   5   2    3.47    0.25 
 -23   5   2    3.65    0.27 
 -21  -5   2    9.66    0.63 
 -21  -5   2   10.14    0.64 
  21  -5  -2    9.78    0.63 
  21  -5  -2    9.94    0.65 
 -21   5   2   10.04    0.60 
 -21   5   2    8.62    0.60 
  21   5  -2   10.05    0.65 
 -21   5   2   10.63    0.61 
  21   5  -2   10.13    0.60 
 -19  -5   2    2.03    0.25 
 -19  -5   2    2.01    0.22 
  19   5  -2    2.37    0.24 
  19   5  -2    2.50    0.19 
  19   5  -2    2.37    0.18 
 -19   5   2    2.56    0.22 
 -19   5   2    2.72    0.18 
 -19   5   2    2.25    0.26 
  17  -5  -2    2.52    0.24 
 -17  -5   2    2.70    0.22 
 -17  -5   2    2.72    0.26 
  17   5  -2    2.22    0.18 
 -17   5   2    2.26    0.17 
 -17   5   2    2.40    0.21 
 -17   5   2    2.15    0.25 
  17   5  -2    2.36    0.23 
 -17   5   2    2.08    0.21 
  17   5  -2    2.27    0.18 
 -15  -5   2    6.87    0.49 
 -15  -5   2    6.41    0.48 
 -15  -5   2    6.47    0.44 
  15  -5  -2    7.00    0.48 
 -15   5   2    6.11    0.48 
 -15   5   2    6.08    0.42 
  15   5  -2    5.94    0.45 
  15   5  -2    6.05    0.40 
 -15   5   2    5.42    0.41 
  15   5  -2    6.42    0.45 
  15   5  -2    6.23    0.41 
  13  -5  -2    2.51    0.26 
 -13  -5   2    2.73    0.28 
 -13  -5   2    2.71    0.24 
 -13  -5   2    2.71    0.27 
  13   5  -2    3.35    0.25 
  13   5  -2    3.15    0.26 
 -13   5   2    3.24    0.22 
  13   5  -2    3.01    0.21 
  13   5  -2    3.15    0.23 
 -13   5   2    3.37    0.28 
  11  -5  -2    7.67    0.56 
 -11  -5   2    8.79    0.58 
 -11  -5   2    8.03    0.57 
 -11  -5   2    8.22    0.53 
 -11   5   2    7.29    0.50 
 -11   5   2    8.19    0.52 
 -11   5   2    7.94    0.54 
  11   5  -2    8.40    0.53 
  11   5  -2    7.78    0.51 
  11   5  -2    7.62    0.54 
  -9  -5   2    6.74    0.47 
  -9  -5   2    7.21    0.44 
  -9  -5   2    6.33    0.47 
   9  -5  -2    6.15    0.45 
  -9   5   2    6.19    0.43 
   9   5  -2    6.46    0.43 
   9   5  -2    6.17    0.41 
  -9   5   2    6.07    0.41 
   9   5  -2    5.88    0.43 
   7  -5  -2    9.69    0.64 
  -7  -5   2    9.68    0.65 
  -7  -5   2    9.64    0.61 
  -7  -5   2    9.95    0.66 
   7   5  -2    9.25    0.60 
  -7   5   2    9.42    0.59 
  -5  -5   2    0.51    0.07 
   5  -5  -2    0.54    0.09 
  -5  -5   2    0.45    0.09 
  -5  -5   2    0.51    0.10 
  -3  -5   2   14.15    0.90 
   3  -5  -2   14.22    0.88 
  -3  -5   2   13.36    0.88 
   3  -5  -2   15.50    0.88 
   3  -5  -2   12.57    0.88 
   1  -5  -2   22.01    1.41 
  -1  -5   2   23.64    1.43 
   1  -5  -2   23.09    1.39 
   1  -5  -2   22.77    1.40 
   1   5  -2   23.00    1.37 
   1   5  -2   22.98    1.41 
  -1  -5  -2   62.48    3.62 
  -1  -5  -2   60.73    3.65 
  -1  -5  -2   62.75    3.64 
   1  -5   2   62.43    3.66 
  -1   5  -2   59.60    3.64 
  -1   5  -2   60.03    3.60 
   3  -5   2    7.70    0.49 
   3  -5   2    8.49    0.53 
  -3  -5  -2    7.35    0.48 
  -3  -5  -2    7.82    0.52 
  -3  -5  -2    8.35    0.54 
   3  -5   2    6.28    0.50 
   3   5   2    6.69    0.44 
   3   5   2    6.82    0.48 
  -3   5  -2    7.75    0.52 
  -3   5  -2    6.64    0.47 
  -5  -5  -2    0.27    0.09 
  -5  -5  -2    0.34    0.11 
   5  -5   2    0.35    0.09 
   5  -5   2    0.33    0.10 
   5   5   2    0.21    0.04 
  -5   5  -2    0.22    0.08 
  -5   5  -2    0.21    0.05 
   5   5   2    0.21    0.06 
  -5   5  -2    0.21    0.06 
  -7  -5  -2    4.64    0.37 
  -7  -5  -2    4.30    0.37 
   7  -5   2    4.38    0.36 
  -7   5  -2    4.67    0.37 
  -7   5  -2    4.46    0.32 
   7   5   2    4.92    0.30 
   7   5   2    4.69    0.33 
  -7   5  -2    4.25    0.31 
  -7   5  -2    4.42    0.30 
  -9  -5  -2    1.09    0.16 
  -9  -5  -2    1.11    0.17 
   9   5   2    1.79    0.16 
  -9   5  -2    1.64    0.19 
  -9   5  -2    1.62    0.13 
  -9   5  -2    1.41    0.14 
   9   5   2    1.65    0.13 
   9   5   2    1.35    0.12 
 -11  -5  -2    6.40    0.47 
 -11  -5  -2    5.70    0.47 
  11  -5   2    5.58    0.47 
 -11   5  -2    6.10    0.49 
  11   5   2    5.84    0.42 
 -11   5  -2    5.95    0.39 
  11   5   2    6.11    0.39 
  11   5   2    5.69    0.39 
 -13  -5  -2   20.65    1.27 
 -13  -5  -2   19.68    1.25 
  13  -5   2   18.51    1.28 
  13   5   2   18.72    1.21 
  13   5   2   20.39    1.17 
 -13   5  -2   20.54    1.16 
 -13   5  -2   19.01    1.18 
 -13   5  -2   18.26    1.29 
  13   5   2   16.58    1.14 
  13   5   2   19.72    1.18 
  15  -5   2   17.98    1.25 
 -15  -5  -2   17.68    1.21 
 -15  -5  -2   18.86    1.20 
  15   5   2   17.84    1.16 
  15   5   2   20.22    1.14 
 -15   5  -2   16.26    1.24 
  15   5   2   17.67    1.09 
 -15   5  -2   18.10    1.16 
 -15   5  -2   19.38    1.11 
  15   5   2   17.88    1.12 
 -17  -5  -2    4.36    0.33 
  17  -5   2    3.39    0.37 
 -17  -5  -2    3.89    0.29 
 -17  -5  -2    3.36    0.34 
 -17   5  -2    3.82    0.28 
 -17   5  -2    3.60    0.28 
  17   5   2    3.48    0.24 
  17   5   2    3.19    0.28 
 -17   5  -2    3.18    0.25 
  17   5   2    3.59    0.29 
  17   5   2    3.49    0.31 
 -17   5  -2    3.54    0.31 
 -19  -5  -2    3.77    0.29 
 -19  -5  -2    3.26    0.28 
  19  -5   2    3.83    0.30 
 -19  -5  -2    3.55    0.31 
 -19  -5  -2    3.57    0.28 
 -19  -5  -2    3.37    0.29 
  19   5   2    4.12    0.26 
 -19   5  -2    4.19    0.27 
 -19   5  -2    4.06    0.26 
  19   5   2    4.18    0.32 
  19   5   2    4.56    0.28 
  19   5   2    3.45    0.28 
 -19   5  -2    4.25    0.34 
  21  -5   2    1.33    0.16 
 -21  -5  -2    1.32    0.15 
 -21  -5  -2    1.62    0.19 
 -21  -5  -2    1.45    0.15 
 -21  -5  -2    1.54    0.16 
  21   5   2    1.70    0.14 
 -21   5  -2    1.47    0.13 
  21   5   2    1.28    0.18 
  21   5   2    1.41    0.15 
 -21   5  -2    1.45    0.17 
 -21   5  -2    1.52    0.14 
  21   5   2    1.47    0.12 
 -23  -5  -2    1.61    0.16 
  23  -5   2    1.49    0.16 
 -23  -5  -2    1.50    0.15 
 -23  -5  -2    1.61    0.16 
  23  -5   2    1.55    0.17 
  23   5   2    1.61    0.16 
 -23   5  -2    1.84    0.14 
 -23   5  -2    1.72    0.14 
  23   5   2    1.77    0.13 
  23   5   2    1.59    0.14 
 -25  -5  -2    1.87    0.17 
  25  -5   2    2.04    0.17 
 -25  -5  -2    2.21    0.18 
  25  -5   2    2.04    0.18 
 -25  -5  -2    1.89    0.16 
  25   5   2    2.06    0.17 
  25   5   2    2.03    0.14 
 -25   5  -2    2.13    0.16 
 -25   5  -2    2.24    0.16 
 -27  -5  -2    1.49    0.13 
  27  -5   2    1.33    0.12 
  27  -5   2    1.36    0.13 
 -27  -5  -2    1.27    0.11 
  27   5   2    1.38    0.13 
 -27   5  -2    1.44    0.11 
 -27   5  -2    1.36    0.11 
  29  -5   2    0.47    0.07 
 -29  -5  -2    0.39    0.06 
 -29   5  -2    0.50    0.06 
  29   5   2    0.56    0.07 
 -30  -6   2    0.65    0.08 
  30  -6  -2    0.60    0.08 
 -30  -6   2    0.65    0.08 
 -30  -6   2    0.71    0.08 
 -30   6   2    0.73    0.08 
  30   6  -2    0.68    0.09 
  28  -6  -2    0.88    0.12 
 -28  -6   2    1.03    0.11 
 -28  -6   2    0.95    0.11 
  28  -6  -2    0.93    0.10 
 -28   6   2    1.14    0.11 
  28   6  -2    1.01    0.11 
 -28   6   2    1.09    0.09 
  28   6  -2    1.30    0.13 
  26  -6  -2    0.12    0.06 
 -26  -6   2    0.16    0.07 
 -26  -6   2    0.16    0.06 
  26  -6  -2    0.18    0.07 
 -26   6   2    0.10    0.04 
 -26   6   2    0.17    0.05 
 -26   6   2    0.22    0.06 
  26   6  -2    0.14    0.06 
  26   6  -2    0.15    0.07 
  24  -6  -2    0.90    0.12 
 -24  -6   2    0.80    0.12 
 -24  -6   2    1.01    0.13 
  24  -6  -2    0.89    0.14 
 -24   6   2    0.96    0.11 
  24   6  -2    0.87    0.09 
 -24   6   2    0.87    0.10 
 -24   6   2    1.02    0.09 
  24   6  -2    1.10    0.14 
 -22  -6   2    2.70    0.22 
 -22  -6   2    2.34    0.20 
  22  -6  -2    2.84    0.23 
  22  -6  -2    2.14    0.19 
 -22   6   2    2.18    0.16 
 -22   6   2    1.92    0.17 
 -22   6   2    2.37    0.17 
  22   6  -2    2.26    0.16 
  22   6  -2    2.05    0.21 
  20  -6  -2    0.50    0.09 
  20  -6  -2    0.59    0.09 
 -20  -6   2    0.66    0.11 
 -20  -6   2    0.56    0.11 
  20  -6  -2    0.65    0.12 
 -20   6   2    0.55    0.07 
  20   6  -2    0.42    0.10 
  20   6  -2    0.52    0.08 
 -20   6   2    0.55    0.08 
 -20   6   2    0.32    0.07 
  20   6  -2    0.48    0.06 
 -20   6   2    0.44    0.10 
 -18  -6   2    4.15    0.33 
  18  -6  -2    3.77    0.35 
 -18  -6   2    3.96    0.37 
 -18  -6   2    3.89    0.32 
 -18   6   2    4.76    0.28 
  18   6  -2    4.71    0.29 
 -18   6   2    3.62    0.45 
  18   6  -2    3.92    0.34 
 -18   6   2    3.99    0.32 
  16  -6  -2    1.29    0.18 
 -16  -6   2    1.17    0.19 
 -16  -6   2    1.27    0.19 
 -16  -6   2    1.20    0.16 
 -16   6   2    1.65    0.12 
  16   6  -2    1.67    0.19 
 -16   6   2    1.68    0.16 
 -16   6   2    1.33    0.19 
  16   6  -2    1.62    0.14 
  16   6  -2    1.58    0.18 
  16   6  -2    1.34    0.13 
 -16   6   2    1.49    0.16 
 -14  -6   2    0.32    0.09 
  14  -6  -2    0.38    0.13 
 -14  -6   2    0.32    0.12 
 -14  -6   2    0.29    0.11 
  14   6  -2    0.12    0.07 
 -14   6   2    0.09    0.03 
  14   6  -2    0.14    0.05 
 -14   6   2    0.22    0.06 
 -14   6   2    0.12    0.06 
  14   6  -2    0.15    0.06 
 -14   6   2    0.11    0.13 
  14   6  -2    0.17    0.07 
 -12  -6   2    3.89    0.35 
 -12  -6   2    3.88    0.35 
 -12  -6   2    3.71    0.30 
  12  -6  -2    3.45    0.33 
  12   6  -2    3.95    0.29 
 -12   6   2    4.04    0.29 
  12   6  -2    4.27    0.31 
 -12   6   2    4.20    0.28 
  12   6  -2    4.08    0.32 
 -10  -6   2   30.33    1.87 
  10  -6  -2   29.84    1.86 
 -10  -6   2   30.36    1.82 
 -10  -6   2   31.73    1.88 
  10   6  -2   29.67    1.82 
  10   6  -2   30.74    1.82 
  10   6  -2   30.50    1.79 
 -10   6   2   27.03    1.77 
  -8  -6   2   33.17    2.03 
  -8  -6   2   33.00    1.98 
  -8  -6   2   32.44    2.03 
   8  -6  -2   34.47    2.02 
   8   6  -2   33.33    1.96 
   8   6  -2   31.17    1.98 
  -6  -6   2    1.30    0.17 
  -6  -6   2    1.22    0.13 
  -6  -6   2    1.35    0.16 
   6   6  -2    0.91    0.12 
   6   6  -2    1.14    0.11 
  -4  -6   2    0.26    0.11 
   4  -6  -2    0.19    0.08 
   4   6  -2    0.16    0.06 
   4   6  -2    0.17    0.05 
   2  -6  -2   10.82    0.67 
   2  -6  -2    9.29    0.67 
  -2  -6   2   10.60    0.70 
   2  -6  -2    9.95    0.67 
   2   6  -2    9.57    0.64 
   2   6  -2   10.25    0.64 
   0  -6   2   23.48    1.52 
   0  -6  -2   23.27    1.50 
   0  -6  -2   24.88    1.48 
   0  -6  -2   24.25    1.49 
   0   6  -2   23.23    1.45 
   0   6  -2   23.48    1.45 
   0   6  -2   26.15    1.50 
  -2  -6  -2   62.37    3.53 
   2  -6   2   58.22    3.54 
  -2  -6  -2   58.98    3.54 
  -2  -6  -2   60.03    3.49 
  -2   6  -2   59.34    3.52 
  -2   6  -2   55.37    3.47 
  -2   6  -2   58.62    3.48 
   4  -6   2   20.33    1.22 
  -4  -6  -2   20.69    1.25 
  -4  -6  -2   18.83    1.20 
  -4  -6  -2   20.50    1.26 
  -4   6  -2   19.64    1.24 
  -4   6  -2   17.74    1.18 
   4   6   2   18.55    1.19 
   4   6   2   20.09    1.15 
  -4   6  -2   18.89    1.19 
   6  -6   2   37.56    2.39 
  -6  -6  -2   40.67    2.45 
  -6  -6  -2   42.42    2.45 
  -6   6  -2   39.57    2.38 
  -6   6  -2   40.94    2.44 
   6   6   2   39.40    2.39 
   6   6   2   41.04    2.34 
  -6   6  -2   37.47    2.37 
   8  -6   2   11.11    0.76 
  -8  -6  -2   11.32    0.77 
  -8  -6  -2   11.40    0.77 
   8   6   2   10.55    0.70 
  -8   6  -2   11.04    0.76 
  -8   6  -2    9.98    0.70 
  -8   6  -2    9.99    0.68 
   8   6   2   11.02    0.66 
  -8   6  -2   10.65    0.68 
  10  -6   2    0.50    0.13 
 -10  -6  -2    0.58    0.13 
 -10  -6  -2    0.62    0.13 
 -10   6  -2    0.37    0.06 
 -10   6  -2    0.41    0.08 
  10   6   2    0.30    0.09 
  10   6   2    0.30    0.07 
  10   6   2    0.29    0.06 
 -10   6  -2    0.34    0.13 
 -10   6  -2    0.34    0.08 
 -12  -6  -2    2.20    0.25 
  12  -6   2    2.10    0.26 
 -12  -6  -2    2.29    0.26 
 -12   6  -2    2.05    0.17 
 -12   6  -2    2.15    0.26 
  12   6   2    2.05    0.17 
  12   6   2    2.11    0.18 
  12   6   2    1.95    0.21 
 -12   6  -2    1.94    0.15 
 -14  -6  -2    2.97    0.31 
  14  -6   2    2.82    0.32 
 -14  -6  -2    2.97    0.31 
 -14   6  -2    2.88    0.22 
  14   6   2    3.16    0.24 
 -14   6  -2    2.54    0.32 
  14   6   2    2.89    0.20 
  14   6   2    2.57    0.26 
  14   6   2    3.14    0.23 
 -14   6  -2    2.98    0.22 
 -16  -6  -2    1.30    0.15 
 -16  -6  -2    1.28    0.15 
  16  -6   2    1.40    0.15 
 -16  -6  -2    1.34    0.16 
 -16  -6  -2    1.49    0.16 
  16   6   2    1.52    0.16 
  16   6   2    1.45    0.13 
 -16   6  -2    1.27    0.19 
 -16   6  -2    1.45    0.11 
 -16   6  -2    1.43    0.13 
  18  -6   2    6.00    0.37 
 -18  -6  -2    5.46    0.40 
 -18  -6  -2    6.04    0.38 
 -18  -6  -2    5.57    0.37 
 -18  -6  -2    5.71    0.38 
  18   6   2    4.65    0.33 
 -18   6  -2    5.17    0.34 
 -18   6  -2    4.89    0.34 
  18   6   2    5.11    0.34 
  18   6   2    5.18    0.39 
 -18   6  -2    4.26    0.40 
 -20  -6  -2    5.55    0.42 
 -20  -6  -2    5.99    0.39 
 -20  -6  -2    6.03    0.40 
 -20  -6  -2    5.92    0.40 
  20  -6   2    5.89    0.39 
  20   6   2    5.58    0.36 
 -20   6  -2    5.78    0.36 
 -20   6  -2    5.60    0.37 
  20   6   2    5.65    0.37 
  20   6   2    5.09    0.42 
 -22  -6  -2    0.67    0.11 
 -22  -6  -2    0.77    0.11 
 -22  -6  -2    0.88    0.12 
  22  -6   2    0.98    0.13 
 -22   6  -2    1.14    0.11 
  22   6   2    1.30    0.10 
  22   6   2    1.21    0.13 
 -22   6  -2    1.07    0.11 
  22   6   2    1.06    0.11 
 -24  -6  -2    1.24    0.13 
 -24  -6  -2    1.01    0.16 
 -24  -6  -2    1.23    0.13 
 -24  -6  -2    1.18    0.12 
  24  -6   2    1.31    0.13 
  24   6   2    1.27    0.10 
  24   6   2    1.21    0.13 
 -24   6  -2    1.32    0.11 
 -24   6  -2    1.22    0.11 
 -26  -6  -2    0.97    0.11 
 -26  -6  -2    0.98    0.10 
 -26  -6  -2    1.11    0.10 
  26  -6   2    1.19    0.11 
 -26   6  -2    0.99    0.09 
  26   6   2    1.10    0.11 
  26   6   2    1.00    0.08 
 -26   6  -2    1.21    0.10 
  28  -6   2    1.07    0.10 
 -28  -6  -2    1.05    0.10 
 -28   6  -2    1.06    0.08 
  28   6   2    0.90    0.10 
  29  -7  -2    0.03    0.04 
 -29  -7   2    0.07    0.03 
 -29  -7   2    0.06    0.04 
  29   7  -2    0.02    0.04 
 -29   7   2    0.03    0.03 
  29   7  -2    0.06    0.04 
 -27  -7   2    0.26    0.06 
 -27  -7   2    0.29    0.06 
  27  -7  -2    0.28    0.07 
 -27   7   2    0.23    0.05 
 -27   7   2    0.21    0.04 
  27   7  -2    0.20    0.06 
  27   7  -2    0.28    0.07 
 -25  -7   2    1.10    0.12 
  25  -7  -2    0.95    0.13 
 -25  -7   2    1.23    0.12 
 -25  -7   2    1.00    0.13 
 -25   7   2    0.95    0.10 
  25   7  -2    1.07    0.13 
  25   7  -2    0.96    0.12 
 -25   7   2    0.92    0.08 
 -25   7   2    0.93    0.09 
  23  -7  -2    0.71    0.12 
 -23  -7   2    0.65    0.10 
 -23  -7   2    0.79    0.12 
 -23   7   2    0.83    0.08 
  23   7  -2    0.68    0.11 
 -23   7   2    0.86    0.09 
  23   7  -2    0.88    0.08 
  23   7  -2    0.96    0.12 
 -21  -7   2    0.47    0.10 
  21  -7  -2    0.37    0.08 
 -21  -7   2    0.35    0.09 
  21  -7  -2    0.41    0.12 
 -21   7   2    0.52    0.08 
 -21   7   2    0.46    0.07 
  21   7  -2    0.35    0.08 
 -21   7   2    0.60    0.07 
  21   7  -2    0.56    0.11 
  21   7  -2    0.52    0.07 
 -21   7   2    0.43    0.09 
 -19  -7   2    2.38    0.24 
 -19  -7   2    1.90    0.20 
  19  -7  -2    2.21    0.19 
 -19  -7   2    2.18    0.20 
 -19   7   2    2.28    0.21 
  19   7  -2    2.14    0.16 
 -19   7   2    2.18    0.17 
  19   7  -2    2.10    0.20 
 -19   7   2    1.86    0.16 
 -17  -7   2    4.33    0.33 
  17  -7  -2    4.05    0.37 
 -17  -7   2    4.23    0.34 
  17  -7  -2    4.43    0.33 
 -17  -7   2    4.01    0.33 
 -17   7   2    5.41    0.36 
  17   7  -2    4.78    0.30 
 -17   7   2    4.99    0.31 
  17   7  -2    4.54    0.34 
  17   7  -2    5.00    0.32 
  17   7  -2    4.63    0.38 
 -15  -7   2    9.01    0.68 
 -15  -7   2    7.74    0.66 
 -15  -7   2    8.29    0.61 
 -15   7   2    8.68    0.60 
  15   7  -2    9.92    0.57 
  15   7  -2    8.03    0.61 
  15   7  -2    7.99    0.59 
  15   7  -2    9.63    0.64 
 -15   7   2   10.08    0.59 
 -15   7   2    9.25    0.55 
 -13  -7   2    2.04    0.25 
 -13  -7   2    1.97    0.20 
  13  -7  -2    1.86    0.23 
 -13  -7   2    1.81    0.24 
  13   7  -2    2.20    0.22 
  13   7  -2    1.85    0.20 
  13   7  -2    2.03    0.18 
  13   7  -2    2.25    0.17 
 -13   7   2    2.06    0.19 
 -13   7   2    1.93    0.14 
 -13   7   2    2.13    0.18 
 -11  -7   2    5.70    0.42 
 -11  -7   2    6.14    0.48 
 -11  -7   2    5.81    0.47 
  11  -7  -2    4.71    0.44 
  11   7  -2    5.60    0.42 
  11   7  -2    5.56    0.39 
  11   7  -2    5.97    0.43 
 -11   7   2    5.78    0.37 
 -11   7   2    5.51    0.39 
  11   7  -2    5.48    0.37 
  -9  -7   2    0.32    0.12 
  -9  -7   2    0.28    0.12 
   9  -7  -2    0.31    0.12 
  -9  -7   2    0.33    0.13 
   9   7  -2    0.45    0.07 
   9   7  -2    0.42    0.10 
   9   7  -2    0.48    0.10 
  -9   7   2    0.43    0.07 
   9   7  -2    0.50    0.08 
  -9   7   2    0.44    0.07 
   7  -7  -2   18.06    1.10 
  -7  -7   2   16.38    1.09 
  -7  -7   2   17.38    1.12 
   7   7  -2   15.79    1.04 
   7   7  -2   16.47    1.02 
  -7   7   2   16.05    1.01 
   5  -7  -2   23.53    1.42 
  -5  -7   2   23.20    1.46 
  -5   7   2   21.08    1.33 
   5   7  -2   22.54    1.36 
   5   7  -2   22.05    1.37 
  -3  -7   2   47.51    2.86 
   3  -7  -2   47.61    2.81 
   3   7  -2   44.47    2.78 
   3   7  -2   47.40    2.77 
   1  -7  -2   37.09    2.18 
   1  -7  -2   32.80    2.20 
  -1  -7   2   37.52    2.24 
   1   7  -2   35.88    2.15 
   1   7  -2   36.46    2.15 
  -1  -7  -2   17.56    1.21 
   1  -7   2   18.74    1.24 
  -1  -7  -2   19.47    1.19 
  -1  -7  -2   18.81    1.23 
  -1   7  -2   19.24    1.17 
  -1   7  -2   19.73    1.17 
  -3  -7  -2    4.31    0.38 
  -3  -7  -2    4.22    0.33 
  -3  -7  -2    4.30    0.36 
  -3   7  -2    4.31    0.35 
  -3   7  -2    4.19    0.31 
   3   7   2    4.16    0.33 
  -3   7  -2    4.61    0.32 
  -5  -7  -2    4.48    0.40 
  -5  -7  -2    5.04    0.42 
   5  -7   2    4.48    0.37 
  -5   7  -2    4.99    0.35 
   5   7   2    4.71    0.36 
  -5   7  -2    4.74    0.34 
  -5   7  -2    4.47    0.31 
  -5   7  -2    4.90    0.39 
   5   7   2    4.97    0.30 
  -7  -7  -2    2.60    0.28 
  -7  -7  -2    2.67    0.28 
  -7   7  -2    2.60    0.18 
   7   7   2    2.59    0.23 
   7   7   2    2.66    0.19 
  -7   7  -2    2.63    0.27 
  -7   7  -2    2.35    0.22 
  -7   7  -2    2.75    0.22 
  -9  -7  -2    4.10    0.39 
  -9  -7  -2    4.16    0.39 
   9   7   2    4.19    0.29 
   9   7   2    4.56    0.29 
  -9   7  -2    4.35    0.28 
  -9   7  -2    4.45    0.32 
  -9   7  -2    4.16    0.38 
  -9   7  -2    4.02    0.33 
   9   7   2    4.08    0.34 
 -11  -7  -2    3.97    0.39 
 -11  -7  -2    3.93    0.38 
 -11   7  -2    4.04    0.30 
 -11   7  -2    4.18    0.31 
  11   7   2    4.20    0.29 
 -11   7  -2    4.48    0.28 
 -11   7  -2    3.89    0.39 
  11   7   2    4.32    0.30 
  11   7   2    3.86    0.33 
  13  -7   2    1.20    0.16 
  13  -7   2    1.22    0.15 
 -13  -7  -2    1.27    0.20 
 -13  -7  -2    1.03    0.22 
 -13  -7  -2    1.18    0.16 
 -13  -7  -2    1.06    0.14 
 -13  -7  -2    0.95    0.15 
  13  -7   2    1.19    0.31 
 -13  -7  -2    1.11    0.21 
  13   7   2    1.55    0.12 
 -13   7  -2    1.51    0.11 
  13   7   2    1.55    0.20 
  13   7   2    1.66    0.16 
 -13   7  -2    1.61    0.15 
 -13   7  -2    1.55    0.13 
 -13   7  -2    1.65    0.13 
 -15  -7  -2    2.38    0.23 
  15  -7   2    2.51    0.23 
 -15  -7  -2    2.87    0.27 
 -15  -7  -2    2.47    0.23 
 -15  -7  -2    2.46    0.24 
  15  -7   2    2.35    0.22 
 -15   7  -2    2.90    0.20 
  15   7   2    2.98    0.20 
  15   7   2    3.16    0.25 
 -15   7  -2    2.92    0.19 
 -17  -7  -2    7.20    0.52 
  17  -7   2    7.97    0.48 
  17  -7   2    6.86    0.48 
 -17  -7  -2    8.25    0.50 
 -17  -7  -2    7.30    0.49 
 -17  -7  -2    7.03    0.48 
 -17   7  -2    6.88    0.45 
 -17   7  -2    6.57    0.44 
  17   7   2    6.90    0.45 
 -17   7  -2    6.97    0.46 
  17   7   2    7.27    0.50 
 -19  -7  -2    2.32    0.23 
 -19  -7  -2    2.66    0.21 
  19  -7   2    2.32    0.20 
 -19  -7  -2    2.37    0.20 
 -19  -7  -2    2.40    0.21 
  19   7   2    2.12    0.16 
  19   7   2    2.08    0.17 
 -19   7  -2    2.19    0.17 
  19   7   2    2.08    0.21 
 -19   7  -2    2.25    0.17 
 -21  -7  -2    0.09    0.06 
 -21  -7  -2    0.15    0.08 
  21  -7   2    0.12    0.06 
 -21  -7  -2    0.08    0.06 
 -21  -7  -2    0.07    0.06 
 -21   7  -2   -0.06    0.04 
  21   7   2    0.01    0.03 
 -21   7  -2    0.03    0.04 
  21   7   2    0.04    0.06 
  21   7   2    0.02    0.04 
 -23  -7  -2    0.20    0.06 
 -23  -7  -2    0.26    0.08 
  23  -7   2    0.23    0.06 
 -23  -7  -2    0.18    0.06 
 -23  -7  -2    0.20    0.07 
 -23   7  -2    0.11    0.04 
 -23   7  -2    0.11    0.04 
  23   7   2    0.13    0.05 
 -25  -7  -2    0.36    0.06 
  25  -7   2    0.42    0.07 
 -25  -7  -2    0.35    0.06 
 -25  -7  -2    0.38    0.07 
 -25  -7  -2    0.37    0.11 
 -25   7  -2    0.35    0.05 
  25   7   2    0.29    0.04 
 -28  -8   2    0.42    0.08 
 -28   8   2    0.43    0.06 
  28   8  -2    0.34    0.06 
  28   8  -2    0.47    0.06 
 -26  -8   2    0.26    0.06 
 -26  -8   2    0.35    0.07 
  26   8  -2    0.37    0.06 
 -26   8   2    0.36    0.05 
  26   8  -2    0.27    0.06 
 -26   8   2    0.24    0.04 
 -24  -8   2    2.90    0.21 
 -24  -8   2    3.20    0.22 
 -24   8   2    2.72    0.17 
 -24   8   2    2.73    0.19 
  24   8  -2    2.70    0.21 
  24   8  -2    2.35    0.17 
 -24   8   2    2.29    0.18 
  24   8  -2    2.82    0.21 
 -22  -8   2    2.36    0.19 
  22  -8  -2    2.22    0.18 
 -22  -8   2    2.23    0.20 
  22   8  -2    2.22    0.15 
  22   8  -2    2.26    0.20 
 -22   8   2    2.37    0.15 
 -22   8   2    2.03    0.16 
 -22   8   2    2.03    0.16 
 -20  -8   2    1.61    0.16 
 -20  -8   2    1.53    0.18 
  20  -8  -2    1.63    0.16 
 -20  -8   2    1.47    0.16 
 -20   8   2    1.83    0.14 
 -20   8   2    1.67    0.14 
 -20   8   2    1.92    0.13 
  20   8  -2    1.53    0.15 
  20   8  -2    1.72    0.18 
  20   8  -2    1.79    0.13 
  18  -8  -2    0.50    0.09 
 -18  -8   2    0.50    0.10 
 -18  -8   2    0.42    0.09 
  18  -8  -2    0.62    0.10 
 -18  -8   2    0.48    0.10 
 -18   8   2    0.49    0.11 
  18   8  -2    0.44    0.07 
 -18   8   2    0.50    0.08 
  18   8  -2    0.38    0.10 
 -18   8   2    0.51    0.06 
  16  -8  -2    0.28    0.07 
 -16  -8   2    0.28    0.08 
  16  -8  -2    0.33    0.08 
 -16  -8   2    0.25    0.08 
 -16  -8   2    0.19    0.07 
 -16  -8   2    0.32    0.08 
 -16   8   2    0.25    0.08 
  16   8  -2    0.25    0.05 
 -16   8   2    0.23    0.05 
  16   8  -2    0.27    0.09 
  16   8  -2    0.15    0.08 
 -14  -8   2    4.06    0.29 
  14  -8  -2    4.18    0.30 
  14  -8  -2    4.04    0.29 
 -14  -8   2    3.88    0.29 
 -14  -8   2    3.67    0.29 
 -14  -8   2    3.66    0.29 
 -14   8   2    4.29    0.30 
  14   8  -2    3.61    0.26 
  14   8  -2    4.10    0.34 
 -14   8   2    3.61    0.26 
  14   8  -2    3.68    0.28 
 -12  -8   2    5.67    0.48 
 -12  -8   2    5.65    0.40 
  12  -8  -2    5.09    0.46 
  12  -8  -2    5.76    0.40 
 -12  -8   2    5.38    0.48 
  12  -8  -2    5.52    0.42 
  12   8  -2    5.47    0.37 
  12   8  -2    4.92    0.41 
  12   8  -2    5.92    0.43 
  12   8  -2    4.84    0.39 
 -12   8   2    6.12    0.38 
 -10  -8   2    6.27    0.49 
  10  -8  -2    5.78    0.46 
 -10  -8   2    5.16    0.46 
 -10   8   2    5.23    0.37 
  10   8  -2    5.61    0.41 
  10   8  -2    5.04    0.35 
  10   8  -2    4.79    0.40 
  10   8  -2    4.98    0.37 
 -10   8   2    5.52    0.36 
   8  -8  -2    3.05    0.31 
  -8  -8   2    2.95    0.33 
  -8   8   2    3.59    0.25 
  -8   8   2    3.40    0.24 
   8   8  -2    3.76    0.29 
   8   8  -2    3.38    0.26 
   8   8  -2    3.46    0.29 
  -6  -8   2    5.50    0.50 
   6  -8  -2    5.35    0.46 
   6   8  -2    6.38    0.44 
   6   8  -2    6.02    0.39 
  -6   8   2    6.11    0.39 
   6   8  -2    6.50    0.42 
  -4  -8   2    9.66    0.69 
   4  -8  -2    8.38    0.62 
   4   8  -2    8.20    0.53 
  -4   8   2    8.09    0.53 
   4   8  -2    9.19    0.59 
   4   8  -2    8.54    0.57 
   2  -8  -2    1.40    0.18 
  -2  -8   2    1.54    0.22 
   2   8  -2    1.63    0.16 
   2   8  -2    1.39    0.14 
   2   8  -2    1.19    0.11 
   0  -8  -2    1.14    0.18 
   0  -8  -2    1.31    0.17 
   0  -8   2    1.25    0.21 
   0   8  -2    1.36    0.14 
   0   8  -2    1.35    0.11 
   0   8  -2    1.44    0.15 
   2   8   2    0.95    0.13 
  -2   8  -2    1.13    0.13 
  -2   8  -2    0.97    0.12 
  -2   8  -2    0.87    0.09 
  -4  -8  -2   11.13    0.77 
  -4  -8  -2   10.48    0.74 
  -4   8  -2   10.39    0.63 
   4   8   2   10.02    0.68 
  -4   8  -2    9.56    0.71 
   4   8   2   10.13    0.62 
  -4   8  -2   11.21    0.67 
  -4   8  -2    8.63    0.66 
  -6  -8  -2   10.79    0.83 
  -6  -8  -2   11.17    0.82 
   6   8   2   11.04    0.76 
  -6   8  -2   12.07    0.70 
   6   8   2   11.98    0.70 
  -6   8  -2   12.78    0.75 
  -6   8  -2   10.82    0.79 
  -6   8  -2   11.14    0.75 
  -8  -8  -2    6.23    0.57 
  -8  -8  -2    6.23    0.57 
   8   8   2    7.46    0.47 
  -8   8  -2    7.99    0.46 
  -8   8  -2    6.97    0.51 
   8   8   2    7.33    0.46 
   8   8   2    7.46    0.53 
  -8   8  -2    6.79    0.55 
  -8   8  -2    8.42    0.51 
 -10  -8  -2    2.25    0.24 
  10  -8   2    2.20    0.21 
 -10  -8  -2    2.16    0.20 
 -10  -8  -2    2.10    0.21 
  10  -8   2    2.38    0.21 
  10  -8   2    2.28    0.20 
  10  -8   2    2.13    0.19 
 -10   8  -2    2.60    0.18 
 -10   8  -2    2.55    0.17 
 -10   8  -2    2.76    0.22 
  10   8   2    2.59    0.20 
  12  -8   2    1.10    0.13 
  12  -8   2    1.19    0.15 
 -12  -8  -2    1.12    0.18 
 -12  -8  -2    1.11    0.16 
 -12  -8  -2    1.17    0.15 
  12  -8   2    1.21    0.15 
 -12  -8  -2    1.22    0.14 
 -12   8  -2    1.28    0.10 
 -12   8  -2    1.32    0.12 
 -12   8  -2    1.28    0.16 
  12   8   2    1.36    0.15 
 -14  -8  -2    5.89    0.45 
 -14  -8  -2    5.57    0.40 
  14  -8   2    5.86    0.39 
 -14  -8  -2    5.54    0.41 
  14  -8   2    5.68    0.41 
 -14  -8  -2    5.99    0.42 
 -14   8  -2    6.24    0.37 
 -14   8  -2    5.98    0.38 
  14   8   2    6.44    0.43 
  14   8   2    5.70    0.38 
 -14   8  -2    5.85    0.38 
  16  -8   2    1.74    0.16 
  16  -8   2    1.83    0.18 
 -16  -8  -2    1.91    0.19 
 -16  -8  -2    1.85    0.19 
 -16  -8  -2    2.28    0.23 
 -16  -8  -2    1.64    0.17 
  16   8   2    1.64    0.18 
 -16   8  -2    1.68    0.13 
  16   8   2    1.84    0.15 
 -16   8  -2    1.72    0.15 
 -18  -8  -2   10.92    0.70 
  18  -8   2   11.32    0.69 
 -18  -8  -2   12.27    0.71 
 -18  -8  -2   12.79    0.74 
 -18  -8  -2   12.14    0.71 
  18  -8   2   10.92    0.70 
 -18   8  -2   10.89    0.67 
  18   8   2   10.88    0.68 
 -18   8  -2   10.01    0.66 
  18   8   2   10.51    0.72 
  18   8   2   10.24    0.66 
 -18   8  -2   10.42    0.67 
 -20  -8  -2    2.44    0.23 
  20  -8   2    2.06    0.18 
 -20  -8  -2    2.50    0.21 
 -20  -8  -2    2.02    0.19 
  20   8   2    2.64    0.19 
 -20   8  -2    2.62    0.18 
 -20   8  -2    2.56    0.18 
  20   8   2    2.67    0.17 
 -22  -8  -2    1.34    0.16 
 -22  -8  -2    1.26    0.12 
  22  -8   2    1.24    0.12 
 -22  -8  -2    1.42    0.14 
 -22  -8  -2    1.44    0.13 
 -22   8  -2    1.47    0.11 
  22   8   2    1.34    0.12 
  22   8   2    1.48    0.11 
 -22   8  -2    1.36    0.11 
 -24  -8  -2    1.55    0.13 
 -24  -8  -2    1.71    0.13 
  24  -8   2    1.37    0.12 
 -24  -8  -2    1.58    0.12 
  24   8   2    1.61    0.11 
 -24   8  -2    1.48    0.11 
 -24   8  -2    1.41    0.11 
 -25  -9   2    0.18    0.05 
 -25  -9   2    0.16    0.04 
  25   9  -2    0.28    0.05 
 -25   9   2    0.29    0.05 
 -25   9   2    0.22    0.03 
  25   9  -2    0.22    0.05 
 -23  -9   2    0.38    0.07 
  23   9  -2    0.28    0.04 
 -23   9   2    0.15    0.04 
  23   9  -2    0.25    0.06 
 -23   9   2    0.25    0.04 
 -23   9   2    0.28    0.05 
  23   9  -2    0.29    0.06 
 -21  -9   2    0.27    0.06 
  21  -9  -2    0.21    0.06 
 -21  -9   2    0.23    0.08 
 -21  -9   2    0.24    0.07 
  21   9  -2    0.16    0.07 
  21   9  -2    0.13    0.04 
 -21   9   2    0.14    0.04 
  21   9  -2    0.19    0.06 
 -21   9   2    0.16    0.05 
 -21   9   2    0.08    0.06 
 -19  -9   2   -0.03    0.06 
 -19  -9   2   -0.02    0.05 
  19  -9  -2   -0.05    0.05 
 -19  -9   2    0.01    0.06 
  19  -9  -2    0.00    0.05 
  19   9  -2    0.00    0.04 
 -19   9   2   -0.02    0.04 
  19   9  -2    0.06    0.06 
  19   9  -2    0.03    0.05 
  19   9  -2    0.01    0.03 
 -19   9   2   -0.01    0.03 
 -19   9   2   -0.01    0.05 
 -19   9   2    0.00    0.04 
 -17  -9   2    0.54    0.11 
 -17  -9   2    0.62    0.10 
  17  -9  -2    0.60    0.10 
 -17  -9   2    0.60    0.10 
  17  -9  -2    0.60    0.09 
 -17   9   2    0.60    0.08 
  17   9  -2    0.63    0.08 
  17   9  -2    0.37    0.08 
  17   9  -2    0.74    0.12 
 -17   9   2    0.65    0.11 
  17   9  -2    0.58    0.13 
 -17   9   2    0.57    0.07 
  17   9  -2    0.58    0.09 
 -15  -9   2    2.33    0.21 
  15  -9  -2    2.49    0.21 
 -15  -9   2    2.52    0.22 
  15  -9  -2    2.44    0.21 
 -15  -9   2    2.56    0.21 
 -15  -9   2    2.11    0.21 
  15   9  -2    2.39    0.18 
  15   9  -2    2.45    0.20 
  15   9  -2    2.32    0.25 
 -15   9   2    2.45    0.21 
 -15   9   2    2.43    0.18 
 -13  -9   2    8.78    0.58 
  13  -9  -2    9.02    0.58 
 -13  -9   2    8.81    0.56 
 -13  -9   2    9.06    0.56 
  13  -9  -2    8.87    0.57 
 -13  -9   2    8.38    0.57 
  13   9  -2    9.18    0.56 
  13   9  -2    8.30    0.54 
  13   9  -2    8.54    0.63 
 -13   9   2    8.73    0.57 
 -13   9   2    8.47    0.54 
 -11  -9   2    2.44    0.21 
  11  -9  -2    2.52    0.22 
 -11  -9   2    2.51    0.21 
 -11  -9   2    2.38    0.20 
  11  -9  -2    2.50    0.22 
 -11  -9   2    2.53    0.21 
  11   9  -2    2.26    0.18 
  11   9  -2    2.42    0.20 
  11   9  -2    2.53    0.25 
 -11   9   2    2.48    0.20 
  -9  -9   2    1.75    0.16 
   9  -9  -2    1.79    0.19 
  -9  -9   2    1.76    0.17 
   9  -9  -2    1.68    0.18 
  -9  -9   2    1.99    0.18 
   9   9  -2    2.10    0.22 
   9   9  -2    2.16    0.17 
  -9   9   2    1.84    0.16 
   7  -9  -2    0.04    0.06 
  -7  -9   2    0.10    0.05 
  -7  -9   2    0.15    0.05 
   7  -9  -2    0.08    0.05 
   7  -9  -2    0.10    0.07 
  -7  -9   2    0.11    0.05 
   7   9  -2    0.07    0.04 
   7   9  -2    0.06    0.07 
  -7   9   2    0.08    0.04 
  -5  -9   2    1.08    0.13 
  -5  -9   2    1.16    0.21 
   5  -9  -2    0.82    0.17 
  -5  -9   2    1.24    0.15 
   5  -9  -2    1.05    0.17 
  -5  -9   2    0.78    0.12 
   5   9  -2    0.98    0.16 
   5   9  -2    1.14    0.11 
   5   9  -2    1.22    0.15 
   3  -9  -2    3.91    0.36 
  -3  -9   2    4.21    0.43 
   3   9  -2    4.45    0.29 
   3   9  -2    4.81    0.35 
   3   9  -2    4.21    0.32 
  -1  -9   2   15.54    1.13 
   1   9  -2   15.09    1.01 
   1   9  -2   17.31    1.03 
   1   9  -2   16.47    0.98 
  -1  -9  -2    7.01    0.58 
  -1   9  -2    9.18    0.52 
  -1   9  -2    7.31    0.54 
  -1   9  -2    8.93    0.56 
  -3  -9  -2    0.17    0.12 
   3  -9   2    0.20    0.06 
   3  -9   2    0.22    0.08 
   3  -9   2    0.31    0.09 
   3  -9   2    0.25    0.07 
  -3   9  -2    0.20    0.08 
  -3   9  -2    0.19    0.05 
   5  -9   2    0.18    0.08 
   5  -9   2    0.06    0.05 
   5  -9   2    0.01    0.04 
   5  -9   2    0.05    0.06 
  -5  -9  -2    0.07    0.05 
  -5   9  -2    0.14    0.04 
  -5   9  -2    0.16    0.04 
  -5   9  -2    0.20    0.08 
  -7  -9  -2    0.05    0.06 
   7  -9   2    0.04    0.05 
  -7  -9  -2   -0.01    0.09 
   7  -9   2    0.06    0.07 
  -7  -9  -2    0.05    0.07 
   7  -9   2    0.09    0.07 
  -7   9  -2    0.06    0.05 
  -7   9  -2    0.06    0.06 
  -7   9  -2    0.05    0.03 
  -7   9  -2    0.08    0.04 
  -9  -9  -2    1.59    0.18 
   9  -9   2    1.59    0.15 
  -9  -9  -2    1.61    0.16 
  -9  -9  -2    1.56    0.22 
  -9  -9  -2    1.62    0.17 
   9  -9   2    1.77    0.18 
   9  -9   2    1.57    0.18 
   9   9   2    1.83    0.17 
  -9   9  -2    1.90    0.14 
  -9   9  -2    1.77    0.13 
  -9   9  -2    1.69    0.18 
  11  -9   2    2.34    0.21 
 -11  -9  -2    2.24    0.20 
 -11  -9  -2    2.07    0.19 
 -11  -9  -2    1.95    0.24 
 -11  -9  -2    2.01    0.21 
  11  -9   2    2.30    0.21 
  11  -9   2    2.13    0.18 
 -11   9  -2    2.45    0.16 
 -11   9  -2    2.24    0.21 
  11   9   2    2.54    0.21 
 -11   9  -2    2.57    0.18 
 -13  -9  -2    1.28    0.18 
 -13  -9  -2    0.92    0.13 
 -13  -9  -2    0.99    0.12 
  13  -9   2    0.78    0.13 
  13  -9   2    1.07    0.14 
 -13  -9  -2    1.01    0.14 
  13   9   2    0.88    0.13 
 -13   9  -2    1.07    0.10 
 -13   9  -2    1.00    0.11 
 -13   9  -2    0.93    0.09 
  13   9   2    1.03    0.10 
 -15  -9  -2    1.48    0.17 
 -15  -9  -2    1.64    0.20 
 -15  -9  -2    1.84    0.18 
 -15  -9  -2    1.67    0.16 
  15  -9   2    1.40    0.17 
  15  -9   2    1.67    0.16 
 -15   9  -2    1.60    0.13 
  15   9   2    1.52    0.17 
  15   9   2    1.53    0.13 
 -15   9  -2    1.50    0.12 
 -17  -9  -2    0.41    0.09 
  17  -9   2    0.48    0.11 
 -17  -9  -2    0.46    0.10 
 -17  -9  -2    0.37    0.11 
  17  -9   2    0.33    0.07 
 -17  -9  -2    0.51    0.09 
 -17   9  -2    0.38    0.05 
  17   9   2    0.31    0.06 
 -17   9  -2    0.33    0.06 
  17   9   2    0.39    0.07 
  17   9   2    0.38    0.10 
 -17   9  -2    0.45    0.06 
 -19  -9  -2    2.26    0.19 
 -19  -9  -2    2.19    0.19 
 -19  -9  -2    2.01    0.21 
  19  -9   2    1.96    0.17 
 -19  -9  -2    1.96    0.18 
  19   9   2    2.40    0.16 
 -19   9  -2    2.37    0.16 
  19   9   2    2.35    0.17 
 -19   9  -2    2.49    0.16 
 -21  -9  -2    0.61    0.08 
 -21  -9  -2    0.79    0.10 
 -21   9  -2    0.68    0.08 
  21   9   2    0.71    0.07 
  21   9   2    0.70    0.09 
 -21   9  -2    0.76    0.07 
 -23  -9  -2    1.39    0.12 
  23   9   2    1.44    0.10 
 -23   9  -2    1.42    0.10 
 -22 -10   2    0.89    0.10 
 -22 -10   2    0.80    0.09 
 -22  10   2    0.77    0.08 
 -22  10   2    0.79    0.07 
  22  10  -2    0.94    0.09 
  20 -10  -2    0.03    0.05 
  20 -10  -2    0.02    0.04 
 -20 -10   2    0.07    0.04 
 -20 -10   2    0.02    0.05 
 -20  10   2    0.06    0.03 
  20  10  -2    0.04    0.03 
  20  10  -2    0.01    0.03 
  20  10  -2    0.04    0.05 
 -20  10   2    0.03    0.03 
 -18 -10   2    0.50    0.09 
  18 -10  -2    0.61    0.09 
 -18 -10   2    0.56    0.09 
  18 -10  -2    0.61    0.09 
 -18  10   2    0.55    0.08 
 -18  10   2    0.55    0.07 
  18  10  -2    0.66    0.07 
  18  10  -2    0.44    0.08 
  18  10  -2    0.51    0.08 
  16 -10  -2    0.47    0.09 
 -16 -10   2    0.45    0.09 
  16 -10  -2    0.36    0.08 
 -16 -10   2    0.50    0.09 
 -16  10   2    0.56    0.08 
 -16  10   2    0.53    0.10 
  16  10  -2    0.49    0.09 
 -16  10   2    0.52    0.07 
  16  10  -2    0.69    0.07 
  16  10  -2    0.62    0.09 
  14 -10  -2    2.33    0.20 
  14 -10  -2    2.35    0.20 
 -14 -10   2    2.13    0.20 
 -14 -10   2    2.38    0.20 
 -14 -10   2    2.34    0.19 
  14  10  -2    2.47    0.17 
 -14  10   2    2.30    0.20 
 -14  10   2    2.29    0.17 
  14  10  -2    2.10    0.19 
  14  10  -2    2.29    0.19 
  14  10  -2    2.04    0.24 
 -12 -10   2    7.92    0.51 
  12 -10  -2    7.79    0.51 
 -12 -10   2    8.07    0.50 
 -12 -10   2    7.29    0.51 
  12 -10  -2    7.45    0.51 
  12  10  -2    7.61    0.57 
 -12  10   2    7.53    0.48 
  12  10  -2    7.61    0.48 
 -12  10   2    7.80    0.51 
  12  10  -2    7.97    0.50 
 -10 -10   2    8.75    0.56 
  10 -10  -2    8.64    0.56 
 -10 -10   2    8.65    0.55 
 -10 -10   2    8.53    0.56 
  10 -10  -2    8.97    0.56 
 -10  10   2    8.24    0.55 
  10  10  -2    8.33    0.61 
  10  10  -2    8.87    0.55 
  10  10  -2    7.96    0.52 
  -8 -10   2    9.55    0.59 
  -8 -10   2    9.75    0.58 
   8 -10  -2    9.24    0.59 
  -8 -10   2    9.77    0.59 
   8 -10  -2    9.79    0.61 
   8  10  -2    8.66    0.64 
   8  10  -2    9.03    0.58 
  -8  10   2    8.30    0.58 
   8  10  -2    8.54    0.58 
  -6 -10   2    0.38    0.08 
   6 -10  -2    0.28    0.09 
  -6 -10   2    0.34    0.07 
  -6 -10   2    0.31    0.08 
   6  10  -2    0.59    0.12 
   6  10  -2    0.58    0.08 
  -6  10   2    0.54    0.08 
  -4 -10   2    1.94    0.18 
  -4 -10   2    2.08    0.18 
   4 -10  -2    1.78    0.19 
   4 -10  -2    1.94    0.17 
  -4 -10   2    2.02    0.17 
   4  10  -2    2.45    0.17 
   4  10  -2    2.19    0.21 
  -2 -10   2    0.90    0.11 
   2 -10  -2    0.59    0.10 
  -2 -10   2    0.64    0.12 
  -2 -10   2    0.88    0.11 
   2  10  -2    1.00    0.14 
   2  10  -2    0.95    0.10 
   0 -10   2    7.97    0.55 
   0 -10   2    7.69    0.51 
   0 -10   2    7.72    0.51 
   0  10  -2    7.58    0.50 
   0  10  -2    8.44    0.55 
   2 -10   2    7.80    0.53 
   2 -10   2    7.31    0.52 
   2 -10   2    7.34    0.49 
   2 -10   2    7.63    0.49 
  -2  10  -2    7.99    0.48 
  -2  10  -2    7.69    0.53 
  -2  10  -2    7.32    0.48 
   4 -10   2    6.19    0.45 
   4 -10   2    6.50    0.45 
   4 -10   2    6.11    0.42 
  -4  10  -2    6.70    0.46 
  -4  10  -2    5.92    0.39 
  -4  10  -2    6.55    0.41 
   6 -10   2    5.10    0.37 
  -6 -10  -2    4.27    0.33 
  -6 -10  -2    4.40    0.35 
   6 -10   2    4.85    0.37 
   6 -10   2    4.78    0.33 
  -6  10  -2    4.90    0.31 
  -6  10  -2    4.83    0.33 
  -6  10  -2    5.16    0.33 
  -6  10  -2    5.48    0.38 
  -8 -10  -2    2.06    0.18 
   8 -10   2    2.21    0.20 
   8 -10   2    2.16    0.20 
  -8 -10  -2    2.01    0.17 
   8 -10   2    2.13    0.17 
   8  10   2    1.75    0.18 
  -8  10  -2    1.88    0.15 
  -8  10  -2    1.78    0.19 
  -8  10  -2    1.83    0.14 
  10 -10   2    1.25    0.12 
 -10 -10  -2    1.20    0.13 
  10 -10   2    1.21    0.15 
 -10 -10  -2    1.26    0.13 
  10 -10   2    1.31    0.15 
  10  10   2    1.04    0.14 
 -10  10  -2    1.04    0.11 
 -10  10  -2    1.06    0.14 
 -10  10  -2    1.27    0.10 
  12 -10   2    1.40    0.16 
 -12 -10  -2    1.37    0.16 
  12 -10   2    1.59    0.16 
 -12 -10  -2    1.41    0.15 
 -12  10  -2    1.71    0.12 
 -12  10  -2    1.72    0.14 
 -12  10  -2    1.61    0.13 
  12  10   2    1.57    0.13 
  14 -10   2    0.12    0.06 
 -14 -10  -2    0.17    0.07 
  14 -10   2    0.17    0.06 
 -14 -10  -2    0.19    0.07 
 -14  10  -2    0.29    0.04 
  14  10   2    0.27    0.06 
 -14  10  -2    0.24    0.05 
 -14  10  -2    0.30    0.06 
  16 -10   2    0.73    0.10 
 -16 -10  -2    0.77    0.11 
 -16 -10  -2    0.81    0.11 
 -16  10  -2    1.02    0.08 
  16  10   2    1.06    0.10 
 -16  10  -2    1.00    0.10 
 -16  10  -2    1.07    0.09 
  18 -10   2    1.48    0.14 
 -18 -10  -2    1.78    0.15 
 -18 -10  -2    1.70    0.15 
 -18  10  -2    1.96    0.13 
 -18  10  -2    1.67    0.13 
  18  10   2    1.76    0.13 
  18  10   2    1.78    0.12 
  20 -10   2    0.24    0.05 
 -20 -10  -2    0.28    0.06 
 -20  10  -2    0.40    0.05 
  20  10   2    0.44    0.05 
 -20  10  -2    0.39    0.05 
 -19 -11   2    1.61    0.13 
 -19 -11   2    1.68    0.13 
  19 -11  -2    1.55    0.13 
 -19  11   2    1.59    0.11 
  19  11  -2    1.44    0.13 
 -17 -11   2    2.29    0.17 
  17 -11  -2    2.29    0.18 
 -17 -11   2    2.48    0.19 
  17 -11  -2    2.31    0.18 
  17  11  -2    2.17    0.18 
 -17  11   2    2.36    0.15 
 -17  11   2    2.18    0.16 
  15 -11  -2    0.22    0.06 
 -15 -11   2    0.23    0.06 
  15 -11  -2    0.19    0.06 
 -15 -11   2    0.25    0.06 
 -15  11   2    0.16    0.04 
  15  11  -2    0.11    0.04 
  15  11  -2    0.14    0.04 
 -15  11   2    0.15    0.04 
 -13 -11   2    0.20    0.06 
 -13 -11   2    0.19    0.06 
  13 -11  -2    0.29    0.07 
  13 -11  -2    0.34    0.08 
 -13 -11   2    0.32    0.07 
 -13  11   2    0.24    0.05 
  13  11  -2    0.30    0.05 
  13  11  -2    0.17    0.05 
 -11 -11   2    1.89    0.17 
  11 -11  -2    2.08    0.18 
  11 -11  -2    1.92    0.18 
 -11 -11   2    2.14    0.16 
  11  11  -2    1.47    0.19 
  11  11  -2    1.87    0.16 
 -11  11   2    1.83    0.16 
  11  11  -2    2.00    0.14 
 -11  11   2    1.77    0.14 
   9 -11  -2    1.99    0.18 
  -9 -11   2    2.10    0.18 
  -9 -11   2    2.08    0.18 
  -9 -11   2    2.23    0.17 
   9 -11  -2    2.33    0.19 
  -9  11   2    1.97    0.17 
   9  11  -2    1.79    0.21 
   9  11  -2    2.18    0.17 
   7  11  -2    0.88    0.13 
   7  11  -2    0.92    0.10 
  -7  11   2    0.85    0.10 
  -5 -11   2    2.74    0.21 
   5 -11  -2    2.83    0.23 
  -5 -11   2    2.76    0.21 
   5  11  -2    2.67    0.20 
   5  11  -2    2.63    0.24 
  -5  11   2    2.37    0.20 
   5  11  -2    2.48    0.18 
  -3 -11   2    4.11    0.28 
   3 -11  -2    3.50    0.29 
  -3 -11   2    3.53    0.33 
  -3 -11   2    4.05    0.28 
   3  11  -2    3.80    0.25 
   3  11  -2    4.05    0.32 
   3  11  -2    4.23    0.27 
  -1 -11   2    1.50    0.15 
  -1 -11   2    1.51    0.18 
  -1 -11   2    1.59    0.15 
   1  11  -2    1.81    0.18 
   1  11  -2    1.66    0.13 
   1  11  -2    1.79    0.14 
   1 -11   2    1.71    0.19 
   1 -11   2    1.71    0.16 
   1 -11   2    1.71    0.16 
  -1  11  -2    1.98    0.15 
  -1  11  -2    1.74    0.13 
  -1  11  -2    1.82    0.18 
   3 -11   2    0.20    0.08 
   3 -11   2    0.20    0.06 
   3 -11   2    0.20    0.08 
  -3  11  -2    0.23    0.05 
  -3  11  -2    0.24    0.08 
  -3  11  -2    0.22    0.04 
   5 -11   2    0.00    0.06 
   5 -11   2    0.04    0.04 
   5 -11   2    0.06    0.06 
  -5  11  -2    0.06    0.03 
  -5  11  -2    0.08    0.06 
  -5  11  -2    0.06    0.04 
  -5  11  -2    0.03    0.04 
   7 -11   2    0.41    0.09 
   7 -11   2    0.33    0.09 
  -7 -11  -2    0.31    0.08 
   7 -11   2    0.43    0.07 
  -7  11  -2    0.51    0.07 
  -7  11  -2    0.47    0.06 
   7  11   2    0.54    0.09 
  -7  11  -2    0.42    0.10 
  -9 -11  -2    2.79    0.22 
   9 -11   2    3.02    0.23 
   9 -11   2    2.80    0.22 
  -9  11  -2    2.73    0.19 
  -9  11  -2    2.78    0.18 
  -9  11  -2    2.35    0.25 
   9  11   2    2.41    0.26 
  11 -11   2    4.92    0.34 
  11 -11   2    4.99    0.33 
 -11 -11  -2    5.18    0.35 
 -11  11  -2    4.92    0.30 
 -11  11  -2    4.87    0.31 
  11  11   2    4.42    0.32 
 -11  11  -2    4.31    0.31 
  13 -11   2    3.91    0.28 
  13 -11   2    3.85    0.27 
 -13  11  -2    4.41    0.25 
 -13  11  -2    4.17    0.26 
 -13  11  -2    3.35    0.26 
  13  11   2    3.94    0.26 
  15 -11   2    2.40    0.19 
  15 -11   2    2.21    0.18 
 -15  11  -2    2.75    0.17 
 -15  11  -2    2.47    0.16 
 -15  11  -2    2.50    0.17 
  17 -11   2    1.30    0.11 
 -17  11  -2    1.29    0.10 
  17  11   2    1.33    0.10 
 -17  11  -2    1.48    0.10 
  16 -12  -2    0.15    0.04 
 -16 -12   2    0.12    0.04 
  16  12  -2    0.12    0.04 
 -16  12   2    0.19    0.03 
  16  12  -2    0.13    0.03 
  14 -12  -2    0.14    0.05 
 -14 -12   2    0.08    0.05 
  14 -12  -2    0.14    0.05 
 -14  12   2    0.09    0.03 
  14  12  -2    0.05    0.02 
  14  12  -2    0.08    0.04 
 -12 -12   2    1.07    0.11 
  12 -12  -2    1.33    0.12 
 -12 -12   2    1.15    0.11 
  12 -12  -2    1.31    0.12 
  12  12  -2    0.87    0.10 
  12  12  -2    0.91    0.10 
  12  12  -2    1.01    0.09 
 -12  12   2    0.94    0.09 
  10 -12  -2    2.10    0.18 
 -10 -12   2    1.89    0.16 
  10 -12  -2    1.84    0.16 
 -10 -12   2    2.08    0.16 
 -10  12   2    1.83    0.14 
  10  12  -2    1.95    0.16 
  10  12  -2    2.14    0.14 
  10  12  -2    1.91    0.15 
  -8 -12   2    0.22    0.06 
   8 -12  -2    0.21    0.07 
  -8 -12   2    0.26    0.06 
   8  12  -2    0.26    0.05 
   8  12  -2    0.29    0.04 
   6 -12  -2    0.30    0.07 
  -6 -12   2    0.30    0.06 
  -6 -12   2    0.27    0.07 
   6  12  -2    0.29    0.05 
   6  12  -2    0.25    0.05 
   4 -12  -2    0.14    0.06 
  -4 -12   2    0.14    0.06 
  -4 -12   2    0.14    0.05 
   4  12  -2    0.12    0.04 
   4  12  -2    0.14    0.04 
  -2 -12   2    0.13    0.05 
  -2 -12   2    0.08    0.05 
  -2 -12   2    0.11    0.06 
   2  12  -2    0.12    0.03 
   2  12  -2    0.11    0.06 
   2  12  -2    0.12    0.04 
   0 -12   2    2.18    0.17 
   0 -12   2    2.10    0.19 
   0  12  -2    1.97    0.16 
   0  12  -2    2.15    0.15 
   2 -12   2    1.01    0.13 
   2 -12   2    1.01    0.11 
  -2  12  -2    0.96    0.08 
  -2  12  -2    0.93    0.09 
   4 -12   2    0.43    0.07 
   4 -12   2    0.40    0.09 
   4 -12   2    0.48    0.10 
  -4  12  -2    0.56    0.07 
  -4  12  -2    0.57    0.08 
  -4  12  -2    0.59    0.06 
   6 -12   2    0.79    0.09 
   6 -12   2    0.83    0.11 
   6 -12   2    0.73    0.11 
  -6  12  -2    0.66    0.06 
  -6  12  -2    0.58    0.07 
   8 -12   2    1.18    0.12 
   8 -12   2    1.11    0.12 
  -8  12  -2    0.85    0.09 
  -8  12  -2    0.91    0.09 
  -8  12  -2    0.99    0.08 
  10 -12   2    1.12    0.11 
  10 -12   2    1.08    0.11 
 -10  12  -2    0.92    0.08 
 -10  12  -2    0.87    0.09 
  12 -12   2    1.34    0.12 
  12 -12   2    1.20    0.11 
 -12  12  -2    1.27    0.09 
 -12  12  -2    1.20    0.10 
  14 -12   2    1.47    0.12 
 -14  12  -2    1.55    0.11 
 -11 -13   2    0.61    0.07 
  11 -13  -2    0.63    0.08 
  11  13  -2    0.55    0.05 
  -9 -13   2    0.22    0.05 
  -9 -13   2    0.22    0.05 
   9 -13  -2    0.29    0.06 
   9  13  -2    0.25    0.04 
   9  13  -2    0.16    0.05 
   7 -13  -2    2.03    0.16 
  -7 -13   2    2.24    0.15 
  -7 -13   2    2.13    0.15 
   7  13  -2    1.86    0.13 
   7  13  -2    1.60    0.15 
  -5 -13   2    2.21    0.16 
   5 -13  -2    1.92    0.16 
   5  13  -2    1.94    0.13 
   5  13  -2    1.82    0.16 
  -3 -13   2    2.79    0.19 
   3  13  -2    2.75    0.17 
   3  13  -2    2.42    0.20 
  -1 -13   2    2.86    0.20 
   1  13  -2    2.91    0.18 
   1  13  -2    2.73    0.19 
   1 -13   2    2.31    0.18 
   1 -13   2    2.44    0.17 
  -1  13  -2    2.25    0.15 
  -1  13  -2    2.01    0.16 
   3 -13   2    1.77    0.13 
   3 -13   2    1.65    0.14 
  -3  13  -2    1.50    0.11 
   5 -13   2    0.16    0.05 
  -5  13  -2    0.18    0.03 
   7 -13   2    0.59    0.08 
   7 -13   2    0.71    0.08 
  -7  13  -2    0.58    0.06 
  -7  13  -2    0.68    0.06 
 -34   0   3    0.04    0.03 
  34   0  -3    0.04    0.04 
  32   0  -3    0.01    0.05 
 -32   0   3    0.01    0.04 
  30   0  -3    0.06    0.05 
 -30   0   3    0.01    0.05 
  30   0  -3    0.04    0.06 
  28   0  -3   -0.02    0.05 
  28   0  -3    0.03    0.06 
 -28   0   3   -0.03    0.05 
  26   0  -3    3.77    0.30 
 -26   0   3    3.98    0.28 
  26   0  -3    3.71    0.29 
 -26   0   3    3.71    0.29 
 -26   0   3    3.64    0.27 
 -24   0   3    0.11    0.08 
  24   0  -3    0.03    0.07 
 -24   0   3    0.01    0.06 
  24   0  -3    0.07    0.07 
 -24   0   3   -0.02    0.06 
 -22   0   3    5.30    0.39 
 -22   0   3    4.71    0.43 
 -22   0   3    4.91    0.33 
  20   0  -3    1.77    0.18 
 -20   0   3    2.10    0.20 
 -20   0   3    1.63    0.22 
  20   0  -3    1.77    0.15 
 -20   0   3    1.73    0.15 
  18   0  -3    0.12    0.07 
 -18   0   3    0.27    0.11 
  18   0  -3    0.15    0.05 
 -18   0   3    0.13    0.05 
 -18   0   3    0.15    0.06 
 -18   0   3    0.16    0.08 
 -16   0   3    0.00    0.03 
  16   0  -3    0.09    0.06 
  16   0  -3   -0.01    0.04 
 -16   0   3    0.01    0.05 
 -16   0   3    0.02    0.04 
 -16   0   3   -0.01    0.05 
 -14   0   3   12.49    0.74 
  14   0  -3   12.69    0.77 
  14   0  -3   11.95    0.74 
 -14   0   3   10.89    0.77 
 -14   0   3   12.58    0.76 
 -14   0   3   12.82    0.81 
 -12   0   3    4.91    0.31 
 -12   0   3    4.34    0.33 
 -12   0   3    4.67    0.33 
 -12   0   3    4.92    0.32 
  12   0  -3    5.01    0.33 
 -12   0   3    4.77    0.36 
  12   0  -3    4.88    0.31 
 -10   0   3    8.74    0.54 
 -10   0   3    9.46    0.56 
  10   0  -3    8.16    0.54 
 -10   0   3    9.73    0.59 
 -10   0   3    8.42    0.56 
  -8   0   3   10.15    0.59 
  -8   0   3    9.36    0.57 
   8   0  -3    8.37    0.58 
  -8   0   3   10.04    0.61 
  -8   0   3    9.25    0.58 
  -6   0   3    2.78    0.20 
  -6   0   3    3.31    0.24 
  -6   0   3    3.26    0.22 
  -6   0   3    3.02    0.21 
  -4   0   3    0.32    0.05 
  -4   0   3    0.37    0.05 
  -4   0   3    0.25    0.03 
  -4   0   3    0.33    0.06 
  -2   0   3    0.11    0.04 
  -2   0   3    0.11    0.03 
  -2   0   3    0.12    0.03 
   0   0   3    4.49    0.31 
   0   0   3    5.05    0.33 
   0   0   3    5.54    0.35 
   0   0  -3    5.23    0.34 
   0   0  -3    4.82    0.35 
   0   0   3    5.53    0.33 
  -2   0  -3    3.51    0.25 
   2   0   3    3.73    0.24 
   2   0   3    3.22    0.22 
   2   0   3    3.58    0.24 
  -2   0  -3    3.34    0.26 
   2   0   3    3.64    0.26 
   4   0   3    1.76    0.14 
   4   0   3    1.64    0.14 
   4   0   3    1.76    0.14 
  -4   0  -3    1.69    0.15 
  -4   0  -3    1.61    0.16 
   4   0   3    1.62    0.12 
   4   0   3    1.81    0.16 
   6   0   3    0.89    0.10 
   6   0   3    0.90    0.09 
   6   0   3    0.86    0.08 
  -6   0  -3    0.91    0.11 
  -6   0  -3    0.92    0.14 
   8   0   3    4.43    0.31 
   8   0   3    4.28    0.32 
   8   0   3    4.28    0.28 
  10   0   3    2.82    0.23 
  10   0   3    2.35    0.21 
  10   0   3    2.79    0.19 
  12   0   3    1.64    0.18 
  12   0   3    1.79    0.14 
  14   0   3    6.22    0.39 
  14   0   3    5.73    0.44 
  14   0   3    5.46    0.43 
  16   0   3    1.69    0.20 
  16   0   3    1.72    0.19 
  16   0   3    1.66    0.14 
  18   0   3    1.08    0.17 
  18   0   3    1.10    0.11 
  18   0   3    1.25    0.17 
 -20   0  -3    2.35    0.19 
  20   0   3    2.49    0.20 
  20   0   3    2.52    0.21 
 -20   0  -3    2.30    0.19 
  20   0   3    2.54    0.25 
  22   0   3    0.07    0.06 
 -22   0  -3    0.13    0.06 
 -22   0  -3    0.08    0.05 
  22   0   3    0.06    0.06 
  22   0   3    0.02    0.06 
 -22   0  -3    0.09    0.06 
 -24   0  -3    1.02    0.11 
  24   0   3    1.00    0.13 
  24   0   3    0.96    0.12 
 -24   0  -3    0.99    0.10 
  26   0   3    0.07    0.05 
 -26   0  -3    0.07    0.04 
  26   0   3    0.12    0.06 
 -26   0  -3    0.08    0.05 
  28   0   3    0.43    0.07 
  28   0   3    0.44    0.07 
 -28   0  -3    0.45    0.07 
 -28   0  -3    0.36    0.06 
  30   0   3    0.81    0.08 
 -33  -1   3    0.69    0.09 
  33  -1  -3    0.76    0.10 
  33  -1  -3    0.60    0.08 
 -33   1   3    0.81    0.09 
  33   1  -3    0.71    0.09 
  31  -1  -3    1.55    0.15 
  31  -1  -3    1.55    0.14 
 -31  -1   3    1.64    0.14 
 -31   1   3    1.75    0.14 
  31   1  -3    1.44    0.15 
 -29  -1   3    0.65    0.09 
  29  -1  -3    0.59    0.10 
  29  -1  -3    0.57    0.10 
  29   1  -3    0.44    0.09 
 -29   1   3    0.70    0.09 
 -27  -1   3    3.19    0.25 
  27  -1  -3    3.03    0.26 
  27  -1  -3    3.18    0.26 
  27   1  -3    3.02    0.26 
 -27   1   3    3.45    0.24 
 -27   1   3    3.32    0.24 
  25  -1  -3    0.63    0.11 
  25  -1  -3    0.62    0.11 
 -25  -1   3    0.52    0.11 
 -25  -1   3    0.51    0.09 
 -25  -1   3    0.51    0.09 
  25   1  -3    0.45    0.11 
 -25   1   3    0.58    0.13 
 -25   1   3    0.49    0.08 
 -25   1   3    0.44    0.08 
 -23  -1   3    6.09    0.42 
  23  -1  -3    6.23    0.51 
 -23  -1   3    6.09    0.43 
 -23   1   3    5.40    0.41 
 -23   1   3    5.81    0.40 
  23   1  -3    6.43    0.41 
 -23   1   3    6.77    0.47 
 -21  -1   3    0.27    0.11 
 -21  -1   3    0.40    0.10 
  21  -1  -3    0.27    0.13 
 -21   1   3    0.38    0.13 
  21   1  -3    0.59    0.09 
 -21   1   3    0.59    0.13 
 -21   1   3    0.54    0.08 
 -19  -1   3    1.81    0.19 
 -19  -1   3    1.77    0.22 
 -19  -1   3    1.75    0.18 
  19  -1  -3    1.72    0.18 
 -19  -1   3    1.66    0.14 
 -19  -1   3    1.60    0.19 
  19   1  -3    2.26    0.19 
 -19   1   3    2.10    0.23 
 -19   1   3    2.28    0.17 
  19   1  -3    2.20    0.17 
 -19   1   3    2.23    0.21 
  17  -1  -3   13.01    0.84 
 -17  -1   3   12.63    0.79 
 -17  -1   3   11.77    0.88 
 -17  -1   3   12.63    0.82 
 -17  -1   3   13.28    0.84 
 -17   1   3   12.42    0.86 
 -17   1   3   13.70    0.80 
  17   1  -3   13.86    0.83 
 -17   1   3   13.70    0.89 
  17   1  -3   12.84    0.79 
  17   1  -3   14.06    0.81 
 -15  -1   3   24.56    1.45 
 -15  -1   3   23.22    1.45 
 -15  -1   3   23.83    1.50 
  15  -1  -3   25.18    1.46 
 -15  -1   3   22.99    1.42 
 -15   1   3   24.98    1.42 
 -15   1   3   22.61    1.43 
  15   1  -3   23.99    1.43 
 -15   1   3   24.95    1.50 
  15   1  -3   23.03    1.40 
 -13  -1   3   42.49    2.48 
 -13  -1   3   41.64    2.41 
 -13  -1   3   38.78    2.44 
  13  -1  -3   43.62    2.45 
 -13  -1   3   42.00    2.43 
  13   1  -3   41.27    2.40 
 -13   1   3   41.68    2.47 
 -13   1   3   40.34    2.41 
 -13   1   3   39.90    2.42 
  13   1  -3   40.53    2.42 
 -13   1   3   39.42    2.43 
 -11  -1   3   11.59    0.65 
 -11  -1   3   11.01    0.66 
 -11  -1   3   11.97    0.63 
 -11  -1   3   11.47    0.69 
 -11   1   3    9.18    0.63 
 -11   1   3    9.80    0.65 
 -11   1   3    9.37    0.64 
  11   1  -3   10.10    0.64 
 -11   1   3    9.48    0.67 
  11   1  -3   10.12    0.62 
   9  -1  -3    1.77    0.15 
  -9  -1   3    1.73    0.19 
  -9  -1   3    1.87    0.16 
  -9  -1   3    1.60    0.15 
  -9  -1   3    1.89    0.14 
  -9   1   3    1.49    0.13 
  -9   1   3    1.47    0.15 
  -9   1   3    1.52    0.13 
   9   1  -3    1.51    0.11 
   9   1  -3    1.62    0.13 
  -7  -1   3   19.86    1.19 
  -7  -1   3   20.10    1.21 
   7  -1  -3   20.86    1.22 
  -7  -1   3   19.81    1.24 
  -7  -1   3   19.86    1.21 
  -7   1   3   21.06    1.21 
   7   1  -3   19.17    1.20 
  -7   1   3   21.57    1.21 
   7   1  -3   20.17    1.18 
  -7   1   3   19.45    1.22 
  -5  -1   3    4.65    0.37 
  -5  -1   3    4.75    0.36 
  -5   1   3    6.49    0.37 
   5   1  -3    6.47    0.35 
  -5   1   3    6.50    0.37 
  -3  -1   3  147.06    8.57 
   3  -1  -3  137.96    8.56 
  -3  -1   3  150.34    8.69 
  -3  -1   3  152.62    8.64 
   3  -1  -3  145.72    8.69 
   3   1  -3  140.81    8.55 
  -3   1   3  146.67    8.63 
  -3   1   3  144.71    8.58 
  -3   1   3  153.68    8.58 
   1  -1  -3   59.85    3.40 
  -1  -1   3   60.61    3.38 
  -1  -1   3   60.79    3.41 
  -1  -1   3   57.89    3.36 
  -1  -1   3   58.68    3.38 
   1  -1  -3   53.64    3.37 
  -1   1   3   57.24    3.39 
   1   1  -3   55.77    3.36 
  -1   1   3   57.82    3.38 
   1   1  -3   55.24    3.40 
  -1   1   3   56.69    3.37 
   1  -1   3    8.15    0.57 
   1  -1   3    7.74    0.54 
   1  -1   3    8.41    0.54 
   1  -1   3    8.05    0.52 
  -1  -1  -3    8.38    0.56 
   1   1   3    9.09    0.53 
  -1   1  -3    9.16    0.52 
  -1   1  -3    9.02    0.57 
   1   1   3    9.35    0.56 
   1   1   3    9.58    0.55 
   3  -1   3   31.38    1.88 
   3  -1   3   33.89    1.91 
   3  -1   3   31.73    1.86 
  -3  -1  -3   31.51    1.90 
   3  -1   3   31.53    1.87 
  -3  -1  -3   33.79    1.91 
   3  -1   3   29.57    1.87 
   3   1   3   34.07    1.90 
  -3   1  -3   33.24    1.91 
  -3   1  -3   31.03    1.85 
   3   1   3   32.79    1.87 
  -3   1  -3   29.84    1.87 
   3   1   3   27.16    1.88 
   5  -1   3   24.02    1.46 
   5  -1   3   26.95    1.51 
   5  -1   3   26.00    1.47 
   5  -1   3   25.21    1.44 
  -5  -1  -3   25.77    1.50 
  -5  -1  -3   25.01    1.48 
   5  -1   3   22.95    1.46 
   5   1   3   21.96    1.45 
  -5   1  -3   22.67    1.43 
  -5   1  -3   24.54    1.50 
   5   1   3   25.52    1.46 
  -5   1  -3   22.56    1.45 
  -7  -1  -3    3.17    0.25 
   7  -1   3    2.74    0.24 
   7  -1   3    3.31    0.25 
   7  -1   3    3.05    0.22 
   7  -1   3    3.45    0.28 
   7  -1   3    3.29    0.21 
  -7  -1  -3    3.40    0.27 
  -7   1  -3    2.61    0.19 
   7   1   3    3.18    0.23 
  -7   1  -3    3.07    0.22 
  -7   1  -3    3.13    0.27 
   7   1   3    3.31    0.23 
   9  -1   3    1.46    0.17 
   9  -1   3    1.72    0.18 
   9  -1   3    1.60    0.14 
  -9  -1  -3    1.65    0.17 
  -9   1  -3    1.93    0.15 
   9   1   3    1.93    0.16 
   9   1   3    2.00    0.17 
  -9   1  -3    1.89    0.20 
  11  -1   3    0.33    0.10 
  11  -1   3    0.35    0.10 
  11  -1   3    0.32    0.06 
 -11   1  -3    0.42    0.07 
  11   1   3    0.50    0.10 
  11   1   3    0.36    0.08 
  11   1   3    0.43    0.09 
 -11   1  -3    0.41    0.12 
  11   1   3    0.39    0.06 
  13  -1   3   10.63    0.66 
  13  -1   3   10.35    0.68 
  13  -1   3   10.53    0.60 
 -13   1  -3    9.42    0.60 
  13   1   3    8.13    0.62 
  13   1   3    9.01    0.59 
  13   1   3    9.08    0.64 
  15  -1   3   12.23    0.75 
  15  -1   3   11.33    0.69 
  15  -1   3   11.02    0.77 
  15   1   3   10.38    0.74 
  15   1   3   11.37    0.69 
  15   1   3   10.12    0.68 
  17  -1   3    1.15    0.11 
  17  -1   3    1.31    0.18 
  17  -1   3    1.10    0.15 
  17   1   3    0.72    0.11 
  17   1   3    0.93    0.10 
  17   1   3    0.91    0.15 
  19  -1   3    6.53    0.41 
  19  -1   3    6.49    0.41 
  19  -1   3    6.62    0.47 
  19  -1   3    5.28    0.39 
 -19  -1  -3    6.37    0.40 
 -19  -1  -3    6.16    0.40 
  19   1   3    6.04    0.38 
  19   1   3    5.84    0.46 
  19   1   3    6.80    0.62 
  19   1   3    5.83    0.41 
  19   1   3    5.67    0.40 
 -19   1  -3    5.98    0.41 
 -19   1  -3    5.84    0.39 
  21  -1   3    5.51    0.37 
  21  -1   3    5.39    0.37 
 -21  -1  -3    5.16    0.36 
  21  -1   3    5.25    0.40 
 -21  -1  -3    5.50    0.35 
  21   1   3    5.46    0.37 
 -21   1  -3    4.71    0.36 
 -21   1  -3    5.40    0.35 
  21   1   3    5.31    0.42 
 -21   1  -3    4.91    0.34 
  21   1   3    5.38    0.37 
 -23  -1  -3    0.58    0.10 
  23  -1   3    0.45    0.09 
 -23  -1  -3    0.36    0.07 
 -23  -1  -3    0.40    0.08 
  23  -1   3    0.45    0.09 
  23   1   3    0.39    0.09 
 -23   1  -3    0.46    0.07 
 -23   1  -3    0.43    0.08 
  23   1   3    0.59    0.10 
 -25  -1  -3    0.81    0.10 
  25  -1   3    0.88    0.11 
  25  -1   3    1.06    0.12 
 -25  -1  -3    1.09    0.12 
  25   1   3    1.04    0.12 
 -25   1  -3    0.95    0.10 
  25   1   3    1.15    0.12 
 -25   1  -3    1.03    0.11 
 -27  -1  -3    0.10    0.05 
  27  -1   3    0.10    0.05 
 -27  -1  -3    0.04    0.05 
  27  -1   3    0.13    0.06 
  27   1   3    0.13    0.06 
 -27   1  -3    0.13    0.05 
 -27   1  -3    0.09    0.04 
  27   1   3    0.16    0.06 
  29  -1   3    0.26    0.05 
  29  -1   3    0.26    0.06 
 -29  -1  -3    0.21    0.05 
 -29   1  -3    0.20    0.05 
  29   1   3    0.18    0.05 
 -29   1  -3    0.23    0.05 
  29   1   3    0.19    0.05 
 -34  -2   3    0.07    0.04 
  32  -2  -3    0.69    0.09 
 -32  -2   3    0.71    0.09 
  32  -2  -3    0.80    0.10 
 -32   2   3    0.79    0.09 
  32   2  -3    0.54    0.10 
  30  -2  -3    0.63    0.10 
 -30  -2   3    0.55    0.09 
 -30  -2   3    0.49    0.08 
  30  -2  -3    0.76    0.11 
 -30   2   3    0.76    0.10 
 -28  -2   3    0.46    0.08 
  28  -2  -3    0.66    0.11 
 -28  -2   3    0.51    0.09 
  28  -2  -3    0.62    0.11 
 -28   2   3    0.57    0.09 
  28   2  -3    0.46    0.09 
 -28   2   3    0.40    0.08 
  26  -2  -3    3.84    0.31 
 -26  -2   3    4.19    0.35 
 -26  -2   3    4.04    0.30 
  26  -2  -3    4.49    0.32 
 -26   2   3    3.53    0.33 
 -26   2   3    4.37    0.29 
  26   2  -3    4.36    0.32 
 -26   2   3    4.17    0.29 
  24  -2  -3    6.06    0.43 
  24  -2  -3    6.12    0.44 
 -24  -2   3    5.39    0.41 
 -24  -2   3    6.38    0.42 
  24   2  -3    6.59    0.43 
 -24   2   3    6.75    0.48 
 -24   2   3    6.34    0.41 
 -24   2   3    6.42    0.41 
  24   2  -3    6.04    0.44 
 -22  -2   3    0.29    0.07 
 -22  -2   3    0.18    0.07 
 -22   2   3    0.11    0.09 
 -22   2   3    0.15    0.09 
  22   2  -3    0.14    0.07 
 -22   2   3    0.11    0.06 
  20  -2  -3    1.19    0.15 
 -20  -2   3    1.25    0.18 
 -20  -2   3    1.41    0.15 
 -20  -2   3    1.35    0.17 
  20   2  -3    0.90    0.09 
 -20   2   3    0.98    0.16 
  20   2  -3    1.17    0.13 
 -20   2   3    1.01    0.11 
  20   2  -3    1.08    0.13 
 -20   2   3    0.91    0.13 
 -18  -2   3    0.01    0.05 
 -18  -2   3    0.03    0.06 
  18  -2  -3    0.02    0.05 
 -18  -2   3    0.04    0.05 
 -18  -2   3    0.07    0.07 
  18   2  -3    0.03    0.05 
 -18   2   3    0.03    0.04 
  18   2  -3    0.04    0.03 
 -18   2   3    0.06    0.06 
 -16  -2   3    4.06    0.30 
  16  -2  -3    3.92    0.31 
 -16  -2   3    4.11    0.30 
 -16  -2   3    3.79    0.34 
 -16  -2   3    3.68    0.26 
  16   2  -3    4.45    0.26 
 -16   2   3    3.81    0.30 
 -16   2   3    3.67    0.29 
 -16   2   3    4.18    0.34 
 -16   2   3    4.18    0.27 
  16   2  -3    4.29    0.30 
 -14  -2   3    2.35    0.16 
 -14  -2   3    2.21    0.19 
 -14  -2   3    2.26    0.19 
  14  -2  -3    2.24    0.20 
 -14  -2   3    2.03    0.22 
 -14   2   3    2.45    0.23 
 -14   2   3    2.24    0.19 
 -14   2   3    2.28    0.17 
  14   2  -3    2.57    0.16 
 -14   2   3    2.59    0.20 
  14   2  -3    2.61    0.19 
 -12  -2   3   37.69    2.20 
 -12  -2   3   33.33    2.15 
  12  -2  -3   36.65    2.17 
 -12  -2   3   35.26    2.12 
 -12  -2   3   35.25    2.15 
 -12  -2   3   34.69    2.18 
  12   2  -3   34.02    2.15 
 -12   2   3   36.58    2.15 
 -12   2   3   39.47    2.17 
 -12   2   3   39.10    2.19 
  12   2  -3   36.78    2.12 
  10  -2  -3   47.23    2.72 
 -10  -2   3   45.94    2.72 
 -10  -2   3   42.12    2.71 
 -10  -2   3   49.79    2.74 
 -10  -2   3   46.79    2.67 
 -10  -2   3   43.63    2.70 
 -10  -2   3   45.60    2.70 
 -10   2   3   47.23    2.72 
  10   2  -3   46.56    2.67 
 -10   2   3   47.44    2.69 
 -10   2   3   44.64    2.69 
  10   2  -3   41.83    2.69 
  -8  -2   3   25.21    1.45 
  -8  -2   3   23.95    1.48 
   8  -2  -3   25.16    1.49 
  -8  -2   3   25.36    1.48 
  -8  -2   3   25.22    1.51 
   8   2  -3   25.36    1.45 
  -8   2   3   24.61    1.49 
  -8   2   3   24.79    1.47 
  -8   2   3   25.32    1.47 
   8   2  -3   22.28    1.47 
  -6  -2   3   33.52    1.88 
  -6  -2   3   33.55    1.94 
  -6  -2   3   33.36    1.90 
   6  -2  -3   33.60    1.91 
   6   2  -3   28.52    1.90 
  -6   2   3   32.53    1.89 
  -6   2   3   31.74    1.89 
  -6   2   3   30.97    1.90 
   6   2  -3   30.79    1.88 
  -4  -2   3   25.40    1.48 
   4  -2  -3   25.47    1.49 
  -4  -2   3   25.43    1.47 
  -4  -2   3   25.17    1.52 
   4  -2  -3   26.38    1.51 
   4   2  -3   24.29    1.47 
  -4   2   3   23.66    1.49 
  -4   2   3   24.45    1.49 
  -4   2   3   24.77    1.47 
   2  -2  -3    2.11    0.18 
   2  -2  -3    2.12    0.16 
  -2  -2   3    2.15    0.16 
  -2  -2   3    2.28    0.20 
   2  -2  -3    2.00    0.18 
   2   2  -3    2.32    0.19 
  -2   2   3    2.37    0.17 
  -2   2   3    2.31    0.17 
  -2   2   3    2.57    0.16 
   2   2  -3    2.44    0.15 
   0  -2   3    8.68    0.57 
   0  -2  -3    8.10    0.56 
   0  -2   3    9.33    0.56 
   0  -2   3    8.49    0.57 
   0  -2  -3    9.14    0.60 
   0  -2   3    9.18    0.61 
   0  -2  -3    9.22    0.60 
   0   2   3    9.82    0.58 
   0   2  -3   10.01    0.61 
   0   2   3    9.61    0.56 
   0   2   3    9.47    0.58 
   0   2  -3    9.95    0.56 
   2  -2   3    3.91    0.25 
   2  -2   3    4.20    0.31 
   2  -2   3    4.09    0.26 
   2  -2   3    3.79    0.28 
  -2  -2  -3    4.19    0.30 
  -2  -2  -3    3.79    0.29 
  -2   2  -3    3.25    0.27 
   2   2   3    4.00    0.26 
  -2   2  -3    4.46    0.31 
  -2   2  -3    4.05    0.25 
   2   2   3    4.28    0.28 
  -4  -2  -3   59.54    3.47 
   4  -2   3   58.52    3.45 
  -4  -2  -3   60.07    3.47 
   4  -2   3   61.57    3.42 
   4  -2   3   59.99    3.48 
   4  -2   3   52.70    3.44 
   4  -2   3   53.87    3.42 
  -4   2  -3   62.44    3.48 
  -4   2  -3   55.84    3.44 
   4   2   3   63.04    3.45 
   4   2   3   60.67    3.42 
   4   2   3   50.86    3.42 
  -4   2  -3   60.83    3.41 
   6  -2   3   73.46    4.28 
  -6  -2  -3   75.66    4.30 
   6  -2   3   72.40    4.31 
   6  -2   3   69.21    4.27 
   6  -2   3   75.29    4.24 
  -6  -2  -3   69.99    4.30 
   6   2   3   74.84    4.25 
  -6   2  -3   72.59    4.26 
  -6   2  -3   71.03    4.31 
  -6   2  -3   71.69    4.23 
   8  -2   3    4.27    0.32 
   8  -2   3    4.48    0.40 
   8  -2   3    4.67    0.37 
  -8  -2  -3    4.19    0.37 
  -8  -2  -3    4.68    0.38 
   8   2   3    5.63    0.36 
   8   2   3    5.55    0.35 
  -8   2  -3    5.66    0.36 
  -8   2  -3    5.82    0.32 
  -8   2  -3    6.01    0.42 
  10  -2   3    0.47    0.12 
 -10  -2  -3    0.53    0.11 
  10  -2   3    0.43    0.13 
 -10  -2  -3    0.46    0.10 
  10  -2   3    0.49    0.07 
  10  -2   3    0.55    0.10 
  12  -2   3   32.24    1.93 
 -12  -2  -3   31.85    1.91 
  12  -2   3   31.38    1.90 
 -12  -2  -3   29.39    1.91 
  12  -2   3   31.63    1.84 
  12   2   3   31.33    1.88 
  12   2   3   29.76    1.87 
  12   2   3   29.55    1.86 
 -12   2  -3   30.73    1.96 
 -12   2  -3   32.99    1.87 
  14  -2   3    6.69    0.44 
  14  -2   3    6.96    0.54 
  14  -2   3    7.09    0.50 
  14   2   3    7.21    0.50 
 -14   2  -3    7.96    0.48 
  14   2   3    6.50    0.48 
  14   2   3    6.90    0.44 
  14   2   3    6.99    0.48 
 -14   2  -3    6.69    0.57 
  16  -2   3    2.20    0.18 
  16  -2   3    2.63    0.28 
  16  -2   3    2.71    0.24 
  16   2   3    2.19    0.23 
  16   2   3    2.45    0.18 
  16   2   3    2.38    0.22 
 -16   2  -3    2.48    0.20 
  16   2   3    2.14    0.18 
  18  -2   3    6.44    0.44 
  18  -2   3    5.56    0.48 
  18   2   3    5.93    0.39 
  18   2   3    6.06    0.38 
  18   2   3    4.83    0.44 
  20  -2   3    0.20    0.07 
 -20  -2  -3    0.21    0.07 
  20  -2   3    0.12    0.08 
 -20  -2  -3    0.20    0.07 
  20  -2   3    0.12    0.07 
 -20   2  -3    0.41    0.07 
  20   2   3    0.42    0.08 
  20   2   3    0.31    0.08 
 -22  -2  -3    2.87    0.22 
  22  -2   3    2.67    0.22 
  22  -2   3    2.84    0.23 
 -22  -2  -3    2.96    0.22 
  22   2   3    2.54    0.28 
  22   2   3    2.67    0.19 
  22   2   3    2.83    0.22 
 -22   2  -3    2.67    0.20 
 -22   2  -3    2.95    0.21 
  22   2   3    2.79    0.22 
 -24  -2  -3    1.37    0.14 
  24  -2   3    1.44    0.15 
  24  -2   3    1.47    0.15 
 -24  -2  -3    1.56    0.15 
 -24   2  -3    1.67    0.14 
 -24   2  -3    1.39    0.13 
  24   2   3    1.51    0.15 
  24   2   3    1.61    0.15 
  26  -2   3    0.45    0.08 
 -26  -2  -3    0.45    0.07 
  26  -2   3    0.53    0.10 
  26   2   3    0.41    0.07 
 -26   2  -3    0.58    0.08 
 -26   2  -3    0.65    0.08 
  26   2   3    0.58    0.09 
  28  -2   3    1.37    0.13 
 -28  -2  -3    1.42    0.12 
  28   2   3    1.44    0.13 
 -28   2  -3    1.54    0.12 
 -28   2  -3    1.33    0.11 
  28   2   3    1.37    0.12 
  33  -3  -3    0.04    0.04 
 -33  -3   3    0.03    0.04 
  33  -3  -3    0.01    0.04 
 -33   3   3   -0.01    0.03 
 -31  -3   3    0.00    0.04 
  31  -3  -3    0.03    0.05 
 -31  -3   3   -0.03    0.04 
  31  -3  -3    0.03    0.05 
  31   3  -3    0.00    0.05 
 -31   3   3    0.04    0.05 
  29  -3  -3    0.09    0.06 
 -29  -3   3    0.16    0.06 
  29  -3  -3    0.16    0.07 
 -29  -3   3    0.05    0.04 
 -29   3   3    0.12    0.06 
  29   3  -3    0.12    0.07 
 -29   3   3    0.17    0.06 
  27  -3  -3    1.43    0.16 
  27  -3  -3    1.45    0.16 
 -27  -3   3    1.38    0.14 
 -27  -3   3    1.66    0.16 
  27   3  -3    1.47    0.16 
 -27   3   3    1.47    0.14 
 -27   3   3    1.62    0.15 
 -25  -3   3    1.53    0.16 
 -25  -3   3    1.61    0.15 
  25  -3  -3    1.40    0.17 
  25  -3  -3    1.68    0.17 
 -25   3   3    1.62    0.15 
  25   3  -3    1.75    0.18 
  25   3  -3    1.36    0.16 
 -25   3   3    1.38    0.20 
 -25   3   3    1.53    0.15 
  23  -3  -3    5.46    0.38 
  23  -3  -3    5.24    0.37 
 -23  -3   3    4.86    0.35 
 -23  -3   3    5.37    0.36 
 -23   3   3    4.92    0.34 
  23   3  -3    4.97    0.37 
 -23   3   3    4.65    0.52 
 -23   3   3    4.85    0.31 
 -21  -3   3    1.04    0.17 
 -21  -3   3    1.37    0.15 
  21  -3  -3    0.92    0.15 
  21   3  -3    1.01    0.10 
 -21   3   3    1.31    0.19 
 -21   3   3    1.12    0.12 
  21   3  -3    1.18    0.14 
 -21   3   3    1.00    0.10 
 -19  -3   3    0.16    0.09 
 -19  -3   3    0.17    0.07 
  19  -3  -3    0.29    0.10 
 -19   3   3    0.14    0.09 
 -19   3   3    0.12    0.04 
 -19   3   3    0.11    0.05 
  19   3  -3    0.17    0.07 
  19   3  -3    0.12    0.04 
 -19   3   3    0.10    0.05 
 -17  -3   3    8.27    0.57 
 -17  -3   3    8.33    0.53 
 -17  -3   3    7.97    0.50 
  17  -3  -3    8.41    0.56 
  17   3  -3    7.87    0.53 
 -17   3   3    7.85    0.58 
 -17   3   3    7.56    0.52 
 -17   3   3    6.78    0.52 
  17   3  -3    8.57    0.49 
 -17   3   3    6.94    0.52 
 -15  -3   3    5.90    0.45 
 -15  -3   3    5.81    0.47 
 -15  -3   3    6.40    0.42 
 -15  -3   3    6.14    0.40 
  15  -3  -3    6.34    0.45 
 -15   3   3    5.68    0.40 
 -15   3   3    6.40    0.46 
  15   3  -3    5.96    0.42 
  15   3  -3    6.32    0.39 
 -15   3   3    6.03    0.42 
 -13  -3   3    1.56    0.19 
 -13  -3   3    1.80    0.17 
  13  -3  -3    1.68    0.18 
 -13  -3   3    1.71    0.19 
 -13  -3   3    1.83    0.16 
 -13   3   3    1.99    0.16 
  13   3  -3    2.16    0.17 
  13   3  -3    2.34    0.15 
 -13   3   3    2.39    0.21 
 -13   3   3    2.25    0.17 
 -11  -3   3    5.87    0.42 
 -11  -3   3    6.13    0.39 
 -11  -3   3    5.53    0.42 
  11  -3  -3    5.93    0.42 
 -11  -3   3    6.25    0.40 
  11   3  -3    5.98    0.37 
  11   3  -3    5.59    0.39 
 -11   3   3    5.71    0.42 
 -11   3   3    6.11    0.39 
  -9  -3   3    8.30    0.62 
  -9  -3   3    9.86    0.63 
  -9  -3   3    9.56    0.59 
  -9  -3   3    8.98    0.56 
  -9  -3   3    9.83    0.62 
   9  -3  -3    9.23    0.61 
  -9  -3   3    8.83    0.58 
   9   3  -3   10.06    0.57 
   9   3  -3    8.40    0.59 
  -9   3   3   10.06    0.61 
  -9   3   3    9.78    0.58 
  -7  -3   3    2.04    0.15 
  -7  -3   3    1.70    0.14 
  -7  -3   3    1.87    0.12 
  -7  -3   3    2.10    0.18 
  -7  -3   3    1.70    0.16 
  -7  -3   3    1.98    0.18 
  -7   3   3    1.73    0.13 
  -7   3   3    1.66    0.14 
   7   3  -3    1.75    0.13 
  -5  -3   3    5.94    0.39 
   5  -3  -3    6.54    0.41 
   5  -3  -3    6.41    0.42 
  -5  -3   3    6.55    0.39 
  -5  -3   3    6.38    0.37 
  -5  -3   3    6.34    0.43 
   5  -3  -3    5.33    0.40 
   5   3  -3    6.26    0.38 
   5   3  -3    5.37    0.42 
  -5   3   3    6.27    0.39 
  -5   3   3    5.77    0.39 
  -5   3   3    6.25    0.38 
   5   3  -3    5.64    0.39 
   3  -3  -3   31.33    1.88 
  -3  -3   3   29.21    1.86 
   3  -3  -3   31.73    1.87 
  -3  -3   3   30.67    1.86 
  -3  -3   3   32.50    1.84 
   3  -3  -3   32.07    1.89 
  -3  -3   3   32.95    1.91 
   3   3  -3   32.29    1.85 
   3   3  -3   29.50    1.86 
  -3   3   3   31.91    1.86 
  -3   3   3   30.23    1.85 
  -3   3   3   32.70    1.84 
  -1  -3   3   23.74    1.51 
  -1  -3   3   25.35    1.52 
   1  -3  -3   24.01    1.54 
  -1  -3   3   26.18    1.49 
  -1  -3   3   24.34    1.55 
   1  -3  -3   25.62    1.52 
   1  -3  -3   26.53    1.55 
  -1   3   3   23.82    1.50 
   1   3  -3   27.06    1.50 
   1   3  -3   26.00    1.56 
  -1   3   3   27.27    1.49 
  -1   3   3   25.87    1.52 
   1   3  -3   24.90    1.52 
   1  -3   3   26.04    1.60 
  -1  -3  -3   23.87    1.57 
  -1  -3  -3   27.59    1.59 
   1  -3   3   24.68    1.54 
  -1  -3  -3   27.79    1.59 
   1  -3   3   24.59    1.55 
   1  -3   3   27.01    1.57 
   1  -3   3   27.66    1.53 
  -1   3  -3   28.30    1.60 
   1   3   3   26.19    1.53 
  -1   3  -3   27.06    1.53 
  -1   3  -3   22.35    1.55 
   1   3   3   25.16    1.54 
   3  -3   3   18.10    1.07 
   3  -3   3   17.60    1.09 
   3  -3   3   17.08    1.11 
  -3  -3  -3   17.89    1.10 
  -3  -3  -3   19.08    1.11 
  -3   3  -3   17.87    1.11 
   3   3   3   16.66    1.06 
   3   3   3   17.46    1.04 
  -3   3  -3   17.65    1.05 
  -3   3  -3   16.30    1.07 
   5  -3   3    6.45    0.49 
  -5  -3  -3    6.13    0.48 
  -5  -3  -3    6.81    0.49 
   5  -3   3    6.67    0.47 
   5  -3   3    6.38    0.42 
  -5   3  -3    6.38    0.46 
   5   3   3    6.60    0.44 
  -5   3  -3    7.65    0.43 
   5   3   3    7.36    0.43 
  -5   3  -3    8.06    0.51 
   7  -3   3    4.82    0.32 
   7  -3   3    4.47    0.40 
  -7  -3  -3    5.34    0.40 
  -7  -3  -3    4.74    0.39 
   7  -3   3    5.03    0.38 
   7  -3   3    5.01    0.36 
  -7   3  -3    5.54    0.37 
  -7   3  -3    5.57    0.41 
   7   3   3    5.66    0.34 
   7   3   3    4.77    0.35 
  -7   3  -3    5.58    0.33 
   9  -3   3    5.08    0.39 
  -9  -3  -3    5.25    0.39 
   9  -3   3    4.75    0.35 
   9  -3   3    4.65    0.40 
  -9  -3  -3    5.08    0.38 
   9  -3   3    4.39    0.30 
   9   3   3    5.06    0.33 
  -9   3  -3    4.88    0.31 
  -9   3  -3    4.88    0.40 
  -9   3  -3    4.81    0.35 
   9   3   3    4.39    0.34 
   9   3   3    4.29    0.32 
  11  -3   3    6.24    0.47 
  11  -3   3    5.85    0.42 
 -11  -3  -3    6.34    0.47 
  11  -3   3    5.14    0.38 
 -11  -3  -3    6.38    0.46 
  11  -3   3    5.73    0.50 
  11   3   3    6.46    0.41 
  11   3   3    5.79    0.40 
 -11   3  -3    6.02    0.49 
 -11   3  -3    5.88    0.38 
 -11   3  -3    6.24    0.43 
  11   3   3    5.94    0.42 
  13  -3   3   16.22    1.11 
 -13  -3  -3   15.93    1.08 
 -13  -3  -3   17.78    1.09 
  13  -3   3   15.66    1.04 
  13  -3   3   15.38    1.14 
  13   3   3   18.09    1.04 
 -13   3  -3   16.11    0.99 
  13   3   3   16.99    1.05 
  13   3   3   14.98    1.01 
 -13   3  -3   16.85    1.14 
 -13   3  -3   17.75    1.05 
  15  -3   3   26.65    1.49 
  15  -3   3   23.39    1.57 
  15  -3   3   20.10    1.60 
  15   3   3   26.00    1.45 
  15   3   3   22.88    1.50 
 -15   3  -3   20.98    1.58 
  15   3   3   27.31    1.50 
  15   3   3   22.61    1.48 
 -15   3  -3   27.34    1.50 
  17  -3   3    0.25    0.11 
 -17   3  -3    0.23    0.12 
 -17   3  -3    0.44    0.10 
  17   3   3    0.48    0.07 
  17   3   3    0.49    0.13 
  17   3   3    0.56    0.12 
  19  -3   3    3.11    0.26 
 -19  -3  -3    3.20    0.27 
  19  -3   3    3.01    0.32 
  19  -3   3    2.86    0.27 
 -19  -3  -3    3.55    0.27 
 -19  -3  -3    3.49    0.29 
 -19   3  -3    4.18    0.26 
 -19   3  -3    3.51    0.24 
 -19   3  -3    3.92    0.27 
  19   3   3    4.07    0.24 
  19   3   3    4.00    0.27 
  19   3   3    3.59    0.27 
  19   3   3    4.36    0.26 
 -21  -3  -3    3.00    0.22 
  21  -3   3    2.73    0.23 
  21  -3   3    2.84    0.22 
 -21  -3  -3    2.77    0.24 
 -21  -3  -3    3.01    0.22 
 -21   3  -3    2.55    0.19 
  21   3   3    2.44    0.21 
  21   3   3    2.58    0.18 
  21   3   3    2.28    0.22 
  21   3   3    2.47    0.21 
 -21   3  -3    2.72    0.20 
 -23  -3  -3    1.35    0.15 
  23  -3   3    1.38    0.16 
  23  -3   3    1.39    0.15 
 -23  -3  -3    1.62    0.15 
 -23   3  -3    1.61    0.14 
  23   3   3    1.45    0.12 
  23   3   3    1.70    0.15 
  23   3   3    1.59    0.15 
 -23   3  -3    1.56    0.13 
  25  -3   3    0.97    0.11 
 -25  -3  -3    0.78    0.10 
 -25  -3  -3    0.85    0.11 
  25  -3   3    0.84    0.12 
  25   3   3    0.94    0.11 
  25   3   3    1.08    0.12 
 -25   3  -3    0.87    0.09 
 -25   3  -3    1.04    0.11 
 -27  -3  -3    0.44    0.07 
  27  -3   3    0.44    0.08 
  27  -3   3    0.43    0.07 
  27   3   3    0.41    0.07 
 -27   3  -3    0.45    0.06 
 -27   3  -3    0.45    0.06 
  27   3   3    0.52    0.08 
  29  -3   3    0.23    0.05 
 -29  -3  -3    0.28    0.05 
  29  -3   3    0.32    0.07 
  29   3   3    0.30    0.05 
 -29   3  -3    0.29    0.04 
  32  -4  -3    0.23    0.05 
 -32  -4   3    0.24    0.05 
  32  -4  -3    0.21    0.05 
 -32   4   3    0.18    0.04 
  32   4  -3    0.21    0.05 
 -30  -4   3    0.07    0.04 
  30  -4  -3    0.12    0.05 
 -30  -4   3    0.05    0.05 
  30  -4  -3    0.09    0.05 
 -30   4   3    0.11    0.05 
  30   4  -3    0.05    0.05 
 -30   4   3    0.12    0.05 
 -28  -4   3    0.41    0.07 
  28  -4  -3    0.17    0.07 
  28  -4  -3    0.45    0.09 
 -28  -4   3    0.34    0.08 
  28   4  -3    0.32    0.08 
 -28   4   3    0.19    0.06 
 -28   4   3    0.33    0.07 
 -26  -4   3    0.35    0.08 
  26  -4  -3    0.29    0.09 
 -26  -4   3    0.42    0.08 
  26  -4  -3    0.48    0.09 
 -26   4   3    0.55    0.08 
 -26   4   3    0.52    0.08 
  26   4  -3    0.86    0.12 
 -24  -4   3    1.54    0.16 
  24  -4  -3    2.06    0.20 
  24  -4  -3    1.57    0.18 
 -24  -4   3    1.92    0.18 
 -24  -4   3    1.73    0.19 
 -24   4   3    1.68    0.13 
  24   4  -3    2.05    0.18 
 -24   4   3    1.85    0.16 
  24   4  -3    1.63    0.18 
  24   4  -3    1.99    0.19 
 -22  -4   3    9.91    0.66 
 -22  -4   3    9.30    0.66 
  22  -4  -3   10.86    0.68 
 -22  -4   3   10.72    0.67 
  22  -4  -3   10.29    0.66 
  22   4  -3   10.12    0.68 
 -22   4   3   10.06    0.64 
  22   4  -3   10.99    0.69 
  22   4  -3   11.06    0.67 
 -22   4   3   10.56    0.64 
 -22   4   3   10.26    0.62 
  20  -4  -3    4.73    0.39 
 -20  -4   3    4.79    0.38 
 -20  -4   3    4.92    0.42 
 -20   4   3    4.94    0.43 
 -20   4   3    5.04    0.37 
 -20   4   3    4.38    0.34 
 -20   4   3    5.29    0.32 
  20   4  -3    5.59    0.38 
 -18  -4   3    1.12    0.14 
 -18  -4   3    1.13    0.16 
  18  -4  -3    1.23    0.16 
  18   4  -3    1.08    0.14 
  18   4  -3    0.98    0.10 
 -18   4   3    0.98    0.09 
 -18   4   3    0.86    0.12 
 -18   4   3    0.79    0.15 
 -18   4   3    0.91    0.12 
  16  -4  -3    3.19    0.28 
 -16  -4   3    3.24    0.26 
 -16  -4   3    3.30    0.30 
 -16   4   3    3.00    0.29 
  16   4  -3    3.36    0.26 
 -16   4   3    2.91    0.21 
 -16   4   3    3.19    0.24 
  16   4  -3    3.32    0.22 
 -16   4   3    3.06    0.25 
  14  -4  -3    1.31    0.15 
 -14  -4   3    0.92    0.14 
 -14  -4   3    1.04    0.12 
 -14  -4   3    1.21    0.16 
 -14   4   3    0.89    0.13 
 -14   4   3    0.83    0.10 
 -14   4   3    1.10    0.12 
  14   4  -3    1.01    0.12 
  14   4  -3    0.98    0.09 
 -12  -4   3    0.60    0.12 
 -12   4   3    0.82    0.09 
 -12   4   3    0.90    0.12 
  12   4  -3    0.94    0.08 
 -12   4   3    0.82    0.09 
  10  -4  -3   26.68    1.63 
 -10  -4   3   27.24    1.64 
 -10  -4   3   28.08    1.60 
 -10   4   3   26.35    1.58 
  10   4  -3   26.48    1.57 
  10   4  -3   25.30    1.59 
 -10   4   3   25.96    1.61 
  -8  -4   3   31.15    1.77 
  -8  -4   3   28.87    1.74 
  -8  -4   3   30.34    1.81 
   8  -4  -3   31.58    1.80 
   8   4  -3   27.50    1.76 
  -8   4   3   26.32    1.76 
  -8   4   3   30.54    1.75 
   8   4  -3   29.91    1.74 
   6  -4  -3    0.31    0.09 
  -6  -4   3    0.16    0.08 
   6  -4  -3    0.25    0.08 
  -6  -4   3    0.27    0.07 
  -6  -4   3    0.21    0.09 
  -6  -4   3    0.25    0.05 
  -4  -4   3   45.97    2.78 
  -4  -4   3   50.04    2.85 
   4  -4  -3   49.24    2.83 
   4  -4  -3   44.09    2.81 
  -4  -4   3   46.81    2.85 
   4  -4  -3   50.24    2.82 
  -4  -4   3   47.33    2.80 
   4   4  -3   46.95    2.78 
  -4   4   3   48.27    2.77 
  -4   4   3   47.39    2.80 
   4   4  -3   46.39    2.80 
  -2  -4   3  116.93    6.85 
   2  -4  -3  118.08    6.90 
  -2  -4   3  112.83    6.92 
   2  -4  -3  120.49    6.88 
  -2  -4   3  110.56    6.86 
   2  -4  -3  115.05    6.90 
  -2   4   3  122.96    6.84 
  -2   4   3  121.38    6.87 
   2   4  -3  118.91    6.85 
   2   4  -3  121.40    6.99 
   2   4  -3  116.14    6.87 
   0  -4  -3   33.12    2.01 
   0  -4   3   32.51    2.05 
   0  -4  -3   35.30    2.05 
   0  -4  -3   34.24    2.05 
   0   4   3   34.32    1.97 
   0   4  -3   33.96    1.99 
   0   4  -3   34.77    2.06 
   0   4  -3   32.30    2.01 
   2  -4   3    3.47    0.26 
  -2  -4  -3    3.62    0.28 
   2  -4   3    3.22    0.27 
  -2   4  -3    2.91    0.21 
   2   4   3    2.93    0.20 
  -2   4  -3    2.83    0.27 
  -2   4  -3    2.75    0.24 
  -2   4  -3    2.80    0.26 
  -4  -4  -3    0.12    0.07 
   4  -4   3    0.17    0.05 
   4  -4   3    0.08    0.06 
   4  -4   3    0.10    0.06 
  -4  -4  -3    0.24    0.10 
  -6  -4  -3   39.09    2.21 
   6  -4   3   34.19    2.20 
   6  -4   3   36.77    2.14 
  -6  -4  -3   38.40    2.21 
   6  -4   3   38.25    2.20 
   6   4   3   30.89    2.14 
  -6   4  -3   36.49    2.13 
  -6   4  -3   32.49    2.16 
  -6   4  -3   37.39    2.21 
   6   4   3   36.23    2.12 
   8  -4   3   10.72    0.69 
   8  -4   3    9.72    0.62 
  -8  -4  -3   10.33    0.69 
   8  -4   3    8.83    0.72 
  -8  -4  -3   10.17    0.69 
   8   4   3    8.58    0.60 
  -8   4  -3   10.21    0.61 
  -8   4  -3   10.57    0.71 
   8   4   3   10.51    0.62 
  -8   4  -3    9.52    0.65 
   8   4   3    9.13    0.63 
 -10  -4  -3   32.10    1.86 
  10  -4   3   32.20    1.88 
 -10  -4  -3   30.43    1.86 
  10  -4   3   28.92    1.78 
  10   4   3   26.87    1.80 
  10   4   3   27.67    1.77 
 -10   4  -3   29.61    1.89 
 -10   4  -3   30.43    1.77 
  10   4   3   30.34    1.78 
 -10   4  -3   29.48    1.82 
  12  -4   3    2.84    0.23 
 -12  -4  -3    3.49    0.30 
  12  -4   3    2.96    0.31 
 -12  -4  -3    3.15    0.30 
  12   4   3    3.17    0.24 
 -12   4  -3    3.25    0.22 
 -12   4  -3    3.08    0.33 
  12   4   3    2.50    0.25 
 -12   4  -3    3.07    0.27 
  12   4   3    3.19    0.25 
 -14  -4  -3    1.32    0.19 
  14   4   3    1.17    0.15 
 -14   4  -3    1.23    0.11 
  14   4   3    1.52    0.12 
  14   4   3    1.10    0.15 
 -14   4  -3    1.00    0.19 
  14   4   3    1.48    0.15 
  16  -4   3    1.07    0.20 
  16   4   3    1.07    0.14 
  16   4   3    1.68    0.17 
  16   4   3    1.24    0.17 
  16   4   3    1.50    0.13 
 -16   4  -3    1.25    0.22 
 -16   4  -3    1.39    0.17 
 -18  -4  -3    4.50    0.32 
 -18  -4  -3    4.59    0.32 
 -18  -4  -3    4.28    0.34 
 -18  -4  -3    4.70    0.32 
  18  -4   3    4.74    0.33 
 -18   4  -3    4.50    0.30 
 -18   4  -3    4.13    0.29 
  18   4   3    4.09    0.30 
  18   4   3    4.23    0.28 
 -18   4  -3    4.02    0.33 
  18   4   3    4.52    0.35 
  18   4   3    4.48    0.30 
 -20  -4  -3    1.28    0.14 
 -20  -4  -3    0.92    0.13 
 -20  -4  -3    1.04    0.19 
  20  -4   3    0.98    0.14 
 -20  -4  -3    1.27    0.16 
  20  -4   3    1.22    0.14 
 -20   4  -3    1.14    0.12 
 -20   4  -3    1.15    0.12 
 -20   4  -3    0.94    0.10 
  20   4   3    0.92    0.12 
  20   4   3    1.06    0.10 
  20   4   3    1.18    0.12 
  20   4   3    1.09    0.13 
  22  -4   3    0.40    0.08 
 -22  -4  -3    0.48    0.09 
  22  -4   3    0.29    0.08 
 -22  -4  -3    0.45    0.09 
 -22  -4  -3    0.33    0.09 
  22   4   3    0.43    0.08 
 -22   4  -3    0.52    0.08 
  22   4   3    0.48    0.08 
 -22   4  -3    0.51    0.07 
  22   4   3    0.47    0.06 
  22   4   3    0.44    0.08 
 -24  -4  -3    2.88    0.23 
  24  -4   3    3.24    0.24 
  24  -4   3    2.84    0.23 
 -24  -4  -3    3.10    0.23 
  24   4   3    3.38    0.24 
 -24   4  -3    3.13    0.21 
  24   4   3    3.05    0.20 
 -24   4  -3    3.31    0.22 
  26  -4   3    0.68    0.09 
  26  -4   3    0.72    0.10 
 -26  -4  -3    0.68    0.09 
 -26  -4  -3    0.64    0.09 
 -26   4  -3    0.72    0.08 
 -26   4  -3    0.81    0.08 
  26   4   3    0.75    0.10 
  28  -4   3    0.42    0.06 
 -28  -4  -3    0.45    0.06 
  28  -4   3    0.56    0.07 
 -28   4  -3    0.52    0.06 
  28   4   3    0.64    0.07 
 -28   4  -3    0.55    0.06 
 -31  -5   3    0.04    0.04 
  31  -5  -3    0.01    0.04 
  31  -5  -3   -0.03    0.04 
 -31  -5   3    0.01    0.03 
 -31   5   3   -0.02    0.03 
  31   5  -3    0.02    0.04 
 -29  -5   3    0.40    0.06 
  29  -5  -3    0.39    0.07 
  29  -5  -3    0.48    0.09 
 -29  -5   3    0.45    0.08 
 -29   5   3    0.38    0.06 
 -29   5   3    0.42    0.07 
  29   5  -3    0.38    0.08 
 -27  -5   3    2.27    0.19 
  27  -5  -3    2.17    0.18 
 -27  -5   3    1.92    0.17 
  27  -5  -3    2.14    0.19 
 -27   5   3    1.89    0.16 
  27   5  -3    2.06    0.19 
  27   5  -3    1.82    0.17 
 -27   5   3    1.98    0.16 
  25  -5  -3    1.84    0.18 
 -25  -5   3    2.08    0.19 
  25  -5  -3    2.02    0.20 
 -25  -5   3    1.83    0.18 
 -25   5   3    2.28    0.17 
  25   5  -3    2.34    0.19 
  25   5  -3    2.17    0.20 
 -25   5   3    2.20    0.15 
 -23  -5   3    4.05    0.31 
  23  -5  -3    3.78    0.32 
  23  -5  -3    4.28    0.31 
 -23  -5   3    3.99    0.32 
 -23  -5   3    4.08    0.31 
  23   5  -3    4.52    0.32 
 -23   5   3    4.62    0.30 
 -23   5   3    4.38    0.29 
 -23   5   3    4.56    0.28 
  23   5  -3    4.07    0.33 
  23   5  -3    4.77    0.33 
  21  -5  -3    0.03    0.07 
  21  -5  -3    0.11    0.07 
 -21  -5   3    0.03    0.06 
 -21  -5   3    0.25    0.08 
 -21  -5   3    0.05    0.07 
  21   5  -3    0.19    0.08 
 -21   5   3    0.10    0.06 
 -21   5   3    0.16    0.05 
  21   5  -3    0.10    0.05 
 -21   5   3    0.11    0.04 
  21   5  -3    0.07    0.07 
  21   5  -3    0.07    0.06 
 -19  -5   3    1.38    0.20 
 -19  -5   3    1.44    0.17 
  19  -5  -3    1.36    0.19 
 -19   5   3    1.57    0.21 
 -19   5   3    1.82    0.13 
  19   5  -3    1.64    0.14 
  19   5  -3    1.58    0.18 
 -19   5   3    1.31    0.16 
 -19   5   3    1.81    0.17 
 -17  -5   3    0.32    0.11 
  17  -5  -3    0.43    0.13 
 -17  -5   3    0.47    0.11 
  17   5  -3    0.43    0.07 
 -17   5   3    0.38    0.12 
 -17   5   3    0.36    0.09 
 -17   5   3    0.54    0.09 
 -17   5   3    0.48    0.07 
 -15  -5   3    3.12    0.30 
 -15  -5   3    3.64    0.32 
  15  -5  -3    3.36    0.30 
 -15  -5   3    3.22    0.27 
 -15   5   3    3.34    0.25 
  15   5  -3    3.31    0.23 
 -15   5   3    2.84    0.21 
 -15   5   3    3.21    0.29 
 -15   5   3    3.34    0.26 
  13  -5  -3    0.29    0.11 
 -13  -5   3    0.23    0.07 
 -13  -5   3    0.38    0.13 
 -13  -5   3    0.37    0.12 
 -13   5   3    0.27    0.07 
 -13   5   3    0.28    0.06 
  13   5  -3    0.40    0.13 
 -13   5   3    0.31    0.10 
  13   5  -3    0.24    0.05 
  11  -5  -3    5.06    0.40 
 -11  -5   3    5.57    0.41 
 -11  -5   3    5.23    0.41 
 -11  -5   3    5.36    0.37 
  11   5  -3    5.02    0.36 
 -11   5   3    4.60    0.33 
  11   5  -3    5.07    0.33 
  11   5  -3    4.47    0.37 
 -11   5   3    5.38    0.35 
  -9  -5   3    1.52    0.18 
  -9  -5   3    1.36    0.17 
   9  -5  -3    1.39    0.16 
  -9  -5   3    1.35    0.13 
  -9   5   3    1.01    0.09 
   9   5  -3    1.16    0.14 
  -9   5   3    1.23    0.11 
   9   5  -3    1.19    0.13 
   9   5  -3    1.30    0.12 
   9   5  -3    1.28    0.10 
  -7  -5   3   19.55    1.24 
   7  -5  -3   21.01    1.22 
  -7  -5   3   19.77    1.19 
  -7  -5   3   19.73    1.23 
   7   5  -3   18.51    1.18 
   7   5  -3   19.20    1.16 
   7   5  -3   17.17    1.19 
  -7   5   3   20.41    1.16 
   5  -5  -3    0.12    0.06 
  -5  -5   3    0.20    0.06 
   5  -5  -3    0.01    0.05 
  -5  -5   3    0.27    0.09 
  -5  -5   3    0.10    0.08 
   5   5  -3    0.03    0.03 
   5   5  -3    0.03    0.04 
  -3  -5   3   17.81    1.12 
   3  -5  -3   18.21    1.10 
   3  -5  -3   18.23    1.09 
   3  -5  -3   15.59    1.08 
   3   5  -3   17.50    1.06 
  -3   5   3   17.52    1.07 
   3   5  -3   17.01    1.04 
   1  -5  -3   29.77    1.81 
   1  -5  -3   28.84    1.78 
  -1  -5   3   31.38    1.84 
   1  -5  -3   30.37    1.81 
   1   5  -3   30.47    1.82 
   1   5  -3   27.62    1.76 
   1   5  -3   28.11    1.74 
  -1  -5  -3   15.06    0.93 
  -1  -5  -3   15.57    0.97 
  -1  -5  -3   13.79    0.96 
   1  -5   3   14.99    0.98 
  -1   5  -3   15.08    0.89 
  -1   5  -3   14.54    0.96 
  -1   5  -3   14.49    0.92 
  -3  -5  -3    0.69    0.12 
  -3  -5  -3    0.54    0.11 
   3  -5   3    0.50    0.12 
  -3   5  -3    0.50    0.07 
  -3   5  -3    0.42    0.07 
  -3   5  -3    0.38    0.11 
   3   5   3    0.48    0.05 
   5  -5   3    2.38    0.25 
  -5  -5  -3    2.71    0.26 
   5  -5   3    2.69    0.24 
  -5  -5  -3    2.70    0.25 
  -5   5  -3    2.41    0.24 
  -5   5  -3    2.36    0.18 
   5   5   3    2.42    0.17 
  -5   5  -3    2.00    0.24 
   7  -5   3    2.85    0.26 
  -7  -5  -3    2.65    0.27 
  -7  -5  -3    2.57    0.26 
  -7   5  -3    2.66    0.19 
   7   5   3    2.79    0.19 
   7   5   3    2.38    0.21 
  -7   5  -3    2.70    0.27 
   7   5   3    2.13    0.19 
   9  -5   3    3.71    0.35 
  -9  -5  -3    3.80    0.35 
  -9  -5  -3    3.87    0.36 
   9   5   3    3.70    0.30 
  -9   5  -3    4.26    0.38 
   9   5   3    4.17    0.28 
  -9   5  -3    4.09    0.33 
  -9   5  -3    4.13    0.28 
   9   5   3    3.87    0.28 
  11  -5   3    1.65    0.21 
 -11  -5  -3    1.55    0.21 
 -11  -5  -3    1.88    0.22 
  11   5   3    1.46    0.15 
 -11   5  -3    1.40    0.21 
  11   5   3    1.43    0.14 
 -11   5  -3    1.47    0.18 
 -11   5  -3    1.38    0.13 
  11   5   3    1.23    0.16 
 -13  -5  -3    3.61    0.35 
  13  -5   3    3.77    0.37 
 -13   5  -3    3.75    0.32 
  13   5   3    3.41    0.27 
 -13   5  -3    3.81    0.39 
  13   5   3    3.10    0.29 
  13   5   3    4.30    0.29 
 -13   5  -3    3.74    0.26 
  13   5   3    3.26    0.25 
 -15  -5  -3    0.41    0.13 
  15  -5   3    0.24    0.13 
 -15  -5  -3    0.15    0.10 
 -15  -5  -3    0.20    0.11 
 -15  -5  -3    0.29    0.12 
 -15  -5  -3    0.26    0.09 
  15  -5   3    0.25    0.12 
  15   5   3    0.18    0.10 
 -15   5  -3    0.16    0.10 
  15   5   3    0.23    0.06 
 -15   5  -3    0.11    0.05 
  15   5   3    0.16    0.09 
 -15   5  -3    0.08    0.04 
  15   5   3    0.19    0.08 
 -17  -5  -3    1.27    0.17 
 -17  -5  -3    1.23    0.14 
  17  -5   3    1.24    0.15 
 -17  -5  -3    1.27    0.15 
 -17  -5  -3    1.23    0.15 
 -17   5  -3    1.09    0.12 
 -17   5  -3    0.95    0.11 
  17   5   3    1.28    0.12 
  17   5   3    1.00    0.10 
  17   5   3    1.27    0.16 
 -17   5  -3    1.13    0.16 
  19  -5   3    1.59    0.16 
 -19  -5  -3    1.51    0.16 
 -19  -5  -3    1.53    0.16 
 -19  -5  -3    1.59    0.16 
 -19  -5  -3    1.56    0.19 
  19   5   3    1.53    0.12 
 -19   5  -3    1.27    0.16 
 -19   5  -3    1.49    0.14 
 -19   5  -3    1.47    0.13 
  19   5   3    1.57    0.18 
  19   5   3    1.58    0.14 
 -21  -5  -3    0.36    0.10 
 -21  -5  -3    0.56    0.09 
 -21  -5  -3    0.54    0.09 
  21  -5   3    0.62    0.10 
  21   5   3    0.36    0.08 
  21   5   3    0.34    0.07 
  21   5   3    0.36    0.06 
 -21   5  -3    0.35    0.06 
 -21   5  -3    0.38    0.07 
 -23  -5  -3    1.82    0.19 
  23  -5   3    1.89    0.17 
 -23  -5  -3    1.96    0.17 
 -23  -5  -3    1.98    0.17 
 -23   5  -3    1.97    0.15 
  23   5   3    1.89    0.19 
 -23   5  -3    1.82    0.14 
  23   5   3    1.98    0.14 
  23   5   3    1.94    0.16 
 -25  -5  -3    0.48    0.08 
 -25  -5  -3    0.84    0.10 
  25  -5   3    0.79    0.09 
  25   5   3    0.60    0.06 
 -25   5  -3    0.66    0.08 
  25   5   3    0.64    0.09 
 -25   5  -3    0.60    0.07 
 -27  -5  -3    0.05    0.04 
 -27  -5  -3    0.08    0.04 
  27  -5   3    0.09    0.04 
 -27   5  -3    0.06    0.03 
 -27   5  -3    0.13    0.03 
  27   5   3    0.09    0.04 
 -30  -6   3    0.30    0.05 
 -30  -6   3    0.42    0.06 
 -30  -6   3    0.33    0.06 
  30  -6  -3    0.41    0.07 
 -30   6   3    0.59    0.07 
 -30   6   3    0.36    0.05 
  30   6  -3    0.55    0.08 
 -28  -6   3    1.23    0.13 
 -28  -6   3    1.26    0.13 
 -28  -6   3    1.14    0.12 
  28  -6  -3    1.26    0.14 
 -28   6   3    1.25    0.11 
 -28   6   3    1.43    0.12 
  28   6  -3    1.34    0.13 
  28   6  -3    1.38    0.13 
 -26  -6   3    5.83    0.38 
 -26  -6   3    5.24    0.36 
  26  -6  -3    5.81    0.39 
  26   6  -3    5.60    0.39 
 -26   6   3    5.29    0.34 
 -26   6   3    5.50    0.36 
  26   6  -3    5.36    0.37 
 -24  -6   3    2.99    0.24 
  24  -6  -3    2.81    0.24 
 -24  -6   3    3.03    0.23 
  24   6  -3    2.97    0.24 
 -24   6   3    2.63    0.21 
 -24   6   3    2.87    0.19 
  24   6  -3    2.54    0.22 
 -22  -6   3    2.21    0.20 
 -22  -6   3    1.97    0.21 
  22  -6  -3    1.91    0.21 
 -22  -6   3    1.89    0.19 
  22   6  -3    2.09    0.16 
  22   6  -3    2.37    0.20 
  22   6  -3    2.48    0.21 
 -22   6   3    2.39    0.16 
 -22   6   3    2.44    0.17 
 -20  -6   3    2.47    0.23 
 -20  -6   3    2.54    0.24 
  20  -6  -3    2.58    0.25 
  20  -6  -3    2.67    0.22 
 -20  -6   3    2.51    0.23 
  20   6  -3    2.88    0.25 
 -20   6   3    2.85    0.24 
  20   6  -3    3.13    0.24 
  20   6  -3    2.96    0.20 
 -20   6   3    3.20    0.21 
 -20   6   3    2.90    0.19 
 -18  -6   3    1.81    0.18 
  18  -6  -3    1.93    0.20 
 -18  -6   3    1.79    0.19 
 -18  -6   3    1.89    0.19 
  18  -6  -3    1.85    0.17 
 -18   6   3    2.06    0.19 
 -18   6   3    2.08    0.15 
  18   6  -3    1.94    0.15 
  18   6  -3    1.97    0.18 
  18   6  -3    1.76    0.19 
 -16  -6   3    0.17    0.11 
 -16  -6   3    0.18    0.10 
 -16  -6   3    0.09    0.06 
  16  -6  -3    0.21    0.11 
  16   6  -3    0.28    0.06 
  16   6  -3    0.14    0.05 
 -16   6   3    0.26    0.05 
 -16   6   3    0.19    0.07 
 -14  -6   3    6.22    0.47 
 -14  -6   3    5.24    0.40 
  14  -6  -3    5.21    0.44 
 -14  -6   3    5.70    0.46 
  14   6  -3    5.29    0.36 
 -14   6   3    5.82    0.38 
 -14   6   3    4.96    0.34 
  14   6  -3    5.72    0.51 
  14   6  -3    5.36    0.37 
 -12  -6   3   12.24    0.76 
 -12  -6   3   12.52    0.82 
  12  -6  -3   11.05    0.80 
 -12  -6   3   12.52    0.82 
 -12   6   3   12.20    0.73 
  12   6  -3   10.57    0.71 
 -12   6   3   11.59    0.72 
  12   6  -3   11.20    0.75 
  12   6  -3   10.88    0.77 
  12   6  -3   11.04    0.71 
 -10  -6   3   22.00    1.30 
 -10  -6   3   20.34    1.23 
  10  -6  -3   19.63    1.27 
 -10  -6   3   21.02    1.29 
  10   6  -3   18.66    1.18 
 -10   6   3   19.39    1.20 
  10   6  -3   19.82    1.24 
  10   6  -3   18.37    1.21 
 -10   6   3   18.73    1.18 
  10   6  -3   19.81    1.23 
  -8  -6   3   24.00    1.50 
   8  -6  -3   23.96    1.48 
  -8  -6   3   22.26    1.44 
  -8  -6   3   22.59    1.49 
   8   6  -3   23.38    1.43 
   8   6  -3   23.57    1.40 
   8   6  -3   23.83    1.45 
  -8   6   3   24.70    1.41 
  -6  -6   3   29.32    2.00 
  -6  -6   3   33.97    2.02 
   6  -6  -3   34.78    1.99 
   6   6  -3   32.17    1.96 
   6   6  -3   30.35    1.92 
   6   6  -3   33.51    1.95 
  -6   6   3   33.20    1.91 
  -4  -6   3   34.88    2.02 
   4  -6  -3   34.16    1.97 
   4  -6  -3   32.34    1.97 
   4   6  -3   29.48    1.91 
   4   6  -3   33.41    1.93 
   4   6  -3   29.42    1.94 
   2  -6  -3    1.61    0.17 
  -2  -6   3    1.32    0.19 
   2  -6  -3    1.55    0.16 
   2   6  -3    1.31    0.13 
   2   6  -3    1.08    0.11 
   2   6  -3    1.05    0.13 
   0  -6  -3    1.28    0.16 
   0  -6  -3    1.33    0.14 
   0   6  -3    1.18    0.12 
   0   6  -3    1.16    0.11 
   0   6  -3    1.35    0.17 
   0   6  -3    1.10    0.13 
   2  -6   3    4.64    0.39 
  -2  -6  -3    4.03    0.36 
  -2  -6  -3    4.61    0.38 
  -2   6  -3    4.76    0.37 
  -2   6  -3    4.32    0.32 
  -2   6  -3    4.36    0.30 
  -2   6  -3    4.20    0.32 
  -4  -6  -3   16.61    1.07 
  -4  -6  -3   16.79    1.08 
  -4   6  -3   14.88    0.99 
  -4   6  -3   16.36    1.06 
  -4   6  -3   15.85    0.98 
   4   6   3   15.84    0.95 
  -6  -6  -3   12.78    0.91 
  -6  -6  -3   13.61    0.92 
  -6   6  -3   13.59    0.92 
  -6   6  -3   13.69    0.85 
  -6   6  -3   13.50    0.82 
   6   6   3   12.62    0.80 
   8  -6   3    9.52    0.68 
  -8  -6  -3    9.05    0.69 
  -8  -6  -3    9.74    0.69 
   8   6   3    9.49    0.58 
  -8   6  -3    9.46    0.69 
  -8   6  -3    9.30    0.59 
  -8   6  -3    8.37    0.56 
   8   6   3    8.89    0.57 
 -10  -6  -3    5.12    0.46 
  10  -6   3    5.45    0.47 
 -10  -6  -3    5.84    0.47 
  10   6   3    4.78    0.48 
 -10   6  -3    5.85    0.49 
 -10   6  -3    5.47    0.37 
  10   6   3    5.36    0.37 
  10   6   3    5.55    0.37 
 -12  -6  -3   22.04    1.56 
  12  -6   3   23.79    1.58 
 -12  -6  -3   27.58    1.57 
  12   6   3   21.75    1.55 
  12   6   3   23.87    1.45 
 -12   6  -3   22.34    1.59 
  12   6   3   26.26    1.46 
 -12   6  -3   23.72    1.44 
 -12   6  -3   24.05    1.51 
 -14  -6  -3    3.83    0.28 
 -14  -6  -3    3.87    0.28 
  14  -6   3    3.92    0.28 
 -14  -6  -3    3.42    0.27 
  14  -6   3    4.23    0.37 
 -14   6  -3    3.29    0.31 
  14   6   3    3.57    0.28 
 -14   6  -3    3.10    0.24 
 -14   6  -3    3.00    0.25 
 -14   6  -3    3.45    0.25 
  14   6   3    3.47    0.24 
 -16  -6  -3    6.34    0.46 
 -16  -6  -3    6.74    0.46 
 -16  -6  -3    6.90    0.49 
  16  -6   3    6.97    0.46 
 -16  -6  -3    6.86    0.46 
  16   6   3    7.02    0.43 
 -16   6  -3    6.19    0.49 
 -16   6  -3    6.59    0.43 
  16   6   3    7.01    0.48 
 -16   6  -3    6.98    0.44 
 -18  -6  -3    0.18    0.08 
  18  -6   3    0.22    0.08 
 -18  -6  -3    0.18    0.08 
 -18  -6  -3    0.25    0.08 
 -18  -6  -3    0.21    0.10 
 -18   6  -3    0.12    0.05 
  18   6   3    0.15    0.04 
  18   6   3    0.16    0.08 
 -18   6  -3    0.10    0.08 
 -18   6  -3    0.20    0.05 
  18   6   3    0.13    0.05 
  20  -6   3    1.14    0.15 
 -20  -6  -3    1.41    0.16 
 -20  -6  -3    1.34    0.18 
 -20  -6  -3    1.17    0.15 
 -20   6  -3    1.72    0.14 
  20   6   3    1.40    0.17 
 -20   6  -3    1.59    0.13 
  20   6   3    1.73    0.14 
  20   6   3    1.74    0.12 
 -22  -6  -3    1.32    0.16 
  22  -6   3    1.32    0.13 
 -22  -6  -3    1.07    0.13 
 -22  -6  -3    1.32    0.13 
 -22   6  -3    1.06    0.11 
  22   6   3    0.99    0.11 
  22   6   3    1.12    0.10 
 -22   6  -3    1.02    0.10 
  24  -6   3    1.34    0.12 
 -24  -6  -3    1.25    0.12 
 -24  -6  -3    1.28    0.12 
 -24  -6  -3    1.22    0.14 
 -24   6  -3    1.26    0.10 
 -24   6  -3    1.18    0.11 
  24   6   3    1.24    0.10 
  24   6   3    1.13    0.11 
  26  -6   3    0.87    0.09 
 -26  -6  -3    0.71    0.08 
 -26  -6  -3    0.83    0.09 
  26   6   3    0.69    0.08 
 -26   6  -3    0.69    0.07 
 -26   6  -3    0.73    0.07 
 -29  -7   3    1.12    0.12 
 -29  -7   3    1.25    0.11 
  29  -7  -3    1.07    0.10 
 -29   7   3    1.00    0.09 
 -29   7   3    1.22    0.10 
  29   7  -3    1.05    0.10 
  29   7  -3    1.13    0.11 
 -27  -7   3    0.24    0.05 
  27  -7  -3    0.26    0.07 
 -27  -7   3    0.42    0.07 
 -27  -7   3    0.25    0.06 
 -27   7   3    0.14    0.05 
 -27   7   3    0.14    0.03 
 -27   7   3    0.15    0.05 
  27   7  -3    0.15    0.05 
  27   7  -3    0.17    0.06 
 -25  -7   3    0.43    0.09 
  25  -7  -3    0.50    0.10 
 -25  -7   3    0.49    0.09 
 -25  -7   3    0.66    0.09 
  25   7  -3    0.49    0.08 
 -25   7   3    0.61    0.06 
  25   7  -3    0.64    0.10 
 -25   7   3    0.55    0.07 
 -23  -7   3    1.65    0.17 
 -23  -7   3    1.55    0.15 
  23  -7  -3    1.65    0.17 
 -23  -7   3    1.62    0.16 
 -23   7   3    1.43    0.13 
 -23   7   3    1.52    0.12 
  23   7  -3    1.52    0.16 
 -23   7   3    1.39    0.13 
  23   7  -3    1.44    0.17 
  21  -7  -3    0.31    0.08 
 -21  -7   3    0.38    0.09 
  21  -7  -3    0.54    0.11 
 -21  -7   3    0.31    0.08 
 -21  -7   3    0.39    0.09 
 -21  -7   3    0.40    0.10 
 -21   7   3    0.49    0.08 
 -21   7   3    0.32    0.09 
  21   7  -3    0.38    0.08 
  21   7  -3    0.40    0.05 
 -21   7   3    0.43    0.05 
  21   7  -3    0.39    0.10 
 -19  -7   3    1.85    0.17 
  19  -7  -3    1.83    0.16 
 -19  -7   3    1.70    0.16 
 -19  -7   3    1.73    0.18 
  19  -7  -3    1.49    0.18 
 -19  -7   3    1.65    0.18 
 -19   7   3    1.52    0.12 
 -19   7   3    1.61    0.17 
 -19   7   3    1.55    0.13 
  19   7  -3    1.46    0.17 
  19   7  -3    1.42    0.16 
  19   7  -3    1.55    0.13 
 -17  -7   3    5.98    0.42 
  17  -7  -3    6.27    0.41 
  17  -7  -3    6.08    0.40 
 -17  -7   3    5.75    0.42 
 -17  -7   3    6.06    0.40 
 -17  -7   3    5.75    0.41 
  17  -7  -3    5.99    0.43 
  17   7  -3    5.79    0.41 
 -17   7   3    6.27    0.42 
  17   7  -3    6.08    0.38 
  17   7  -3    5.75    0.42 
  17   7  -3    5.50    0.39 
 -17   7   3    5.82    0.38 
 -15  -7   3    8.15    0.55 
  15  -7  -3    8.96    0.55 
  15  -7  -3    8.08    0.54 
 -15  -7   3    7.19    0.66 
 -15  -7   3    7.96    0.64 
 -15  -7   3    8.42    0.55 
  15  -7  -3    9.23    0.83 
 -15  -7   3    8.15    0.58 
 -15  -7   3    9.27    0.56 
 -15  -7   3    8.03    0.55 
  15   7  -3    7.61    0.54 
  15   7  -3    8.27    0.56 
  15   7  -3    8.32    0.51 
  15   7  -3    8.32    0.53 
 -15   7   3    8.27    0.51 
 -15   7   3    9.05    0.55 
 -13  -7   3    3.88    0.38 
 -13  -7   3    4.16    0.38 
 -13  -7   3    3.71    0.32 
  13  -7  -3    3.51    0.36 
  13   7  -3    4.36    0.35 
 -13   7   3    4.33    0.29 
  13   7  -3    3.95    0.34 
 -13   7   3    3.72    0.30 
  13   7  -3    3.66    0.27 
  13   7  -3    4.33    0.28 
 -11  -7   3    2.47    0.26 
  11  -7  -3    2.78    0.30 
 -11  -7   3    2.87    0.31 
 -11  -7   3    2.88    0.31 
  11   7  -3    3.32    0.28 
 -11   7   3    3.39    0.23 
 -11   7   3    3.06    0.24 
  11   7  -3    3.60    0.23 
  11   7  -3    3.03    0.26 
  -9  -7   3    2.86    0.29 
   9  -7  -3    2.91    0.29 
  -9  -7   3    3.18    0.31 
   9   7  -3    2.53    0.22 
   9   7  -3    2.77    0.25 
   9   7  -3    2.99    0.26 
   9   7  -3    2.94    0.21 
  -7  -7   3    0.79    0.16 
   7  -7  -3    0.69    0.13 
   7   7  -3    0.82    0.12 
   7   7  -3    0.91    0.11 
   7   7  -3    0.67    0.08 
   5  -7  -3    3.51    0.32 
  -5  -7   3    3.60    0.36 
   5   7  -3    3.77    0.26 
   5   7  -3    4.27    0.31 
   5   7  -3    4.04    0.29 
   3  -7  -3   25.42    1.52 
  -3  -7   3   27.65    1.60 
   3   7  -3   23.80    1.48 
   3   7  -3   21.65    1.44 
   3   7  -3   23.47    1.49 
   1  -7  -3   72.72    4.06 
   1  -7  -3   63.97    4.08 
   1  -7  -3   63.70    4.07 
  -1  -7   3   76.64    4.15 
   1   7  -3   66.74    4.03 
   1   7  -3   65.24    3.99 
   1   7  -3   68.58    4.03 
   1  -7   3    3.29    0.33 
  -1  -7  -3    3.21    0.31 
  -1  -7  -3    3.40    0.31 
  -1   7  -3    3.27    0.26 
  -1   7  -3    3.26    0.22 
  -1   7  -3    3.02    0.25 
  -3   7  -3    1.27    0.11 
  -3   7  -3    1.16    0.14 
  -3   7  -3    1.28    0.17 
  -3   7  -3    1.30    0.14 
  -3   7  -3    1.20    0.12 
  -5  -7  -3    2.58    0.29 
  -5  -7  -3    2.87    0.30 
  -5   7  -3    3.06    0.29 
  -5   7  -3    2.79    0.20 
  -5   7  -3    3.01    0.24 
   5   7   3    2.80    0.19 
  -5   7  -3    2.68    0.21 
  -7  -7  -3    2.06    0.25 
  -7  -7  -3    2.00    0.25 
  -7   7  -3    2.03    0.16 
  -7   7  -3    1.94    0.24 
  -7   7  -3    2.23    0.22 
   7   7   3    2.09    0.16 
  -7   7  -3    2.02    0.17 
  -9  -7  -3    1.79    0.25 
  -9  -7  -3    1.81    0.25 
  -9   7  -3    2.09    0.16 
   9   7   3    2.06    0.16 
  -9   7  -3    2.06    0.18 
  -9   7  -3    1.99    0.25 
   9   7   3    2.16    0.17 
 -11  -7  -3    8.91    0.61 
  11  -7   3    9.06    0.60 
 -11  -7  -3    9.31    0.60 
 -11  -7  -3    9.48    0.61 
  11  -7   3   10.08    0.62 
  11   7   3    9.77    0.61 
 -11   7  -3    9.70    0.58 
 -11   7  -3    9.15    0.56 
 -11   7  -3    8.49    0.58 
 -13  -7  -3   14.33    0.86 
  13  -7   3   13.46    0.85 
 -13  -7  -3   15.50    0.90 
 -13  -7  -3   13.68    0.85 
  13  -7   3   14.13    0.86 
 -13  -7  -3   13.64    0.86 
 -13   7  -3   13.15    0.81 
 -13   7  -3   14.09    0.83 
 -13   7  -3   12.48    0.91 
  13   7   3   13.53    0.82 
  13   7   3   13.50    0.86 
 -13   7  -3   11.91    0.83 
  15  -7   3    0.38    0.09 
 -15  -7  -3    0.28    0.11 
 -15  -7  -3    0.31    0.09 
 -15  -7  -3    0.40    0.10 
 -15  -7  -3    0.17    0.08 
  15  -7   3    0.30    0.09 
 -15   7  -3    0.41    0.07 
 -15   7  -3    0.38    0.12 
  15   7   3    0.49    0.10 
  15   7   3    0.44    0.07 
  17  -7   3    3.81    0.30 
 -17  -7  -3    3.48    0.31 
 -17  -7  -3    3.91    0.34 
 -17  -7  -3    3.77    0.32 
  17   7   3    4.43    0.31 
  17   7   3    4.57    0.33 
  17   7   3    4.46    0.29 
 -17   7  -3    4.72    0.29 
 -17   7  -3    4.51    0.28 
 -19  -7  -3    5.90    0.42 
 -19  -7  -3    5.67    0.44 
 -19  -7  -3    6.11    0.41 
  19  -7   3    5.91    0.41 
  19   7   3    6.43    0.39 
 -19   7  -3    6.34    0.39 
 -19   7  -3    6.02    0.38 
  19   7   3    5.74    0.43 
  19   7   3    6.40    0.38 
 -21  -7  -3    1.53    0.14 
 -21  -7  -3    1.41    0.14 
 -21  -7  -3    1.55    0.17 
  21  -7   3    1.34    0.13 
  21   7   3    1.29    0.12 
 -21   7  -3    1.19    0.11 
  21   7   3    1.32    0.11 
 -21   7  -3    1.18    0.11 
 -23  -7  -3    0.50    0.09 
 -23  -7  -3    0.65    0.09 
 -23  -7  -3    0.69    0.09 
  23  -7   3    0.67    0.09 
  23   7   3    0.70    0.07 
 -23   7  -3    0.69    0.07 
 -23   7  -3    0.64    0.07 
  25  -7   3    0.27    0.05 
 -25  -7  -3    0.27    0.05 
 -25  -7  -3    0.32    0.05 
  25   7   3    0.19    0.03 
 -25   7  -3    0.22    0.04 
 -25   7  -3    0.25    0.06 
 -26  -8   3    0.05    0.04 
 -26  -8   3    0.06    0.05 
  26   8  -3    0.09    0.05 
 -26   8   3    0.14    0.04 
  26   8  -3    0.07    0.05 
 -24  -8   3    0.50    0.09 
 -24  -8   3    0.40    0.07 
 -24   8   3    0.54    0.06 
 -24   8   3    0.43    0.07 
  24   8  -3    0.55    0.09 
  24   8  -3    0.50    0.08 
 -24   8   3    0.60    0.08 
 -22  -8   3    1.07    0.14 
 -22  -8   3    1.15    0.13 
 -22  -8   3    1.20    0.12 
 -22   8   3    0.82    0.14 
 -22   8   3    1.04    0.10 
  22   8  -3    1.13    0.14 
 -22   8   3    1.21    0.09 
  22   8  -3    1.06    0.13 
 -20  -8   3    0.09    0.06 
 -20  -8   3    0.12    0.06 
 -20  -8   3    0.03    0.06 
 -20  -8   3    0.06    0.07 
  20  -8  -3    0.15    0.06 
  20   8  -3    0.08    0.04 
  20   8  -3    0.10    0.06 
 -20   8   3    0.08    0.04 
 -20   8   3    0.06    0.04 
  20   8  -3    0.08    0.07 
 -20   8   3    0.06    0.06 
 -18  -8   3    0.42    0.10 
 -18  -8   3    0.30    0.08 
  18  -8  -3    0.30    0.07 
 -18  -8   3    0.29    0.08 
 -18  -8   3    0.38    0.09 
  18  -8  -3    0.34    0.08 
  18   8  -3    0.42    0.06 
  18   8  -3    0.30    0.07 
  18   8  -3    0.44    0.10 
 -18   8   3    0.33    0.08 
 -18   8   3    0.48    0.07 
  18   8  -3    0.32    0.08 
  16  -8  -3    1.30    0.14 
 -16  -8   3    1.26    0.15 
  16  -8  -3    1.27    0.14 
 -16  -8   3    1.15    0.13 
 -16  -8   3    1.19    0.14 
 -16  -8   3    1.26    0.15 
 -16   8   3    1.20    0.11 
 -16   8   3    1.21    0.14 
  16   8  -3    1.13    0.11 
  16   8  -3    1.09    0.15 
  16   8  -3    1.19    0.15 
  16   8  -3    1.23    0.13 
  14  -8  -3    2.78    0.23 
 -14  -8   3    2.54    0.22 
  14  -8  -3    2.87    0.23 
 -14  -8   3    2.82    0.23 
 -14  -8   3    2.49    0.22 
 -14  -8   3    2.40    0.21 
  14   8  -3    2.67    0.23 
  14   8  -3    2.30    0.26 
  14   8  -3    2.79    0.21 
  14   8  -3    2.70    0.22 
 -14   8   3    2.62    0.18 
  14   8  -3    2.63    0.19 
 -14   8   3    2.74    0.22 
  12  -8  -3    0.61    0.11 
 -12  -8   3    0.56    0.10 
  12  -8  -3    0.57    0.10 
 -12  -8   3    0.50    0.10 
 -12  -8   3    0.61    0.10 
 -12  -8   3    0.51    0.09 
 -12  -8   3    0.49    0.09 
  12   8  -3    0.60    0.13 
  12   8  -3    0.64    0.08 
  12   8  -3    0.49    0.09 
  12   8  -3    0.75    0.10 
  12   8  -3    0.79    0.12 
 -12   8   3    0.68    0.09 
 -10  -8   3    2.73    0.25 
 -10  -8   3    2.56    0.29 
  10  -8  -3    2.23    0.22 
  10  -8  -3    2.35    0.27 
  10   8  -3    1.90    0.20 
  10   8  -3    2.05    0.22 
  10   8  -3    2.42    0.24 
  10   8  -3    2.33    0.18 
 -10   8   3    2.34    0.18 
   8  -8  -3    0.60    0.16 
  -8  -8   3    0.62    0.18 
   8   8  -3    0.58    0.08 
   8   8  -3    0.58    0.11 
   8   8  -3    0.58    0.09 
  -8   8   3    0.58    0.07 
   6  -8  -3    0.03    0.08 
  -6  -8   3    0.01    0.09 
   6   8  -3    0.04    0.03 
   6   8  -3    0.03    0.04 
   6   8  -3    0.05    0.06 
  -4  -8   3    0.20    0.14 
   4  -8  -3    0.09    0.09 
   4   8  -3    0.10    0.05 
   4   8  -3    0.14    0.05 
   4   8  -3    0.24    0.08 
   2  -8  -3   15.71    1.08 
  -2  -8   3   17.54    1.17 
   2   8  -3   16.15    1.05 
   2   8  -3   16.53    1.01 
   2   8  -3   17.79    1.07 
   0  -8   3   11.43    0.86 
   0   8  -3   11.98    0.72 
   0   8  -3   12.40    0.77 
   0   8  -3   10.90    0.76 
  -2  -8  -3    1.03    0.19 
  -2  -8  -3    1.16    0.19 
  -2   8  -3    1.43    0.15 
  -2   8  -3    1.45    0.12 
  -2   8  -3    1.13    0.14 
  -4  -8  -3    0.17    0.11 
  -4  -8  -3    0.15    0.12 
  -4   8  -3    0.31    0.06 
  -4   8  -3    0.22    0.11 
  -4   8  -3    0.31    0.09 
  -6  -8  -3    0.16    0.12 
   6  -8   3    0.15    0.07 
   6  -8   3    0.12    0.07 
  -6  -8  -3    0.11    0.10 
  -6   8  -3    0.12    0.06 
  -6   8  -3    0.18    0.05 
  -6   8  -3    0.23    0.08 
  -6   8  -3    0.26    0.05 
  -8  -8  -3    1.80    0.19 
   8  -8   3    1.91    0.17 
   8  -8   3    1.87    0.19 
   8  -8   3    2.00    0.19 
  -8  -8  -3    1.96    0.19 
  -8   8  -3    1.88    0.15 
   8   8   3    1.76    0.17 
  -8   8  -3    1.91    0.16 
  -8   8  -3    1.85    0.14 
  10  -8   3    3.92    0.31 
  10  -8   3    3.84    0.31 
 -10  -8  -3    3.59    0.34 
 -10  -8  -3    4.33    0.32 
 -10  -8  -3    3.66    0.30 
 -10  -8  -3    3.89    0.31 
  10  -8   3    4.08    0.30 
 -10   8  -3    4.50    0.27 
  10   8   3    4.45    0.30 
 -10   8  -3    4.27    0.28 
 -10   8  -3    4.18    0.29 
 -12  -8  -3    4.47    0.39 
  12  -8   3    4.49    0.36 
 -12  -8  -3    4.66    0.37 
 -12  -8  -3    4.61    0.35 
  12  -8   3    4.84    0.36 
  12  -8   3    5.04    0.35 
 -12   8  -3    5.42    0.33 
  12   8   3    5.17    0.36 
 -12   8  -3    5.44    0.31 
 -12   8  -3    5.14    0.34 
  14  -8   3    1.86    0.19 
 -14  -8  -3    1.73    0.19 
  14  -8   3    1.81    0.18 
 -14  -8  -3    1.89    0.20 
 -14  -8  -3    2.28    0.23 
 -14   8  -3    2.21    0.16 
  14   8   3    1.99    0.19 
  14   8   3    2.23    0.16 
 -14   8  -3    2.00    0.14 
 -16  -8  -3    1.17    0.14 
  16  -8   3    0.98    0.13 
 -16  -8  -3    1.18    0.18 
 -16  -8  -3    0.93    0.14 
  16  -8   3    1.07    0.14 
 -16   8  -3    1.29    0.11 
 -16   8  -3    1.40    0.12 
  16   8   3    1.39    0.12 
  16   8   3    1.23    0.15 
 -18  -8  -3    0.08    0.07 
 -18  -8  -3    0.01    0.06 
  18  -8   3    0.10    0.05 
 -18  -8  -3    0.04    0.08 
  18   8   3    0.23    0.04 
  18   8   3    0.22    0.08 
 -18   8  -3    0.21    0.05 
 -18   8  -3    0.21    0.05 
 -20  -8  -3    1.68    0.17 
  20  -8   3    1.74    0.14 
 -20  -8  -3    1.80    0.16 
 -20  -8  -3    1.75    0.16 
  20   8   3    1.64    0.13 
  20   8   3    1.67    0.12 
 -20   8  -3    1.58    0.13 
 -20   8  -3    1.53    0.12 
 -22  -8  -3    1.08    0.11 
 -22  -8  -3    1.18    0.11 
 -22  -8  -3    0.85    0.12 
  22  -8   3    1.04    0.10 
 -22   8  -3    0.97    0.09 
 -22   8  -3    1.14    0.09 
  22   8   3    1.10    0.08 
 -25  -9   3    0.15    0.05 
 -25  -9   3    0.13    0.04 
  25   9  -3    0.20    0.05 
  25   9  -3    0.15    0.05 
 -25   9   3    0.21    0.04 
 -25   9   3    0.20    0.03 
 -23  -9   3    0.03    0.04 
 -23  -9   3    0.08    0.05 
 -23   9   3    0.03    0.04 
  23   9  -3    0.04    0.05 
  23   9  -3    0.04    0.05 
  23   9  -3    0.00    0.03 
 -23   9   3    0.01    0.03 
 -23   9   3   -0.01    0.03 
 -21  -9   3    0.59    0.10 
 -21  -9   3    0.63    0.09 
 -21   9   3    0.73    0.07 
 -21   9   3    0.59    0.08 
  21   9  -3    0.64    0.10 
  21   9  -3    0.74    0.11 
 -19  -9   3    4.73    0.35 
 -19  -9   3    4.80    0.34 
  19  -9  -3    4.95    0.34 
  19  -9  -3    5.04    0.34 
 -19  -9   3    4.50    0.34 
 -19   9   3    4.82    0.32 
 -19   9   3    5.10    0.31 
  19   9  -3    4.92    0.35 
  19   9  -3    5.26    0.31 
  19   9  -3    5.20    0.35 
 -17  -9   3    5.28    0.39 
 -17  -9   3    5.66    0.38 
  17  -9  -3    5.67    0.39 
  17  -9  -3    5.80    0.39 
 -17  -9   3    5.61    0.40 
  17   9  -3    5.63    0.40 
 -17   9   3    5.74    0.36 
  17   9  -3    5.85    0.36 
  17   9  -3    5.85    0.39 
 -15  -9   3    3.77    0.31 
  15  -9  -3    4.31    0.31 
  15  -9  -3    3.84    0.31 
 -15  -9   3    3.93    0.30 
 -15  -9   3    4.08    0.31 
 -15   9   3    4.34    0.32 
  15   9  -3    4.45    0.30 
 -15   9   3    4.41    0.28 
  15   9  -3    4.17    0.31 
  15   9  -3    4.45    0.28 
  15   9  -3    4.25    0.31 
 -13  -9   3    5.75    0.37 
 -13  -9   3    5.71    0.39 
  13  -9  -3    6.05    0.39 
 -13  -9   3    5.59    0.39 
  13  -9  -3    5.88    0.39 
  13   9  -3    5.57    0.37 
 -13   9   3    5.41    0.38 
 -13   9   3    5.24    0.38 
  13   9  -3    4.56    0.42 
  13   9  -3    5.23    0.38 
  13   9  -3    5.25    0.38 
  13   9  -3    5.36    0.35 
 -11  -9   3    5.16    0.35 
  11  -9  -3    5.18    0.37 
 -11  -9   3    5.57    0.37 
 -11  -9   3    5.57    0.36 
  11  -9  -3    5.11    0.36 
 -11   9   3    4.98    0.35 
  11   9  -3    4.79    0.36 
  11   9  -3    5.23    0.35 
  11   9  -3    4.99    0.33 
  11   9  -3    4.50    0.40 
   9  -9  -3    4.53    0.36 
  -9  -9   3    5.05    0.36 
  -9  -9   3    5.03    0.36 
   9  -9  -3    4.84    0.36 
  -9  -9   3    4.92    0.34 
   9   9  -3    5.14    0.41 
  -9   9   3    5.29    0.34 
   9   9  -3    5.22    0.33 
   9   9  -3    5.89    0.35 
  -7  -9   3    1.10    0.12 
   7  -9  -3    1.13    0.14 
  -7  -9   3    0.87    0.11 
   7  -9  -3    0.79    0.12 
  -7  -9   3    1.01    0.12 
   7   9  -3    0.93    0.11 
   7   9  -3    0.88    0.14 
  -5  -9   3    1.07    0.12 
  -5  -9   3    1.11    0.13 
  -5  -9   3    1.55    0.19 
   5  -9  -3    1.12    0.15 
  -5  -9   3    1.02    0.13 
   5   9  -3    1.61    0.18 
   5   9  -3    1.53    0.13 
   3  -9  -3    0.64    0.10 
  -3  -9   3    0.70    0.10 
  -3  -9   3    0.62    0.10 
  -3  -9   3    0.79    0.13 
   3   9  -3    0.66    0.07 
   3   9  -3    0.73    0.13 
   3   9  -3    0.60    0.08 
  -1  -9   3   11.27    0.77 
  -1  -9   3   11.49    0.74 
  -1  -9   3   11.84    0.74 
  -1  -9   3   12.32    0.78 
   1   9  -3   12.71    0.79 
   1   9  -3   11.59    0.72 
   1   9  -3   12.34    0.74 
   1  -9   3   12.71    0.82 
   1  -9   3   13.51    0.86 
   1  -9   3   12.82    0.83 
   1  -9   3   13.57    0.86 
  -1   9  -3   14.67    0.82 
  -1   9  -3   13.83    0.87 
  -1   9  -3   12.96    0.80 
   3  -9   3    4.51    0.33 
   3  -9   3    4.49    0.35 
   3  -9   3    4.22    0.33 
   3  -9   3    4.53    0.36 
   3  -9   3    4.71    0.37 
  -3   9  -3    5.62    0.33 
  -3   9  -3    5.51    0.38 
  -3   9  -3    5.11    0.36 
  -3   9  -3    5.30    0.31 
   5  -9   3    7.12    0.49 
   5  -9   3    7.81    0.53 
   5  -9   3    7.76    0.53 
   5  -9   3    7.47    0.49 
  -5   9  -3    7.65    0.49 
  -5   9  -3    7.97    0.54 
  -5   9  -3    7.80    0.47 
  -5   9  -3    7.96    0.49 
   7  -9   3    3.09    0.23 
  -7  -9  -3    2.83    0.25 
   7  -9   3    3.00    0.23 
   7  -9   3    3.26    0.26 
   7  -9   3    3.29    0.26 
  -7  -9  -3    3.03    0.28 
  -7   9  -3    3.09    0.32 
  -7   9  -3    3.21    0.22 
  -7   9  -3    3.18    0.21 
  -7   9  -3    3.00    0.23 
  -9  -9  -3    0.14    0.10 
   9  -9   3    0.17    0.06 
  -9  -9  -3    0.09    0.08 
   9  -9   3    0.10    0.07 
   9  -9   3    0.13    0.07 
  -9  -9  -3    0.10    0.06 
  -9   9  -3    0.17    0.04 
  -9   9  -3    0.15    0.05 
   9   9   3    0.16    0.06 
  -9   9  -3    0.13    0.05 
  11  -9   3    0.50    0.10 
  11  -9   3    0.50    0.09 
 -11  -9  -3    0.44    0.09 
 -11  -9  -3    0.42    0.10 
  11  -9   3    0.43    0.09 
 -11   9  -3    0.64    0.09 
 -11   9  -3    0.76    0.09 
 -11   9  -3    0.72    0.07 
  11   9   3    0.74    0.11 
 -13  -9  -3    1.77    0.21 
 -13  -9  -3    1.47    0.16 
  13  -9   3    1.52    0.14 
  13  -9   3    1.69    0.16 
  13  -9   3    1.45    0.15 
 -13  -9  -3    1.50    0.17 
  13   9   3    1.43    0.15 
  13   9   3    1.31    0.12 
 -13   9  -3    1.43    0.13 
 -13   9  -3    1.41    0.11 
  15  -9   3    3.50    0.26 
 -15  -9  -3    3.49    0.26 
 -15  -9  -3    3.57    0.29 
 -15  -9  -3    3.98    0.28 
  15  -9   3    3.45    0.24 
 -15   9  -3    3.23    0.23 
  15   9   3    3.19    0.27 
  15   9   3    3.07    0.23 
 -15   9  -3    3.30    0.23 
  17  -9   3    3.63    0.27 
 -17  -9  -3    4.21    0.29 
  17  -9   3    3.92    0.26 
 -17  -9  -3    4.13    0.28 
 -17  -9  -3    3.98    0.31 
  17   9   3    3.56    0.25 
 -17   9  -3    3.78    0.25 
  17   9   3    3.73    0.24 
 -17   9  -3    3.77    0.25 
  19  -9   3    1.20    0.10 
 -19   9  -3    0.94    0.09 
  19   9   3    0.96    0.08 
 -19   9  -3    1.00    0.09 
  19   9   3    0.98    0.09 
 -21  -9  -3    0.27    0.05 
  21   9   3    0.16    0.03 
 -21   9  -3    0.15    0.03 
 -21   9  -3    0.13    0.03 
 -22 -10   3    0.03    0.03 
 -22 -10   3    0.03    0.04 
  22  10  -3    0.06    0.04 
 -22  10   3    0.06    0.03 
  22  10  -3    0.04    0.03 
 -22  10   3    0.06    0.02 
 -20 -10   3    0.11    0.05 
 -20 -10   3    0.13    0.05 
  20 -10  -3    0.09    0.04 
 -20  10   3    0.20    0.03 
  20  10  -3    0.20    0.06 
  20  10  -3    0.09    0.04 
 -20  10   3    0.12    0.04 
  20  10  -3    0.09    0.02 
 -18 -10   3    0.21    0.06 
 -18 -10   3    0.17    0.06 
  18 -10  -3    0.19    0.06 
 -18 -10   3    0.16    0.06 
  18  10  -3    0.15    0.03 
 -18  10   3    0.16    0.04 
  18  10  -3    0.18    0.06 
 -18  10   3    0.17    0.04 
  16 -10  -3    0.49    0.08 
 -16 -10   3    0.38    0.08 
 -16 -10   3    0.37    0.08 
 -16 -10   3    0.52    0.08 
  16 -10  -3    0.51    0.09 
 -16  10   3    0.53    0.09 
  16  10  -3    0.33    0.06 
 -16  10   3    0.48    0.07 
  16  10  -3    0.56    0.09 
 -14 -10   3    0.45    0.08 
 -14 -10   3    0.47    0.09 
 -14 -10   3    0.37    0.08 
  14 -10  -3    0.56    0.09 
  14 -10  -3    0.53    0.10 
  14  10  -3    0.35    0.07 
 -14  10   3    0.52    0.07 
  14  10  -3    0.41    0.11 
 -14  10   3    0.54    0.09 
 -12 -10   3    0.51    0.09 
  12 -10  -3    0.60    0.10 
  12 -10  -3    0.61    0.10 
 -12 -10   3    0.59    0.08 
 -12 -10   3    0.64    0.10 
  12  10  -3    0.34    0.07 
 -12  10   3    0.36    0.08 
  12  10  -3    0.24    0.09 
 -10 -10   3    0.99    0.12 
 -10 -10   3    1.07    0.12 
  10 -10  -3    0.87    0.12 
  10 -10  -3    0.83    0.13 
 -10 -10   3    0.96    0.11 
  10  10  -3    0.69    0.10 
 -10  10   3    0.60    0.09 
  10  10  -3    0.56    0.12 
   8 -10  -3    1.92    0.19 
  -8 -10   3    2.21    0.19 
  -8 -10   3    2.12    0.18 
  -8 -10   3    2.10    0.17 
   8 -10  -3    1.97    0.20 
  -8  10   3    2.15    0.21 
   8  10  -3    2.15    0.16 
   8  10  -3    2.07    0.22 
   8  10  -3    2.49    0.18 
  -6 -10   3    3.97    0.28 
  -6 -10   3    3.88    0.28 
  -6 -10   3    3.85    0.27 
   6 -10  -3    3.82    0.29 
   6  10  -3    3.94    0.27 
   6  10  -3    3.52    0.27 
   6  10  -3    3.73    0.25 
   6  10  -3    3.63    0.32 
   4 -10  -3    0.69    0.10 
  -4 -10   3    0.86    0.13 
  -4 -10   3    0.90    0.11 
  -4 -10   3    0.78    0.10 
   4  10  -3    0.52    0.07 
   4  10  -3    0.46    0.11 
   4  10  -3    0.46    0.08 
  -2 -10   3    4.57    0.31 
  -2 -10   3    4.52    0.35 
  -2 -10   3    4.54    0.31 
   2  10  -3    4.26    0.35 
   2  10  -3    4.47    0.30 
   2  10  -3    4.27    0.28 
   0 -10   3    0.89    0.11 
   0 -10   3    0.88    0.14 
   0 -10   3    0.75    0.12 
   0 -10   3    0.82    0.10 
   0  10  -3    0.73    0.08 
   0  10  -3    0.73    0.12 
   0  10  -3    0.75    0.09 
   0  10  -3    0.65    0.12 
   2 -10   3    3.62    0.29 
   2 -10   3    3.81    0.25 
   2 -10   3    3.66    0.25 
   2 -10   3    3.37    0.28 
  -2  10  -3    3.22    0.28 
  -2  10  -3    3.13    0.26 
  -2  10  -3    3.25    0.24 
  -2  10  -3    3.26    0.22 
   4 -10   3    4.87    0.32 
   4 -10   3    4.88    0.35 
   4 -10   3    4.91    0.36 
  -4  10  -3    4.54    0.29 
  -4  10  -3    4.95    0.31 
  -4  10  -3    4.36    0.31 
  -4  10  -3    4.24    0.35 
   6 -10   3    3.04    0.27 
   6 -10   3    3.51    0.28 
   6 -10   3    2.99    0.24 
  -6  10  -3    3.31    0.30 
  -6  10  -3    3.31    0.24 
  -6  10  -3    3.55    0.23 
  -6  10  -3    3.58    0.22 
   8 -10   3    1.13    0.14 
   8 -10   3    0.97    0.11 
   8 -10   3    1.06    0.14 
  -8  10  -3    1.27    0.10 
   8  10   3    1.05    0.14 
  -8  10  -3    1.20    0.11 
  -8  10  -3    1.22    0.12 
 -10 -10  -3    0.45    0.11 
  10 -10   3    0.42    0.09 
  10 -10   3    0.32    0.08 
 -10 -10  -3    0.30    0.07 
 -10  10  -3    0.13    0.05 
 -10  10  -3    0.19    0.05 
 -10  10  -3    0.19    0.04 
  10  10   3    0.14    0.07 
 -10  10  -3    0.16    0.05 
 -12 -10  -3    1.12    0.13 
 -12 -10  -3    1.28    0.18 
  12 -10   3    1.21    0.13 
  12 -10   3    1.30    0.13 
 -12  10  -3    1.04    0.10 
  12  10   3    1.03    0.13 
 -12  10  -3    0.92    0.09 
 -14 -10  -3    0.55    0.09 
  14 -10   3    0.43    0.09 
  14 -10   3    0.66    0.09 
 -14  10  -3    0.43    0.06 
  14  10   3    0.42    0.07 
 -14  10  -3    0.46    0.06 
 -14  10  -3    0.44    0.06 
 -16 -10  -3    0.97    0.11 
  16 -10   3    0.83    0.09 
  16  10   3    0.60    0.08 
 -16  10  -3    0.64    0.08 
 -16  10  -3    0.62    0.07 
  18 -10   3    2.18    0.17 
 -18 -10  -3    2.62    0.18 
  18  10   3    2.36    0.15 
 -18  10  -3    2.40    0.16 
 -18  10  -3    2.37    0.16 
  19 -11  -3    0.29    0.05 
 -19 -11   3    0.34    0.06 
 -19 -11   3    0.35    0.05 
 -19  11   3    0.42    0.05 
  19  11  -3    0.28    0.05 
  19  11  -3    0.35    0.06 
  19  11  -3    0.39    0.04 
 -17 -11   3    1.47    0.13 
 -17 -11   3    1.43    0.12 
 -17 -11   3    1.29    0.12 
  17 -11  -3    1.48    0.13 
 -17  11   3    1.18    0.11 
 -17  11   3    1.25    0.10 
  17  11  -3    1.37    0.12 
  17  11  -3    1.31    0.10 
  15 -11  -3    0.63    0.09 
 -15 -11   3    0.49    0.08 
 -15 -11   3    0.59    0.09 
 -15 -11   3    0.55    0.08 
 -15  11   3    0.70    0.07 
  15  11  -3    0.73    0.09 
  15  11  -3    0.73    0.07 
 -13 -11   3    0.21    0.07 
 -13 -11   3    0.14    0.06 
 -13 -11   3    0.22    0.06 
  13 -11  -3    0.25    0.07 
  13  11  -3    0.24    0.05 
 -13  11   3    0.34    0.05 
  13  11  -3    0.25    0.04 
  13  11  -3    0.27    0.06 
 -11 -11   3    1.37    0.12 
  11 -11  -3    1.29    0.14 
 -11 -11   3    1.46    0.14 
 -11 -11   3    1.24    0.13 
  11 -11  -3    1.29    0.14 
  11  11  -3    1.07    0.13 
  11  11  -3    1.04    0.11 
  11  11  -3    1.00    0.10 
  -9 -11   3    0.70    0.10 
  -9 -11   3    0.74    0.10 
   9 -11  -3    0.58    0.09 
   9 -11  -3    0.91    0.13 
   9  11  -3    0.51    0.11 
   9  11  -3    0.71    0.07 
   9  11  -3    0.64    0.09 
  -9  11   3    0.59    0.08 
   9  11  -3    0.53    0.08 
  -7 -11   3    1.95    0.16 
   7 -11  -3    1.73    0.17 
  -7 -11   3    1.87    0.16 
   7  11  -3    1.80    0.16 
   7  11  -3    1.88    0.13 
   7  11  -3    1.78    0.15 
   7  11  -3    1.45    0.18 
  -5 -11   3    2.49    0.19 
  -5 -11   3    2.62    0.20 
   5 -11  -3    2.53    0.21 
   5  11  -3    2.09    0.22 
   5  11  -3    2.36    0.18 
   5  11  -3    2.49    0.17 
  -3 -11   3    2.18    0.18 
  -3 -11   3    2.07    0.21 
  -3 -11   3    2.10    0.17 
   3 -11  -3    1.76    0.21 
   3  11  -3    2.37    0.17 
   3  11  -3    1.97    0.20 
   3  11  -3    2.36    0.16 
  -1 -11   3    2.91    0.22 
  -1 -11   3    3.03    0.26 
  -1 -11   3    2.92    0.22 
   1  11  -3    3.02    0.21 
   1  11  -3    2.76    0.25 
   1  11  -3    3.08    0.24 
   1  11  -3    3.23    0.20 
   1 -11   3    2.90    0.25 
   1 -11   3    3.58    0.27 
   1 -11   3    3.21    0.23 
  -1  11  -3    2.99    0.21 
  -1  11  -3    3.05    0.20 
  -1  11  -3    2.90    0.24 
  -1  11  -3    2.54    0.24 
   3 -11   3    0.98    0.14 
   3 -11   3    0.90    0.13 
   3 -11   3    0.91    0.10 
  -3  11  -3    0.69    0.08 
  -3  11  -3    0.64    0.09 
  -3  11  -3    0.55    0.11 
  -3  11  -3    0.64    0.07 
   5 -11   3    0.34    0.06 
   5 -11   3    0.31    0.08 
   5 -11   3    0.24    0.07 
  -5  11  -3    0.19    0.04 
  -5  11  -3    0.16    0.05 
  -5  11  -3    0.16    0.05 
   7 -11   3    1.32    0.15 
   7 -11   3    1.14    0.11 
   7 -11   3    1.31    0.15 
  -7  11  -3    1.39    0.10 
  -7  11  -3    1.11    0.11 
  -7  11  -3    1.31    0.12 
   9 -11   3    2.25    0.19 
   9 -11   3    2.16    0.19 
  -9  11  -3    2.18    0.15 
  -9  11  -3    2.00    0.17 
  -9  11  -3    2.34    0.16 
  11 -11   3    1.72    0.15 
  11 -11   3    1.54    0.15 
 -11  11  -3    1.80    0.13 
 -11  11  -3    1.74    0.12 
  13 -11   3    1.67    0.14 
  13 -11   3    1.57    0.14 
 -13  11  -3    1.71    0.12 
 -13  11  -3    1.86    0.13 
  15 -11   3    0.64    0.07 
 -15  11  -3    0.46    0.06 
 -15  11  -3    0.62    0.06 
 -16 -12   3    0.04    0.03 
  16 -12  -3    0.00    0.03 
  16  12  -3    0.01    0.03 
  16  12  -3    0.03    0.02 
 -14 -12   3    0.22    0.05 
 -14 -12   3    0.22    0.05 
  14 -12  -3    0.29    0.05 
  14  12  -3    0.34    0.04 
  14  12  -3    0.23    0.05 
  12 -12  -3    1.91    0.15 
 -12 -12   3    1.69    0.14 
 -12 -12   3    1.85    0.15 
  12  12  -3    1.59    0.14 
  12  12  -3    1.76    0.13 
 -10 -12   3    3.83    0.25 
  10 -12  -3    4.13    0.26 
 -10 -12   3    3.85    0.25 
  10  12  -3    3.53    0.23 
  10  12  -3    3.38    0.25 
  10  12  -3    2.97    0.24 
  -8 -12   3    3.42    0.23 
   8 -12  -3    3.32    0.24 
  -8 -12   3    3.41    0.23 
   8  12  -3    2.76    0.23 
   8  12  -3    2.76    0.22 
   8  12  -3    3.26    0.21 
   6 -12  -3    4.23    0.32 
  -6 -12   3    4.38    0.31 
  -6 -12   3    4.50    0.32 
   6  12  -3    5.19    0.34 
   6  12  -3    4.74    0.31 
   6  12  -3    5.32    0.30 
   4 -12  -3    4.75    0.36 
  -4 -12   3    5.44    0.35 
  -4 -12   3    5.46    0.34 
   4  12  -3    5.44    0.33 
   4  12  -3    5.42    0.36 
   4  12  -3    4.78    0.33 
  -2 -12   3    5.44    0.38 
  -2 -12   3    5.79    0.36 
   2  12  -3    5.42    0.37 
   2  12  -3    5.64    0.34 
   2  12  -3    5.00    0.35 
   0 -12   3    1.61    0.14 
   0 -12   3    1.61    0.16 
   0  12  -3    1.42    0.12 
   0  12  -3    1.74    0.14 
   0  12  -3    1.62    0.15 
   0  12  -3    1.67    0.12 
   2 -12   3    0.05    0.06 
   2 -12   3    0.09    0.04 
  -2  12  -3    0.08    0.04 
  -2  12  -3    0.10    0.04 
  -2  12  -3    0.09    0.03 
   4 -12   3    0.22    0.07 
   4 -12   3    0.22    0.05 
   4 -12   3    0.25    0.07 
  -4  12  -3    0.32    0.04 
  -4  12  -3    0.33    0.05 
  -4  12  -3    0.28    0.05 
   6 -12   3    1.33    0.14 
   6 -12   3    1.29    0.11 
   6 -12   3    1.48    0.14 
  -6  12  -3    1.53    0.12 
  -6  12  -3    1.45    0.10 
  -6  12  -3    1.41    0.11 
   8 -12   3    6.06    0.39 
   8 -12   3    6.08    0.39 
  -8  12  -3    6.00    0.37 
  -8  12  -3    5.98    0.36 
  10 -12   3    4.73    0.30 
  10 -12   3    4.59    0.30 
 -10  12  -3    4.36    0.28 
 -10  12  -3    4.71    0.29 
   9 -13  -3    0.16    0.05 
  -9 -13   3    0.17    0.04 
   9  13  -3    0.17    0.03 
  -7 -13   3    0.43    0.06 
   7 -13  -3    0.34    0.06 
   7  13  -3    0.49    0.08 
   7  13  -3    0.46    0.05 
  -5 -13   3    0.37    0.06 
   5  13  -3    0.35    0.04 
   5  13  -3    0.37    0.06 
  -3 -13   3    0.48    0.07 
   3  13  -3    0.48    0.05 
   3  13  -3    0.47    0.06 
   3  13  -3    0.36    0.06 
  -1 -13   3    0.17    0.04 
  -1 -13   3    0.09    0.05 
   1  13  -3    0.11    0.06 
   1  13  -3    0.14    0.03 
   1  13  -3    0.14    0.04 
   1 -13   3    0.04    0.04 
   1 -13   3    0.08    0.03 
  -1  13  -3    0.06    0.03 
  -1  13  -3    0.06    0.02 
   3 -13   3    0.21    0.05 
  -3  13  -3    0.29    0.04 
  -3  13  -3    0.23    0.05 
  -3  13  -3    0.31    0.04 
 -34   0   4    0.02    0.03 
 -32   0   4    0.00    0.05 
 -32   0   4    0.01    0.04 
  32   0  -4    0.02    0.05 
 -30   0   4    0.13    0.05 
 -30   0   4    0.16    0.05 
  30   0  -4    0.08    0.06 
  28   0  -4    0.52    0.10 
 -28   0   4    0.52    0.08 
 -28   0   4    0.41    0.08 
 -26   0   4   -0.02    0.06 
  26   0  -4    0.09    0.07 
 -26   0   4    0.07    0.06 
 -26   0   4    0.06    0.06 
 -24   0   4    1.58    0.18 
 -24   0   4    1.29    0.15 
  24   0  -4    1.22    0.17 
 -24   0   4    1.31    0.14 
  22   0  -4    2.98    0.26 
 -22   0   4    2.91    0.21 
 -22   0   4    2.41    0.30 
  20   0  -4    9.70    0.69 
 -20   0   4   11.43    0.71 
 -20   0   4   10.01    0.65 
  18   0  -4    5.23    0.38 
 -18   0   4    4.98    0.37 
 -18   0   4    4.97    0.43 
 -18   0   4    5.11    0.34 
 -18   0   4    5.49    0.40 
 -16   0   4   34.10    2.07 
 -16   0   4   33.62    2.13 
 -16   0   4   35.12    2.04 
 -16   0   4   33.74    2.08 
  16   0  -4   35.96    2.08 
  14   0  -4   13.89    0.85 
 -14   0   4   13.54    0.82 
 -14   0   4   13.07    0.89 
 -14   0   4   13.24    0.84 
  12   0  -4    0.06    0.05 
 -12   0   4    0.14    0.04 
 -12   0   4    0.05    0.05 
 -12   0   4    0.14    0.06 
 -10   0   4    0.42    0.07 
 -10   0   4    0.51    0.09 
 -10   0   4    0.37    0.06 
  10   0  -4    0.40    0.07 
 -10   0   4    0.42    0.05 
  -8   0   4   45.25    2.75 
  -8   0   4   45.17    2.77 
  -8   0   4   46.23    2.80 
   8   0  -4   48.59    2.78 
  -8   0   4   49.36    2.77 
  -6   0   4   92.39    5.43 
  -6   0   4   86.91    5.41 
  -6   0   4   94.27    5.46 
  -6   0   4   99.30    5.44 
   6   0  -4   91.27    5.44 
  -4   0   4   79.41    4.41 
  -4   0   4   77.14    4.44 
   4   0  -4   72.49    4.41 
  -4   0   4   68.82    4.39 
  -4   0   4   78.51    4.41 
  -2   0   4    8.47    0.53 
  -2   0   4    9.09    0.54 
  -2   0   4    7.66    0.51 
  -2   0   4    8.85    0.57 
   2   0  -4    7.99    0.52 
   0   0   4   22.67    1.32 
   0   0   4   23.85    1.33 
   0   0   4   19.53    1.29 
   0   0   4   21.91    1.35 
  -2   0  -4    5.44    0.38 
   2   0   4    5.09    0.38 
   2   0   4    5.45    0.36 
   2   0   4    4.90    0.33 
   2   0   4    5.38    0.35 
   4   0   4   27.76    1.66 
   4   0   4   26.98    1.62 
  -4   0  -4   27.27    1.64 
   4   0   4   26.25    1.59 
   4   0   4   26.44    1.61 
   6   0   4    2.38    0.20 
   6   0   4    2.45    0.18 
   6   0   4    2.43    0.20 
   6   0   4    2.39    0.23 
  -6   0  -4    2.18    0.28 
   8   0   4    1.09    0.16 
   8   0   4    0.97    0.12 
   8   0   4    1.21    0.13 
   8   0   4    1.18    0.11 
   8   0   4    1.05    0.12 
  10   0   4   11.65    0.83 
  10   0   4   13.21    0.73 
  10   0   4   10.47    0.75 
  12   0   4    5.35    0.34 
  12   0   4    4.64    0.44 
  14   0   4    5.25    0.46 
  14   0   4    6.37    0.39 
  14   0   4    5.78    0.57 
  14   0   4    5.26    0.50 
  16   0   4    2.42    0.28 
  16   0   4    2.73    0.21 
  16   0   4    2.80    0.27 
  16   0   4    2.67    0.32 
 -18   0  -4    5.45    0.35 
  18   0   4    5.11    0.37 
 -18   0  -4    5.65    0.37 
 -18   0  -4    4.68    0.38 
  18   0   4    5.87    0.37 
 -20   0  -4   -0.05    0.04 
  20   0   4    0.03    0.05 
  20   0   4    0.02    0.07 
  20   0   4   -0.01    0.05 
 -20   0  -4   -0.03    0.05 
  22   0   4    3.53    0.26 
 -22   0  -4    3.33    0.25 
  22   0   4    3.61    0.26 
 -22   0  -4    3.50    0.26 
  24   0   4    0.31    0.07 
  24   0   4    0.41    0.08 
 -24   0  -4    0.42    0.07 
 -24   0  -4    0.33    0.07 
  26   0   4    2.44    0.19 
  26   0   4    2.50    0.19 
 -26   0  -4    2.60    0.18 
  28   0   4    0.54    0.07 
  28   0   4    0.59    0.07 
 -28   0  -4    0.67    0.07 
  33  -1  -4    0.11    0.05 
 -33  -1   4    0.08    0.04 
 -33   1   4    0.11    0.04 
 -33   1   4    0.07    0.04 
  33   1  -4    0.10    0.05 
 -31  -1   4    0.28    0.07 
  31  -1  -4    0.27    0.07 
 -31  -1   4    0.33    0.07 
  31  -1  -4    0.29    0.07 
 -31   1   4    0.28    0.06 
 -31   1   4    0.26    0.06 
  31   1  -4    0.28    0.07 
  29  -1  -4    0.77    0.11 
  29  -1  -4    0.78    0.12 
 -29  -1   4    0.72    0.10 
 -29  -1   4    0.69    0.10 
 -29   1   4    0.76    0.10 
  29   1  -4    0.61    0.11 
 -29   1   4    0.63    0.09 
  27  -1  -4    0.10    0.07 
 -27  -1   4    0.05    0.05 
  27  -1  -4    0.06    0.06 
 -27  -1   4    0.06    0.06 
 -27   1   4    0.13    0.06 
 -27   1   4    0.05    0.06 
  27   1  -4    0.11    0.07 
 -25  -1   4    0.47    0.09 
 -25  -1   4    0.54    0.09 
 -25  -1   4    0.45    0.10 
  25  -1  -4    0.51    0.10 
  25  -1  -4    0.53    0.11 
 -25   1   4    0.57    0.09 
  25   1  -4    0.49    0.10 
 -25   1   4    0.64    0.09 
 -25   1   4    0.52    0.13 
  23  -1  -4    0.04    0.07 
 -23  -1   4    0.04    0.06 
 -23  -1   4    0.11    0.08 
 -23  -1   4    0.05    0.06 
  23  -1  -4    0.00    0.07 
  23   1  -4    0.01    0.06 
 -23   1   4    0.15    0.06 
 -23   1   4    0.14    0.06 
 -23   1   4    0.12    0.09 
 -21  -1   4    0.27    0.16 
 -21  -1   4    0.38    0.10 
  21  -1  -4    0.33    0.11 
 -21  -1   4    0.44    0.11 
 -21  -1   4    0.38    0.13 
 -21   1   4    0.47    0.13 
 -21   1   4    0.42    0.08 
 -21   1   4    0.44    0.14 
  21   1  -4    0.49    0.12 
 -19  -1   4    0.12    0.05 
  19  -1  -4    0.22    0.09 
 -19  -1   4    0.17    0.07 
 -19  -1   4    0.13    0.09 
 -19  -1   4    0.26    0.09 
  19   1  -4    0.13    0.07 
 -19   1   4    0.12    0.08 
 -19   1   4    0.10    0.08 
 -19   1   4    0.10    0.05 
  19   1  -4    0.05    0.04 
  17  -1  -4    0.74    0.11 
 -17  -1   4    0.74    0.08 
 -17  -1   4    0.65    0.13 
 -17  -1   4    0.71    0.10 
 -17  -1   4    0.81    0.12 
  17   1  -4    0.57    0.10 
  17   1  -4    0.55    0.08 
 -17   1   4    0.50    0.12 
 -17   1   4    0.52    0.08 
 -15  -1   4    2.73    0.23 
  15  -1  -4    2.99    0.24 
 -15  -1   4    3.12    0.27 
 -15  -1   4    3.11    0.23 
 -15  -1   4    3.02    0.20 
  15   1  -4    2.65    0.20 
  15   1  -4    2.74    0.23 
 -15   1   4    2.60    0.21 
 -15   1   4    2.81    0.26 
 -15   1   4    2.66    0.20 
 -15   1   4    2.29    0.22 
 -13  -1   4    2.37    0.20 
 -13  -1   4    2.20    0.23 
 -13  -1   4    2.16    0.20 
 -13  -1   4    2.35    0.18 
  13  -1  -4    2.41    0.21 
 -13   1   4    2.72    0.20 
 -13   1   4    2.31    0.20 
 -13   1   4    2.69    0.24 
  13   1  -4    2.70    0.18 
 -13   1   4    2.56    0.20 
 -13   1   4    2.51    0.18 
 -11  -1   4   10.55    0.71 
  11  -1  -4   11.20    0.69 
 -11  -1   4   11.06    0.67 
 -11  -1   4   10.63    0.65 
 -11  -1   4    9.80    0.67 
  11   1  -4   10.58    0.65 
 -11   1   4   10.33    0.66 
 -11   1   4   11.25    0.67 
 -11   1   4   10.97    0.70 
 -11   1   4    9.53    0.66 
   9  -1  -4   16.80    0.98 
  -9  -1   4   16.31    1.01 
  -9  -1   4   16.44    0.97 
  -9  -1   4   15.78    0.94 
   9   1  -4   14.82    0.95 
  -9   1   4   15.78    0.97 
  -9   1   4   15.67    0.96 
  -9   1   4   14.72    0.99 
  -7  -1   4    8.60    0.52 
  -7  -1   4    7.60    0.55 
  -7  -1   4    8.01    0.54 
  -7  -1   4    8.68    0.55 
  -7  -1   4    7.98    0.57 
   7  -1  -4    8.89    0.56 
  -7   1   4    9.33    0.55 
  -7   1   4    8.39    0.57 
  -7   1   4    9.05    0.54 
   7   1  -4    8.90    0.53 
  -5  -1   4   11.60    0.75 
   5  -1  -4   10.80    0.72 
  -5  -1   4   11.38    0.70 
  -5  -1   4   12.10    0.72 
  -5  -1   4   10.56    0.72 
  -5   1   4   12.11    0.72 
  -5   1   4   11.95    0.71 
   5   1  -4   11.22    0.70 
  -5   1   4   12.24    0.74 
  -3  -1   4    6.61    0.42 
  -3  -1   4    6.17    0.44 
   3  -1  -4    5.90    0.43 
  -3  -1   4    7.24    0.44 
  -3  -1   4    6.68    0.47 
  -3   1   4    7.16    0.45 
  -3   1   4    7.35    0.46 
  -3   1   4    7.13    0.44 
   3   1  -4    6.80    0.42 
  -1  -1   4   32.45    1.97 
  -1  -1   4   29.48    1.93 
  -1  -1   4   31.78    1.91 
   1  -1  -4   32.54    1.96 
  -1  -1   4   32.56    1.93 
  -1   1   4   34.03    1.93 
  -1   1   4   34.50    1.94 
   1   1  -4   32.13    1.91 
   1   1  -4   31.05    1.97 
  -1   1   4   34.22    1.96 
   1  -1   4    5.54    0.36 
   1  -1   4    5.35    0.41 
   1  -1   4    5.22    0.37 
   1  -1   4    5.68    0.38 
  -1  -1  -4    5.77    0.40 
   1   1   4    6.19    0.38 
   1   1   4    5.94    0.40 
  -1   1  -4    5.37    0.41 
   1   1   4    5.77    0.37 
  -1   1  -4    5.66    0.36 
  -3  -1  -4    3.63    0.27 
   3  -1   4    3.07    0.24 
   3  -1   4    3.57    0.25 
   3  -1   4    4.01    0.29 
   3  -1   4    3.72    0.23 
   3   1   4    3.07    0.24 
   3   1   4    3.18    0.25 
   3   1   4    3.38    0.27 
  -3   1  -4    3.05    0.28 
  -3   1  -4    2.92    0.22 
  -5  -1  -4    3.68    0.29 
   5  -1   4    3.76    0.30 
   5  -1   4    3.31    0.25 
   5  -1   4    3.74    0.24 
   5   1   4    3.56    0.29 
   5   1   4    3.29    0.26 
  -5   1  -4    3.13    0.23 
   5   1   4    3.32    0.25 
   7  -1   4    6.30    0.47 
   7  -1   4    5.58    0.43 
  -7  -1  -4    6.04    0.44 
   7  -1   4    6.49    0.39 
   7   1   4    5.34    0.39 
  -7   1  -4    5.45    0.37 
   7   1   4    5.86    0.40 
   7   1   4    6.26    0.45 
   9  -1   4    9.79    0.68 
   9  -1   4    9.79    0.72 
   9  -1   4   10.07    0.63 
   9   1   4    9.95    0.66 
   9   1   4   10.85    0.72 
   9   1   4    9.86    0.65 
  11  -1   4    9.00    0.71 
  11  -1   4    8.65    0.66 
  11  -1   4    9.35    0.66 
  11  -1   4    9.79    0.60 
  11   1   4   10.29    0.60 
  11   1   4    9.69    0.71 
  11   1   4    9.37    0.62 
  11   1   4    9.70    0.64 
  13  -1   4    3.48    0.34 
  13  -1   4    4.05    0.28 
  13  -1   4    3.38    0.38 
  13  -1   4    3.91    0.34 
  13   1   4    4.15    0.31 
  13   1   4    4.04    0.27 
  13   1   4    4.45    0.28 
  13   1   4    3.64    0.37 
  15  -1   4    0.65    0.19 
  15  -1   4    0.65    0.13 
  15  -1   4    0.67    0.17 
  15  -1   4    0.62    0.09 
  15   1   4    0.57    0.09 
  15   1   4    0.57    0.09 
  15   1   4    0.46    0.15 
  17  -1   4    3.26    0.26 
 -17  -1  -4    3.47    0.24 
 -17  -1  -4    3.53    0.26 
  17  -1   4    3.72    0.26 
 -17   1  -4    3.27    0.25 
  17   1   4    3.30    0.23 
  17   1   4    3.72    0.26 
  17   1   4    3.05    0.25 
 -17   1  -4    3.47    0.24 
  19  -1   4    0.23    0.09 
 -19  -1  -4    0.27    0.07 
 -19  -1  -4    0.16    0.06 
  19  -1   4    0.16    0.07 
 -19  -1  -4    0.30    0.09 
  19   1   4    0.09    0.06 
  19   1   4    0.17    0.04 
  19   1   4    0.30    0.12 
 -19   1  -4    0.12    0.07 
 -19   1  -4    0.17    0.06 
  19   1   4    0.24    0.07 
  21  -1   4    0.93    0.12 
 -21  -1  -4    0.85    0.16 
  21  -1   4    1.18    0.13 
 -21  -1  -4    1.07    0.12 
 -21  -1  -4    0.95    0.12 
 -21   1  -4    0.80    0.12 
 -21   1  -4    0.91    0.11 
  21   1   4    0.93    0.12 
  21   1   4    0.75    0.11 
 -23  -1  -4    0.84    0.11 
 -23  -1  -4    0.80    0.10 
  23  -1   4    0.72    0.11 
  23  -1   4    0.87    0.11 
 -23   1  -4    0.74    0.09 
 -23   1  -4    0.68    0.10 
  23   1   4    0.68    0.10 
  23   1   4    0.75    0.11 
  25  -1   4    0.70    0.10 
 -25  -1  -4    0.64    0.09 
 -25  -1  -4    0.65    0.08 
  25  -1   4    0.65    0.09 
  25   1   4    0.67    0.10 
  25   1   4    0.74    0.09 
 -25   1  -4    0.77    0.09 
  27  -1   4    0.76    0.09 
  27  -1   4    0.75    0.08 
 -27  -1  -4    0.74    0.09 
  27   1   4    0.86    0.09 
  27   1   4    0.83    0.09 
 -27   1  -4    0.87    0.09 
  32  -2  -4    0.75    0.10 
 -32  -2   4    0.88    0.10 
  32  -2  -4    0.87    0.11 
 -32   2   4    0.79    0.08 
 -32   2   4    0.83    0.09 
  32   2  -4    0.68    0.10 
 -30  -2   4    0.21    0.06 
 -30  -2   4    0.21    0.05 
  30  -2  -4    0.17    0.06 
  30  -2  -4    0.38    0.08 
  30   2  -4    0.24    0.08 
 -30   2   4    0.22    0.06 
 -30   2   4    0.21    0.06 
 -28  -2   4    1.52    0.15 
  28  -2  -4    1.62    0.16 
 -28  -2   4    1.64    0.15 
  28  -2  -4    1.72    0.17 
 -28   2   4    1.57    0.15 
  28   2  -4    1.50    0.18 
 -28   2   4    1.54    0.15 
  26  -2  -4    2.04    0.20 
 -26  -2   4    2.02    0.19 
 -26  -2   4    2.12    0.18 
  26  -2  -4    2.10    0.21 
 -26   2   4    2.41    0.18 
 -26   2   4    2.32    0.18 
  26   2  -4    2.19    0.22 
 -24  -2   4    9.95    0.62 
  24  -2  -4    9.89    0.64 
  24  -2  -4   10.61    0.65 
 -24  -2   4   10.30    0.62 
  24   2  -4    9.59    0.65 
 -24   2   4    9.36    0.68 
 -24   2   4    9.04    0.61 
 -24   2   4    9.89    0.61 
 -24   2   4    9.63    0.61 
  24   2  -4    9.11    0.64 
  22  -2  -4   14.66    0.87 
 -22  -2   4   14.02    0.84 
  22  -2  -4   13.47    0.86 
 -22  -2   4   11.13    0.92 
 -22  -2   4   14.12    0.85 
 -22  -2   4   14.39    0.86 
  22   2  -4   13.58    0.87 
 -22   2   4   13.74    0.83 
  22   2  -4   14.05    0.90 
 -22   2   4   13.50    0.81 
 -22   2   4   12.78    0.83 
 -22   2   4   14.08    1.06 
 -20  -2   4    0.55    0.11 
  20  -2  -4    0.58    0.14 
 -20  -2   4    0.60    0.17 
 -20  -2   4    0.51    0.14 
 -20   2   4    0.30    0.12 
  20   2  -4    0.30    0.07 
  20   2  -4    0.30    0.10 
 -20   2   4    0.25    0.07 
 -20   2   4    0.30    0.05 
 -18  -2   4    0.01    0.05 
 -18  -2   4    0.06    0.06 
  18  -2  -4    0.05    0.06 
 -18  -2   4    0.01    0.06 
  18   2  -4    0.08    0.07 
 -18   2   4    0.08    0.04 
 -18   2   4    0.11    0.08 
 -18   2   4    0.09    0.05 
 -18   2   4    0.13    0.06 
  18   2  -4    0.09    0.05 
 -16  -2   4    2.31    0.24 
 -16  -2   4    2.50    0.20 
 -16  -2   4    2.52    0.21 
  16  -2  -4    2.50    0.22 
 -16  -2   4    2.30    0.16 
 -16   2   4    2.00    0.19 
 -16   2   4    1.71    0.18 
  16   2  -4    2.19    0.18 
 -16   2   4    1.96    0.17 
 -16   2   4    1.84    0.22 
 -14  -2   4    8.05    0.53 
  14  -2  -4    8.23    0.55 
 -14  -2   4    8.19    0.58 
 -14  -2   4    7.70    0.49 
 -14  -2   4    8.35    0.53 
 -14   2   4    7.50    0.52 
 -14   2   4    7.88    0.56 
  14   2  -4    8.23    0.48 
  14   2  -4    7.53    0.51 
 -14   2   4    7.32    0.52 
 -12  -2   4   27.55    1.59 
 -12  -2   4   26.49    1.63 
  12  -2  -4   27.03    1.65 
 -12  -2   4   26.06    1.66 
 -12  -2   4   27.17    1.62 
 -12  -2   4   28.73    1.67 
  12   2  -4   25.91    1.58 
 -12   2   4   25.99    1.62 
  12   2  -4   26.00    1.61 
 -12   2   4   26.49    1.62 
 -12   2   4   26.55    1.61 
 -12   2   4   29.31    1.66 
 -10  -2   4   50.55    2.94 
 -10  -2   4   51.72    2.89 
 -10  -2   4   50.26    2.86 
 -10  -2   4   47.38    2.89 
  10  -2  -4   48.63    2.91 
  10   2  -4   47.30    2.85 
 -10   2   4   51.29    2.92 
 -10   2   4   44.22    2.88 
  10   2  -4   46.31    2.88 
 -10   2   4   50.69    2.89 
 -10   2   4   49.66    2.88 
  -8   2   4    0.85    0.09 
  -8   2   4    0.90    0.09 
  -8   2   4    0.78    0.10 
   8   2  -4    0.79    0.07 
  -6  -2   4    2.10    0.17 
  -6  -2   4    1.84    0.19 
   6  -2  -4    2.16    0.17 
  -6  -2   4    1.93    0.13 
  -6  -2   4    1.91    0.15 
  -6   2   4    1.65    0.15 
  -6   2   4    1.57    0.16 
   6   2  -4    1.76    0.15 
  -6   2   4    1.87    0.15 
   6   2  -4    1.63    0.12 
  -4  -2   4  109.24    6.15 
  -4  -2   4  108.64    6.10 
  -4  -2   4  109.40    6.10 
   4  -2  -4  100.44    6.10 
  -4  -2   4   98.03    6.10 
  -4   2   4  107.11    6.09 
  -4   2   4  104.41    6.11 
   4   2  -4  105.61    6.07 
  -4   2   4  100.85    6.10 
   4   2  -4   99.63    6.09 
   2  -2  -4   16.11    1.11 
  -2  -2   4   18.58    1.12 
  -2  -2   4   19.01    1.11 
   2  -2  -4   18.60    1.16 
  -2  -2   4   18.85    1.18 
  -2  -2   4   16.46    1.13 
   2   2  -4   18.65    1.12 
  -2   2   4   19.40    1.13 
  -2   2   4   19.43    1.12 
  -2   2   4   19.61    1.14 
   2   2  -4   19.14    1.09 
   2   2  -4   19.23    1.17 
   0  -2   4   13.91    0.97 
   0  -2   4   13.92    0.92 
   0  -2  -4   14.05    0.95 
   0  -2   4   14.96    0.91 
   0   2  -4   15.50    0.97 
   0   2  -4   15.59    0.89 
   0   2   4   15.55    0.91 
   0   2   4   16.14    0.94 
   0   2  -4   15.36    0.92 
   0   2   4   16.16    0.94 
   2  -2   4   25.01    1.50 
  -2  -2  -4   25.64    1.48 
   2  -2   4   21.89    1.45 
   2  -2   4   22.94    1.43 
   2  -2   4   26.05    1.42 
  -2   2  -4   23.19    1.49 
  -2   2  -4   22.52    1.40 
   2   2   4   23.73    1.45 
   2   2   4   24.00    1.43 
  -2   2  -4   23.45    1.43 
   2   2   4   24.71    1.46 
   4  -2   4    7.67    0.55 
  -4  -2  -4    8.22    0.54 
   4  -2   4    7.10    0.51 
   4  -2   4    8.05    0.48 
  -4   2  -4    7.66    0.55 
  -4   2  -4    6.96    0.46 
  -4   2  -4    7.59    0.50 
   4   2   4    7.99    0.49 
   4   2   4    7.81    0.52 
   6  -2   4    1.56    0.18 
   6  -2   4    1.54    0.16 
   6  -2   4    1.70    0.13 
  -6  -2  -4    1.60    0.18 
  -6   2  -4    1.36    0.18 
   6   2   4    1.37    0.13 
   6   2   4    1.22    0.12 
  -6   2  -4    1.37    0.13 
   6   2   4    1.44    0.16 
   8  -2   4   28.42    1.76 
   8  -2   4   28.86    1.71 
  -8  -2  -4   26.20    1.77 
   8  -2   4   26.24    1.81 
   8  -2   4   30.25    1.82 
   8   2   4   31.00    1.79 
   8   2   4   27.45    1.72 
  -8   2  -4   29.54    1.73 
   8   2   4   30.71    1.74 
  -8   2  -4   28.71    1.81 
  10  -2   4   48.93    2.91 
 -10  -2  -4   44.50    2.85 
  10  -2   4   46.59    2.83 
  10  -2   4   47.66    2.86 
  10  -2   4   48.33    2.77 
 -10   2  -4   43.28    2.94 
  10   2   4   47.17    2.81 
 -10   2  -4   49.94    2.79 
  10   2   4   47.19    2.80 
  10   2   4   46.61    2.87 
  12  -2   4    2.61    0.26 
  12  -2   4    2.84    0.22 
  12  -2   4    3.35    0.34 
  12  -2   4    2.88    0.29 
 -12   2  -4    2.90    0.22 
  12   2   4    2.89    0.25 
  12   2   4    3.40    0.26 
  12   2   4    2.93    0.21 
  12   2   4    3.23    0.31 
  14  -2   4   15.38    0.96 
  14  -2   4   15.96    1.07 
  14  -2   4   17.23    1.03 
  14  -2   4   14.68    1.12 
  14   2   4   13.73    1.07 
  14   2   4   16.44    0.96 
  14   2   4   16.61    1.01 
  16  -2   4    2.71    0.23 
  16  -2   4    3.17    0.27 
  16  -2   4    2.22    0.23 
 -16  -2  -4    2.63    0.21 
  16  -2   4    2.46    0.29 
 -16  -2  -4    2.79    0.22 
  16   2   4    2.98    0.21 
  16   2   4    2.59    0.19 
 -16   2  -4    2.74    0.20 
  16   2   4    2.72    0.30 
 -16   2  -4    2.56    0.21 
  16   2   4    2.93    0.28 
  16   2   4    2.58    0.21 
 -18  -2  -4    6.37    0.45 
 -18  -2  -4    6.46    0.46 
  18  -2   4    6.50    0.45 
 -18  -2  -4    6.43    0.44 
  18  -2   4    5.90    0.45 
  18  -2   4    6.77    0.49 
  18   2   4    7.17    0.42 
 -18   2  -4    7.45    0.45 
  18   2   4    7.30    0.45 
  18   2   4    7.08    0.44 
  18   2   4    6.86    0.45 
 -18   2  -4    7.01    0.43 
  20  -2   4    2.33    0.22 
  20  -2   4    2.77    0.21 
  20  -2   4    2.73    0.22 
 -20  -2  -4    2.59    0.23 
 -20  -2  -4    2.80    0.21 
 -20  -2  -4    2.74    0.21 
 -20   2  -4    2.57    0.21 
  20   2   4    2.56    0.21 
 -20   2  -4    2.66    0.20 
  20   2   4    2.53    0.18 
  20   2   4    2.58    0.21 
 -22  -2  -4    0.19    0.06 
  22  -2   4    0.23    0.07 
 -22  -2  -4    0.22    0.06 
 -22  -2  -4    0.36    0.09 
  22  -2   4    0.25    0.07 
 -22   2  -4    0.19    0.06 
 -22   2  -4    0.32    0.07 
  22   2   4    0.30    0.07 
  22   2   4    0.22    0.07 
  24  -2   4    1.25    0.13 
 -24  -2  -4    1.60    0.14 
  24  -2   4    1.34    0.13 
 -24  -2  -4    1.30    0.13 
  24   2   4    1.35    0.13 
  24   2   4    1.30    0.13 
 -24   2  -4    1.31    0.12 
  26  -2   4    1.10    0.11 
  26  -2   4    1.23    0.12 
 -26  -2  -4    1.13    0.11 
 -26  -2  -4    1.23    0.11 
  26   2   4    1.03    0.11 
 -26   2  -4    1.22    0.11 
  26   2   4    1.31    0.12 
  33  -3  -4    0.91    0.09 
 -33  -3   4    0.83    0.08 
  33  -3  -4    0.70    0.08 
 -33   3   4    0.74    0.08 
  31  -3  -4    1.51    0.14 
 -31  -3   4    1.38    0.13 
  31  -3  -4    1.41    0.13 
 -31   3   4    1.35    0.12 
 -31   3   4    1.34    0.12 
  29  -3  -4    2.50    0.20 
 -29  -3   4    2.17    0.18 
 -29  -3   4    2.44    0.20 
  29  -3  -4    2.45    0.21 
  29   3  -4    2.38    0.20 
 -29   3   4    2.39    0.18 
 -29   3   4    2.59    0.19 
  27  -3  -4    1.18    0.15 
 -27  -3   4    1.05    0.13 
  27  -3  -4    1.20    0.15 
 -27  -3   4    1.03    0.14 
 -27   3   4    1.63    0.14 
 -27   3   4    1.45    0.13 
  27   3  -4    1.45    0.16 
 -25  -3   4    1.22    0.14 
  25  -3  -4    1.51    0.16 
  25  -3  -4    1.05    0.15 
 -25  -3   4    1.26    0.14 
  25   3  -4    1.35    0.16 
 -25   3   4    0.80    0.17 
 -25   3   4    1.15    0.10 
 -25   3   4    1.21    0.13 
 -25   3   4    1.14    0.12 
 -23  -3   4    3.51    0.26 
 -23  -3   4    3.55    0.26 
  23  -3  -4    3.09    0.27 
  23  -3  -4    3.72    0.28 
  23   3  -4    2.96    0.27 
  23   3  -4    3.66    0.26 
 -23   3   4    3.10    0.22 
 -23   3   4    3.25    0.24 
  21  -3  -4    3.52    0.29 
 -21  -3   4    3.27    0.33 
 -21  -3   4    3.75    0.27 
 -21  -3   4    3.75    0.31 
 -21  -3   4    3.80    0.29 
  21  -3  -4    3.73    0.29 
  21  -3  -4    3.29    0.32 
  21   3  -4    3.43    0.33 
  21   3  -4    3.58    0.30 
  21   3  -4    3.08    0.28 
 -21   3   4    3.18    0.26 
 -21   3   4    3.81    0.25 
  21   3  -4    4.29    0.29 
 -21   3   4    3.62    0.28 
 -21   3   4    3.55    0.23 
 -19  -3   4    0.84    0.12 
 -19  -3   4    0.83    0.15 
  19  -3  -4    0.81    0.13 
 -19  -3   4    0.79    0.10 
 -19   3   4    0.80    0.12 
 -19   3   4    0.66    0.09 
 -19   3   4    0.80    0.15 
  19   3  -4    0.81    0.11 
 -19   3   4    0.83    0.09 
 -17  -3   4    6.43    0.50 
  17  -3  -4    6.72    0.49 
 -17  -3   4    5.76    0.51 
 -17  -3   4    6.84    0.46 
 -17  -3   4    6.64    0.44 
 -17   3   4    5.63    0.45 
  17   3  -4    6.72    0.41 
  17   3  -4    6.98    0.45 
 -17   3   4    6.26    0.41 
 -17   3   4    7.16    0.46 
 -17   3   4    6.47    0.50 
 -15  -3   4   20.76    1.24 
 -15  -3   4   20.96    1.23 
  15  -3  -4   19.10    1.27 
 -15  -3   4   19.33    1.30 
 -15   3   4   20.76    1.23 
  15   3  -4   20.88    1.19 
 -15   3   4   18.82    1.23 
  15   3  -4   21.45    1.24 
 -15   3   4   18.74    1.28 
  13  -3  -4    4.69    0.34 
 -13  -3   4    4.31    0.33 
 -13  -3   4    4.58    0.31 
 -13  -3   4    4.22    0.34 
 -13   3   4    4.02    0.29 
  13   3  -4    3.75    0.26 
 -13   3   4    3.47    0.28 
  13   3  -4    3.98    0.29 
 -13   3   4    3.49    0.31 
 -11  -3   4   16.15    0.94 
 -11  -3   4   15.73    0.98 
  11  -3  -4   15.71    0.97 
 -11  -3   4   15.71    0.93 
 -11  -3   4   15.29    0.90 
 -11  -3   4   16.29    0.99 
  11   3  -4   14.15    0.93 
 -11   3   4   14.17    0.95 
 -11   3   4   14.32    0.92 
 -11   3   4   13.59    0.92 
  11   3  -4   14.97    0.90 
  -9  -3   4   51.19    3.13 
  -9  -3   4   52.12    3.12 
  -9  -3   4   52.49    3.08 
  -9  -3   4   51.02    3.04 
  -9  -3   4   53.23    3.08 
   9  -3  -4   52.91    3.11 
   9   3  -4   52.86    3.08 
  -9   3   4   46.52    3.06 
  -9   3   4   51.28    3.07 
  -9   3   4   55.33    3.07 
  -9   3   4   51.34    3.09 
   9   3  -4   54.91    3.05 
   7  -3  -4   16.36    1.00 
  -7  -3   4   16.40    0.95 
  -7  -3   4   15.06    1.03 
  -7  -3   4   16.17    0.98 
  -7  -3   4   16.10    0.98 
   7   3  -4   16.30    0.95 
   7   3  -4   15.52    0.98 
  -7   3   4   15.75    0.98 
  -7   3   4   16.98    0.97 
  -7   3   4   15.23    0.98 
  -5  -3   4    8.61    0.58 
  -5  -3   4    8.25    0.52 
  -5  -3   4    8.74    0.50 
   5  -3  -4    8.44    0.55 
   5  -3  -4    7.85    0.53 
  -5   3   4    7.98    0.50 
   5   3  -4    8.16    0.49 
  -5   3   4    7.82    0.52 
   5   3  -4    7.39    0.52 
  -5   3   4    7.76    0.52 
  -3  -3   4   91.16    5.30 
  -3  -3   4   96.41    5.37 
  -3  -3   4   86.39    5.30 
  -3  -3   4   95.25    5.28 
   3  -3  -4   86.42    5.30 
   3  -3  -4   94.09    5.34 
   3   3  -4   91.48    5.28 
   3   3  -4   84.05    5.30 
  -3   3   4   90.40    5.30 
  -3   3   4   91.24    5.31 
  -3   3   4   89.16    5.28 
   1  -3  -4   36.76    2.18 
  -1  -3   4   37.22    2.12 
   1  -3  -4   35.30    2.18 
  -1  -3   4   36.00    2.15 
  -1  -3   4   33.04    2.13 
  -1  -3   4   34.89    2.20 
  -1   3   4   34.81    2.14 
  -1   3   4   36.86    2.15 
   1   3  -4   35.75    2.15 
   1   3  -4   37.85    2.12 
   1   3  -4   36.11    2.20 
  -1   3   4   37.89    2.12 
  -1  -3  -4   16.09    1.06 
   1  -3   4   15.45    1.02 
  -1  -3  -4   16.37    1.06 
   1  -3   4   14.26    1.06 
  -1   3  -4   17.10    1.07 
   1   3   4   17.77    1.00 
  -1   3  -4   17.89    0.99 
   1   3   4   16.34    1.02 
  -1   3  -4   17.37    1.02 
   1   3   4   17.04    1.03 
  -3  -3  -4   26.77    1.58 
  -3  -3  -4   23.50    1.56 
   3  -3   4   25.58    1.58 
   3  -3   4   24.20    1.52 
   3  -3   4   26.54    1.49 
   3   3   4   25.09    1.50 
  -3   3  -4   25.30    1.48 
  -3   3  -4   25.60    1.58 
   3   3   4   24.73    1.52 
  -3   3  -4   23.96    1.52 
  -5  -3  -4   23.99    1.45 
   5  -3   4   23.45    1.36 
   5  -3   4   22.31    1.46 
   5  -3   4   23.05    1.41 
  -5  -3  -4   23.56    1.45 
  -5   3  -4   23.26    1.36 
   5   3   4   24.35    1.38 
  -5   3  -4   22.57    1.46 
   5   3   4   20.12    1.36 
  -5   3  -4   22.99    1.40 
   5   3   4   22.72    1.41 
   7  -3   4    9.32    0.62 
   7  -3   4    9.10    0.64 
  -7  -3  -4    9.62    0.66 
   7  -3   4    8.89    0.67 
   7  -3   4    9.01    0.57 
  -7  -3  -4    9.60    0.67 
  -7   3  -4    9.58    0.68 
   7   3   4    8.64    0.58 
   7   3   4    9.80    0.60 
   7   3   4    9.25    0.63 
  -7   3  -4    9.54    0.61 
  -7   3  -4    9.08    0.56 
   9  -3   4    1.88    0.13 
   9  -3   4    1.71    0.20 
   9  -3   4    1.73    0.22 
  -9  -3  -4    1.96    0.22 
  -9  -3  -4    1.90    0.22 
   9   3   4    1.37    0.15 
  -9   3  -4    1.57    0.16 
   9   3   4    1.47    0.15 
   9   3   4    1.34    0.17 
  -9   3  -4    1.17    0.19 
  11  -3   4    9.02    0.56 
 -11  -3  -4    8.13    0.60 
 -11  -3  -4    7.89    0.59 
  11  -3   4    7.90    0.60 
  11  -3   4    8.01    0.53 
  11  -3   4    7.65    0.63 
 -11   3  -4    6.88    0.61 
  11   3   4    7.59    0.53 
  11   3   4    6.94    0.57 
  11   3   4    7.55    0.52 
  11   3   4    7.53    0.49 
 -11   3  -4    8.83    0.54 
  13  -3   4    3.45    0.28 
  13   3   4    3.46    0.23 
  13   3   4    3.19    0.26 
  13   3   4    2.54    0.29 
  13   3   4    3.07    0.26 
 -13   3  -4    2.48    0.32 
 -15  -3  -4    2.97    0.29 
  15  -3   4    3.49    0.31 
  15   3   4    4.32    0.32 
  15   3   4    4.32    0.27 
 -15   3  -4    4.07    0.28 
  15   3   4    3.57    0.48 
  15   3   4    3.58    0.31 
 -17  -3  -4    5.74    0.38 
  17  -3   4    5.13    0.38 
 -17  -3  -4    5.46    0.38 
 -17  -3  -4    5.31    0.40 
  17  -3   4    5.47    0.43 
  17  -3   4    5.69    0.38 
  17  -3   4    5.27    0.40 
 -17  -3  -4    6.18    0.39 
 -17   3  -4    5.85    0.37 
 -17   3  -4    5.95    0.38 
  17   3   4    5.21    0.39 
  17   3   4    5.63    0.38 
  17   3   4    5.70    0.36 
  17   3   4    5.98    0.43 
  17   3   4    5.71    0.37 
  19  -3   4   10.11    0.66 
 -19  -3  -4   10.74    0.67 
  19  -3   4    9.99    0.66 
 -19  -3  -4   10.58    0.68 
 -19  -3  -4   10.93    0.66 
  19  -3   4   10.01    0.68 
  19   3   4   10.15    0.66 
 -19   3  -4   11.11    0.65 
  19   3   4   10.46    0.63 
  19   3   4   10.13    0.65 
 -19   3  -4   10.78    0.66 
  19   3   4   10.74    0.66 
  21  -3   4    3.19    0.25 
 -21  -3  -4    3.59    0.26 
  21  -3   4    2.94    0.26 
 -21  -3  -4    3.37    0.25 
 -21  -3  -4    3.20    0.28 
  21  -3   4    3.22    0.26 
  21   3   4    3.53    0.25 
 -21   3  -4    3.73    0.25 
  21   3   4    3.71    0.23 
  21   3   4    3.98    0.26 
 -21   3  -4    3.59    0.25 
  23  -3   4    0.38    0.08 
 -23  -3  -4    0.41    0.08 
 -23  -3  -4    0.34    0.08 
 -23  -3  -4    0.39    0.07 
  23  -3   4    0.34    0.08 
  23   3   4    0.35    0.07 
 -23   3  -4    0.27    0.06 
  23   3   4    0.28    0.04 
  23   3   4    0.30    0.07 
  25  -3   4    0.31    0.06 
  25  -3   4    0.32    0.06 
 -25  -3  -4    0.39    0.06 
 -25  -3  -4    0.39    0.06 
  25   3   4    0.21    0.05 
 -25   3  -4    0.30    0.06 
  25   3   4    0.40    0.07 
 -27  -3  -4    0.29    0.05 
 -27  -3  -4    0.24    0.06 
  27  -3   4    0.24    0.05 
  27  -3   4    0.26    0.07 
  27   3   4    0.30    0.05 
  27   3   4    0.50    0.07 
 -27   3  -4    0.35    0.05 
 -32  -4   4    0.32    0.06 
  32  -4  -4    0.42    0.07 
  32  -4  -4    0.34    0.06 
 -32  -4   4    0.42    0.06 
 -32   4   4    0.51    0.07 
 -32   4   4    0.48    0.06 
  30  -4  -4    0.14    0.06 
 -30  -4   4    0.13    0.05 
  30  -4  -4    0.10    0.06 
 -30   4   4    0.13    0.05 
 -30   4   4    0.11    0.05 
  30   4  -4    0.18    0.06 
 -28  -4   4    0.36    0.08 
  28  -4  -4    0.38    0.08 
 -28  -4   4    0.37    0.07 
  28  -4  -4    0.49    0.09 
 -28   4   4    0.37    0.07 
 -28   4   4    0.37    0.07 
  28   4  -4    0.29    0.08 
  26  -4  -4    5.59    0.39 
  26  -4  -4    4.87    0.37 
 -26  -4   4    5.25    0.37 
 -26  -4   4    4.99    0.36 
 -26   4   4    5.49    0.35 
 -26   4   4    5.21    0.33 
 -26   4   4    5.57    0.35 
  26   4  -4    5.49    0.38 
  24  -4  -4    2.99    0.25 
 -24  -4   4    2.82    0.23 
 -24  -4   4    2.67    0.22 
  24  -4  -4    2.47    0.23 
  24   4  -4    2.73    0.24 
  24   4  -4    2.93    0.23 
 -24   4   4    2.82    0.19 
  24   4  -4    2.82    0.23 
 -24   4   4    2.81    0.21 
 -22  -4   4    1.16    0.15 
  22  -4  -4    1.08    0.16 
  22  -4  -4    1.18    0.15 
 -22  -4   4    1.26    0.15 
 -22   4   4    0.99    0.12 
 -22   4   4    1.22    0.10 
 -22   4   4    1.25    0.12 
  22   4  -4    1.29    0.15 
  22   4  -4    1.24    0.16 
  22   4  -4    1.42    0.15 
  20  -4  -4    0.81    0.13 
  20  -4  -4    0.84    0.16 
 -20  -4   4    0.65    0.24 
 -20  -4   4    0.91    0.12 
 -20  -4   4    0.76    0.11 
  20  -4  -4    0.83    0.13 
 -20   4   4    0.84    0.08 
  20   4  -4    1.00    0.14 
  20   4  -4    0.89    0.13 
 -20   4   4    0.90    0.11 
  20   4  -4    1.05    0.14 
 -20   4   4    1.05    0.10 
  20   4  -4    0.82    0.08 
 -20   4   4    0.98    0.13 
 -18  -4   4    0.37    0.10 
  18  -4  -4    0.40    0.13 
 -18  -4   4    0.37    0.13 
 -18   4   4    0.35    0.06 
 -18   4   4    0.24    0.08 
  18   4  -4    0.42    0.10 
  18   4  -4    0.36    0.06 
 -18   4   4    0.39    0.09 
 -18   4   4    0.32    0.11 
 -16  -4   4    0.44    0.14 
  16  -4  -4    0.33    0.12 
 -16  -4   4    0.36    0.09 
 -16   4   4    0.38    0.06 
 -16   4   4    0.36    0.11 
  16   4  -4    0.45    0.06 
 -16   4   4    0.40    0.09 
 -16   4   4    0.46    0.09 
  16   4  -4    0.48    0.10 
 -14  -4   4    5.59    0.45 
 -14  -4   4    5.48    0.37 
 -14  -4   4    5.79    0.41 
 -14  -4   4    5.73    0.45 
  14  -4  -4    5.49    0.44 
  14   4  -4    5.89    0.41 
 -14   4   4    5.40    0.43 
 -14   4   4    5.81    0.40 
 -14   4   4    5.80    0.39 
  14   4  -4    6.13    0.37 
 -12  -4   4    8.76    0.58 
 -12  -4   4    8.59    0.62 
 -12  -4   4    8.77    0.55 
  12  -4  -4    8.58    0.61 
  12   4  -4    9.14    0.54 
 -12   4   4    7.79    0.59 
 -12   4   4    8.28    0.55 
  12   4  -4    9.24    0.58 
 -12   4   4    9.49    0.57 
 -10  -4   4    1.90    0.16 
  10  -4  -4    1.88    0.20 
 -10  -4   4    1.77    0.26 
 -10  -4   4    2.04    0.21 
 -10  -4   4    2.00    0.18 
  10   4  -4    2.09    0.15 
 -10   4   4    2.02    0.16 
  10   4  -4    1.92    0.17 
 -10   4   4    1.80    0.21 
 -10   4   4    1.95    0.15 
  -8  -4   4    2.56    0.20 
   8  -4  -4    2.51    0.22 
  -8  -4   4    2.48    0.19 
  -8  -4   4    2.44    0.24 
  -8  -4   4    2.10    0.23 
   8   4  -4    2.56    0.17 
  -8   4   4    2.17    0.17 
   8   4  -4    2.53    0.20 
  -8   4   4    2.67    0.18 
  -6  -4   4    8.33    0.62 
  -6  -4   4    8.81    0.56 
  -6  -4   4    8.97    0.58 
   6  -4  -4    9.39    0.60 
  -6  -4   4    9.02    0.63 
  -6   4   4    9.34    0.58 
   6   4  -4    8.53    0.58 
   6   4  -4    8.91    0.55 
  -6   4   4    9.31    0.56 
   4  -4  -4    3.27    0.26 
   4  -4  -4    2.59    0.24 
   4  -4  -4    3.04    0.24 
  -4  -4   4    3.18    0.22 
  -4  -4   4    2.93    0.22 
  -4  -4   4    2.96    0.27 
   4   4  -4    3.00    0.20 
  -4   4   4    3.00    0.20 
   4   4  -4    2.72    0.23 
  -4   4   4    2.79    0.23 
   2  -4  -4   18.25    1.13 
   2  -4  -4   17.34    1.13 
  -2  -4   4   17.02    1.15 
   2  -4  -4   15.83    1.09 
   2   4  -4   16.63    1.10 
  -2   4   4   18.73    1.10 
  -2   4   4   19.47    1.07 
   2   4  -4   19.12    1.07 
   0  -4  -4   31.85    1.98 
   0  -4  -4   32.41    1.98 
   0  -4   4   29.99    1.99 
   0  -4   4   31.55    1.93 
   0   4   4   32.71    1.91 
   0   4  -4   34.01    1.91 
   0   4   4   33.13    1.95 
   0   4  -4   33.68    2.00 
   0   4  -4   31.86    1.95 
  -2  -4  -4    2.21    0.23 
   2  -4   4    2.44    0.20 
  -2  -4  -4    1.97    0.23 
  -2   4  -4    2.55    0.18 
  -2   4  -4    2.33    0.24 
   2   4   4    2.72    0.18 
  -2   4  -4    2.61    0.21 
   4  -4   4    2.45    0.25 
  -4  -4  -4    2.83    0.25 
   4   4   4    2.24    0.17 
  -4   4  -4    2.06    0.20 
  -4   4  -4    2.20    0.17 
  -4   4  -4    2.12    0.23 
  -6  -4  -4    3.15    0.30 
   6  -4   4    2.74    0.30 
  -6  -4  -4    2.96    0.30 
   6  -4   4    2.64    0.27 
   6  -4   4    3.04    0.25 
  -6   4  -4    3.40    0.22 
  -6   4  -4    3.64    0.32 
   6   4   4    3.40    0.23 
   6   4   4    3.04    0.22 
  -6   4  -4    3.33    0.26 
  -8  -4  -4    2.28    0.25 
   8  -4   4    1.92    0.25 
  -8  -4  -4    2.24    0.24 
   8  -4   4    2.27    0.20 
   8  -4   4    1.92    0.22 
   8   4   4    1.90    0.17 
   8   4   4    2.00    0.18 
  -8   4  -4    2.08    0.16 
  -8   4  -4    2.22    0.21 
  -8   4  -4    1.98    0.25 
  10  -4   4    2.53    0.34 
 -10  -4  -4    2.42    0.28 
  10  -4   4    2.37    0.27 
  10  -4   4    2.45    0.22 
 -10  -4  -4    2.99    0.29 
 -10   4  -4    2.61    0.19 
 -10   4  -4    2.67    0.24 
  10   4   4    2.41    0.21 
  10   4   4    2.24    0.18 
  10   4   4    3.11    0.23 
 -10   4  -4    2.81    0.31 
 -12  -4  -4    7.86    0.66 
 -12  -4  -4    8.55    0.66 
  12  -4   4    7.98    0.67 
  12  -4   4    8.90    0.59 
  12   4   4    9.05    0.61 
  12   4   4   10.13    0.61 
  12   4   4    9.54    0.56 
 -12   4  -4    9.93    0.62 
 -12   4  -4    8.68    0.71 
 -14  -4  -4    6.38    0.48 
 -14  -4  -4    5.67    0.65 
 -14  -4  -4    6.36    0.48 
 -14  -4  -4    7.20    0.50 
 -14   4  -4    7.35    0.46 
  14   4   4    8.33    0.47 
  14   4   4    7.95    0.51 
 -14   4  -4    7.46    0.50 
  14   4   4    7.69    0.60 
 -16  -4  -4    4.02    0.31 
 -16  -4  -4    4.05    0.29 
 -16  -4  -4    4.12    0.29 
  16  -4   4    3.96    0.30 
 -16  -4  -4    3.69    0.29 
  16   4   4    3.71    0.26 
  16   4   4    4.23    0.28 
 -16   4  -4    3.72    0.28 
 -16   4  -4    3.69    0.29 
 -16   4  -4    3.76    0.27 
  16   4   4    4.01    0.32 
  18  -4   4    0.58    0.10 
 -18  -4  -4    0.64    0.10 
 -18  -4  -4    0.60    0.12 
 -18  -4  -4    0.53    0.10 
 -18  -4  -4    0.43    0.09 
  18   4   4    0.59    0.08 
  18   4   4    0.60    0.09 
  18   4   4    0.61    0.10 
  18   4   4    0.61    0.12 
  18   4   4    0.65    0.09 
 -18   4  -4    0.66    0.09 
 -18   4  -4    0.55    0.09 
 -20  -4  -4    0.05    0.06 
 -20  -4  -4    0.13    0.06 
  20  -4   4    0.07    0.06 
 -20  -4  -4    0.08    0.07 
 -20  -4  -4    0.13    0.06 
  20   4   4    0.00    0.03 
  20   4   4    0.03    0.04 
 -20   4  -4   -0.04    0.05 
  20   4   4    0.05    0.05 
 -20   4  -4   -0.01    0.04 
  20   4   4    0.00    0.05 
 -22  -4  -4    0.60    0.08 
 -22  -4  -4    0.47    0.09 
  22  -4   4    0.48    0.09 
 -22  -4  -4    0.56    0.09 
  22   4   4    0.35    0.05 
  22   4   4    0.39    0.08 
  22   4   4    0.35    0.08 
 -22   4  -4    0.41    0.07 
  24  -4   4    0.20    0.06 
 -24  -4  -4    0.23    0.06 
 -24  -4  -4    0.20    0.06 
 -24  -4  -4    0.16    0.07 
  24   4   4    0.28    0.06 
  24   4   4    0.22    0.05 
 -24   4  -4    0.19    0.05 
  24   4   4    0.19    0.05 
 -26  -4  -4    0.16    0.04 
 -26  -4  -4    0.12    0.04 
  26  -4   4    0.09    0.04 
  26   4   4    0.15    0.04 
 -26   4  -4    0.15    0.04 
  31  -5  -4    1.11    0.11 
 -31  -5   4    1.21    0.11 
 -31  -5   4    1.25    0.11 
 -31   5   4    1.14    0.09 
  31   5  -4    1.13    0.10 
 -31   5   4    1.15    0.10 
  29  -5  -4    3.14    0.23 
 -29  -5   4    3.08    0.23 
 -29  -5   4    3.01    0.22 
 -29   5   4    2.70    0.20 
  29   5  -4    2.83    0.22 
 -29   5   4    2.69    0.20 
  27  -5  -4    3.62    0.27 
 -27  -5   4    3.50    0.26 
 -27  -5   4    3.31    0.24 
  27  -5  -4    3.45    0.27 
 -27   5   4    3.33    0.23 
 -27   5   4    3.29    0.23 
  27   5  -4    3.29    0.25 
  27   5  -4    3.59    0.26 
 -27   5   4    2.95    0.21 
 -25  -5   4    1.73    0.17 
  25  -5  -4    1.81    0.17 
 -25  -5   4    1.85    0.18 
  25  -5  -4    1.75    0.19 
 -25   5   4    1.82    0.16 
  25   5  -4    2.01    0.19 
  25   5  -4    1.73    0.17 
 -25   5   4    1.89    0.13 
 -23  -5   4    1.29    0.15 
 -23  -5   4    1.23    0.15 
  23  -5  -4    1.18    0.16 
  23  -5  -4    1.10    0.16 
  23   5  -4    1.09    0.15 
 -23   5   4    1.11    0.11 
 -23   5   4    1.17    0.10 
  23   5  -4    1.26    0.15 
  23   5  -4    1.02    0.16 
 -23   5   4    0.99    0.12 
 -21  -5   4    0.44    0.10 
 -21  -5   4    0.28    0.09 
  21  -5  -4    0.32    0.10 
 -21   5   4    0.27    0.06 
 -21   5   4    0.32    0.06 
  21   5  -4    0.22    0.08 
 -21   5   4    0.28    0.08 
  21   5  -4    0.30    0.08 
  21   5  -4    0.52    0.11 
 -21   5   4    0.37    0.05 
 -19  -5   4    4.58    0.35 
 -19  -5   4    4.79    0.35 
  19  -5  -4    4.89    0.36 
 -19   5   4    4.53    0.31 
 -19   5   4    5.26    0.37 
  19   5  -4    4.80    0.36 
  19   5  -4    4.77    0.35 
 -19   5   4    5.14    0.32 
  19   5  -4    4.90    0.37 
 -17  -5   4   10.29    0.68 
 -17  -5   4    9.88    0.72 
  17  -5  -4    9.51    0.71 
 -17   5   4    9.65    0.61 
  17   5  -4   10.14    0.62 
 -17   5   4    9.22    0.66 
  17   5  -4    9.95    0.67 
 -17   5   4   11.18    0.66 
 -15  -5   4   16.05    1.03 
 -15  -5   4   16.18    1.10 
  15  -5  -4   16.46    1.08 
 -15  -5   4   16.93    1.09 
  15   5  -4   16.47    0.99 
  15   5  -4   16.39    1.03 
 -15   5   4   16.04    1.02 
 -15   5   4   17.24    1.01 
 -15   5   4   15.10    0.97 
 -13  -5   4   11.29    0.81 
 -13  -5   4   11.16    0.80 
 -13  -5   4   10.87    0.75 
  13  -5  -4   10.56    0.79 
  13   5  -4   12.14    0.76 
  13   5  -4   12.25    0.71 
 -13   5   4   11.94    0.74 
 -13   5   4   12.25    0.73 
 -11  -5   4    8.33    0.63 
 -11  -5   4    8.74    0.64 
 -11  -5   4    8.52    0.59 
  11  -5  -4    8.46    0.63 
  11   5  -4    9.50    0.55 
 -11   5   4    9.03    0.56 
  11   5  -4    8.85    0.59 
 -11   5   4    9.02    0.57 
   9  -5  -4   12.02    0.75 
  -9  -5   4   11.30    0.77 
  -9  -5   4   11.24    0.71 
  -9  -5   4   11.57    0.76 
   9   5  -4   10.26    0.71 
   9   5  -4   11.26    0.67 
  -9   5   4    9.27    0.66 
  -9   5   4   11.29    0.68 
   7  -5  -4   13.37    0.83 
  -7  -5   4   12.24    0.80 
  -7  -5   4   13.20    0.87 
  -7   5   4   13.03    0.77 
   7   5  -4   11.59    0.80 
   7   5  -4   12.33    0.77 
   5  -5  -4    0.90    0.14 
   5  -5  -4    0.92    0.13 
   5   5  -4    0.91    0.09 
  -5   5   4    0.96    0.08 
   5   5  -4    0.94    0.12 
   3  -5  -4   13.71    0.86 
   3  -5  -4   12.59    0.83 
   3  -5  -4   12.32    0.85 
  -3  -5   4   14.29    0.90 
   3   5  -4   11.75    0.82 
  -3   5   4   12.97    0.78 
   3   5  -4   13.74    0.79 
  -3   5   4   12.34    0.82 
   1  -5  -4    5.70    0.44 
  -1  -5   4    5.57    0.46 
   1  -5  -4    5.56    0.43 
  -1   5   4    5.66    0.39 
  -1   5   4    5.87    0.35 
   1   5  -4    4.92    0.39 
   1   5  -4    5.80    0.36 
  -1  -5  -4   13.23    0.84 
  -1  -5  -4   11.64    0.83 
  -1   5  -4   10.84    0.78 
  -1   5  -4   13.34    0.85 
  -1   5  -4   12.66    0.75 
   1   5   4   12.11    0.73 
   1   5   4   11.60    0.78 
  -3  -5  -4   32.95    2.11 
  -3  -5  -4   34.63    2.11 
  -3   5  -4   35.14    2.02 
  -3   5  -4   35.00    2.12 
  -3   5  -4   32.51    2.06 
   3   5   4   33.87    2.01 
  -5  -5  -4   26.69    1.68 
  -5  -5  -4   26.56    1.67 
  -5   5  -4   26.46    1.57 
   5   5   4   26.30    1.57 
  -5   5  -4   25.62    1.62 
  -5   5  -4   26.60    1.69 
  -7  -5  -4   28.48    1.82 
  -7  -5  -4   29.87    1.84 
   7  -5   4   29.27    1.81 
  -7   5  -4   29.05    1.85 
   7   5   4   28.88    1.73 
  -7   5  -4   28.69    1.72 
  -7   5  -4   29.23    1.78 
   7   5   4   27.41    1.71 
   9  -5   4    8.45    0.63 
  -9  -5  -4    8.11    0.63 
  -9  -5  -4    8.30    0.63 
  -9   5  -4    7.58    0.64 
  -9   5  -4    8.53    0.58 
  -9   5  -4    8.21    0.52 
   9   5   4    8.45    0.53 
   9   5   4    7.56    0.53 
 -11  -5  -4    4.74    0.44 
 -11  -5  -4    5.44    0.44 
  11  -5   4    4.06    0.42 
 -11   5  -4    5.39    0.39 
  11   5   4    4.54    0.35 
  11   5   4    4.81    0.32 
 -11   5  -4    4.57    0.46 
  11   5   4    5.64    0.37 
 -11   5  -4    4.74    0.32 
 -13  -5  -4    6.96    0.45 
 -13  -5  -4    5.85    0.44 
 -13  -5  -4    6.16    0.44 
  13  -5   4    6.90    0.45 
 -13  -5  -4    6.96    0.45 
 -13   5  -4    6.53    0.42 
  13   5   4    6.26    0.42 
  13   5   4    7.28    0.47 
 -13   5  -4    5.95    0.47 
 -13   5  -4    6.53    0.43 
 -15  -5  -4    1.20    0.14 
 -15  -5  -4    1.03    0.15 
  15  -5   4    1.02    0.13 
 -15  -5  -4    0.97    0.12 
 -15  -5  -4    1.05    0.13 
 -15   5  -4    0.64    0.12 
 -15   5  -4    0.63    0.09 
  15   5   4    0.74    0.13 
 -15   5  -4    0.68    0.10 
  15   5   4    0.68    0.10 
  17  -5   4    2.80    0.24 
 -17  -5  -4    2.99    0.24 
 -17  -5  -4    2.98    0.25 
 -17  -5  -4    3.09    0.27 
 -17  -5  -4    2.72    0.24 
 -17   5  -4    2.82    0.24 
  17   5   4    3.50    0.23 
 -17   5  -4    3.28    0.23 
  17   5   4    3.25    0.27 
 -17   5  -4    3.10    0.23 
  17   5   4    3.18    0.21 
  17   5   4    3.07    0.27 
 -19  -5  -4    4.77    0.33 
 -19  -5  -4    4.86    0.35 
  19  -5   4    4.60    0.33 
 -19  -5  -4    4.74    0.33 
 -19  -5  -4    4.59    0.33 
  19   5   4    4.75    0.31 
  19   5   4    4.77    0.30 
 -19   5  -4    4.97    0.31 
 -19   5  -4    4.38    0.31 
  19   5   4    4.23    0.35 
 -21  -5  -4    0.84    0.10 
  21  -5   4    0.69    0.11 
 -21  -5  -4    0.55    0.09 
 -21  -5  -4    0.85    0.13 
 -21   5  -4    0.88    0.09 
  21   5   4    0.76    0.10 
  21   5   4    0.74    0.09 
  21   5   4    0.81    0.08 
 -23  -5  -4    0.20    0.06 
 -23  -5  -4    0.12    0.05 
  23  -5   4    0.15    0.06 
 -23  -5  -4    0.16    0.07 
 -23   5  -4    0.24    0.05 
  23   5   4    0.19    0.05 
  23   5   4    0.23    0.04 
  25  -5   4    0.01    0.04 
 -25  -5  -4    0.04    0.05 
 -25  -5  -4    0.05    0.04 
 -25   5  -4    0.09    0.03 
  25   5   4    0.06    0.04 
 -30  -6   4    0.26    0.05 
  30  -6  -4    0.29    0.06 
 -30  -6   4    0.19    0.05 
 -30   6   4    0.20    0.04 
  30   6  -4    0.15    0.05 
 -30   6   4    0.23    0.04 
  28  -6  -4    0.38    0.08 
 -28  -6   4    0.23    0.07 
 -28  -6   4    0.35    0.07 
  28   6  -4    0.24    0.07 
  28   6  -4    0.28    0.06 
 -28   6   4    0.22    0.05 
 -28   6   4    0.17    0.05 
 -26  -6   4    0.16    0.06 
 -26  -6   4    0.12    0.06 
 -26  -6   4    0.16    0.07 
  26  -6  -4    0.17    0.07 
 -26   6   4    0.09    0.05 
  26   6  -4    0.10    0.06 
 -26   6   4    0.05    0.03 
  26   6  -4    0.03    0.06 
 -24  -6   4    1.14    0.13 
 -24  -6   4    1.34    0.16 
 -24  -6   4    1.31    0.15 
  24  -6  -4    1.46    0.16 
 -24   6   4    0.91    0.10 
 -24   6   4    1.03    0.09 
  24   6  -4    1.02    0.14 
 -24   6   4    1.00    0.11 
 -22  -6   4    0.93    0.13 
 -22  -6   4    0.81    0.11 
  22  -6  -4    0.78    0.12 
  22   6  -4    0.70    0.11 
  22   6  -4    0.67    0.12 
 -22   6   4    0.52    0.08 
 -22   6   4    0.53    0.11 
 -22   6   4    0.57    0.07 
 -22   6   4    0.49    0.08 
 -20  -6   4    0.34    0.09 
  20  -6  -4    0.28    0.10 
 -20  -6   4    0.26    0.08 
  20   6  -4    0.10    0.07 
 -20   6   4    0.09    0.06 
 -20   6   4    0.10    0.04 
 -20   6   4    0.09    0.04 
  20   6  -4    0.11    0.07 
  20   6  -4    0.13    0.08 
 -18  -6   4    1.84    0.20 
 -18  -6   4    2.00    0.20 
 -18  -6   4    1.89    0.19 
  18  -6  -4    1.96    0.20 
  18  -6  -4    1.71    0.17 
  18   6  -4    1.81    0.19 
  18   6  -4    2.03    0.19 
 -18   6   4    2.10    0.19 
 -18   6   4    2.19    0.16 
  18   6  -4    1.95    0.20 
  16  -6  -4    6.17    0.43 
 -16  -6   4    5.82    0.42 
  16  -6  -4    5.87    0.55 
  16  -6  -4    5.70    0.42 
 -16  -6   4    6.11    0.44 
 -16  -6   4    6.33    0.44 
 -16  -6   4    6.47    0.52 
  16  -6  -4    6.48    0.42 
 -16  -6   4    5.62    0.45 
  16   6  -4    6.51    0.43 
 -16   6   4    6.54    0.39 
  16   6  -4    6.57    0.46 
  16   6  -4    6.36    0.42 
  16   6  -4    5.82    0.43 
  16   6  -4    5.95    0.39 
 -16   6   4    6.43    0.43 
 -14  -6   4    1.12    0.15 
 -14  -6   4    1.35    0.20 
 -14  -6   4    1.03    0.19 
  14  -6  -4    1.15    0.18 
  14   6  -4    1.27    0.12 
 -14   6   4    1.35    0.14 
 -14   6   4    1.35    0.13 
 -14   6   4    1.29    0.11 
  12  -6  -4    0.21    0.11 
 -12  -6   4    0.37    0.10 
 -12  -6   4    0.42    0.15 
 -12  -6   4    0.29    0.12 
  12   6  -4    0.36    0.06 
  12   6  -4    0.26    0.07 
 -12   6   4    0.33    0.07 
 -12   6   4    0.39    0.07 
 -10  -6   4    0.51    0.11 
  10  -6  -4    0.38    0.13 
 -10  -6   4    0.33    0.13 
 -10  -6   4    0.45    0.14 
 -10   6   4    0.57    0.07 
  10   6  -4    0.36    0.07 
 -10   6   4    0.34    0.06 
  10   6  -4    0.47    0.06 
   8   6  -4    1.61    0.14 
   8   6  -4    1.88    0.14 
  -8   6   4    1.75    0.14 
  -6   6   4    1.22    0.11 
   6   6  -4    1.42    0.12 
   4  -6  -4   14.31    0.94 
   4  -6  -4   13.89    0.92 
  -4  -6   4   15.29    0.99 
  -4   6   4   13.65    0.85 
   4   6  -4   13.91    0.86 
   2  -6  -4    2.50    0.25 
   2  -6  -4    2.00    0.23 
  -2  -6   4    2.27    0.27 
   2   6  -4    2.73    0.19 
   0  -6  -4    4.17    0.36 
   0  -6  -4    4.44    0.37 
   0  -6   4    4.46    0.39 
   0   6  -4    3.61    0.27 
   0   6   4    3.42    0.30 
  -2  -6  -4    5.00    0.43 
   2  -6   4    5.42    0.45 
  -2  -6  -4    5.78    0.44 
  -2   6  -4    4.90    0.34 
  -2   6  -4    4.75    0.42 
   2   6   4    4.83    0.32 
   2   6   4    4.65    0.37 
  -4  -6  -4    2.07    0.24 
  -4  -6  -4    1.98    0.24 
  -4   6  -4    1.54    0.21 
   4   6   4    1.67    0.13 
  -4   6  -4    1.67    0.15 
  -4   6  -4    1.71    0.19 
  -6  -6  -4    0.51    0.16 
  -6  -6  -4    0.43    0.15 
  -6   6  -4    0.75    0.13 
  -6   6  -4    0.77    0.09 
   6   6   4    0.70    0.08 
  -6   6  -4    0.86    0.16 
  -8  -6  -4    1.28    0.20 
  -8   6  -4    0.83    0.10 
  -8   6  -4    0.92    0.15 
  -8   6  -4    0.75    0.16 
   8   6   4    0.86    0.10 
   8   6   4    0.83    0.11 
  10  -6   4    2.09    0.27 
 -10  -6  -4    2.60    0.29 
 -10  -6  -4    2.26    0.20 
 -10  -6  -4    2.02    0.23 
 -10  -6  -4    2.59    0.21 
  10  -6   4    2.38    0.24 
 -10  -6  -4    2.08    0.28 
  10   6   4    2.11    0.19 
 -10   6  -4    2.13    0.18 
 -10   6  -4    1.92    0.17 
 -10   6  -4    2.13    0.20 
 -10   6  -4    1.97    0.22 
 -12  -6  -4    1.31    0.19 
  12  -6   4    1.29    0.15 
  12  -6   4    1.24    0.15 
 -12  -6  -4    1.52    0.16 
 -12  -6  -4    1.14    0.16 
 -12   6  -4    1.45    0.18 
 -12   6  -4    1.50    0.13 
  12   6   4    1.57    0.17 
  12   6   4    1.38    0.13 
 -12   6  -4    1.56    0.14 
  14  -6   4    1.23    0.14 
 -14  -6  -4    1.16    0.17 
 -14  -6  -4    1.31    0.15 
 -14  -6  -4    1.29    0.14 
  14   6   4    0.90    0.14 
 -14   6  -4    0.77    0.11 
 -14   6  -4    0.79    0.13 
  14   6   4    0.86    0.10 
 -14   6  -4    0.82    0.10 
 -16  -6  -4    0.54    0.10 
 -16  -6  -4    0.50    0.09 
 -16  -6  -4    0.56    0.10 
 -16  -6  -4    0.67    0.13 
  16  -6   4    0.48    0.09 
 -16   6  -4    0.23    0.07 
  16   6   4    0.31    0.10 
 -16   6  -4    0.34    0.07 
  16   6   4    0.33    0.07 
  16   6   4    0.30    0.06 
 -18  -6  -4    1.43    0.15 
 -18  -6  -4    1.35    0.18 
 -18  -6  -4    1.45    0.16 
  18  -6   4    1.53    0.15 
 -18  -6  -4    1.33    0.15 
 -18   6  -4    1.29    0.13 
 -18   6  -4    1.44    0.13 
  18   6   4    1.48    0.12 
  18   6   4    1.47    0.13 
  18   6   4    1.34    0.17 
 -20  -6  -4    2.51    0.20 
 -20  -6  -4    2.48    0.20 
  20  -6   4    2.29    0.20 
 -20  -6  -4    2.31    0.22 
  20   6   4    2.48    0.19 
  20   6   4    2.65    0.17 
 -20   6  -4    2.60    0.18 
 -22  -6  -4    0.32    0.07 
  22  -6   4    0.38    0.07 
 -22  -6  -4    0.28    0.06 
 -22  -6  -4    0.38    0.08 
  22   6   4    0.34    0.06 
  22   6   4    0.48    0.06 
 -22   6  -4    0.42    0.06 
 -24  -6  -4    0.05    0.04 
  24  -6   4    0.04    0.04 
 -24  -6  -4    0.05    0.05 
 -24  -6  -4    0.05    0.04 
 -24   6  -4    0.07    0.03 
  29  -7  -4    0.10    0.06 
 -29  -7   4    0.11    0.04 
 -29   7   4    0.19    0.05 
  29   7  -4    0.11    0.04 
 -29   7   4    0.13    0.04 
  27  -7  -4    0.28    0.07 
 -27  -7   4    0.23    0.06 
 -27  -7   4    0.34    0.07 
  27   7  -4    0.37    0.07 
 -27   7   4    0.36    0.06 
 -27   7   4    0.48    0.06 
  27   7  -4    0.49    0.08 
 -27   7   4    0.44    0.05 
 -25  -7   4    0.30    0.06 
 -25  -7   4    0.28    0.07 
 -25  -7   4    0.21    0.07 
  25  -7  -4    0.32    0.08 
  25   7  -4    0.34    0.08 
 -25   7   4    0.33    0.06 
 -25   7   4    0.33    0.04 
  25   7  -4    0.30    0.07 
 -25   7   4    0.19    0.04 
 -23  -7   4    0.23    0.08 
  23  -7  -4    0.42    0.10 
 -23  -7   4    0.28    0.07 
 -23  -7   4    0.40    0.09 
 -23   7   4    0.41    0.05 
  23   7  -4    0.35    0.09 
 -23   7   4    0.35    0.06 
 -23   7   4    0.21    0.08 
  23   7  -4    0.55    0.09 
 -23   7   4    0.33    0.06 
 -21  -7   4   -0.01    0.06 
 -21  -7   4    0.05    0.06 
 -21  -7   4    0.01    0.05 
  21  -7  -4    0.00    0.06 
 -21   7   4    0.02    0.05 
 -21   7   4    0.04    0.03 
  21   7  -4    0.04    0.06 
 -21   7   4    0.00    0.04 
 -21   7   4    0.02    0.04 
  21   7  -4    0.07    0.07 
  19  -7  -4    0.45    0.08 
 -19  -7   4    0.51    0.11 
 -19  -7   4    0.45    0.10 
  19  -7  -4    0.51    0.11 
 -19  -7   4    0.40    0.10 
 -19   7   4    0.50    0.08 
 -19   7   4    0.55    0.10 
  19   7  -4    0.53    0.10 
 -19   7   4    0.49    0.06 
  19   7  -4    0.55    0.11 
 -17  -7   4    1.46    0.17 
 -17  -7   4    1.47    0.17 
  17  -7  -4    1.32    0.17 
 -17  -7   4    1.49    0.17 
  17  -7  -4    1.48    0.16 
 -17   7   4    1.89    0.17 
 -17   7   4    1.87    0.14 
  17   7  -4    1.93    0.18 
  17   7  -4    1.89    0.19 
 -15  -7   4    0.27    0.09 
  15  -7  -4    0.20    0.07 
  15  -7  -4    0.26    0.09 
 -15  -7   4    0.17    0.07 
  15  -7  -4    0.17    0.07 
 -15  -7   4    0.21    0.08 
  15   7  -4    0.25    0.08 
  15   7  -4    0.41    0.10 
 -15   7   4    0.29    0.08 
 -15   7   4    0.38    0.06 
 -13  -7   4    6.31    0.52 
  13  -7  -4    6.34    0.42 
 -13  -7   4    5.85    0.48 
  13  -7  -4    6.08    0.43 
 -13  -7   4    6.29    0.43 
 -13  -7   4    6.34    0.42 
 -13  -7   4    6.51    0.43 
  13  -7  -4    6.61    0.43 
 -13   7   4    6.40    0.42 
  13   7  -4    6.11    0.42 
  13   7  -4    5.39    0.40 
  13   7  -4    5.62    0.42 
  11  -7  -4    2.34    0.28 
 -11  -7   4    2.63    0.30 
 -11  -7   4    2.29    0.29 
  11   7  -4    2.69    0.21 
  11   7  -4    2.72    0.20 
 -11   7   4    3.03    0.21 
 -11   7   4    2.88    0.22 
   9  -7  -4    2.73    0.29 
  -9  -7   4    2.94    0.31 
   9   7  -4    2.83    0.21 
   9   7  -4    2.90    0.21 
  -9   7   4    2.90    0.21 
   7  -7  -4    0.97    0.15 
  -7  -7   4    0.85    0.17 
   7   7  -4    0.83    0.09 
   7   7  -4    0.82    0.09 
  -7   7   4    0.74    0.08 
   5  -7  -4    8.72    0.62 
  -5  -7   4    8.99    0.67 
   5   7  -4    8.60    0.55 
   5   7  -4    8.23    0.54 
   3  -7  -4    6.98    0.54 
   3  -7  -4    6.31    0.52 
  -3  -7   4    7.38    0.58 
   3   7  -4    6.50    0.43 
   3   7  -4    7.11    0.45 
  -1  -7   4    3.49    0.36 
   1  -7  -4    3.67    0.34 
   1  -7  -4    3.02    0.32 
   1   7  -4    3.47    0.24 
   1   7  -4    3.77    0.25 
   1  -7   4    1.47    0.23 
  -1  -7  -4    1.50    0.21 
  -1  -7  -4    1.76    0.22 
  -1   7  -4    1.58    0.14 
  -1   7  -4    1.55    0.13 
  -3  -7  -4    0.39    0.15 
  -3  -7  -4    0.47    0.15 
  -3   7  -4    0.62    0.13 
  -3   7  -4    0.61    0.07 
   3   7   4    0.43    0.11 
  -3   7  -4    0.64    0.08 
  -5  -7  -4    0.36    0.14 
  -5  -7  -4    0.56    0.18 
   5   7   4    0.63    0.07 
  -5   7  -4    0.68    0.09 
  -5   7  -4    0.57    0.16 
  -7  -7  -4    2.63    0.24 
   7  -7   4    2.76    0.24 
  -7  -7  -4    3.00    0.35 
   7  -7   4    2.72    0.23 
  -7  -7  -4    2.70    0.25 
  -7  -7  -4    2.71    0.42 
   7   7   4    3.25    0.23 
  -7   7  -4    3.19    0.20 
  -7   7  -4    3.44    0.23 
  -7   7  -4    3.32    0.25 
  -7   7  -4    3.22    0.29 
   9  -7   4    0.75    0.12 
  -9  -7  -4    0.76    0.12 
   9  -7   4    0.79    0.12 
   9  -7   4    0.73    0.12 
  -9  -7  -4    0.82    0.15 
  -9  -7  -4    0.70    0.12 
  -9   7  -4    1.09    0.15 
  -9   7  -4    0.82    0.08 
   9   7   4    0.90    0.12 
  -9   7  -4    0.85    0.10 
  -9   7  -4    0.97    0.15 
  -9   7  -4    0.91    0.11 
 -11  -7  -4    0.07    0.08 
 -11  -7  -4    0.09    0.07 
  11  -7   4    0.14    0.07 
  11  -7   4    0.06    0.06 
 -11   7  -4    0.18    0.05 
 -11   7  -4    0.24    0.10 
  11   7   4    0.15    0.07 
 -11   7  -4    0.19    0.06 
 -13  -7  -4    1.22    0.18 
  13  -7   4    1.07    0.14 
  13  -7   4    1.03    0.14 
 -13  -7  -4    1.14    0.15 
 -13  -7  -4    1.19    0.16 
 -13  -7  -4    1.10    0.16 
 -13   7  -4    1.06    0.12 
  13   7   4    1.27    0.15 
 -13   7  -4    1.24    0.16 
  13   7   4    1.28    0.12 
 -13   7  -4    1.20    0.12 
 -15  -7  -4    0.34    0.09 
 -15  -7  -4    0.19    0.09 
  15  -7   4    0.27    0.07 
 -15  -7  -4    0.29    0.09 
 -15  -7  -4    0.25    0.08 
  15   7   4    0.30    0.09 
 -15   7  -4    0.24    0.06 
  15   7   4    0.33    0.06 
 -15   7  -4    0.36    0.07 
 -17  -7  -4    1.77    0.19 
 -17  -7  -4    1.53    0.16 
  17  -7   4    1.63    0.15 
 -17  -7  -4    1.64    0.15 
  17   7   4    1.31    0.11 
  17   7   4    1.35    0.13 
 -17   7  -4    1.40    0.12 
 -17   7  -4    1.18    0.13 
  17   7   4    1.26    0.16 
  19  -7   4    1.33    0.13 
 -19  -7  -4    1.30    0.14 
 -19  -7  -4    1.19    0.13 
 -19  -7  -4    1.30    0.15 
  19   7   4    0.98    0.11 
  19   7   4    1.13    0.10 
 -19   7  -4    1.12    0.11 
 -21  -7  -4    0.09    0.05 
 -21  -7  -4    0.12    0.06 
 -21  -7  -4    0.10    0.05 
  21  -7   4    0.15    0.05
[truncated: 271,596 more chars]
